# Supplementary material for: The Maternal Transcriptome of the Crustacean Parhyale hawaiensis Is Inherited Asymmetrically to Invariant Cell Lineages of the Ectoderm and Mesoderm
Source: PLoS One. 2013 Feb 13;8(2):e56049. doi: 10.1371/journal.pone.0056049 (PMC3572164; doi:10.1371/journal.pone.0056049)
Supplement: Table S1 — Microarray analysis of early vs. late embryonic transcriptomes. Full dataset from the transcriptome analysis of early (1- to 4-cell stage embryos) vs. late (embryonic day 2 to day 5) Parhyale embryos. The “Description” sheet of the Excel file contains an explanation of the table headers, as well as a list of samples and brief summary of the experimental procedure. (XLSX) [file pone.0056049.s004.xlsx]

## Sheet: Description
SERIES
title	The maternal transcriptome of the crustacean Parhyale hawaiensis is inherited asymmetrically to invariant cell lineages of the ectoderm and mesoderm
experiment	microarray analysis of early vs late embryonic transcriptomes
contributor	Peter Nestorov
contributor	Florian Battke
contributor	Mitchell P Levesque
contributor	Matthias Gerberding
institution	Max Planck Institute for Developmental Biology, Tuebingen, Germany
time of experiment	April 2008 to April 2009
summary	The embryo of the crustacean Parhyale hawaiensis has a total, unequal and invariant early cleavage. It specifies cell fates earlier than other arthropods like Drosophila, as individual blastomeres of the 8-cell stage are allocated to the germ layers and the germline. Furthermore, the 8-cell stage is amenable to embryological manipulations. These unique features make Parhyale a suitable system for…
	Maternal-zygotic transition takes place around the 32-cell stage, i.e. after the specification of germ layers. By comparing a pool of RNAs from early embryos without zygotic transcription to zygotic RNAs of the germband, we found that more than 15% of the targets on the array were enriched in the maternal transcript pool. A screen for asymmetrically distributed RNAs at the 8-cell stage revealed 1…
SAMPLES
Sample name	title	Agilent Feature Extraction file	ch1: source name	ch1: organism	ch1: molecule	ch1: label	ch2: source name	ch2: organism	ch2: molecule	ch2: label	description
Sample 1	Early stage (1-cell to 4-cell) versus late stage (Day2 to Day5) embryos replicate 1	Sample1_411_early_vs_late.txt	late stage embryos	Parhyale hawaiensis	total RNA	Cy5	early stage embryos	Parhyale hawaiensis	total RNA	Cy3	biological replicate 1 of 3; technical replicate 1 of 2
Sample 2	Early stage (1-cell to 4-cell) versus late stage (Day2 to Day5) embryos replicate 2	Sample2_421_early_vs_late.txt	late stage embryos	Parhyale hawaiensis	total RNA	Cy5	early stage embryos	Parhyale hawaiensis	total RNA	Cy3	biological replicate 1 of 3; technical replicate 2 of 2
Sample 3	Early stage (1-cell to 4-cell) versus late stage (Day2 to Day5) embryos replicate 3	Sample3_412_early_vs_late.txt	early stage embryos	Parhyale hawaiensis	total RNA	Cy5	late stage embryos	Parhyale hawaiensis	total RNA	Cy3	biological replicate 2 of 3; technical replicate 1 of 2
Sample 4	Early stage (1-cell to 4-cell) versus late stage (Day2 to Day5) embryos replicate 4	Sample4_414_early_vs_late.txt	early stage embryos	Parhyale hawaiensis	total RNA	Cy5	late stage embryos	Parhyale hawaiensis	total RNA	Cy3	biological replicate 2 of 3; technical replicate 2 of 2
Sample 5	Early stage (1-cell to 4-cell) versus late stage (Day2 to Day5) embryos replicate 5	Sample5_422_early_vs_late.txt	early stage embryos	Parhyale hawaiensis	total RNA	Cy5	late stage embryos	Parhyale hawaiensis	total RNA	Cy3	biological replicate 3 of 3; technical replicate 1 of 2
Sample 6	Early stage (1-cell to 4-cell) versus late stage (Day2 to Day5) embryos replicate 6	Sample6_424_early_vs_late.txt	early stage embryos	Parhyale hawaiensis	total RNA	Cy5	late stage embryos	Parhyale hawaiensis	total RNA	Cy3	biological replicate 3 of 3; technical replicate 2 of 2
PROTOCOLS
extract protocol	Trizol reagent and Qiagen Rneasy Micro Kit following manufacturer's instructions
label protocol	Low Input RNA Amplification Kit Plus (Agilent)
hyb protocol	Microarray hybridization was performed described in Agilent’s protocol “Two-colour microarray-based gene expression analysis”, v. 5.5 (2007). Washing was performed with stabilization and drying solution as described in the supplemental procedures of the same protocol.
scan protocol	Scanned on a GenePix 4000B scanner (Axon); Images were quantified using Agilent Feature Extraction Software (version 9.5).
data processing	Agilent Feature Extraction Software (v 9.5) was used for background subtraction and LOWESS normalization.
further data processing	the datasets were analyzed as described in the Methods part of the manuscript
PLATFORM
GEO ID	GPL16208
title	Agilent-019764 Ph gerberding
technology	in situ oligonucleotide
distribution	commercial
organism	Parhyale hawaiensis
manufacturer	Agilent Technologies
Agilent control grid	IS-15744-8-V1_8x15K_Gx_EQC_V20060608
manufacture protocol	see manufacturer's web site at http://www.agilent.com/
Platform_description	Features are numbered numbered Left-to-Right, Top-to-Bottom as scanned by an Agilent scanner (barcode on the left, DNA on the back surface, scanned through the glass), matching the FeatureNum output from Agilent's Feature Extraction software.
	The ID column represents the Agilent Feature Extraction feature number.
	Rows and columns are numbered as scanned by an Axon Scanner (barcode on the bottom, DNA on the front surface).
	To match data scanned on an Axon scanner, use the RefNumber column contained in the Agilent-provided GAL file as the ID_REF column in sample submissions.
MATRIX_LOGFC HEADERS
ID_REF	Agilent feature number from platform GPL16208
SPOT_ID	Spot identifier
Target	Name of target EST/contig sequence
TargetContig	Name of Target contig after sequence alignment and contig assembly (probes that were discarded for technical reasons do not correspond to Contigs)
Sample1_Log10FC	log10 Cy5/Cy3 fold change value calculated after feature extraction (Agilent Feature Extraction software v 9.5)
Sample2_Log10FC	log10 Cy5/Cy3 fold change value calculated after feature extraction (Agilent Feature Extraction software v 9.5)
Sample3_Log10FC	log10 Cy5/Cy3 fold change value calculated after feature extraction (Agilent Feature Extraction software v 9.5)
Sample4_Log10FC	log10 Cy5/Cy3 fold change value calculated after feature extraction (Agilent Feature Extraction software v 9.5)
Sample5_Log10FC	log10 Cy5/Cy3 fold change value calculated after feature extraction (Agilent Feature Extraction software v 9.5)
Sample6_Log10FC	log10 Cy5/Cy3 fold change value calculated after feature extraction (Agilent Feature Extraction software v 9.5)
PROCESSED_ANNOTATED_RESULTS HEADERS
ControlType	indicates control type for control probes, where "1" is a positive and "-1" is a negative control probe. All probes of "0" control type are corresponding to Parhyale target sequences.
TargetContig	Name of Target contig after sequence alignment and contig assembly
Sequence description	Sequence description according to top BLAST hit (automatically annotated with blast2go)
min. eValue	minimal eValue for BLAST hit used for sequence description
GOs	associated Gene Ontology terms extracted from BLAST results (blast2go)
MultiSpot	Total number of spots for a given target on the microarray
MultiProbe	Total number of probes for a given target
logFC	log2 late/early fold change value calculated after analyzing all replicates using R and the limma package as described in the Methods section, negative values correspond to enrichment in the early embryonic RNA pool
AveExpr	average expression value for all replicates after normalization and data processing with R and the limma package (value from 1 to 16)
t	t value for all replicates after normalization and data processing with R and the limma package
P.Value	p-value value for all replicates after normalization and data processing with R and the limma package
adj.P.Val	adjusted p-value for all replicates after normalization and data processing with R and the limma package
B	odds value for all replicates after normalization and data processing with R and the limma package

## Sheet: matrix_logfc
ID_REF	SPOT_ID	Target	TargetContig	Sample1_Log10FC	Sample2_Log10FC	Sample3_Log10FC	Sample4_Log10FC	Sample5_Log10FC	Sample6_Log10FC
1	GE_BrightCorner	GE_BrightCorner	GE_BrightCorner	0.341247	0.382105	-0.0583819	-0.137871	-0.0908922	-0.104203
2	DarkCorner	DarkCorner	DarkCorner	0	0	0	0	0	0
3	DarkCorner	DarkCorner	DarkCorner	0	0	0	0	-0.381726	0
4	CUST_220_PI380538640	zams08_P12_034	Contig0266	0	0	-0.112699	0	0	0
5	CUST_43_PI380538642	zams14_C03_014	Contig0216	0.213422	0	-0.187852	0	0	0
6	CUST_2700_PI379238085	3496407_4	Contig0435_ext	0.214019	0.268411	-0.181593	0.121899	-0.174613	0.132584
7	CUST_3362_PI379238085	3499814_1	Contig0784_ext	-0.133474	-0.140233	0.212096	0.375821	0.229664	0.447828
8	CUST_7_PI380567544	Ph_Wnt-A,	Ph_Wnt-A,	-0.038607	0.0835438	-0.079667	0	0.0427242	0
9	CUST_313_PI380538650	zamn07_L16_054	zamn07_L16_054.ab1	0	0	0	0	0	0
10	CUST_7547_PI379238085	3498253_1	3498253_1	-1.33381	-1.71947	1.43108	0.309082	1.76084	0.503755
11	CUST_9313_PI379238085	3508249_1	3508249_1	0.478052	0.53192	-0.461195	0.0931095	-0.397061	0.168931
12	CUST_3324_PI379238085	3508198_1	3508198_1	-0.23914	-0.256148	0.0323217	0.0971155	0.265845	0.279476
13	CUST_254_PI380538650	zamn06_O20_066	zamn06_O20_066.ab1	0.543129	0.539588	-0.587304	-0.103523	-0.551873	-0.00594439
14	CUST_177_PI380538636	zams01_K08_022	Contig0108	0	0	0	0	0	0
15	CUST_83_PI380538650	zamn04_G24_090	Contig0064	-0.0925261	0	0	0	0.134425	0
16	CUST_555_PI379238085	3495780_1	3495780_1	0.237139	0.271181	-0.277166	-0.615121	-0.228382	-0.607388
17	CUST_115_PI380567544	DQ827721.1	DQ827721.1	0.287059	0.0550498	-0.0867688	0	-0.101847	0.15325
18	CUST_78_PI380538640	zams13_A12_048	zams13_A12_048.ab1	-0.238422	0	0	0	-0.203214	0
19	CUST_501_PI380538642	zams14_G12_042	Contig0174	-0.890014	0	0	0	-0.258865	0
20	CUST_6885_PI379238085	3496934_2	3496934_2	0.606224	0.620061	-0.658384	-0.6385	-0.661885	-0.430792
21	CUST_7106_PI379238085	3504066_1	3504066_1	-0.368487	-0.495018	0.38925	0.0741616	0.513336	0.199166
22	CUST_2928_PI379238085	3509100_2	3509100_2	0.300379	-0.0411075	0	0	0.0109835	0
23	CUST_2864_PI379238085	3496651_2	#N/A	0.977689	1.06515	-0.730515	0	-0.759308	0
24	CUST_84_PI380538636	zams02_O07_018	#N/A	0	0	0	0	0	0
25	CUST_8087_PI379238085	3502900_1	Contig0947_ext	0.209093	0.216505	-0.0912749	-0.121854	-0.0451113	-0.270473
26	CUST_73_PI380567544	Ph_vasa,	Ph_vasa,	-1.26787	-1.20922	1.39797	0.813944	1.43698	0.772144
27	CUST_13_PI380538646	zams22_D02_013	#N/A	0	0	0	0	0	0
28	CUST_4869_PI379238085	3500096_1	Contig1018	1.68177	1.52359	-1.44106	0	-1.39213	0
29	CUST_59_PI380538636	zams03_O19_066	Contig0109	-1.62585	-1.55149	1.63153	0.516613	1.53615	0.57994
30	CUST_2096_PI379238085	3498730_2	3498730_2	-1.36395	-1.44905	1.35581	0.978856	1.14828	0.924027
31	CUST_455_PI379238085	3496971_3	Contig0532	0.1173	0.0810283	-0.00865596	-0.0352778	-0.0073642	-0.0779664
32	CUST_469_PI380538642	zams16_I21_087	#N/A	0	0	0	0	0	-0.086652
33	CUST_65_PI380538644	zams19_H11_042	zams19_H11_042.ab1	0	0	0	0	-0.268786	0
34	CUST_125_PI380567544	DQ917573.1	DQ917573.1	0.771758	0.513857	-0.771182	0	-0.629292	0
35	CUST_97_PI380567544	Ph_Wnt-Gr2,	Ph_Wnt-Gr2,	0	0	-0.414649	0	-0.0016821	0
36	CUST_412_PI380538640	zams09_H21_089	#N/A	0	0	0	0	0	0
37	CUST_476_PI380538642	zams14_B10_047	zams14_B10_047.ab1	0	0	0	0	0	0
38	CUST_392_PI380538646	zams22_P06_017	#N/A	0	0	0	0	0	0
39	CUST_761_PI379238085	3509147_2	3509147_2	0	0.138216	0	0	0	0
40	CUST_65_PI380538640	zams08_N07_020	#N/A	-0.245938	-0.298366	0.500938	-0.623029	0.465703	-0.629315
41	CUST_5525_PI379238085	3496860_1	3496860_1	-0.138402	-0.275431	0.234995	-0.0547212	0.239322	-0.096708
42	CUST_196_PI380538636	zams03_I17_071	zams03_I17_071.ab1	0	0	0	0	0	-0.0760537
43	CUST_287_PI379238089	zaFBplate1_E16_060.ab1	zaFBplate1_E16_060.ab1_R	-0.413475	-0.479588	0.702845	0	0.292227	0
44	CUST_9053_PI379238085	3510176_1	#N/A	-0.0656865	0	0.598933	0	0.32419	-0.0407287
45	CUST_4942_PI379238085	3500045_3	3500045_3	0.293954	0.296951	-0.33709	-0.502337	-0.330359	-0.499316
46	CUST_88_PI380538638	zams04_D05_029	#N/A	0	0	0	0	0	0
47	CUST_324_PI380538640	zams11_P17_065	Contig0842	0.395391	0.405368	-0.322455	-0.343704	-0.322588	-0.32946
48	CUST_127_PI380538650	zamn02_G18_073	Contig0752_ext	-0.808851	-0.838166	0.918738	0.624466	0.931491	0.587645
49	CUST_389_PI380538638	zams04_P02_001	zams04_P02_001.ab1	0	0.0319195	0	0	0	0
50	CUST_8542_PI379238085	3500370_1	Contig0818	0.266998	0.316818	-0.313214	-0.150224	-0.350723	-0.123448
51	CUST_311_PI380538646	zams22_I11_040	zams22_I11_040.ab1	0	0	0	0	0	-0.219021
52	CUST_6746_PI379238085	3504235_1	#N/A	0.518846	0	-0.511856	0	-0.0221276	-0.223525
53	CUST_283_PI380538640	zams11_F16_060	#N/A	0	0	0	0	0	0
54	CUST_169_PI380538648	zamn02_B10_047	zamn02_B10_047.ab1	0	0	0	0	0	-0.21581
55	CUST_8142_PI379238085	3501041_1	3501041_1	0.470725	0.485907	-0.664962	0	-0.256774	-0.143492
56	CUST_1910_PI379238085	3498702_1	3498702_1	-1.47176	-1.1973	1.92105	0.757222	0.703422	0.443399
57	CUST_221_PI380538648	zamn04_D11_046	zamn04_D11_046.ab1	0	0	0	0	-0.0867651	-0.0732855
58	CUST_892_PI379238085	3498067_1	3498067_1	2.18336	2.23745	-2.02882	0	-1.92024	-0.371643
59	CUST_7856_PI379238085	3510025_1	3510025_1	0.685109	0.414507	-0.484832	0	-0.358777	-0.132634
60	CUST_4351_PI379238085	3498791_3	Contig0715	1.2995	1.36067	-1.13445	-1.37215	-1.09859	-1.08538
61	CUST_339_PI380538650	zamn05_A04_016	zamn05_A04_016.ab1	0	0	0	0	-0.284518	-0.234141
62	CUST_2006_PI379238085	3506834_2	3506834_2	-0.928249	-0.874724	0.853437	0.920304	0.527091	0.594981
63	CUST_359_PI380538646	zams24_C15_062	zams24_C15_062.ab1	-0.307196	0	0	0	-0.251569	0
64	CUST_2494_PI379238085	3506864_1	3506864_1	0.616579	0.536223	-0.51889	0	-0.236249	-0.282863
65	CUST_338_PI380538636	zams03_A14_063	#N/A	-0.0229799	-0.043127	0.104763	-0.000583256	0.0494974	0.0773086
66	CUST_5354_PI379238085	3508888_2	3508888_2	0.135098	0.0184706	-0.132966	0	-0.175798	0
67	CUST_584_PI379238085	3504650_1	3504650_1	0.288405	0.212935	-0.252623	-0.134319	-0.222008	0.0455768
68	CUST_8916_PI379238085	3501394_2	Contig0909	0.162074	0.186853	0.173421	1.56927	0.12164	1.80038
69	CUST_9230_PI379238085	3495920_3	Contig0344	-0.136751	-0.101677	0.286804	0.512364	0.223944	0.643106
70	CUST_253_PI379238087	zaFBplate1_D16_062.ab1	Contig0305	-0.597381	-0.618837	0.480818	0.0410498	0.497595	0.221701
71	CUST_7_PI380538642	zams17_P03_002	zams17_P03_002.ab1	-0.385574	-0.364542	0.340111	0.333437	0.200088	0.663825
72	CUST_787_PI379238085	3499184_1	Contig0752	0.226359	0.22919	-0.091037	-0.570109	-0.151756	-0.394099
73	CUST_5311_PI379238085	3510166_2	Contig1032	-1.36162	-1.46153	1.49301	0.514291	1.3437	0.409946
74	CUST_4556_PI379238085	3496510_2	3496510_2	-0.118091	-0.177156	0.206029	0.132189	0.244741	0.312761
75	CUST_301_PI380538638	zams04_J10_039	zams04_J10_039.ab1	-0.0699425	-0.32979	0	0	-0.0359331	0
76	CUST_2966_PI379238085	3509002_1	3509002_1	-0.446355	-0.275538	0.301452	0.102556	0	0.151834
77	CUST_7484_PI379238085	3496101_2	Contig0380	1.41433	1.47227	-1.22944	-1.61657	-1.24417	-1.52133
78	CUST_395_PI380538640	zams11_A06_031	zams11_A06_031.ab1	0.354779	0.0348151	0	0	0	-0.160078
79	CUST_2738_PI379238085	3499454_1	3499454_1	0.922221	0.95618	-0.892748	-0.79914	-1.01085	-0.725677
80	DarkCorner	DarkCorner	DarkCorner	0	0	0	0	0	0
81	GE_BrightCorner	GE_BrightCorner	GE_BrightCorner	0.236783	0.332179	-0.0591431	-0.137915	-0.0456395	-0.020084
82	GE_BrightCorner	GE_BrightCorner	GE_BrightCorner	0.295642	0.331775	-0.0101614	-0.137995	-0.0126096	-0.013852
83	GE_BrightCorner	GE_BrightCorner	GE_BrightCorner	0.335015	0.371477	-0.0613707	-0.120774	-0.0686554	-0.12623
84	DarkCorner	DarkCorner	DarkCorner	0	0.250745	0	0	-0.453022	0
85	CUST_8040_PI379238085	3499684_3	3499684_3	-0.332067	-0.414642	-0.00888893	0	0.0772183	0
86	CUST_6739_PI379238085	3496338_1	Contig0427	-0.137099	-0.120523	0.0930884	0.302327	0.0844785	0.334683
87	CUST_1459_PI379238085	3496536_2	3496536_2	0.0311269	0.0417328	0.272779	-0.268759	0.292431	-0.195621
88	CUST_113_PI380538636	zams02_J08_024	zams02_J08_024.ab1	-0.646343	-0.587479	0.728196	0.301572	0.817517	0.361691
89	CUST_92_PI379238087	zaFBplate1_P13_049.ab1	zaFBplate1_P13_049.ab1_F	0.254219	0.329059	-0.313214	0	-0.309134	0
90	CUST_6166_PI379238085	3509436_1	3509436_1	0	0	0	0	-0.291774	0
91	CUST_28_PI379238087	zaFBplate1_E21_091.ab1	zaFBplate1_E21_091.ab1_F	0.219141	0	0	0	0.251306	0
92	CUST_435_PI380538646	zams23_I07_024	Contig0233	-0.853758	-0.727628	0.571752	0.584233	0.701846	0.553837
93	CUST_5478_PI379238085	3495910_3	#N/A	0.0996988	0.225893	0.0404716	-0.331631	0.0413534	-0.269892
94	CUST_7997_PI379238085	3502944_1	#N/A	-0.467849	-0.38108	0.600381	0.404375	0.654171	0.430971
95	CUST_23_PI380567544	DQ827720.1	DQ827720.1	0	0	0	0	0	0
96	CUST_5509_PI379238085	3498041_1	Contig0752	-0.30442	-0.331797	0.329722	0.0936166	0.315731	0.31929
97	CUST_7755_PI379238085	3501222_3	#N/A	0.219899	0.311091	-0.128299	-0.120479	-0.116314	-0.0856737
98	CUST_8091_PI379238085	3503289_1	3503289_1	-0.0831775	-0.0418211	-0.349184	0	0.236867	0
99	CUST_2832_PI379238085	3496597_2	Contig0468	0.580626	0.589855	-0.582885	-0.723135	-0.54629	-0.692477
100	CUST_164_PI380538644	zams19_A18_079	#N/A	0	0	0	0	-0.37066	0
101	CUST_657_PI379238085	3497283_2	Contig0573	0.0794791	0.129372	-0.220026	-0.45293	-0.172507	-0.377058
102	CUST_6145_PI379238085	3497398_1	3497398_1	1.79703	1.47571	-1.6939	-1.03323	-1.68727	-0.965933
103	CUST_1496_PI379238085	3503328_1	#N/A	-0.0718465	0.00621644	0.189711	-0.127559	0.210672	-0.0524225
104	CUST_110_PI380567544	DQ917571.1	DQ917571.1	-0.438237	-0.733796	0.887632	0	0.682957	0
105	(+)E1A_r60_n11	E1A_r60_n11	E1A_r60_n11	-0.425676	-0.525069	-0.0746847	-0.185675	-0.0694101	-0.161016
106	CUST_114_PI380538636	zams02_O03_002	#N/A	0.133892	0.198085	0.235075	-0.295731	0.242294	-0.270433
107	CUST_6302_PI379238085	3504180_2	3504180_2	0	0	0	0	0	0
108	CUST_18_PI380538646	zams22_D22_093	zams22_D22_093.ab1	0	0	0	0	-0.49585	0
109	CUST_54_PI380567544	Ph_Wnt-Gr1,	Ph_Wnt-Gr1,	0	0	0	0	0.242348	0
110	CUST_5543_PI379238085	3501967_1	3501967_1	-0.9863	-1.02793	0.980701	0.620749	0.960271	0.592051
111	CUST_3088_PI379238085	3501032_1	3501032_1	1.82646	1.15672	-1.96448	-0.653345	-1.34758	-0.633087
112	CUST_88_PI380538646	zams24_O13_049	zams24_O13_049.ab1	0	0.176187	0	0	-0.250214	0
113	CUST_2108_PI379238085	3503913_2	3503913_2	0.856083	0.74065	-0.705325	-0.45984	-0.734036	-0.355925
114	CUST_7544_PI379238085	3509242_1	3509242_1	-0.140355	-0.179315	0.243539	0.28189	0.301927	0.182089
115	CUST_5100_PI379238085	3499647_1	3499647_1	0.166607	0.23686	0.150668	0.0945414	0.141835	0.065203
116	CUST_174_PI380538646	zams22_K12_038	Contig0682	-0.0953362	-0.0470971	0.178491	0.0742375	0.162994	0.0136954
117	CUST_4601_PI379238085	3505228_1	3505228_1	-0.154048	-0.0792181	0.111151	0	0.00849892	0
118	CUST_3015_PI379238085	3503605_1	3503605_1	0	0	0	0	-0.464001	0
119	CUST_4914_PI379238085	3496749_1	3496749_1	-0.104066	-0.102236	0.0415979	0.577063	0.0327898	0.384997
120	CUST_109_PI380567544	DQ917571.1	DQ917571.1	-1.1222	-0.885046	1.4187	0.177688	1.26904	0.542447
121	CUST_24_PI380567544	DQ827720.1	DQ827720.1	-1.07466	-1.0207	0.948086	1.02526	0.829506	1.11316
122	CUST_534_PI380538646	zams24_O08_018	zams24_O08_018.ab1	-0.610331	-0.721181	0.525507	0.229811	0.53015	0.237789
123	CUST_6890_PI379238085	3501178_2	3501178_2	0.265675	0.206917	-0.148254	-0.104471	-0.142869	0
124	CUST_4232_PI379238085	3503631_1	3503631_1	-0.910015	-0.913987	0.798602	0.482452	0.739445	0.478566
125	CUST_262_PI380538644	zams20_I22_087	#N/A	0	0	0	0	0.107303	0
126	CUST_191_PI380538640	zams08_B10_047	Contig0245	0	0	0	0	0	0
127	CUST_5484_PI379238085	3495910_1	#N/A	0.661762	0.679467	-0.825781	-0.277404	-0.792469	-0.291423
128	CUST_2775_PI379238085	3505663_1	Contig0732	0.946772	0.921384	-1.07767	-1.33375	-1.09869	-1.3348
129	CUST_5346_PI379238085	3495954_1	Contig0349	-0.0968277	-0.0614862	0.138361	0.0184906	0.114244	0.0129865
130	CUST_4634_PI379238085	3499406_1	3499406_1	-0.0740448	-0.115484	-0.0416421	-0.0899732	-0.065591	-0.220323
131	(-)3xSLv1	NegativeControl	NegativeControl	0	0	0	0	0	0
132	CUST_4801_PI379238085	3498459_3	Contig0690_ext	-0.0589012	-0.0241234	0.0490132	-0.264281	-0.00250947	-0.275614
133	CUST_3873_PI379238085	3509277_1	3509277_1	-0.0530582	0.00916659	0.154309	0	0	0
134	CUST_8292_PI379238085	3503782_1	3503782_1	-0.688497	-0.561081	0.90892	0	0.724334	0
135	CUST_67_PI380538644	zams21_B09_047	Contig0568	0	0	0	0	0	0
136	RC7	RC7	RC7	0	0	0	0	0	0
137	CUST_317_PI380538646	zams24_O17_065	zams24_O17_065.ab1	0	0	-0.02867	0	-0.179798	-0.0114832
138	CUST_39_PI380567544	DQ827722.1	DQ827722.1	0	0	0	0	-0.0571216	-0.0975069
139	CUST_49_PI380567544	Ph_Wnt-B,	Ph_Wnt-B,	0	0	0	0	-0.194813	-0.13694
140	CUST_1093_PI379238085	3507049_2	3507049_2	0	0	0	0	-0.325278	0
141	CUST_100_PI380538638	zams04_C06_029	zams04_C06_029.ab1	0	0	0	0	-0.203161	0
142	CUST_174_PI380538644	zams18_K15_054	#N/A	0	0	0	0	-0.27135	-0.141918
143	CUST_9334_PI379238085	3501955_1	3501955_1	-0.147549	-0.444016	-0.0875135	-0.132649	-0.16052	-0.0451024
144	CUST_1608_PI379238085	3499482_1	3499482_1	-0.217569	-0.30439	0.314269	0.0536184	0.20258	0.165512
145	CUST_95_PI380538636	zams02_H12_042	Contig1000	-0.503443	-0.5556	0.580051	0.475544	0.435365	0.526001
146	CUST_6105_PI379238085	3505775_2	Contig0737_ext	0.624458	0.580896	-0.475522	0	-0.308133	0
147	CUST_250_PI379238089	zaFBplate1_K01_005.ab1	zaFBplate1_K01_005.ab1_R	-0.705315	-0.717007	0.954113	0.475939	0.912277	0.605158
148	CUST_103_PI380567544	Ph_GATA,	Ph_GATA,	0	0	0	0	-0.31149	0
149	CUST_7183_PI379238085	3496049_1	#N/A	0.38599	0.457257	-0.215516	-0.196319	-0.27529	-0.0896825
150	CUST_1881_PI379238085	3502427_2	3502427_2	-0.497299	0.100171	0	0	-0.16478	0
151	CUST_281_PI379238087	zaFBplate1_L02_005.ab1	Contig0864	0.93483	0.989517	-0.682766	-0.69177	-0.760434	-0.647242
152	CUST_2083_PI379238085	3501460_1	3501460_1	-0.691739	-0.790113	0.749467	0.400711	0.454976	0
153	CUST_3606_PI379238085	3504725_2	3504725_2	0.137219	0	0	0	0	0
154	CUST_7340_PI379238085	3510926_1	3510926_1	0.602401	0.196799	-0.788338	-0.814039	-0.766229	-0.330141
155	CUST_7789_PI379238085	3496372_1	3496372_1	-0.124995	-0.0950677	0.136167	0.190358	0.164801	0.16887
156	CUST_163_PI380538636	zams01_K21_085	Contig0465	0.0404051	0.0244136	0.0784163	-0.0530525	0.0550211	0.101264
157	CUST_287_PI380538636	zams02_M19_068	zams02_M19_068.ab1	-2.51407	-2.52205	2.63173	1.57539	2.79428	1.82107
158	CUST_6519_PI379238085	3496262_1	Contig0414	-0.112121	-0.154033	0.283764	0.471371	0.237031	0.696846
159	CUST_96_PI379238087	zaFBplate1_B20_080.ab1	zaFBplate1_B20_080.ab1_F	0	0	0	0	0	0
160	CUST_277_PI380538646	zams23_I20_072	zams23_I20_072.ab1	-0.79628	-1.15157	0.532814	0.260937	0.661735	0.299149
161	CUST_9208_PI379238085	3498936_2	Contig0726	1.90835	1.77312	-1.86321	-0.0657177	-1.72317	0
162	DarkCorner	DarkCorner	DarkCorner	0	0	0	-0.0370126	0	0
163	DarkCorner	DarkCorner	DarkCorner	0	0	0	-0.0379808	0	0
164	GE_BrightCorner	GE_BrightCorner	GE_BrightCorner	0.322482	0.334077	-0.0321923	-0.169357	-0.041757	-0.0467688
165	DarkCorner	DarkCorner	DarkCorner	0	0	0	0	0	0.00195039
166	DarkCorner	DarkCorner	DarkCorner	-0.0054677	0	0	0	0	0
167	CUST_452_PI380538640	zams08_K10_037	Contig0274_ext	-0.690869	-0.587285	0.825775	0	0.714464	0.187268
168	CUST_7017_PI379238085	3496738_3	Contig0493	2.24473	2.26317	-1.9818	0	-1.90911	0
169	CUST_86_PI380567544	Ph_midline,	Ph_midline,	0	0	0	0	0	0
170	CUST_3872_PI379238085	3496267_2	3496267_2	0.221109	0.0691528	-0.552663	0	-0.220728	0
171	CUST_2122_PI379238085	3501362_1	Contig0901	-0.884106	-0.87449	0.953156	0.602741	1.01741	0.739307
172	CUST_289_PI380538644	zams18_D13_061	Contig0074	0	0	0	0	-0.214904	0
173	CUST_510_PI380538644	zams20_P15_050	zams20_P15_050.ab1	-0.604323	-0.908424	0.724697	0	1.0051	0.241968
174	CUST_198_PI380538644	zams22_B14_063	zams22_B14_063.ab1	0	0	0	0	0	0
175	CUST_5816_PI379238085	3500149_1	Contig0802	-0.802605	-0.869405	1.08421	1.092	1.0916	1.23039
176	CUST_7216_PI379238085	3496965_1	Contig0530	1.73371	1.29025	-1.75345	0	-1.65259	0
177	CUST_9181_PI379238085	3500186_2	3500186_2	-0.692104	-0.586161	0.573297	0.266077	0.582746	0.160547
178	CUST_5995_PI379238085	3496087_1	#N/A	0.641799	0.682429	-0.48551	-1.03512	-0.461554	-0.940862
179	CUST_444_PI380538644	zams20_G09_041	Contig0199	-1.70224	-1.78494	1.70679	1.11378	1.70402	1.0997
180	CUST_141_PI380538646	zams22_E11_044	zams22_E11_044.ab1	0	0	0	0	-0.469638	0
181	CUST_6946_PI379238085	3501232_2	Contig0883	0.793892	0.941919	-0.594422	-1.05329	-0.607629	-0.817296
182	CUST_345_PI380538638	zams04_J16_056	Contig1000	-0.573617	-0.561213	0.571471	0.588785	0.57241	0.693672
183	CUST_147_PI380538636	zams03_P02_001	Contig0206	-1.85585	-1.69737	2.19679	0.950532	1.85421	1.00032
184	CUST_1723_PI379238085	3498981_1	3498981_1	0	0	0	0	0.157081	0
185	CUST_1731_PI379238085	3506901_1	#N/A	0.672355	0.689678	-0.640559	-0.488716	-0.650815	-0.376528
186	CUST_1232_PI379238085	3509511_1	Contig0114	0.554417	0.573809	-0.641326	-1.21498	-0.589832	-1.08069
187	CUST_3699_PI379238085	3496685_2	Contig0478	0.188446	0.248614	-0.243842	0.814586	-0.246153	0.613215
188	CUST_19_PI380567544	Ph_Wnt-Y,	Ph_Wnt-Y,	0.154201	0	0	0	0.136443	0
189	CUST_8754_PI379238085	3500079_3	3500079_3	-1.78962	-1.87253	1.86755	0.238269	1.59875	0.199733
190	CUST_5861_PI379238085	3505316_1	Contig0975	0.0952126	-0.185162	0.122836	0	0.11859	0
191	CUST_26_PI380538636	zams02_P04_002	Contig0489	0.227457	0.307147	-0.0712589	-0.0755517	-0.0473799	-0.0958161
192	CUST_394_PI380538640	zams07_F11_044	Contig0102	-1.04068	-0.959665	1.31606	0	1.14236	0.1169
193	CUST_263_PI379238089	zaFBplate1_O23_082.ab1	Contig0312	0	-0.107655	0	0	0	0
194	CUST_6163_PI379238085	3496426_1	3496426_1	-0.0792133	-0.0158246	0.0741117	-0.47163	0.0784416	-0.484215
195	CUST_8351_PI379238085	3496056_2	3496056_2	0.432623	0.82596	-1.05081	-0.251473	-0.7669	-0.477378
196	CUST_240_PI380538644	zams22_A18_079	zams22_A18_079.ab1	0	0	0	0	0	0
197	CUST_7265_PI379238085	3499581_1	Contig0775	0.864228	0.95329	-0.669967	-0.585545	-0.687255	-0.538996
198	CUST_5348_PI379238085	3501830_2	3501830_2	-1.31863	-1.07547	1.00225	0.345126	0.56034	0.306637
199	CUST_7911_PI379238085	3500105_1	3500105_1	0.0605163	0.118231	-0.168698	-0.244879	-0.143172	-0.280002
200	CUST_336_PI380538648	zamn05_J01_007	zamn05_J01_007.ab1	-1.39836	-1.10149	1.51057	0.446009	0.93182	0.430847
201	CUST_354_PI380538642	zams15_H16_058	Contig0729	0	0	0	0	0	0
202	CUST_171_PI380538648	zamn05_G02_009	Contig0081	0	0	0	0	-0.441322	0
203	CUST_6294_PI379238085	3499020_1	3499020_1	0.392725	0.236068	-0.231886	-0.249133	-0.197861	-0.363019
204	CUST_7_PI380567544	Ph_Wnt-A,	Ph_Wnt-A,	-0.11202	-0.141922	0.247838	0	0.109784	0
205	CUST_886_PI379238085	3505930_1	Contig0987	-0.0365972	-0.117005	-0.227677	0.424319	-0.260691	0.385879
206	CUST_442_PI380538650	zamn06_M21_083	Contig0069_ext	-0.181028	-0.106577	0.148727	0.150225	0.246466	0.10187
207	CUST_202_PI380538638	zams06_E11_044	#N/A	0.12111	0.0951225	-0.0491949	0.116368	-0.0600684	0.12671
208	CUST_4875_PI379238085	3502193_2	#N/A	0.997709	1.67945	-1.81774	0	-1.72055	0
209	CUST_309_PI380538640	zams10_M05_019	zams10_M05_019.ab1	0	-0.246268	0	0	0	0
210	CUST_586_PI379238085	3504574_2	3504574_2	-0.418783	-0.289782	0.13759	-0.54872	0.166832	-0.547269
211	CUST_39_PI380567544	DQ827722.1	DQ827722.1	0	0	0	0	0	-0.0940605
212	CUST_140_PI379238087	zaFBplate1_O05_017.ab1	zaFBplate1_O05_017.ab1_F	-0.963712	-0.417415	0.924217	0	0.778081	0
213	CUST_27_PI379238089	zaFBplate1_A17_079.ab1	zaFBplate1_A17_079.ab1_R	0.314894	-0.227031	0	0	0.0272589	-0.300704
214	CUST_202_PI380538648	zamn04_N07_020	#N/A	0	0	0	0	0	0
215	CUST_503_PI379238085	3499080_1	3499080_1	0	-0.118389	0	0	0	-0.0881391
216	CUST_1765_PI379238085	3506295_1	3506295_1	-0.363398	-0.871675	0.269396	0.103523	0.29894	-0.0816772
217	CUST_1073_PI379238085	3498001_1	Contig0970	-0.0290249	-0.0446201	-0.0372811	0.242885	-0.0582078	0.0288824
218	CUST_5805_PI379238085	3495829_6	Contig0327	0.0642246	0.115992	-0.220716	0.212108	-0.177614	-0.0468866
219	CUST_2454_PI379238085	3498203_1	3498203_1	1.40525	1.36871	-1.33214	-1.27561	-1.29194	-0.984195
220	CUST_6754_PI379238085	3497364_2	Contig0581	0.247817	0.218004	-0.325748	-0.803374	-0.324209	-0.635002
221	CUST_1230_PI379238085	3509511_2	3509511_2	0.528497	0.246191	-0.631464	0	-0.298256	-0.103783
222	CUST_8490_PI379238085	3497393_2	3497393_2	-0.328955	-0.320402	0.444238	-0.198982	0.377479	-0.119382
223	CUST_4683_PI379238085	3498820_2	Contig0716	1.18428	1.16537	-1.1377	0	-1.00399	0
224	CUST_259_PI380538638	zams05_K15_054	Contig0266_ext	0	0	0	0	-0.303401	0
225	CUST_6_PI380538648	zamn03_D15_062	Contig0959	-0.488181	0	0	0	-0.234467	0
226	CUST_5978_PI379238085	3510513_1	3510513_1	0.243498	0.270494	-0.168877	-0.420294	-0.170509	-0.391122
227	CUST_177_PI380538642	zams15_P05_017	zams15_P05_017.ab1	0.0678996	0.053564	-0.152867	-0.275324	-0.130529	-0.0621674
228	CUST_2239_PI379238085	3498458_1	Contig0689	0.0975752	0.151979	-0.0716823	-0.107976	-0.105679	-0.0522094
229	CUST_9307_PI379238085	3497412_3	3497412_3	0.145689	-0.278734	0	0	-0.239255	0
230	CUST_8456_PI379238085	3497007_1	Contig0361_ext	0.245965	-0.131283	0.386809	0	-0.298028	0
231	CUST_5402_PI379238085	3504824_2	3504824_2	0	0	0	0	-0.291464	0
232	CUST_98_PI380538636	zams02_A01_015	zams02_A01_015.ab1	0.0445874	0	0	0	-0.408841	0
233	CUST_8394_PI379238085	3507023_2	3507023_2	0.185871	0.267145	0.0193604	0	-0.00283279	0
234	CUST_2663_PI379238085	3501234_1	3501234_1	-0.183261	-0.135356	0.310196	0.178132	0.204861	0.261143
235	CUST_223_PI380538640	zams08_F03_012	#N/A	0	0	0	0	0	0
236	CUST_60_PI380538646	zams23_K15_054	#N/A	-0.74815	-0.568404	0.71419	0.0233994	0.251905	0
237	CUST_4424_PI379238085	3496089_2	3496089_2	-0.0620562	-0.093175	0.236443	0.610917	0.215056	0.561349
238	CUST_460_PI380538648	zamn06_C06_029	zamn06_C06_029.ab1	0	0	0	0	0	0
239	(-)3xSLv1	NegativeControl	NegativeControl	0	0.0459717	0	0	0	0
240	CUST_299_PI379238085	3496255_5	Contig0412	-0.474926	-0.475928	0.588774	0.500012	0.574921	0.811387
241	CUST_3266_PI379238085	3496593_3	3496593_3	0.0916339	0	0	0	0	0
242	CUST_5752_PI379238085	3501803_1	3501803_1	-0.399512	-0.0190426	0	0	-0.0945299	0
243	CUST_1632_PI379238085	3508806_1	3508806_1	-0.0659328	-0.047445	-0.00556885	-0.442532	-0.031963	-0.292066
244	CUST_8639_PI379238085	3498083_1	3498083_1	-0.282428	-0.186405	0.405469	0.399591	0.381114	0.570445
245	DarkCorner	DarkCorner	DarkCorner	0	0	0	0	0	0
246	DarkCorner	DarkCorner	DarkCorner	0	0	0	-0.164704	0	0
247	DarkCorner	DarkCorner	DarkCorner	0	0	0	0	0	-0.318827
248	CUST_1587_PI379238085	3508450_2	3508450_2	0	0.201494	-0.645086	-0.356469	-0.602136	-0.4908
249	CUST_4_PI380567544	DQ827723.1	DQ827723.1	0.354408	0.306952	-0.315843	-0.11893	-0.325276	-0.0237844
250	CUST_75_PI379238089	zaFBplate1_F04_012.ab1	Contig0305	-0.169801	-0.0591322	-0.174387	-0.763079	-0.162843	-0.711116
251	CUST_292_PI380538642	zams16_N12_036	zams16_N12_036.ab1	0	0.0631724	-0.316798	0	-0.258069	0
252	CUST_9223_PI379238085	3499122_1	#N/A	-0.261908	-0.201872	0.23071	0.256355	0.337464	0.307465
253	CUST_338_PI380538648	zamn05_L20_070	zamn05_L20_070.ab1	0	0	0	0	-0.23845	0
254	CUST_9121_PI379238085	3497307_2	3497307_2	0.220525	0.325654	-0.379699	0	-0.32278	0
255	CUST_9130_PI379238085	3504995_2	3504995_2	-0.803177	-0.902214	1.05304	0.399018	0.879842	0.52035
256	CUST_2734_PI379238085	3499530_1	3499530_1	-1.1603	-0.974479	1.20528	0.859863	1.23643	0.86145
257	CUST_5196_PI379238085	3498994_2	Contig0732	1.03597	1.04124	-1.15686	-1.11666	-1.21015	-1.00818
258	CUST_33_PI380567544	Ph_Wnt-Gr3,	Ph_Wnt-Gr3,	0.227948	0.217471	-0.558829	0	-0.211603	0
259	CUST_7185_PI379238085	3506398_2	3506398_2	0.168821	-0.0383947	-0.248952	0	0.123307	0
260	CUST_5439_PI379238085	3503677_1	3503677_1	-0.599097	-0.785132	0.678708	0.116396	0.596968	0.197842
261	CUST_442_PI380538646	zams24_M12_036	zams24_M12_036.ab1	0.116092	0.120073	-0.120522	0.113152	-0.0671698	0
262	CUST_119_PI380567544	Ph_PL10,	Ph_PL10,	-0.421879	-0.441062	0.49535	0	0.38912	0
263	CUST_2178_PI379238085	3508398_2	3508398_2	-0.709127	-0.87264	1.0346	0.126678	1.34045	0.348726
264	CUST_28_PI379238085	3496824_1	#N/A	-0.0510203	0.0710071	0.11998	0.193846	0.101308	0.223557
265	CUST_508_PI380538640	zams10_F18_075	Contig0189	0.47258	0.560526	-0.445589	-0.460249	-0.399481	-0.414724
266	CUST_1967_PI379238085	3496484_1	3496484_1	-0.104816	-0.0134658	0.173832	0	0	0
267	CUST_8084_PI379238085	3501268_3	Contig0886	-0.0542131	0.00192471	0.208416	0.01927	0.238019	0.0953803
268	CUST_67_PI380538640	zams08_I18_071	zams08_I18_071.ab1	0	-0.0900963	0	0	0	0
269	CUST_3239_PI379238085	3504459_1	3504459_1	-1.04437	-0.910154	1.08943	0	0.862841	0
270	CUST_1571_PI379238085	3497052_2	Contig0542	0.695742	0.350141	-0.470313	0	-0.331878	0
271	CUST_7928_PI379238085	3506244_2	3506244_2	-0.542503	-0.60238	0.684395	0.621687	0.67773	0.676123
272	CUST_9118_PI379238085	3498000_2	3498000_2	0.215965	0.117423	-0.222523	0.0865092	-0.14254	0
273	CUST_128_PI380538640	zams08_P09_033	zams08_P09_033.ab1	0.151811	0.118046	0	0	-0.126894	0
274	CUST_2449_PI379238085	3503794_1	Contig0961	1.11918	0.985633	-1.09392	-0.72185	-0.948148	-0.656448
275	CUST_32_PI380567544	Ph_Wnt-Gr3,	Ph_Wnt-Gr3,	0	0.136509	0	0	-0.411585	0
276	CUST_26_PI380567544	DQ917572.1	DQ917572.1	0.0565094	-0.0178823	0.195083	0	0.0889584	0
277	(-)3xSLv1	NegativeControl	NegativeControl	0	0	0	0	-0.10966	0
278	CUST_372_PI380538640	zams08_J23_088	zams08_J23_088.ab1	0	0	0	0	0	0
279	CUST_3603_PI379238085	3497014_2	#N/A	0.0699185	0.0995502	-0.214807	-0.0779291	-0.20349	-0.124714
280	CUST_7871_PI379238085	3499677_2	3499677_2	0.475501	0.495115	-0.522733	-0.48557	-0.478992	-0.447091
281	CUST_3395_PI379238085	3509149_2	Contig0364	0.0658839	0.132267	-0.0380499	0.114945	-0.045978	0.0985776
282	CUST_5419_PI379238085	3509483_2	3509483_2	0	-0.103803	-0.228288	0	-0.221966	0
283	CUST_2624_PI379238085	3500208_1	3500208_1	-0.264488	-0.238102	0.204423	0.204018	0.212707	0.204162
284	CUST_226_PI379238085	3501547_1	Contig0928	0.240367	0.275494	-0.206376	0.13709	-0.1934	0.111062
285	CUST_254_PI380538644	zams18_B16_064	#N/A	0.092166	-0.171154	-0.269796	0	-0.463397	-0.0557596
286	CUST_124_PI380567544	DQ917573.1	DQ917573.1	1.06199	0.618084	-0.75875	0	-0.561428	0
287	CUST_1530_PI379238085	3496026_5	#N/A	-0.440828	-0.364643	0.530539	0.482641	0.511348	0.453473
288	CUST_273_PI379238085	3496709_1	3496709_1	1.81267	1.7628	-1.88517	-0.295176	-1.84157	-0.482844
289	CUST_873_PI379238085	3497957_1	Contig0639	-0.307534	-0.245681	0.395271	0.77677	0.380562	0.715986
290	CUST_95_PI380538638	zams06_O19_066	zams06_O19_066.ab1	0	0	0	0	0	0
291	CUST_2630_PI379238085	3495865_4	Contig0333	1.00727	1.03709	-0.773139	-1.29804	-0.787547	-1.22517
292	CUST_10_PI379238087	zaFBplate1_H16_058.ab1	zaFBplate1_H16_058.ab1_F	-0.019422	-0.03786	0.252061	-0.0666254	0.249555	-0.0688416
293	CUST_2012_PI379238085	3496409_1	#N/A	0.11556	0.107666	-0.17502	0.0661276	-0.206312	0.00706202
294	CUST_6258_PI379238085	3501488_1	3501488_1	-0.196475	-0.246811	0.135648	1.27131	0.109892	0.862662
295	CUST_330_PI380538646	zams24_D10_045	zams24_D10_045.ab1	0	0	0.012068	0	0	-0.379948
296	CUST_7294_PI379238085	3498286_2	3498286_2	-0.449453	-0.178769	0.773514	0.124723	0.470131	-0.321929
297	CUST_377_PI380538642	zams16_L24_086	Contig0668_ext	-0.138651	-0.243831	0.269466	0.34314	0.22424	0.130002
298	CUST_756_PI379238085	3496137_4	Contig0390	-0.411009	-0.477377	0.427015	0.110635	0.379027	0.0774241
299	CUST_39_PI380538642	zams14_P06_017	Contig0735_ext	-0.126937	-0.086345	0.285068	0.286661	0.244655	0.313459
300	CUST_162_PI379238085	3505044_1	3505044_1	-0.715733	-0.698733	0.570459	0	0.641368	-0.0467625
301	CUST_177_PI380538640	zams08_K01_005	zams08_K01_005.ab1	0	0	0	0	0.0618961	-0.278639
302	CUST_1760_PI379238085	3501712_1	3501712_1	-1.66106	-1.59195	1.82826	0.878436	0.76829	0.894166
303	CUST_275_PI380538640	zams11_M17_067	Contig0219	-0.895866	-0.660019	0.872	0	0.0843861	0.0242723
304	CUST_2914_PI379238085	3509994_1	3509994_1	1.78591	1.57007	-1.5089	0	-0.629259	0
305	CUST_2126_PI379238085	3499680_1	3499680_1	0	0	0	0	-0.25444	0
306	CUST_6481_PI379238085	3502108_2	3502108_2	-0.681008	-0.828597	0.924396	0	-0.120365	0
307	CUST_220_PI380538642	zams16_P11_034	zams16_P11_034.ab1	-2.39901	-2.66339	2.1091	1.46088	1.27618	1.4526
308	CUST_870_PI379238085	3497957_3	Contig0639	0.274899	0.240948	-0.398625	0.398964	-0.383062	0.514669
309	CUST_429_PI379238085	3496899_1	3496899_1	0.425692	0	-0.341507	0	-0.391696	0
310	CUST_4686_PI379238085	3498820_1	Contig0716	1.17267	1.1249	-1.13336	0	-0.960494	0
311	CUST_8615_PI379238085	3498613_1	3498613_1	0	0	0	0	-0.334132	0
312	CUST_5881_PI379238085	3510320_1	3510320_1	0.53067	0.54717	-0.298769	0	-0.337509	0
313	CUST_417_PI380538644	zams19_C08_030	Contig0111	-0.738074	-0.608091	0.608077	0.346125	0.0489531	0
314	CUST_6009_PI379238085	3499157_1	3499157_1	-1.22404	-1.41017	1.70787	1.01137	0.672946	1.0226
315	CUST_6359_PI379238085	3508950_2	3508950_2	0	0	0	0	-0.478122	0
316	CUST_286_PI380538636	zams03_A22_095	zams03_A22_095.ab1	-0.389984	-0.341577	0.703605	0	0.357962	0
317	CUST_738_PI379238085	3510540_1	3510540_1	-0.954281	-1.13516	1.0658	0.422665	0.950101	0.623555
318	CUST_8217_PI379238085	3497088_4	3497088_4	0.561259	0	-0.596118	0	-0.382442	0
319	CUST_3683_PI379238085	3504097_2	#N/A	0	0	0	0	0	0
320	CUST_30_PI379238087	zaFBplate1_G20_074.ab1	Contig0305	0	0	-0.168264	0	0	0
321	CUST_6814_PI379238085	3502601_2	3502601_2	0.301957	0.31045	-0.362227	-0.686372	-0.351794	-0.984714
322	CUST_441_PI380538640	zams10_E21_091	Contig0156	0.460692	0.44254	-0.44411	-0.565763	-0.570261	-0.449268
323	CUST_86_PI380538638	zams06_B09_047	Contig0552	0.0805126	0	-0.0848125	0	0	0
324	CUST_8594_PI379238085	3497488_3	Contig0592	-0.205306	-0.338953	0.230702	-0.0301289	0.18307	0
325	CUST_228_PI379238085	3499941_1	Contig0792	-0.0786472	-0.153279	0.0802392	0.138555	0.162328	0.439008
326	CUST_360_PI380538650	zamn07_G10_041	zamn07_G10_041.ab1	0	0	0	0	0	0
327	DarkCorner	DarkCorner	DarkCorner	0	0	0	0	0	0
328	DarkCorner	DarkCorner	DarkCorner	0	0	0	-0.202008	0	0
329	DarkCorner	DarkCorner	DarkCorner	0	0	0	0	0	0.0544511
330	CUST_20_PI380538642	zams16_F11_044	#N/A	0	0	0	0	0	-0.107312
331	CUST_41_PI380567544	Ph_tinman,	Ph_tinman,	0	0.39725	0	0	0	0.136751
332	CUST_482_PI380538650	zamn05_F01_011	Contig1001	-1.47266	-1.40643	1.45057	1.26101	1.49443	1.28285
333	CUST_3536_PI379238085	3496926_4	Contig0524	0.482607	0.510372	-0.412936	-0.0285364	-0.393407	-0.00910684
334	CUST_295_PI380538644	zams21_L07_022	#N/A	-0.263111	-0.149953	0.462957	-0.602288	0.470332	-0.596051
335	(-)3xSLv1	NegativeControl	NegativeControl	0	0	-0.298775	0	0	0
336	CUST_7735_PI379238085	3505286_1	Contig0535	1.14713	1.16923	-0.955968	-1.4334	-0.955916	-1.26448
337	CUST_2828_PI379238085	3496673_2	3496673_2	-0.074009	-0.14838	-0.00917481	0.108708	-0.0628848	0.195373
338	CUST_113_PI380538646	zams23_J22_087	#N/A	0	0	0	0	0	0
339	CUST_7605_PI379238085	3501317_1	Contig0894	0.780452	0.959202	-0.660272	-1.19089	-0.678121	-1.09811
340	CUST_1657_PI379238085	3496822_1	3496822_1	0.377292	0.438101	-0.476039	0	-0.389827	0
341	CUST_8162_PI379238085	3498311_8	Contig0678	0.579222	0.651491	-0.553007	-0.10315	-0.54712	0.0291207
342	CUST_6381_PI379238085	3497454_1	3497454_1	-0.232614	-0.279602	0.448185	0.562364	0.447678	0.630843
343	CUST_6_PI379238085	3496392_1	3496392_1	-0.127239	-0.085103	-0.0481681	-0.182495	-0.0205795	0.0921499
344	CUST_175_PI379238087	zaFBplate1_L13_053.ab1	Contig0311	0.357041	0.348469	-0.278238	-0.0377259	-0.189481	-0.0489181
345	CUST_172_PI380538644	zams21_F05_027	zams21_F05_027.ab1	-0.202724	0.172512	0.0355347	0	-0.173233	0
346	CUST_7747_PI379238085	3502270_1	3502270_1	0.43396	0	0	0	-0.119538	0
347	CUST_36_PI380567544	DQ827722.1	DQ827722.1	0	0	0	0	0	0
348	CUST_3076_PI379238085	3497707_4	3497707_4	0.194186	0.205884	-0.230164	-0.357197	-0.124189	-0.0515063
349	CUST_134_PI380538642	zams17_N10_035	Contig0676	-0.67329	-0.595545	0.72481	0.263099	0.70782	0.285962
350	CUST_126_PI380538636	zams02_M21_083	zams02_M21_083.ab1	0	0	0	0	0	0
351	CUST_111_PI380538642	zams17_I18_071	Contig0741	0.216836	0.327112	-0.239958	-0.0241982	-0.229318	-0.023545
352	CUST_1879_PI379238085	3510447_2	Contig1038_ext	1.00682	0.665099	-1.19663	-0.137956	-0.858287	0
353	CUST_8499_PI379238085	3499490_1	3499490_1	1.80535	1.89924	-2.0446	0	-1.33637	0
354	CUST_346_PI379238085	3496588_1	Contig0467	0.148024	0.231557	-0.139207	0.0589354	-0.0763531	-0.00118942
355	CUST_451_PI380538650	zamn01_G01_009	Contig0290	-0.638246	-0.574797	0.697276	0.4069	0.769641	0.395254
356	CUST_2187_PI379238085	3501264_1	Contig0885	0.657765	0.565001	-0.576709	-0.393575	-0.540259	-0.277206
357	CUST_4273_PI379238085	3498198_4	3498198_4	1.71157	1.79772	-1.52075	-2.1393	-1.47947	-2.05312
358	CUST_217_PI379238089	zaFBplate1_L05_021.ab1	zaFBplate1_L05_021.ab1_R	0.0345366	0.0316332	0.35505	0	0.0516102	0
359	CUST_5280_PI379238085	3501173_2	Contig0874	-0.0220983	0.0700821	0.116615	0.634573	0.158122	0.597105
360	CUST_1597_PI379238085	3497461_1	Contig0587	0.138428	0.119814	-0.044591	1.211	-0.0325123	1.22592
361	CUST_3713_PI379238085	3499146_1	Contig0749	0.462976	0.507004	-0.270742	0.165456	-0.295113	0.0773117
362	CUST_6878_PI379238085	3500383_2	Contig0819	1.20333	1.31888	-1.19593	-1.50036	-1.15917	-1.55617
363	CUST_1844_PI379238085	3499425_2	Contig0768	-0.113673	-0.0954804	0.229029	0.132319	0.263424	0.0891465
364	CUST_157_PI379238087	zaFBplate1_B17_079.ab1	Contig0921	0.412793	0.500121	-0.239034	0.0778026	-0.229575	0.0390091
365	CUST_5190_PI379238085	3498154_1	3498154_1	0.416255	0.386949	-0.451929	-0.481152	-0.481572	-0.507501
366	CUST_13_PI380567544	DQ917570.1	DQ917570.1	-1.10723	-0.921136	1.00786	0.599095	0.755343	0.372791
367	CUST_8992_PI379238085	3502178_1	Contig0557_ext	-0.395291	-0.101481	0.0108065	0	0.0663168	0
368	CUST_3240_PI379238085	3504459_1	3504459_1	-1.05694	-1.03024	0.74359	0.0326694	0.892529	0
369	CUST_336_PI380538638	zams06_N14_051	zams06_N14_051.ab1	0	0	0	0	-0.271265	0
370	(+)E1A_r60_3	E1A_r60_3	E1A_r60_3	0.430536	0.418478	0.531568	0.551094	0.550436	0.385088
371	CUST_32_PI380567544	Ph_Wnt-Gr3,	Ph_Wnt-Gr3,	0	0	0	0	-0.449474	-0.185099
372	CUST_7780_PI379238085	3497012_2	3497012_2	-0.371229	-0.468776	-0.290299	0	0	0
373	CUST_1330_PI379238085	3498775_1	3498775_1	-1.14369	-1.42145	1.63612	0.652636	1.6807	0.435496
374	CUST_6271_PI379238085	3496790_1	3496790_1	0.3114	0.252142	-0.202578	-0.100556	-0.218341	-0.118714
375	CUST_1463_PI379238085	3498633_1	3498633_1	0.953925	0.769447	-1.24874	0	-0.697961	-0.214357
376	CUST_4259_PI379238085	3502484_2	3502484_2	-0.413646	-0.125318	0.682135	0	0.505824	-0.167083
377	CUST_5_PI380567544	DQ827723.1	DQ827723.1	0.31798	0.246254	-0.318112	-0.144583	-0.280261	-0.186164
378	CUST_2658_PI379238085	3501310_2	#N/A	0.649061	0.692368	-0.62947	0.894375	-0.700689	0.610557
379	CUST_106_PI380538646	zams25_G05_025	#N/A	-0.382509	-0.0567387	-0.0462281	0	-0.264329	-0.220657
380	CUST_6576_PI379238085	3501778_1	Contig0610_ext	2.11018	2.14046	-2.02268	0	-2.09623	-0.188341
381	CUST_524_PI380538640	zams08_J19_072	Contig0199	-1.61817	-1.95529	1.56671	0.883498	1.62911	0.699859
382	CUST_285_PI380538644	zams19_O01_001	zams19_O01_001.ab1	0	0	0	0	0	0.110399
383	CUST_4837_PI379238085	3497464_1	Contig0588	1.18099	0.916462	-1.42747	0	-1.29626	0.0163511
384	CUST_259_PI380538648	zamn03_M02_003	Contig0054	0.097035	0	0	0	0.278564	0.134903
385	CUST_86_PI380567544	Ph_midline,	Ph_midline,	0	0	0	0	-0.0973018	0
386	CUST_717_PI379238085	3497208_2	3497208_2	-0.144786	-0.120768	0.259301	0.261533	0.189339	0.316325
387	CUST_54_PI379238089	zaFBplate1_F02_011.ab1	zaFBplate1_F02_011.ab1_R	0	0	0	0	-0.257284	0
388	CUST_254_PI379238087	zaFBplate1_A24_096.ab1	zaFBplate1_A24_096.ab1_F	-0.116124	-0.195294	0.018952	0	-0.289847	0
389	CUST_72_PI380538636	zams01_F20_076	Contig0676	-0.559351	-0.512394	0.674935	0.219864	0.356933	0.525937
390	CUST_23_PI380538644	zams20_H14_057	#N/A	-0.148597	-0.0352385	0	0	-0.294367	0
391	CUST_3099_PI379238085	3495996_1	Contig0363	-0.202343	-0.161835	0.380553	0.459642	0.31509	0.500979
392	CUST_424_PI380538648	zamn04_E05_027	#N/A	-0.231663	0.29723	0	0	-0.18445	0
393	CUST_294_PI379238089	zaFBplate1_G22_089.ab1	zaFBplate1_G22_089.ab1_R	-0.743773	-0.888452	0.77007	0.649149	0.236483	0.468355
394	CUST_273_PI380538636	zams02_N17_067	Contig0900	0.760696	0.733655	-0.43379	-0.122157	-0.488187	-0.0474919
395	CUST_292_PI380538644	zams21_M06_019	Contig0568_ext	0.0587425	0.121582	0.193057	0.295684	0.154769	0.428075
396	CUST_291_PI380538646	zams24_F22_091	#N/A	0.164091	0.13125	0.0721002	0.0144908	-0.173551	0
397	CUST_5602_PI379238085	3496273_1	Contig0417	0.265876	0.208249	-0.265364	-0.579107	-0.236102	-0.480254
398	CUST_2586_PI379238085	3506445_1	3506445_1	-0.258878	0	0	0	-0.168469	0
399	CUST_5279_PI379238085	3501173_2	Contig0874	0.0694765	-0.0619808	-0.0827764	0.468354	-0.0432303	0.312673
400	CUST_105_PI380538636	zams01_P12_034	Contig0118	0	-0.306807	0	0	0	0
401	CUST_3082_PI379238085	3500922_1	3500922_1	0.265486	0.218352	-0.242429	-0.148614	-0.231231	0.00998193
402	CUST_1173_PI379238085	3496878_1	Contig0517	-0.295018	-0.255477	0.255682	0.331612	0.231301	0.493136
403	CUST_30_PI380538640	zams08_N08_020	zams08_N08_020.ab1	0	0.0654643	0	0	0	0
404	CUST_3505_PI379238085	3507439_1	Contig1006	-1.15504	-1.15723	1.30676	1.70065	1.41847	1.84294
405	CUST_8241_PI379238085	3507029_2	3507029_2	0.203757	0.187293	-0.0480954	0.333687	-0.0357746	0.670718
406	(+)eQC-41	EQC	EQC	0	0	0	0	0	0
407	CUST_4291_PI379238085	3500365_2	3500365_2	0	0	0	0	0	0
408	CUST_4790_PI379238085	3509448_2	3509448_2	0	0	0	0	0	0
409	CUST_511_PI380538646	zams25_O19_066	zams25_O19_066.ab1	0	0	0	0	0	0
410	DarkCorner	DarkCorner	DarkCorner	0.351763	0	0	0	0	0
411	CUST_2081_PI379238085	3497681_3	3497681_3	0.170454	0.192672	0.123651	0.817848	0.101234	0.741454
412	CUST_477_PI380538648	zamn02_J20_072	Contig0713	-0.323526	-0.226099	0.3903	0.532721	0.412219	0.542905
413	CUST_284_PI380538650	zamn03_L23_086	zamn03_L23_086.ab1	-0.194538	0.109928	0	0	0	0
414	CUST_358_PI379238085	3501416_1	3501416_1	1.32119	1.11701	-1.53762	0	-1.39778	0
415	CUST_229_PI379238089	zaFBplate1_B04_016.ab1	zaFBplate1_B04_016.ab1_R	-1.20845	-1.06975	1.23349	1.38975	1.26553	1.2544
416	CUST_1380_PI379238085	3496225_2	Contig0403	-0.274579	-0.235514	0.337586	0.250443	0.321487	0.479506
417	CUST_4187_PI379238085	3506291_2	Contig0993	-0.319753	-0.360394	0.235939	0.390452	0.217308	0.484921
418	CUST_366_PI380538636	zams03_E20_076	#N/A	1.12233	0.766901	-1.18082	0	-0.854063	0
419	CUST_217_PI380538642	zams16_F20_076	#N/A	0.168335	0	0	0	-0.430089	0
420	CUST_8306_PI379238085	3496078_3	#N/A	0.497944	0.558445	-0.455325	-0.0210865	-0.474198	0.338158
421	CUST_2796_PI379238085	3496264_5	3496264_5	1.02663	1.01767	-0.964119	0	-0.904577	0
422	CUST_986_PI379238085	3495816_3	3495816_3	-0.354077	-0.249372	0.251575	0.469205	0.134283	0.731521
423	CUST_81_PI380538642	zams14_C16_062	Contig0245	0	0	0	0	-0.181345	0
424	CUST_30_PI380538648	zamn01_N15_052	zamn01_N15_052.ab1	0	0	0	0	0.141017	0
425	CUST_98_PI379238085	3499342_1	3499342_1	-0.676149	-0.621062	0.741645	0.474877	0.509413	0.548055
426	CUST_1392_PI379238085	3496989_2	3496989_2	-1.17946	-0.700247	0.814138	-0.204297	0.0917469	-0.204916
427	CUST_6695_PI379238085	3503716_1	3503716_1	0	0.26051	0	0	-0.280318	0
428	CUST_2074_PI379238085	3505332_1	3505332_1	0.0348465	0.113483	-0.21474	-0.657145	-0.236407	-0.641673
429	CUST_9244_PI379238085	3501720_1	3501720_1	0	0	0	0	0	0
430	CUST_2860_PI379238085	3507564_1	Contig1009	-0.920266	-0.968974	0.731585	0.495575	0.752509	0.365829
431	CUST_137_PI379238085	3497223_5	3497223_5	0	0	0	0	0	0
432	CUST_488_PI380538644	zams18_I16_056	Contig0558	-0.359823	0.15956	0	0	0.146356	0
433	CUST_8104_PI379238085	3498614_1	Contig0698	0.695473	0.83752	-0.665767	-0.988526	-0.628761	-0.930454
434	CUST_4171_PI379238085	3500076_2	3500076_2	2.45221	2.50672	-2.28423	0	-2.24732	0
435	CUST_5066_PI379238085	3504550_2	3504550_2	0.376335	0	0	0	-0.251893	0
436	CUST_1181_PI379238085	3505392_2	Contig0978	1.18267	1.33561	-1.22696	-0.766293	-1.13644	-0.688596
437	CUST_193_PI380538646	zams24_I06_023	zams24_I06_023.ab1	0	0.337625	0	0	0	0
438	CUST_7853_PI379238085	3498727_2	Contig0710	0.37968	0	-0.111574	0	-0.262227	0
439	CUST_223_PI379238087	zaFBplate1_D18_077.ab1	zaFBplate1_D18_077.ab1_F	-0.50241	-0.463626	0.342132	0.0153108	0.367809	0.0161922
440	CUST_7512_PI379238085	3500873_2	Contig0850	-0.0615995	0.0295026	0.0773176	0.341899	0.0588916	0.33461
441	CUST_1118_PI379238085	3509986_2	3509986_2	0.96749	0.971101	-1.10404	-0.0401498	-0.553895	0
442	CUST_1974_PI379238085	3505021_1	3505021_1	-0.553845	-1.01357	0.336797	0.109262	-0.128355	0
443	CUST_3280_PI379238085	3501852_2	3501852_2	0.282211	0	-0.126352	0	-0.104649	0
444	CUST_2905_PI379238085	3508590_2	3508590_2	-0.767549	-0.709551	0.768884	0	0.804726	0
445	CUST_264_PI380538642	zams15_C19_078	#N/A	-0.0964192	-0.0453099	0.103614	-0.00252202	0.114974	-0.0477856
446	CUST_3689_PI379238085	3505577_1	3505577_1	-0.879326	-0.219953	1.1526	0	1.01897	0
447	CUST_3547_PI379238085	3500629_1	Contig0835	1.87005	1.66812	-1.83981	0	-1.86622	0
448	CUST_2_PI380538642	zams16_I03_008	#N/A	0	0.244302	0	0	-0.382736	0
449	CUST_6043_PI379238085	3500684_6	Contig0840_ext	2.25896	2.26061	-2.06652	-2.54717	-2.02071	-1.93884
450	CUST_3727_PI379238085	3495868_1	3495868_1	0.598661	0.598355	-0.624096	-0.345081	-0.686038	-0.304042
451	CUST_2300_PI379238085	3496248_1	3496248_1	1.10038	1.14198	-0.981932	-0.208778	-0.970174	-0.24605
452	CUST_4_PI380567544	DQ827723.1	DQ827723.1	0.279349	0.281545	-0.312006	-0.159656	-0.28078	-0.209812
453	CUST_263_PI379238087	zaFBplate1_O23_082.ab1	Contig0312	-2.36147	-2.08031	2.43958	0.778394	2.45401	0.731313
454	CUST_2317_PI379238085	3497781_2	3497781_2	0	0	0	0	0	-0.332124
455	CUST_336_PI380538640	zams11_K10_037	#N/A	0	0.136201	0	0	0	-0.177001
456	CUST_3067_PI379238085	3498400_1	Contig0687	0.22708	0.240449	-0.810295	-0.822905	-0.639497	-0.710795
457	CUST_311_PI380538650	zamn07_J10_039	zamn07_J10_039.ab1	0	-0.0579296	0	0	0	-0.303058
458	CUST_1606_PI379238085	3501164_1	3501164_1	0	0.256526	0	0	-0.326467	-0.11042
459	CUST_7919_PI379238085	3498347_1	3498347_1	-1.60452	-1.52481	1.72583	1.2237	1.73798	1.14363
460	CUST_2211_PI379238085	3498889_1	3498889_1	0.215024	0	-0.236482	0	0	-0.146452
461	CUST_468_PI379238085	3497028_2	3497028_2	2.59112	2.70702	-2.68205	0	-2.69214	0
462	CUST_2859_PI379238085	3507564_1	Contig1009	-0.921858	-1.22144	0.811648	0.662196	0.96612	0.330697
463	CUST_69_PI379238087	zaFBplate1_I02_007.ab1	Contig0307	-1.9373	-1.8546	2.12212	1.30483	2.12436	1.29796
464	(-)3xSLv1	NegativeControl	NegativeControl	0	0	0	0	0	0
465	CUST_7712_PI379238085	3495799_3	Contig0320	0.247768	0.106152	-0.256745	0	0	0
466	(+)E1A_r60_a135	E1A_r60_a135	E1A_r60_a135	-0.304096	-0.253841	-0.0880932	-0.208411	-0.105386	-0.132917
467	CUST_233_PI380538650	zamn01_L09_037	zamn01_L09_037.ab1	-0.0381279	0	0	0	-0.12211	0
468	CUST_160_PI380538640	zams09_G23_090	zams09_G23_090.ab1	0	0	0	0	-0.216626	0
469	CUST_7873_PI379238085	3510859_2	3510859_2	0	0	-0.137718	0	-0.248662	0
470	CUST_562_PI380538642	zams15_N18_067	#N/A	0	0	0	0	-0.22885	0
471	RC6	RC6	RC6	0	0	0	0	-0.259931	0
472	CUST_7046_PI379238085	3505176_2	3505176_2	0.267931	0.0708364	-0.19203	0	-0.245971	0
473	CUST_5788_PI379238085	3499591_1	3499591_1	-0.103877	-0.131268	0.00753698	-0.725604	-0.0406391	-0.781915
474	CUST_5683_PI379238085	3500287_1	3500287_1	-0.052046	-0.0773604	-0.140659	0	-0.253606	0
475	CUST_3802_PI379238085	3496872_2	Contig0516	-0.26715	-0.301206	0	0	-0.207731	0
476	CUST_125_PI380538648	zamn05_G03_010	Contig0007	0.486659	0.51077	-0.384284	-0.604198	-0.405025	-0.523344
477	CUST_61_PI380567544	Ph_nanos,	Ph_nanos,	-0.155323	0	0	0	-0.405937	0
478	CUST_1051_PI379238085	3508728_1	3508728_1	0.245136	0.266054	-0.0744797	-0.177099	-0.137112	-0.0929356
479	CUST_358_PI380538642	zams16_C21_093	Contig0619_ext	0.623519	0.463247	-0.567766	-0.105066	-0.561921	0
480	CUST_451_PI380538640	zams10_I21_087	#N/A	-1.09331	-0.972603	0.716476	0.337474	0.747525	0
481	CUST_359_PI380538648	zamn04_G19_074	Contig0901	0	0	0	0	0	0
482	CUST_1736_PI379238085	3499114_3	3499114_3	0	0	-0.304884	0	0	0
483	CUST_8997_PI379238085	3497858_1	3497858_1	1.51181	1.46612	-1.38606	-1.60195	-1.41456	-1.70943
484	CUST_432_PI380538640	zams07_L06_021	#N/A	0	0	0	0	0	0
485	CUST_98_PI380567544	Ph_Wnt-Gr2,	Ph_Wnt-Gr2,	0.40929	-0.156815	0.0386564	0	-0.408831	0
486	CUST_292_PI379238089	zaFBplate1_P24_082.ab1	zaFBplate1_P24_082.ab1_R	0.535543	0.077162	0.206757	0	0	0
487	CUST_221_PI380538642	zams17_F24_092	Contig0513	-0.101858	-0.0745641	0.121133	0.636443	0.14846	0.759844
488	CUST_139_PI380538644	zams18_K09_037	Contig0209	-0.228051	-0.488085	0.766822	0.13498	0.834338	0
489	CUST_4506_PI379238085	3509509_2	3509509_2	-0.139759	0	0	0	0	0
490	CUST_2542_PI379238085	3495985_1	#N/A	-0.0475369	0.013842	0.275748	0.410621	0.251694	0.533161
491	CUST_7896_PI379238085	3501768_1	3501768_1	-0.514795	-0.789938	0.728697	0.118792	0.619185	0
492	DarkCorner	DarkCorner	DarkCorner	0	0	0	-0.106743	0	0
493	CUST_9262_PI379238085	3498051_1	Ph_vasa,	-1.22111	-1.09116	1.40755	0.785808	1.33634	0.722186
494	CUST_3187_PI379238085	3501465_1	3501465_1	1.274	1.22154	-1.24178	-0.28885	-1.33824	-0.206502
495	CUST_109_PI380538640	zams11_H12_042	Contig0205	-0.73937	-0.717662	0.856686	0.585086	0.834961	0.610372
496	CUST_7330_PI379238085	3496243_1	3496243_1	0.253233	0.205422	-0.258968	-0.325425	-0.25252	-0.291933
497	CUST_129_PI379238085	3501357_1	Contig0243	1.13608	1.15805	-0.899958	-1.288	-0.877298	-1.2455
498	(+)E1A_r60_1	E1A_r60_1	E1A_r60_1	0.0157242	0.0787385	0.222264	0.102142	0.218956	0.136681
499	CUST_526_PI379238085	3497415_1	3497415_1	1.45625	1.45523	-1.42156	-1.77601	-1.33844	-1.64915
500	CUST_7891_PI379238085	3500288_1	#N/A	1.09459	1.11823	-0.878245	-1.46675	-0.863695	-1.26923
501	RC5	RC5	RC5	0	0	0	0	-0.404769	0
502	CUST_9091_PI379238085	3510608_1	3510608_1	0.340911	0.314433	-0.411174	0.0629318	-0.324972	0.365499
503	CUST_70_PI379238087	zaFBplate1_B07_032.ab1	zaFBplate1_B07_032.ab1_F	-1.27341	-1.20353	0.960128	0.4557	0.724439	0.418158
504	CUST_211_PI379238087	zaFBplate1_O12_034.ab1	Contig0305	-0.140777	-0.402473	-0.569057	0	-0.197259	0
505	CUST_19_PI380567544	Ph_Wnt-Y,	Ph_Wnt-Y,	0	0	0	0	-0.0769675	0
506	CUST_7540_PI379238085	3504560_1	3504560_1	-0.536991	-0.612461	0.519812	0.473986	0.46901	0.570693
507	CUST_102_PI380567544	Ph_GATA,	Ph_GATA,	0	0	0	0	-0.10866	0
508	RC7	RC7	RC7	0	0	0	0	-0.311208	0
509	CUST_473_PI380538644	zams19_H14_057	zams19_H14_057.ab1	-1.06345	-0.384409	1.20488	0	0.80211	0
510	CUST_172_PI380538648	zamn02_K07_022	Contig0029	0	-0.15817	0	0	-0.174957	0
511	CUST_1249_PI379238085	3495785_1	3495785_1	-0.0352356	0.0993765	-0.0110372	0.0936538	0.0447935	0.135678
512	CUST_1272_PI379238085	3496834_2	3496834_2	-0.304515	-0.465605	0.0842533	0	0.364727	0
513	CUST_479_PI380538642	zams15_K24_086	zams15_K24_086.ab1	-0.011754	-0.145991	0.306912	0	0.21414	0
514	CUST_222_PI380538636	zams03_L03_006	zams03_L03_006.ab1	-1.68804	-1.39426	1.46985	0.555043	1.43303	0.591876
515	CUST_70_PI380567544	Ph_Wnt-C,	Ph_Wnt-C,	0	0.333601	0	0	0	0
516	CUST_41_PI379238089	zaFBplate1_K13_053.ab1	zaFBplate1_K13_053.ab1_R	0.537552	0.462777	-0.792975	0	-0.476012	0
517	CUST_4754_PI379238085	3497509_1	Contig0596	-0.304064	-0.0614865	-0.235858	0	-0.245537	0
518	CUST_364_PI380538650	zamn02_I21_087	Contig0897	-0.562296	-0.487485	0.494928	0.677691	0.555052	0.59737
519	CUST_4585_PI379238085	3499859_1	3499859_1	-0.0945174	-0.0253316	0.0571804	0.478501	0.105389	0.334913
520	CUST_6_PI380538646	zams22_M12_036	zams22_M12_036.ab1	0	0.117368	0	0	0	0
521	CUST_8103_PI379238085	3498614_1	Contig0698	0.618645	0.681626	-0.508727	-0.85453	-0.464437	-0.819745
522	CUST_4800_PI379238085	3498535_1	3498535_1	-0.313865	-0.560249	0.165113	0.218107	0.105522	0
523	CUST_88_PI380567544	Ph_midline,	Ph_midline,	0	0	0	0	0.106327	0
524	CUST_8356_PI379238085	3497612_1	3497612_1	0.573053	0.567849	-0.739186	-1.16419	-0.663332	-1.43694
525	CUST_429_PI380538640	zams08_C14_061	Contig0170	0	0	0	0	0	0
526	CUST_4917_PI379238085	3501985_2	3501985_2	-0.557327	-0.666823	0.792651	0	0.753151	0
527	CUST_201_PI379238085	3496364_1	3496364_1	0.649903	0.596032	-0.381902	-0.748071	-0.306678	-0.702814
528	CUST_18_PI380567544	Ph_Wnt-Y,	Ph_Wnt-Y,	0	-0.137584	0.114716	0	0.0200472	0
529	CUST_103_PI380538638	zams05_P06_017	#N/A	0	0.0703594	-0.0541499	0	0	0
530	CUST_409_PI380538650	zamn07_I15_056	zamn07_I15_056.ab1	-0.0445825	0	0	0	-0.0816356	0
531	CUST_6290_PI379238085	3505099_2	3505099_2	1.03201	0.555821	-1.00566	-0.0118553	-0.423258	-0.336091
532	CUST_527_PI380538640	zams11_P20_066	zams11_P20_066.ab1	-1.50727	-1.61751	1.80333	1.52756	1.82772	1.36123
533	CUST_6438_PI379238085	3497863_3	Contig0630	0	0	0	0	-0.184293	-0.217744
534	CUST_2071_PI379238085	3498839_4	Contig0717_ext	0.225278	0.229559	-0.22569	-0.0128205	-0.22187	-0.0721648
535	CUST_5568_PI379238085	3503575_1	3503575_1	-0.839136	-0.543615	0.754582	0.596363	0.859726	0.194708
536	CUST_9226_PI379238085	3495920_5	#N/A	0.276963	0.263641	-0.379338	0.178644	-0.359497	0.0678246
537	CUST_3969_PI379238085	3508178_1	3508178_1	-0.00339579	-0.130941	0.216882	0.190325	0.153245	-0.0207776
538	CUST_107_PI380567544	DQ917571.1	DQ917571.1	-0.963682	-1.05879	1.24286	0.169235	0.872992	0.51827
539	CUST_7831_PI379238085	3506215_1	3506215_1	-1.28489	-1.16654	1.08967	0.357979	0.303219	0.247298
540	CUST_6465_PI379238085	3506733_2	3506733_2	0	0.221838	-0.0574848	0	0	0
541	CUST_8565_PI379238085	3501774_2	3501774_2	-0.0663923	0.0251064	0.0591883	0.0456313	-0.062542	-0.0591586
542	CUST_326_PI380538638	zams05_H02_009	Contig0163_ext	-0.608009	-0.667425	0.517479	0.202071	0.549221	0.0901803
543	CUST_7362_PI379238085	3500000_1	3500000_1	-0.763934	-0.436937	0.832226	0	0.642596	0.209596
544	CUST_3417_PI379238085	3496624_3	Contig0471	0.363702	0.452129	-0.300948	-0.285902	-0.299748	-0.312941
545	(+)E1A_r60_a107	E1A_r60_a107	E1A_r60_a107	-0.370512	-0.491226	-0.0601784	-0.177618	-0.0659083	-0.223947
546	CUST_7668_PI379238085	3506030_2	3506030_2	-0.266586	-0.0106124	0	0	0.035973	0
547	CUST_514_PI380538640	zams11_L07_022	#N/A	0	0	0	0	0	0
548	CUST_250_PI380538648	zamn01_A14_063	zamn01_A14_063.ab1	0	0	0	0	0	0
549	CUST_2238_PI379238085	3498458_2	DQ827723.1	0.275309	0.303117	-0.0284038	-0.0192455	-0.098218	0.0299875
550	CUST_91_PI380538640	zams09_M11_036	Contig0165	-1.46998	-1.4135	1.61529	1.611	1.61486	1.70691
551	CUST_6201_PI379238085	3501155_1	Contig0868	0.416342	0.457081	-0.244981	0.0310151	-0.286178	0.0824447
552	CUST_6050_PI379238085	3499566_2	3499566_2	2.45196	2.27582	-2.58348	-0.937952	-1.31604	-0.604945
553	CUST_70_PI380567544	Ph_Wnt-C,	Ph_Wnt-C,	0	0	0	0	-0.268166	0
554	CUST_383_PI380538644	zams18_E22_091	Contig0776	0.99979	0.967088	-0.851037	-1.1873	-0.807561	-1.30705
555	CUST_6667_PI379238085	3500761_1	Contig0601	0.267347	0.280204	-0.0342601	-0.151241	-0.0851779	-0.123728
556	CUST_7116_PI379238085	3497271_1	3497271_1	0.651749	0.692018	-0.480889	-0.748214	-0.455202	-0.897518
557	CUST_5843_PI379238085	3496931_1	Contig0525	0.174181	0.166876	-0.0997497	-0.160304	-0.145141	-0.137468
558	CUST_8249_PI379238085	3500811_1	3500811_1	-0.281573	-0.285653	0.335656	-0.0048832	0.242015	0.0698419
559	CUST_120_PI380567544	Ph_PL10,	Ph_PL10,	-0.415538	-0.486884	0.546546	0.101472	0.0348135	0
560	CUST_117_PI380567544	Ph_PL10,	Ph_PL10,	-0.623373	-0.452975	0.503904	0.0822233	0.00753012	0
561	CUST_297_PI380538650	zamn05_D18_077	zamn05_D18_077.ab1	0	0	0	0	-0.323915	0
562	CUST_2132_PI379238085	3502842_1	3502842_1	0.130258	0.0342806	-0.23791	0.119195	-0.144366	0.32747
563	CUST_5938_PI379238085	3497256_1	Contig0570	0.0646741	0.128984	-0.0434089	1.19963	-0.0973051	1.40534
564	CUST_41_PI380567544	Ph_tinman,	Ph_tinman,	0	-0.108319	0	0	0	0
565	CUST_2261_PI379238085	3499507_2	Contig0771	-0.561258	-0.242348	0.341468	0	0.315961	0
566	CUST_203_PI380538646	zams24_A14_063	#N/A	-1.31383	-1.17803	0.981086	0.415545	0.900336	0.228094
567	CUST_3738_PI379238085	3497610_1	#N/A	-0.374036	-0.32455	0.491499	0.27965	0.501488	0.360274
568	CUST_6732_PI379238085	3500170_2	3500170_2	-0.250282	-0.314505	0.137831	0.0771631	0.253547	0
569	CUST_104_PI380567544	Ph_GATA,	Ph_GATA,	0.285933	0	0	0	0	0
570	CUST_5168_PI379238085	3497968_2	Contig0640	2.08603	1.86422	-2.28984	0	-2.1763	0
571	CUST_1_PI380567544	DQ827723.1	DQ827723.1	0.270056	0.294374	-0.276312	-0.112794	-0.256516	0.174758
572	CUST_3031_PI379238085	3497275_1	3497275_1	-0.223312	-0.146867	0.263489	0.0821774	0.298686	0.229114
573	CUST_5399_PI379238085	3497113_2	Contig0550	0.877376	0.469932	-1.00228	0	-0.851068	0
574	CUST_8964_PI379238085	3502761_2	3502761_2	-0.0451677	-0.302537	-0.231912	0	0.0421111	0
575	CUST_5256_PI379238085	3495903_1	Contig0339	-0.0263954	-0.000812597	0.157496	0.215712	0.142115	0.194355
576	CUST_7243_PI379238085	3508927_2	3508927_2	-0.23493	-0.223053	0.313315	0.024943	0.280289	0.0960416
577	CUST_71_PI380567544	Ph_vasa,	Ph_vasa,	-1.22271	-1.17279	1.41649	0.898555	1.41396	0.91984
578	CUST_151_PI380538648	zamn02_O14_049	zamn02_O14_049.ab1	0	0	0	0	0	0
579	CUST_6159_PI379238085	3500205_2	3500205_2	1.50042	1.44789	-2.29489	0	-2.21657	0
580	CUST_431_PI379238085	3508150_1	3508150_1	0	0.246612	-0.394843	0	-0.562963	0
581	CUST_3429_PI379238085	3495984_5	3495984_5	-0.66392	-0.706423	0.695567	0	0.439813	0.35761
582	CUST_568_PI380538642	zams14_H16_058	Contig0244	-0.735836	-0.87193	0.524835	0.395889	0.435368	0.531169
583	CUST_78_PI380538638	zams05_G02_009	Contig1000	-0.762556	-0.790815	0.71573	0.816109	0.645062	0.976493
584	CUST_7016_PI379238085	3496738_4	Contig0493_ext	1.99148	2.12739	-1.8977	0	-1.8645	0
585	RC12	RC12	RC12	0	0	0	0	0	0
586	CUST_306_PI380538638	zams04_H16_058	zams04_H16_058.ab1	0	0	0	0	-0.618265	0
587	CUST_257_PI380538644	zams18_J16_056	zams18_J16_056.ab1	0.114392	0	0	0	0	0
588	CUST_3503_PI379238085	3497067_2	Contig0545	0.0466686	0.0390094	0.0116569	0.344694	0.0364779	0.359221
589	CUST_3735_PI379238085	3503689_1	3503689_1	-0.0548495	-0.0400869	0.349763	-0.0882973	0.0420796	0
590	CUST_70_PI380538644	zams18_O19_066	zams18_O19_066.ab1	0	0	0	0	-0.275172	0
591	CUST_8462_PI379238085	3495902_3	3495902_3	-0.221558	-0.177976	0.25896	0.322916	0.292411	0.360757
592	CUST_58_PI380538642	zams13_L12_038	#N/A	0	0	0	0	-0.151441	0
593	CUST_2587_PI379238085	3496073_1	3496073_1	1.0371	1.12096	-0.982372	-1.50476	-0.917484	-1.42041
594	CUST_138_PI379238087	zaFBplate1_M15_052.ab1	#N/A	0.250209	-0.397032	-0.170526	0	-0.103737	0
595	CUST_466_PI380538640	zams08_E13_059	zams08_E13_059.ab1	-0.465333	-0.64331	0.540016	0	0.497578	0
596	CUST_242_PI380538650	zamn07_N16_052	zamn07_N16_052.ab1	0	0.179007	0	0	0	0
597	CUST_386_PI380538648	zamn01_B23_096	zamn01_B23_096.ab1	0	0	0	0	0	0
598	CUST_173_PI379238085	3497632_1	3497632_1	0.0994835	0.114412	-0.149724	0.103688	-0.105086	0.09776
599	CUST_6575_PI379238085	3501778_1	Contig0610_ext	2.36141	2.37591	-2.30812	0	-1.95976	0
600	CUST_674_PI379238085	3502542_1	3502542_1	-0.290852	-0.348604	0.19567	0.0784635	0.279299	0.253597
601	CUST_8024_PI379238085	3506555_1	3506555_1	-0.0614941	0.13768	0	0	0	0
602	CUST_6148_PI379238085	3499571_1	Contig0774	-0.0813335	-0.00649184	0.221927	-0.227493	0.243531	-0.284469
603	CUST_6455_PI379238085	3497356_1	3497356_1	-0.000654488	-0.0166886	-0.21867	0.22556	-0.166152	0.393731
604	CUST_230_PI380538642	zams15_B18_079	Contig0266	0	0	0	0	0	0
605	RC6	RC6	RC6	0	0	0	0	-0.391156	0
606	CUST_2271_PI379238085	3498943_1	#N/A	0.00479096	0.0841294	0.164588	0.519235	0.184786	0.455889
607	CUST_6111_PI379238085	3507796_2	3507796_2	-0.496331	-0.175603	0.389604	0	0.247814	0
608	CUST_7240_PI379238085	3500237_1	3500237_1	0.567431	0.614538	-0.439919	-0.0967934	-0.419429	-0.116815
609	CUST_4288_PI379238085	3501005_1	3501005_1	-0.684819	-0.661957	0.674741	0	0.61194	0
610	CUST_67_PI380538646	zams25_H08_026	zams25_H08_026.ab1	0	-0.336914	0	0	0	0
611	CUST_3060_PI379238085	3506652_1	#N/A	0	-0.290402	0.232959	0	0.130987	0
612	CUST_8663_PI379238085	3503266_1	3503266_1	0.206699	-0.113993	0	0	-0.274316	-0.0093851
613	CUST_7626_PI379238085	3504795_1	3504795_1	-0.0939172	0.0905066	0.513407	0	0.0323497	-0.169089
614	CUST_60_PI380567544	Ph_Wnt-Z,	Ph_Wnt-Z,	0	0	0	0	0	0
615	CUST_8453_PI379238085	3497060_1	zams15_B22_095.ab1	0.195166	0.209793	-0.0706839	-0.232102	-0.070963	-0.298442
616	CUST_63_PI380567544	Ph_nanos,	Ph_nanos,	-2.31731	-2.29274	2.52263	1.92476	2.49175	1.80715
617	CUST_86_PI380567544	Ph_midline,	Ph_midline,	0	0.220488	0	0	0	-0.227207
618	CUST_215_PI380538638	zams06_L05_021	zams06_L05_021.ab1	-0.835574	-1.40675	1.24161	0.530354	1.3354	0.576662
619	CUST_57_PI380538644	zams20_C18_077	zams20_C18_077.ab1	-0.990451	-1.03247	0.758165	0.388009	0.781213	0.312871
620	CUST_2788_PI379238085	3500398_1	3500398_1	0.582662	0.419472	-0.774121	-0.381286	-0.602691	-0.432145
621	CUST_476_PI380538644	zams18_J21_087	#N/A	0	0	0	0	0	0
622	CUST_9089_PI379238085	3498862_1	Contig0720	-0.257085	-0.258601	0.247291	-0.317167	0.234386	-0.302862
623	CUST_5797_PI379238085	3499160_1	3499160_1	1.21726	1.26521	-1.15701	-1.43315	-1.15682	-1.2834
624	CUST_82_PI380567544	DQ827719.1	DQ827719.1	0	0	0	0	0	0
625	CUST_6804_PI379238085	3509735_2	3509735_2	0	0	0	0	0	0
626	CUST_74_PI380538638	zams04_J23_088	Contig0202	1.32702	1.17548	-1.14333	-1.02244	-1.16635	-1.03576
627	CUST_364_PI380538648	zamn05_L19_070	zamn05_L19_070.ab1	0	0	0	0	0	0
628	CUST_47_PI380567544	Ph_Wnt-B,	Ph_Wnt-B,	-0.0513113	0	0	0	0	0
629	CUST_56_PI380567544	Ph_Wnt-Z,	Ph_Wnt-Z,	0	0	0	0	0	0
630	(+)eQC-40	EQC	EQC	0	0	0	0	0	0
631	CUST_1695_PI379238085	3507033_1	3507033_1	0.0341721	-0.220324	0.133571	0	-0.0497555	0
632	CUST_7954_PI379238085	3499373_1	#N/A	-0.125385	-0.100669	0.334102	-0.143344	0.270041	-0.142249
633	CUST_9026_PI379238085	3505400_2	3505400_2	-1.03281	-1.45436	1.40507	0.537367	0.478477	0.381755
634	CUST_180_PI379238085	3496992_1	#N/A	0.00958424	0.0314113	-0.00786816	0.0546878	-0.0251337	0.0775353
635	CUST_303_PI380538650	zamn07_A15_064	#N/A	0	0	0	0	-0.30208	0
636	CUST_328_PI379238085	3508194_1	3508194_1	-0.373009	0	0	0	-0.331101	0
637	CUST_3250_PI379238085	3508653_2	3508653_2	0.777378	0.69114	-0.88484	0	-0.352079	0
638	CUST_5930_PI379238085	3501466_1	3501466_1	0.0690441	0.0182597	-0.00733474	0.287773	-0.0331929	0.336388
639	(-)3xSLv1	NegativeControl	NegativeControl	0	0	0	0	-0.174266	0
640	CUST_335_PI380538650	zamn02_I05_023	Contig0741	0.286032	0.324024	-0.246111	-0.0415827	-0.26605	0.024008
641	CUST_227_PI380538640	zams09_G13_057	#N/A	0	0	0	0	-0.306876	0
642	CUST_534_PI380538642	zams15_K20_070	zams15_K20_070.ab1	0	0	0	0	-0.359168	0
643	CUST_5516_PI379238085	3497500_1	3497500_1	0.391741	0.457814	-0.406441	0.027313	-0.444258	0.142379
644	CUST_163_PI380538642	zams15_I16_056	#N/A	-0.155078	0	0.0317538	0	-0.378162	0
645	CUST_2264_PI379238085	3496846_3	#N/A	-0.103358	-0.0888026	0.225273	0.720646	0.184948	0.828008
646	CUST_6184_PI379238085	3500969_2	#N/A	2.47769	2.35609	-2.599	0	-2.5075	0
647	CUST_59_PI380567544	Ph_Wnt-Z,	Ph_Wnt-Z,	0	0	0	0	0	0
648	CUST_340_PI380538650	zamn01_B24_096	#N/A	0.113688	0	0	0	0	0
649	CUST_196_PI379238087	zaFBplate1_C10_045.ab1	Contig0296_ext	0.286363	0.281557	-0.539875	0.00102705	-0.611036	0.357447
650	CUST_3118_PI379238085	3508575_1	#N/A	1.55823	1.67115	-1.59027	-1.75114	-1.57552	-1.56541
651	(+)E1A_r60_a135	E1A_r60_a135	E1A_r60_a135	-0.30254	-0.277987	-0.159389	-0.25588	-0.0742376	-0.127883
652	CUST_2007_PI379238085	3506834_1	3506834_1	-0.608058	-0.859927	0.513534	0.338049	0.793422	0
653	CUST_6154_PI379238085	3498954_2	3498954_2	0.0648875	0.111588	-0.0340072	-0.52788	-0.0219428	-0.480047
654	CUST_2402_PI379238085	3497608_1	3497608_1	0.16127	0.189774	-0.117767	-0.439658	-0.10808	-0.356572
655	CUST_7691_PI379238085	3510341_1	3510341_1	-0.10104	-0.436167	-0.185978	0	0.129612	0
656	CUST_373_PI380538636	zams03_G19_074	Contig0252	-0.770299	-0.767004	0.83689	0.0126507	0.744779	0
657	CUST_40_PI380538640	zams10_K05_021	#N/A	0	0.452236	0	0	0	-0.0827533
658	CUST_24_PI380538644	zams20_A23_096	#N/A	0.0520158	0	-0.172572	0	0	-0.0644502
659	CUST_1335_PI379238085	3496323_3	3496323_3	0.638654	0.674785	-0.666218	-0.925521	-0.651091	-0.769989
660	CUST_229_PI380538644	zams18_E03_012	#N/A	0.723166	0.606098	-0.964148	0	-0.58523	0
661	CUST_85_PI380567544	DQ827719.1	DQ827719.1	0	0	0	0	0	0
662	CUST_6584_PI379238085	3502040_1	3502040_1	0	0	0	0	-0.151088	0
663	CUST_154_PI380538648	zamn05_J10_039	Contig0071	0	0	-0.164896	0	0.0195334	0
664	(+)E1A_r60_a22	E1A_r60_a22	E1A_r60_a22	0.819618	0.773615	0.917534	1.04753	0.990114	1.18715
665	CUST_1460_PI379238085	3496536_2	3496536_2	0.485631	0.408191	-0.147155	-0.273455	-0.0997468	-0.225583
666	CUST_4834_PI379238085	3497464_2	Contig0589	0	-0.0220553	0	0	-0.716161	0
667	CUST_222_PI380538644	zams21_K22_085	zams21_K22_085.ab1	0.395496	0.478344	-0.391615	-0.477402	-0.432029	-0.373328
668	CUST_5645_PI379238085	3503962_2	3503962_2	-0.42809	-0.444609	0.678232	0	0.478898	0
669	CUST_34_PI379238089	zaFBplate1_H06_025.ab1	zaFBplate1_H06_025.ab1_R	-0.0782517	-0.14419	0.0767458	0.255513	0.081618	0.598485
670	CUST_66_PI380538648	zamn02_P07_018	Contig1007	-0.636297	-0.589431	0.711046	0.546657	0.730578	0.567816
671	CUST_376_PI379238085	3502873_1	3502873_1	0	0	0.166598	0	-0.14813	0
672	CUST_54_PI380567544	Ph_Wnt-Gr1,	Ph_Wnt-Gr1,	0	0	0.121625	0	-0.147544	0
673	CUST_6551_PI379238085	3509628_2	3509628_2	-0.618679	-0.645149	0.553704	0	0.42605	0
674	CUST_73_PI380567544	Ph_vasa,	Ph_vasa,	-1.28267	-1.19763	1.419	0.815917	1.41863	0.818945
675	CUST_2629_PI379238085	3495865_4	Contig0333	0.972251	1.09888	-0.804531	-1.20438	-0.724167	-1.11785
676	CUST_3842_PI379238085	3499359_2	Contig0764	-0.00644711	0.0680948	0.0326679	-0.267974	0.0583988	-0.242684
677	ETG10_13482	ETG10_13482	ETG10_13482	0	0	0	0	0	0
678	CUST_3100_PI379238085	3495996_1	Contig0363	-0.151406	-0.100117	0.185812	0.358929	0.221455	0.430833
679	CUST_40_PI380567544	DQ827722.1	DQ827722.1	0	-0.0170178	0	0	0	0
680	CUST_245_PI380538638	zams06_G16_058	Contig0622	-0.22106	-0.272753	0	0	0.308524	0
681	CUST_119_PI380567544	Ph_PL10,	Ph_PL10,	-0.634965	-0.579022	0.623691	0	0.157765	0
682	CUST_2087_PI379238085	3501384_2	3501384_2	0.223807	0.222476	-0.198037	0.462338	-0.154521	0.115344
683	CUST_7398_PI379238085	3503425_2	3503425_2	-0.411708	-0.555473	0.243338	0.177792	0.522256	0
684	CUST_6115_PI379238085	3499544_2	Contig0772	1.39466	1.38948	-1.34377	-0.819068	-1.28682	-0.85509
685	CUST_4501_PI379238085	3497093_2	Contig0079	0.112705	0.11984	-0.20886	0.0398643	-0.170514	0.0442796
686	CUST_5956_PI379238085	3503896_1	3503896_1	-0.106562	-0.938439	0.223463	-0.104806	0.424435	0
687	CUST_189_PI380538644	zams19_D23_094	Contig0209	-0.257382	-0.358697	0.733007	0	0.605293	0
688	CUST_271_PI379238087	zaFBplate1_M10_035.ab1	zaFBplate1_M10_035.ab1_F	-0.352083	-0.450816	0.39194	0	0.153769	0
689	CUST_203_PI380538636	zams03_D10_045	#N/A	0	0	0	0	0	0
690	CUST_1306_PI379238085	3498366_1	3498366_1	0.680198	0.767095	-0.759033	-1.1466	-0.713528	-1.15103
691	CUST_41_PI380538650	zamn03_F23_092	zamn03_F23_092.ab1	0	0.321404	0.160253	0	0	0
692	CUST_87_PI380538640	zams11_K09_037	#N/A	0.0882253	0	0.0126327	0	0	0
693	CUST_4013_PI379238085	3496702_1	3496702_1	-0.619518	-0.582602	0.603004	0.0277788	0.633634	0.0173348
694	CUST_419_PI380538642	zams14_G23_090	Contig0474	-0.523186	-0.464932	0.467358	0.131736	0.485223	0.0594801
695	CUST_262_PI380538640	zams08_A07_032	zams08_A07_032.ab1	0	0.0816587	0	0	-0.0323738	-0.146516
696	CUST_4961_PI379238085	3504087_1	3504087_1	0	0	-0.394687	0	0	-0.262141
697	CUST_8649_PI379238085	3501169_5	Contig0872	0.176937	0.233527	-0.141148	-0.0400583	-0.107132	-0.0413402
698	CUST_1796_PI379238085	3506803_2	3506803_2	0.341998	0.241775	-0.276099	-0.577184	-0.301906	-0.545749
699	CUST_51_PI380538642	zams15_C17_077	Contig0116_ext	0.11914	-0.198566	0	0	0	-0.0571281
700	CUST_2532_PI379238085	3495985_5	Contig0359	0.176453	0.170454	-0.279434	0.171495	-0.301157	0.0218035
701	CUST_7058_PI379238085	3498404_1	3498404_1	0.201188	0.16128	-0.335414	0	-0.185371	-0.0682612
702	CUST_684_PI379238085	3510061_1	3510061_1	0.124671	0.152022	-0.0750832	-0.415924	-0.0649148	-0.410232
703	CUST_334_PI380538644	zams21_K24_086	zams21_K24_086.ab1	0	0	0	0	0	0
704	CUST_67_PI380567544	Ph_Wnt-C,	Ph_Wnt-C,	0.376076	-0.0507948	0.475763	0	0.276017	0
705	CUST_9128_PI379238085	3507656_2	3507656_2	-0.351261	-0.107457	0.238171	0	-0.00197298	0
706	CUST_5502_PI379238085	3497855_3	3497855_3	-0.223719	-0.310901	0.157965	-0.355918	0.179645	-0.335659
707	CUST_2451_PI379238085	3509093_1	Contig0384_ext	0.0672724	0.07732	0.0565563	0.126413	0.0572482	0.106678
708	CUST_5733_PI379238085	3505863_1	3505863_1	-0.285789	-0.300221	0.311532	0.310474	0.335915	0.18155
709	CUST_13_PI380538648	zamn01_J19_072	zamn01_J19_072.ab1	0	0	0	0	0	0
710	ETG05_36762	ETG05_36762	ETG05_36762	0	0	0	0	0	0
711	CUST_7798_PI379238085	3501555_1	Contig0930_ext	0.172817	0.161223	-0.0561955	0.406627	-0.10343	0.392733
712	CUST_1222_PI379238085	3509942_1	3509942_1	-1.29435	-1.26892	1.44191	1.66872	1.48588	1.41537
713	CUST_4494_PI379238085	3503347_1	Contig0956	0	0	0	0	0	0
714	CUST_210_PI380538640	zams07_O12_034	zams07_O12_034.ab1	0	0	0	0	0.102698	0
715	CUST_8441_PI379238085	3505411_1	3505411_1	-0.100674	0	0	0	-0.156048	0
716	CUST_557_PI380538646	zams24_B08_032	zams24_B08_032.ab1	0	0	0	0	-0.294221	0
717	CUST_1393_PI379238085	3502865_2	#N/A	0.689368	0.692717	-0.753608	-0.55661	-0.673711	-0.339654
718	CUST_39_PI380538650	zamn02_A23_096	zamn02_A23_096.ab1	0.285595	0	0	0	-0.250223	0
719	CUST_8_PI380538648	zamn05_C08_030	Contig0077_ext	-0.859344	-0.952071	0.906832	0.729535	0.457905	0.747013
720	CUST_5542_PI379238085	3504628_1	3504628_1	0.246257	0.174353	-0.427677	-0.250143	-0.294291	0
721	CUST_370_PI380538646	zams24_A01_015	Contig0285_ext	0	0	0	0	-0.319957	0
722	CUST_5575_PI379238085	3496727_2	3496727_2	1.40439	1.41062	-1.26619	-0.373315	-0.841415	0
723	CUST_346_PI380538638	zams04_N09_035	#N/A	0.0464117	0.0175659	-0.00189478	-0.0860765	-0.0360557	0.0526417
724	CUST_3075_PI379238085	3497707_4	3497707_4	0.196464	0.150166	-0.0551357	-0.334654	-0.0724085	-0.245301
725	CUST_55_PI380567544	Ph_Wnt-Gr1,	Ph_Wnt-Gr1,	0	0	0	0	-0.202881	0
726	CUST_116_PI380538644	zams21_P15_050	#N/A	-0.911872	-0.854555	0.925311	0	0.0642676	0
727	CUST_412_PI380538650	zamn06_O09_033	zamn06_O09_033.ab1	-0.046192	0	0.106552	0	0.225712	0
728	CUST_229_PI379238085	3506305_1	3506305_1	-0.195511	-0.282208	0.212221	-0.0821395	0.243714	0.259447
729	CUST_208_PI380538644	zams19_E21_091	Contig0556	0.340476	0.381845	-0.297684	-0.188974	-0.365216	-0.111634
730	CUST_57_PI380567544	Ph_Wnt-Z,	Ph_Wnt-Z,	-0.179002	-0.23833	0.488784	0	0.171385	0
731	CUST_6171_PI379238085	3495809_3	3495809_3	-0.228265	-0.192038	0.425468	0.743875	0.411331	0.889155
732	CUST_4202_PI379238085	3496729_3	Contig0489	0.342537	0.36889	-0.188195	-0.151391	-0.200458	-0.0794512
733	CUST_5199_PI379238085	3499203_4	Contig0754	0	0	0	0	0	0
734	RC8	RC8	RC8	0	0	0	0	0	0
735	CUST_117_PI380567544	Ph_PL10,	Ph_PL10,	-0.503817	-0.64235	0.920464	0.0833107	0.898173	0
736	CUST_130_PI380538640	zams11_G06_025	zams11_G06_025.ab1	0	0	0	0	0	0
737	CUST_8416_PI379238085	3497514_2	Contig0597	-0.0593261	-0.0148323	0.133841	-0.382344	0.135795	-0.31423
738	(-)3xSLv1	NegativeControl	NegativeControl	0.206341	0	0	0	0	0
739	CUST_322_PI380538646	zamn05_D13_061	zamn05_D13_061.ab1	0	-0.000980905	0	0	0	-0.154478
740	CUST_7377_PI379238085	3498166_4	3498166_4	-0.0301328	0.00330467	-0.0307273	0.122198	-0.0305397	0.282215
741	CUST_6712_PI379238085	3496845_1	Contig0512	-0.071798	-0.0519999	0.211305	0.249906	0.207561	0.261282
742	CUST_2853_PI379238085	3497215_4	Contig0563	0.656879	0.67307	-0.43591	-0.144924	-0.407049	-0.150445
743	CUST_9190_PI379238085	3508445_1	3508445_1	0.597806	0.529473	-1.21918	-0.0933945	-0.802903	0
744	CUST_2439_PI379238085	3495973_2	3495973_2	-0.786195	-0.582339	0.629	0.320388	0.38265	0.415334
745	CUST_96_PI380567544	Ph_Wnt-Gr2,	Ph_Wnt-Gr2,	0.549145	0.282811	-0.301748	0	-0.350429	0
746	CUST_117_PI380567544	Ph_PL10,	Ph_PL10,	-0.274562	-0.442999	0.516995	0	0.42333	0
747	CUST_1134_PI379238085	3496469_2	Contig0448	0.019602	-0.0394672	-0.16438	0.113098	-0.0250457	0.184183
748	CUST_5594_PI379238085	3501963_2	3501963_2	1.10317	1.20958	-1.312	-0.639038	-0.914276	-0.562141
749	CUST_2192_PI379238085	3496944_1	Contig0526	0.0788442	0.159	-0.16156	-0.31458	-0.147256	-0.225004
750	CUST_421_PI379238085	3499636_1	Contig0779	0.602366	0.606602	-0.630879	-0.00692559	-0.492644	0
751	CUST_8405_PI379238085	3496034_1	#N/A	0.461404	0.433908	-0.314161	-0.115479	-0.30214	0.150651
752	CUST_637_PI379238085	3500358_1	3500358_1	0.458286	0.411764	-0.248181	0.289451	-0.221074	0.382869
753	CUST_77_PI380567544	Ph_brachyury	Ph_brachyury	0	0	0	0	0	0
754	CUST_2188_PI379238085	3501264_1	Contig0885	0.821739	0.730515	-0.642421	-0.0421722	-0.512308	0
755	CUST_1574_PI379238085	3509521_1	3509521_1	0	-0.0265796	0	0	0.0957836	0
756	CUST_543_PI379238085	3496344_1	3496344_1	0.00457218	0.119803	0.00260023	-0.104769	0.0272695	-0.0447898
757	CUST_1836_PI379238085	3500898_1	3500898_1	0	0	0	0	0	0
758	CUST_2119_PI379238085	3497606_1	3497606_1	0.374037	0.429375	-0.334686	0	-0.231213	0
759	CUST_277_PI380538650	zamn07_D23_094	Contig0095	0.937768	0.299946	-0.757758	0	-0.589115	0
760	CUST_1435_PI379238085	3501287_2	3501287_2	0.924436	0.923693	-1.22301	0	-1.15137	0
761	CUST_2635_PI379238085	3498526_1	3498526_1	0.998418	0.774926	-1.01947	0	-0.796958	0
762	CUST_16_PI380538650	zamn06_E20_076	zamn06_E20_076.ab1	0	0	0	0	0	0
763	CUST_2964_PI379238085	3503703_1	3503703_1	0.223167	0.269366	-0.125038	0.475211	-0.163048	0.436624
764	CUST_7072_PI379238085	3501467_2	Contig0919	0.0111755	0.0868424	0.00673568	0.333637	0.0487467	0.302682
765	CUST_58_PI380538640	zams11_A14_063	Contig0484	0	0.0690565	0	0	0	0
766	CUST_4010_PI379238085	3497598_1	3497598_1	-0.805346	-0.748308	0.733602	0.219671	0.761727	0.188871
767	CUST_3899_PI379238085	3500531_3	Contig0832	0	0	-0.153133	0	-0.364508	0
768	CUST_9273_PI379238085	3496870_4	3496870_4	0.193947	0.0250112	-0.10779	0	0.188088	0
769	CUST_92_PI380538650	zamn07_B13_063	zamn07_B13_063.ab1	0	0	0	0	0	0
770	RC1	RC1	RC1	0	0	0	0	0	0
771	CUST_65_PI380567544	Ph_nanos,	zams23_D02_013.ab1	-1.04987	-0.982082	1.03446	1.12284	1.06365	1.08009
772	CUST_277_PI380538636	zams01_J16_056	#N/A	-0.107765	0.00740814	0.0847633	-0.644844	0.128845	-0.430528
773	CUST_225_PI380538646	zams23_A13_063	zams23_A13_063.ab1	-0.49073	-0.501883	0.685724	0	0.497464	0
774	CUST_103_PI380567544	Ph_GATA,	Ph_GATA,	0	0	0	0	0	-0.240243
775	CUST_319_PI380538644	zams18_A12_048	#N/A	-0.380274	0	0.155376	0	0	-0.111185
776	CUST_8273_PI379238085	3495908_1	3495908_1	-0.744558	-0.463369	0.71569	0.388949	0.624572	0.143996
777	CUST_9139_PI379238085	3497630_2	Contig0604	-0.333069	-0.295523	0.22254	-0.0184573	0.243397	-0.0832279
778	CUST_4638_PI379238085	3509755_1	3509755_1	-0.9148	-0.757545	0.965246	0.575889	0.906755	0.359708
779	CUST_438_PI380538644	zams18_K17_069	Contig0232	-0.645469	-0.254455	0.748325	0	0.399025	-0.0511267
780	CUST_498_PI380538646	zams25_L04_006	Contig0544_ext	0.602414	0.0439797	-0.127738	0	-0.491482	-0.171686
781	CUST_6295_PI379238085	3496306_2	Contig0420	0.00869716	0.00933049	-0.269147	0.300464	-0.183644	0.250284
782	CUST_4408_PI379238085	3500299_1	Contig0311	0.18983	0.270543	-0.131257	0.0142452	-0.113102	-0.0274716
783	CUST_44_PI380538640	zams11_H22_089	Contig0842	0.428189	0.447617	-0.301919	-0.371231	-0.32941	-0.34316
784	CUST_163_PI379238087	zaFBplate1_E18_075.ab1	zaFBplate1_E18_075.ab1_F	-0.155608	-0.23625	0.146571	-0.420828	0.188434	-0.491506
785	CUST_6958_PI379238085	3499398_3	Contig0767	0.0964658	0.0960013	-0.0500856	-0.146073	-0.0157746	-0.185518
786	CUST_7859_PI379238085	3501866_2	3501866_2	-0.0923358	-0.0304557	0.0492538	0	0.0218246	0
787	CUST_15_PI380538642	zams13_E13_059	#N/A	0.499567	0.125054	-0.358209	0	0	0
788	CUST_5246_PI379238085	3497008_1	Contig0534	0	0	0	0	0	0
789	CUST_311_PI380538644	zams21_P13_049	zams21_P13_049.ab1	-0.11572	0	0	0	0	0
790	CUST_5460_PI379238085	3510801_1	3510801_1	-1.3523	-1.45599	1.45298	0.918507	1.64101	0.976327
791	CUST_310_PI380538646	zams25_C03_014	zams25_C03_014.ab1	0	0	0	0	0	0
792	CUST_61_PI380567544	Ph_nanos,	Ph_nanos,	0	0	0	0	0	0
793	CUST_5300_PI379238085	3506718_1	3506718_1	0.756832	0.164533	-0.900214	0	-0.477558	0
794	CUST_7360_PI379238085	3500000_2	3500000_2	-0.37464	-0.230786	0.573523	0	0.229364	0
795	CUST_1432_PI379238085	3501363_2	Contig0902	0.527084	0.55155	-0.411772	-0.512003	-0.454686	-0.45893
796	CUST_5401_PI379238085	3504824_2	3504824_2	0	0	0	0	-0.112759	0
797	CUST_5991_PI379238085	3497998_1	3497998_1	0	0	0	0	-0.108868	0
798	CUST_187_PI380538640	zams10_O06_017	Contig0775_ext	0.245845	0.339928	-0.845358	0	-0.316406	0
799	CUST_96_PI380538636	zams02_L05_021	Contig0131	-1.75096	-1.37148	1.70048	0.654533	0.454884	0.627428
800	CUST_4575_PI379238085	3503714_2	3503714_2	0.386247	0.331176	-0.520305	-0.0786275	-0.274985	0
801	CUST_352_PI380538648	zamn01_A04_016	#N/A	0	0	0	0	-0.191173	0
802	CUST_7296_PI379238085	3504162_1	3504162_1	1.06966	0.925387	-1.49123	0	-0.574163	0
803	CUST_6216_PI379238085	3497021_3	Contig0537	-0.527562	-0.354043	0.491033	0	-0.0414105	0
804	CUST_3845_PI379238085	3503138_1	Contig0781	0	0	0	0	-0.321657	0
805	CUST_1346_PI379238085	3506619_1	Contig0996	-0.622192	-0.548803	0.597562	0.531613	0.515667	0.580487
806	CUST_42_PI380538638	zams04_F24_092	zams04_F24_092.ab1	0	0	0	0	-0.514718	0
807	CUST_175_PI380538650	zamn07_E14_059	zamn07_E14_059.ab1	-0.510724	-0.460503	0.507433	0.6191	0.431618	0.766005
808	CUST_3889_PI379238085	3497293_2	3497293_2	0.924522	0.842256	-0.949128	0	-0.602915	0
809	CUST_7661_PI379238085	3497493_1	Contig0593	-0.388108	0	0.149761	0	0.253572	0
810	CUST_1159_PI379238085	3498059_2	3498059_2	0.208029	0.238471	-0.102604	-0.159697	-0.111031	-0.0745776
811	CUST_2407_PI379238085	3500823_1	3500823_1	0.211062	0.185154	-0.0509949	0.253762	-0.0142881	0
812	CUST_214_PI380538648	zamn01_F04_012	#N/A	-1.36301	-1.32525	1.48537	0.777689	1.384	0.987045
813	CUST_26_PI380567544	DQ917572.1	DQ917572.1	0.0692378	0.138357	0.201346	0	0.355769	0
814	CUST_3569_PI379238085	3501341_10	3501341_10	0.145656	0.178244	-0.0976716	-0.533045	-0.03672	-0.0964693
815	CUST_542_PI380538642	zams13_N09_035	zams13_N09_035.ab1	0	0	0	0	0	0
816	CUST_421_PI380538648	zamn06_O22_081	#N/A	0	0	0	0	0	0
817	CUST_546_PI379238085	3495803_1	3495803_1	0.358756	0.340832	-0.303087	-0.161403	-0.249374	-0.0222492
818	CUST_460_PI380538646	zams25_C08_030	Contig0286	-1.69411	-1.50527	1.49761	0.464631	1.31643	0.37839
819	CUST_2637_PI379238085	3495865_2	Contig0333	1.3205	1.36875	-1.04497	-1.45278	-1.10823	-1.37104
820	CUST_2398_PI379238085	3503915_2	3503915_2	-0.110632	-0.403182	0.30788	0	0.223237	0
821	CUST_36_PI380538640	zams09_P20_066	zams09_P20_066.ab1	0.172316	-0.0545145	0	0	0.02486	0.0103466
822	CUST_2_PI380567544	DQ827723.1	DQ827723.1	0.356418	0.345757	-0.292688	-0.166737	-0.303894	-0.0891052
823	CUST_7645_PI379238085	3500246_1	Contig0805	0.878696	0.858739	-0.861951	0.0277792	-0.836341	0.0963824
824	CUST_319_PI380538648	zamn03_B07_032	#N/A	0	0	0	0	0	0
825	(+)E1A_r60_n9	E1A_r60_n9	E1A_r60_n9	-0.628667	-0.698192	-0.560291	-0.669906	-0.475725	-0.596241
826	CUST_245_PI380538648	zamn03_J01_007	zamn03_J01_007.ab1	0.18998	0.0107955	-0.109838	0	-0.0669559	0
827	CUST_289_PI380538646	zams24_I24_088	zams24_I24_088.ab1	0	0	0	0	-0.29344	0
828	CUST_2089_PI379238085	3505601_1	Contig0981_ext	-0.283729	-0.284068	0.171853	0.0691665	0.383894	0.275089
829	CUST_2011_PI379238085	3496409_1	#N/A	0.183649	0.153888	-0.174466	0.0884362	-0.143628	0.146631
830	CUST_3665_PI379238085	3505168_1	3505168_1	0.445818	-0.0514613	-0.361113	0	-0.341241	0
831	CUST_4024_PI379238085	3500329_3	3500329_3	0.392235	0.399875	-0.351933	-0.288553	-0.38795	0.153387
832	ETG04_27747	ETG04_27747	ETG04_27747	0	0	0	0	0	0
833	CUST_1120_PI379238085	3509986_1	3509986_1	0.686979	0.628159	-0.661652	-0.721369	-0.835395	-0.545905
834	CUST_2450_PI379238085	3503794_1	Contig0961	0.937584	0.989879	-1.0945	-0.475873	-1.03997	-0.282776
835	CUST_3833_PI379238085	3497338_1	Contig0577	0.653605	0.694392	-0.571169	-1.21948	-0.601749	-1.14082
836	CUST_3051_PI379238085	3510053_1	3510053_1	1.25417	1.38075	-1.76464	0	-1.21891	0
837	CUST_9124_PI379238085	3497360_1	3497360_1	0	0	0	0	-0.387344	0
838	CUST_7828_PI379238085	3501533_1	Contig0926	-2.21712	-2.19283	2.45798	0.752146	2.25585	0.776316
839	CUST_155_PI379238085	3498627_2	3498627_2	-0.770354	-0.686598	0.656855	0.697218	0.743178	0.942028
840	CUST_428_PI380538650	zamn07_K08_022	zamn07_K08_022.ab1	0	0	0	0	0	0
841	CUST_8407_PI379238085	3503669_2	3503669_2	-0.35969	-0.275092	0.169167	0.324934	0.294373	0.220858
842	CUST_6648_PI379238085	3497977_2	Contig0642	-0.0825882	-0.0400427	0.128617	0.435859	0.163499	0.530216
843	CUST_61_PI379238089	zaFBplate1_M02_003.ab1	zaFBplate1_M02_003.ab1_R	-0.160253	-0.109306	0.159126	-0.186812	0.17928	-0.174836
844	CUST_93_PI380567544	Ph_armadillo,	Ph_armadillo,	-0.939571	-0.661922	1.02349	0	1.14159	0
845	CUST_4697_PI379238085	3496216_4	Contig0401	0	0.146754	0.312603	0	0	0
846	CUST_223_PI380538642	zams14_L12_038	Contig0100	-1.67746	-0.662494	1.51183	0.890745	1.45505	0.732463
847	CUST_4557_PI379238085	3496358_2	3496358_2	-0.0845887	-0.0188061	-0.0671198	0.256956	0.0463532	0.362288
848	CUST_2421_PI379238085	3496613_4	3496613_4	0.367774	0.352652	-0.313281	-0.247302	-0.174451	-0.26
849	CUST_3951_PI379238085	3501475_4	3501475_4	0	0.0455235	0.175483	0	-0.177341	0
850	CUST_371_PI380538644	zams20_B10_047	zams20_B10_047.ab1	-0.153555	0	0	0	0	0
851	CUST_92_PI380538644	zams20_C17_077	zams20_C17_077.ab1	0	0	0	0	0	0
852	CUST_213_PI379238087	zaFBplate1_P18_065.ab1	zaFBplate1_P18_065.ab1_F	-0.52509	-0.571899	0.815074	0.356919	0.755959	0.206714
853	(+)E1A_r60_a97	E1A_r60_a97	E1A_r60_a97	0.667862	0.447982	0.700387	0.202276	0.813259	0.385123
854	CUST_781_PI379238085	3510873_2	Contig0751	0.0427082	0.0934161	0.0602489	0.224575	0.215378	-0.0130762
855	CUST_524_PI380538644	zams20_M10_035	Contig0203	-0.0768683	0.162238	-0.108858	0	0	-0.06003
856	CUST_1780_PI379238085	3496786_2	Contig0502	-0.119809	-0.0552451	0.211894	0.0881335	0.210565	0.00514911
857	CUST_1256_PI379238085	3497829_1	3497829_1	0	0	0	0	0	-0.109012
858	CUST_6634_PI379238085	3496497_2	Contig0453	1.67663	1.59035	-1.4454	-0.609102	-1.23174	-0.810273
859	CUST_256_PI380538646	zams25_N15_052	zams25_N15_052.ab1	0	0	0	0	0	0
860	CUST_5412_PI379238085	3500252_4	Contig0807	-0.19201	-0.176094	0.0988335	0.138585	0.125049	0.0707906
861	CUST_2160_PI379238085	3501771_1	3501771_1	0	0	0	0	0	0
862	CUST_5833_PI379238085	3509025_1	#N/A	0.976948	0.909685	-0.600179	-0.799163	-0.558153	-0.773187
863	CUST_3779_PI379238085	3501646_1	3501646_1	2.02569	1.91936	-2.27994	-2.40194	-1.99436	-2.11165
864	CUST_6549_PI379238085	3496618_3	3496618_3	-0.180807	-0.206013	0.375154	0.00249034	0.392599	-0.039606
865	CUST_30_PI380567544	DQ917572.1	DQ917572.1	-0.630765	-0.714392	0.696279	0	1.00051	0
866	CUST_7695_PI379238085	3495951_2	3495951_2	-0.160984	-0.20077	0.0586566	0.0502553	0.099636	-0.0172627
867	CUST_6209_PI379238085	3497021_5	Contig0537	-0.477567	0	0.0791828	0	0	0
868	CUST_7643_PI379238085	3496467_1	3496467_1	-0.156203	-0.168673	-0.0510684	0.14036	0.0407726	0.0916595
869	CUST_42_PI380538648	zamn06_D17_077	zamn06_D17_077.ab1	0	-0.0636755	0.101862	0	0	0
870	CUST_2940_PI379238085	3502730_2	3502730_2	1.54131	2.06528	-2.21812	-0.877045	-2.34885	-0.858671
871	CUST_2430_PI379238085	3496590_1	3496590_1	0.377725	0	-0.322569	0	0	0
872	CUST_5763_PI379238085	3505921_1	3505921_1	-0.123798	-0.103707	0.278401	0.313603	0.272546	0.243532
873	CUST_343_PI380538650	zamn07_I23_088	zamn07_I23_088.ab1	0	-0.109368	0	0	0	0
874	CUST_69_PI380567544	Ph_Wnt-C,	Ph_Wnt-C,	-0.192467	0	0	0	0	0
875	CUST_3827_PI379238085	3497769_1	#N/A	0.319096	0.130414	-0.176068	0.248849	-0.110215	0.522221
876	CUST_4219_PI379238085	3498372_3	3498372_3	-0.677138	-0.889923	0.900303	0	0.784246	0
877	CUST_5910_PI379238085	3501153_3	Contig0867	0.270402	0.30412	-0.106697	-0.0255715	-0.129013	0.0532398
878	CUST_107_PI380538642	zams17_C01_013	Contig0233	-0.836408	-0.896365	0.647301	0.728116	0.672023	0.696336
879	CUST_105_PI380538646	zams25_N01_003	zams25_N01_003.ab1	0	0	0	0	0.380652	0
880	CUST_1344_PI379238085	3506619_2	3506619_2	0.024775	0.0236369	-0.0128584	0.340316	-0.0562761	0.186879
881	CUST_147_PI379238089	zaFBplate1_J18_071.ab1	zaFBplate1_J18_071.ab1_R	-0.151653	0	-0.15759	0	-0.157958	0
882	CUST_3655_PI379238085	3503147_2	Contig0093_ext	-1.78917	-1.79625	2.08407	2.04618	2.00611	2.07472
883	CUST_9020_PI379238085	3501183_2	3501183_2	0.225615	0.190426	-0.572423	0	-0.216047	0
884	CUST_472_PI380538642	zams15_E16_060	zams15_E16_060.ab1	-0.133669	0	0	0	-0.294253	0
885	CUST_40_PI380567544	DQ827722.1	DQ827722.1	0	0	0	0	-0.337945	0
886	CUST_8477_PI379238085	3498388_2	#N/A	0.0620885	0.0418505	-0.165622	0.11707	-0.164211	0.188101
887	CUST_1951_PI379238085	3509948_2	3509948_2	0.753922	0.576987	-0.590936	0	-0.305501	0
888	CUST_304_PI380538646	zams25_O18_065	zams25_O18_065.ab1	-0.879186	-0.704479	0.915593	0	0.0932294	0
889	CUST_492_PI380538648	zamn02_M08_020	#N/A	0	0	0	0	-0.24209	0
890	CUST_97_PI379238087	zaFBplate1_K14_053.ab1	#N/A	0.5059	0.547543	-0.266593	-0.67353	-0.340439	-0.646323
891	CUST_252_PI380538648	zamn06_B14_063	zamn06_B14_063.ab1	-0.286458	-0.3433	0.641709	0	0.0385667	0
892	CUST_6995_PI379238085	3499906_1	3499906_1	0	0.214616	-0.385047	0	0	0
893	CUST_5601_PI379238085	3496273_1	Contig0417	0.22928	0.209973	-0.236202	-0.608644	-0.284767	-0.586356
894	CUST_5825_PI379238085	3497926_3	3497926_3	0.70789	0.234322	-0.674681	0	-0.300298	0
895	CUST_369_PI380538640	zams08_O12_034	zams08_O12_034.ab1	-0.0760324	0.0033068	0.143277	-0.142756	0.0606064	0
896	CUST_4161_PI379238085	3496373_1	#N/A	-0.308796	-0.257644	0.402487	0.582948	0.367531	0.715073
897	CUST_411_PI380538650	zamn06_I10_039	Contig0866	0.559994	0.609799	-0.409011	-0.529804	-0.464981	-0.384995
898	CUST_2277_PI379238085	3510666_1	3510666_1	-0.315806	0	0	0	0	0
899	CUST_4443_PI379238085	3499311_1	3499311_1	-0.0906492	-0.107901	-0.030181	0.278073	0.0807216	0.248929
900	CUST_5606_PI379238085	3502073_1	3502073_1	-1.28076	-0.968887	1.14608	0.330756	1.08229	0.402751
901	CUST_8710_PI379238085	3496040_4	Contig0372	0	0	0	0	0	0
902	CUST_181_PI380538636	zams01_A05_031	zams01_A05_031.ab1	-0.0373631	0	0	0	0	0
903	CUST_369_PI380538642	zams17_J11_040	#N/A	0	0	-0.150148	0	0	0.0367942
904	CUST_36_PI380567544	DQ827722.1	DQ827722.1	0	0	0	0	0	0
905	(+)E1A_r60_n11	E1A_r60_n11	E1A_r60_n11	-0.820179	-0.572373	-0.459202	-0.0101429	0.186536	0
906	CUST_100_PI379238085	3496681_2	#N/A	1.04246	1.02286	-1.06459	-0.466492	-0.966082	-0.175432
907	(+)E1A_r60_a107	E1A_r60_a107	E1A_r60_a107	-0.398574	-0.387473	-0.0162475	-0.154818	0.0427284	-0.151658
908	CUST_1166_PI379238085	3497571_1	Contig0057	-0.385279	-0.356274	0.483742	0.212904	0.449493	0.255122
909	CUST_247_PI380538648	zamn04_D04_014	zamn04_D04_014.ab1	0.0889967	0.0846775	-0.0322172	0.280844	-0.0602366	0.341949
910	CUST_4308_PI379238085	3496155_1	3496155_1	-0.540266	-0.327728	0.725092	0	0.65417	0
911	CUST_4089_PI379238085	3505042_2	3505042_2	0	0	0	0	0	0
912	CUST_3449_PI379238085	3504445_1	3504445_1	0	0	0	0	0	0
913	CUST_2830_PI379238085	3503090_1	3503090_1	-0.774638	-0.695803	0.515339	0.333415	0.552481	0.498686
914	CUST_3685_PI379238085	3508314_1	3508314_1	0.579966	0.521694	-0.641263	0.00931586	-0.612858	0.180736
915	CUST_22_PI380538646	zams25_H05_025	Contig0217_ext	0	0	0	0	0	0
916	CUST_5680_PI379238085	3496660_1	#N/A	-0.200151	-0.154719	0.2739	0.329198	0.306967	0.371424
917	CUST_400_PI379238085	3509145_1	3509145_1	0	0	0	0	0	0
918	CUST_2899_PI379238085	3503931_2	Contig0963	0	0	0.253681	0	0.239884	0
919	CUST_408_PI380538644	zams18_N19_068	#N/A	-0.491949	-0.506051	0.67682	0.420651	0.705669	0.548503
920	CUST_6708_PI379238085	3501165_1	Contig0871_ext	0.764547	0.819144	-0.663137	-0.0460812	-0.661488	0.205841
921	CUST_1973_PI379238085	3505021_1	3505021_1	-0.739087	-1.02535	0.397782	0	0.720691	0
922	CUST_2847_PI379238085	3502905_1	3502905_1	0	-0.0788842	0.302344	0	0.141111	0
923	CUST_39_PI380538648	zamn02_I23_088	#N/A	0	0	0	0	0	0
924	(+)E1A_r60_a107	E1A_r60_a107	E1A_r60_a107	-0.353469	-0.34905	-0.0625535	-0.213161	-0.0218876	-0.134303
925	CUST_6845_PI379238085	3497751_2	Contig0618	-1.75941	-1.705	1.85426	0.796475	1.73302	0.799114
926	CUST_8021_PI379238085	3496183_2	3496183_2	0.221999	0.00270011	-0.137315	0	0.0731667	0
927	CUST_278_PI380538636	zams02_M10_035	zams02_M10_035.ab1	0	0.173147	0	0	0	0
928	CUST_7990_PI379238085	3501464_1	#N/A	0.689318	0.813709	-0.571612	-0.922998	-0.504944	-0.862399
929	CUST_6030_PI379238085	3501324_2	Contig0896	-0.0609504	-0.155937	-0.279758	0	0.039434	0.0734677
930	CUST_329_PI380538648	zamn04_C13_061	zamn04_C13_061.ab1	0	0	0	0	0	0
931	CUST_197_PI380538644	zams20_I24_088	zams20_I24_088.ab1	-0.871904	-0.790709	0.425769	0	0.909208	0.14618
932	CUST_8793_PI379238085	3495813_2	Contig0324	0.186625	0.244435	-0.117423	-0.308418	-0.112747	-0.3333
933	CUST_425_PI380538640	zams08_H03_010	zams08_H03_010.ab1	0	0	0	0	0	-0.0745697
934	CUST_4368_PI379238085	3506559_1	3506559_1	-0.166708	-0.34758	0.262106	0	0.367421	-0.171328
935	CUST_2476_PI379238085	3499584_1	3499584_1	-0.389121	-0.315803	0.382219	0.486564	0.37453	0.28771
936	CUST_1_PI380538648	zamn05_M02_003	zamn05_M02_003.ab1	0	0.214786	0.434107	0	0.262501	-0.165117
937	CUST_261_PI380538650	zamn07_A16_064	Contig0092	0.259454	0.308639	-0.0935705	-0.213006	-0.0792943	-0.25282
938	CUST_2628_PI379238085	3498526_3	3498526_3	0.352694	0.374862	-0.339605	-0.533964	-0.33616	-0.583222
939	CUST_3207_PI379238085	3496691_3	Contig0479	0.19827	0.227406	-0.105004	-0.0732398	-0.0916685	-0.163677
940	CUST_223_PI380538644	zams21_K09_037	zams21_K09_037.ab1	-0.26759	0.0627213	0.516433	0	0.332643	0
941	CUST_7270_PI379238085	3498888_1	3498888_1	0.783704	0.811508	-0.568996	0	-0.683731	0
942	CUST_6321_PI379238085	3507008_2	3507008_2	0.203619	0.300132	-0.49663	0	-0.575022	0
943	CUST_465_PI379238085	3498992_1	#N/A	-0.160357	-0.193024	0.112184	-0.23109	0.165924	-0.106584
944	CUST_302_PI380538646	zams23_E22_091	zams23_E22_091.ab1	-0.42389	-0.617944	1.07797	0	1.06021	0.166717
945	CUST_463_PI380538642	zams15_O14_049	Contig0198	0	0	0	0	0	0
946	CUST_6926_PI379238085	3502280_1	3502280_1	-0.190157	-0.19371	0.336225	0.464545	0.374362	0.40485
947	CUST_114_PI380567544	DQ827721.1	DQ827721.1	0.269337	0.0549642	-0.188412	0	-0.266293	-0.0227419
948	CUST_95_PI380567544	Ph_armadillo,	Ph_armadillo,	-0.733355	-1.23559	0.978592	0.246288	1.2319	0.404409
949	CUST_376_PI380538644	zams19_D04_014	zams19_D04_014.ab1	0	0	0	0	0	0
950	CUST_137_PI379238087	zaFBplate1_H01_009.ab1	Contig0305	-0.551124	-0.583318	0.433641	0.311139	0.519787	0.256254
951	CUST_3335_PI379238085	3496313_3	Contig0421	0.0331376	0.0415729	0.0523026	0.45392	0.0578569	0.416376
952	CUST_4045_PI379238085	3496172_6	3496172_6	-0.000656637	-0.112939	0.06564	0.0885076	0.0771252	0.0159504
953	CUST_5432_PI379238085	3510293_1	3510293_1	-1.289	-1.31268	1.47739	0.803257	1.47371	0.777877
954	CUST_8471_PI379238085	3498464_1	3498464_1	-1.01223	-0.972032	1.33809	0.462859	1.27083	0.272974
955	CUST_118_PI379238087	zaFBplate1_C16_062.ab1	Contig0297	-1.94874	-1.83229	2.10911	1.68661	2.11192	1.68853
956	RC3	RC3	RC3	0	0	0	0	0	0
957	CUST_7256_PI379238085	3507932_1	3507932_1	0	0	0	0	0	0
958	CUST_7144_PI379238085	3507976_2	3507976_2	0.469121	0.189097	-0.545155	0	-0.136767	0
959	CUST_8734_PI379238085	3503247_2	3503247_2	0	0	0	0	0	0
960	CUST_4811_PI379238085	3503771_2	3503771_2	0.354175	0.225815	-0.603606	0	0	0
961	CUST_119_PI380538636	zams01_E04_012	Contig0556	0.389708	0.387869	-0.343636	-0.20754	-0.405237	-0.220413
962	CUST_3933_PI379238085	3496315_1	3496315_1	0.237402	0.279925	-0.111429	-0.261069	-0.152527	-0.220939
963	CUST_81_PI380567544	DQ827719.1	DQ827719.1	-0.0933049	0	0	0	-0.152123	0
964	CUST_2403_PI379238085	3501364_1	3501364_1	-0.283788	-0.0450453	0.257041	0	-0.178797	0
965	CUST_135_PI380538644	zams21_K01_005	#N/A	0	0	0	0	-0.294876	0
966	CUST_293_PI379238087	zaFBplate1_P04_002.ab1	zaFBplate1_P04_002.ab1_F	0.532062	0.421187	-0.265826	0	-0.190879	0
967	CUST_6211_PI379238085	3505273_2	3505273_2	-2.0834	-1.94667	2.15145	1.23513	0.891175	1.19294
968	CUST_58_PI379238087	zaFBplate1_O08_018.ab1	zaFBplate1_O08_018.ab1_F	-0.832481	-0.550623	0.62315	0.500669	0.316814	0.572631
969	CUST_7617_PI379238085	3505511_1	#N/A	-0.631746	-0.649936	0.810091	0.763619	0.614818	0.742304
970	CUST_301_PI380538642	zams15_N21_083	zams15_N21_083.ab1	0	0	0	0	-0.233501	0
971	CUST_8342_PI379238085	3496563_4	3496563_4	2.4479	2.40059	-2.40791	-2.46338	-1.75853	-2.41726
972	CUST_41_PI380567544	Ph_tinman,	Ph_tinman,	0	0	0	0	-0.349302	0
973	CUST_144_PI380538644	zams20_C08_030	zams20_C08_030.ab1	0	0	0	0	-0.485555	0
974	CUST_4996_PI379238085	3507157_2	3507157_2	0.0210915	0.125449	-0.0173422	0.112459	0.0353459	0.0573501
975	CUST_5937_PI379238085	3497256_1	Contig0570	-0.242377	-0.200251	0.321659	1.88951	0.277833	1.87501
976	CUST_602_PI379238085	3500789_1	3500789_1	1.16138	1.20307	-0.967313	-1.4987	-1.02436	-1.43299
977	CUST_5778_PI379238085	3499614_5	3499614_5	0.37772	0.4618	-0.450572	0	-0.36533	0
978	CUST_6346_PI379238085	3502735_2	3502735_2	-0.407117	0	0.339627	0	0.141993	0
979	CUST_6390_PI379238085	3500616_1	Contig0932	1.06958	0.845195	-1.01491	-0.681486	-0.830887	-0.593022
980	CUST_6757_PI379238085	3501067_2	3501067_2	-0.084942	0.0147755	-0.023649	0	0.185712	0
981	CUST_377_PI380538638	zams07_I11_040	zams07_I11_040.ab1	-0.25195	-0.205659	0.349787	0.229335	0.35086	0.388496
982	CUST_6687_PI379238085	3498533_1	Contig1029	0	0	0	0	0	0
983	CUST_111_PI380567544	DQ827721.1	DQ827721.1	0	0	0	0	0	0
984	CUST_7202_PI379238085	3501308_1	3501308_1	0.0292687	-0.0227939	0.0746942	0.136967	0.120759	0.239777
985	CUST_6330_PI379238085	3501331_2	3501331_2	1.77742	1.84525	-1.73503	0	-1.75487	0.0412885
986	CUST_4639_PI379238085	3500448_2	Contig0821_ext	1.41297	1.41643	-1.28007	0	-1.32626	0
987	CUST_6607_PI379238085	3502827_1	3502827_1	-0.32146	0	0	0	0.142756	0
988	CUST_333_PI380538636	zams02_K12_038	zams02_K12_038.ab1	-1.26132	-1.41896	1.35651	1.23896	1.39722	1.31982
989	CUST_117_PI380567544	Ph_PL10,	Ph_PL10,	-0.318012	-0.894719	0.486616	0	0.520217	0
990	CUST_3596_PI379238085	3500607_1	3500607_1	-0.231112	-0.258034	0.256783	0.705114	0.285124	0.573675
991	CUST_54_PI380538650	zamn02_B15_064	Contig0742_ext	0.490703	0.485125	-0.592525	-0.574014	-0.55165	-0.498955
992	CUST_6249_PI379238085	3504301_2	3504301_2	0	0	0	0	0	0
993	CUST_296_PI380538644	zams20_L02_005	#N/A	-0.542986	-0.559465	0.665093	0.42016	0.68133	0.528209
994	CUST_5779_PI379238085	3499614_4	3499614_4	0.789225	0.861229	-0.710127	-0.782664	-0.698422	-0.712741
995	CUST_7591_PI379238085	3497614_2	3497614_2	0.543497	0.672603	-0.441022	-0.211851	-0.42375	-0.155968
996	CUST_370_PI380538638	zams06_O02_001	zams06_O02_001.ab1	0	0	0	0	0	0
997	CUST_2433_PI379238085	3498710_1	3498710_1	0.352271	0.421761	-0.462551	-0.387716	-0.477127	-0.296606
998	CUST_5604_PI379238085	3498294_2	3498294_2	0.103665	0.0170503	0.03923	0.363597	0.0752228	0.542227
999	CUST_2190_PI379238085	3496944_2	Contig0526	0.0931331	0.0953913	-0.200545	-0.373051	-0.138103	-0.234428
1000	CUST_303_PI380538640	zams09_B02_015	#N/A	0	0	0	0	0	0
1001	CUST_1470_PI379238085	3499098_2	3499098_2	0	0	-0.200433	0	-0.167798	0
1002	CUST_9036_PI379238085	3500211_1	3500211_1	-0.549815	-0.524281	0.582347	0.88532	0.641257	0.893145
1003	CUST_188_PI380538648	zamn01_N19_068	Contig0023_ext	0	0	0	0	0	0
1004	CUST_4_PI380567544	DQ827723.1	DQ827723.1	0.307507	0.292146	-0.293882	-0.171354	-0.272014	0.00109424
1005	CUST_4_PI380538644	zams21_I18_071	zams21_I18_071.ab1	0	0	0	0	0	0
1006	CUST_409_PI380538642	zams16_A21_095	zams16_A21_095.ab1	0	0	0	0	0	0
1007	CUST_770_PI379238085	3497670_5	Contig0609	0.0609615	0.082475	-0.0694289	0.20807	-0.0690176	0.215324
1008	CUST_785_PI379238085	3496546_1	3496546_1	-0.409913	-0.365245	0.559429	0.927295	0.545664	0.953151
1009	CUST_9253_PI379238085	3501568_3	3501568_3	1.94154	1.25056	-1.86899	0	-1.79859	0
1010	CUST_7788_PI379238085	3496319_3	Contig0423	0.237135	0.262057	-0.176493	-0.052566	-0.136834	-0.105146
1011	CUST_447_PI380538646	zams22_H18_073	zams22_H18_073.ab1	-1.45447	-1.47188	1.55121	0.618862	1.47823	0.751244
1012	CUST_3232_PI379238085	3495998_3	#N/A	1.04899	1.13039	-1.02892	-1.47988	-1.03449	-1.3911
1013	CUST_3305_PI379238085	3506080_2	Contig0988	-0.271539	-0.242088	0.27492	0.171058	0.265587	0.127631
1014	CUST_40_PI379238087	zaFBplate1_E19_076.ab1	zaFBplate1_E19_076.ab1_F	-0.533131	-0.575942	0.672887	0	0.807148	0.0620122
1015	CUST_1423_PI379238085	3509137_1	3509137_1	-0.458568	-0.479524	0.950903	0.873065	1.0084	0.686646
1016	CUST_1369_PI379238085	3505170_2	3505170_2	-0.0942406	0	0	0	0	-0.238692
1017	CUST_4692_PI379238085	3507205_2	3507205_2	0	0	0	0	0	-0.212651
1018	CUST_114_PI380538640	zams13_B16_064	Contig0266	0	0	0	0	0	-0.135593
1019	CUST_3999_PI379238085	3510113_2	#N/A	-0.0554843	0.0526135	0.0431028	0.496592	0.141752	0.402462
1020	CUST_58_PI380567544	Ph_Wnt-Z,	Ph_Wnt-Z,	0	0	0	0	0	0.0468237
1021	CUST_603_PI379238085	3502909_2	3502909_2	-0.541404	-0.533926	0.556695	0.340326	0.519581	0.259926
1022	CUST_117_PI380538638	zams07_O21_081	Contig0223	0	0	0	0	0	0
1023	CUST_20_PI380567544	Ph_Wnt-Y,	Ph_Wnt-Y,	0	0	0	0	0	0
1024	CUST_8890_PI379238085	3500013_3	3500013_3	0	0.182384	0	0	0	0
1025	CUST_9280_PI379238085	3499455_1	3499455_1	0.53982	0.519266	-0.562165	-1.09432	-0.460546	-1.05478
1026	CUST_3123_PI379238085	3497662_1	3497662_1	0.853597	0.788882	-0.794578	-1.40424	-0.784126	-1.25068
1027	CUST_264_PI379238087	zaFBplate1_M14_051.ab1	zaFBplate1_M14_051.ab1_F	0.456773	0	0.127923	0	0	0
1028	CUST_6278_PI379238085	3500516_1	3500516_1	-0.037194	-0.139059	-0.0115893	-0.116962	-0.0151778	-0.0449985
1029	CUST_95_PI380538644	zams19_M22_083	zams19_M22_083.ab1	-1.28073	-1.65564	1.87634	0.577563	1.83061	0.661697
1030	CUST_8880_PI379238085	3510007_2	3510007_2	0	0	0	0	0	0
1031	CUST_451_PI380538646	zams24_B16_064	zams24_B16_064.ab1	0.194294	0	-0.0176941	0	0	0
1032	CUST_3790_PI379238085	3505764_1	3505764_1	-0.410274	-0.473484	0.265061	0.432392	0.582104	0.424752
1033	CUST_8211_PI379238085	3508153_2	3508153_2	-0.705278	-0.848979	0.913899	0	0.767038	0
1034	CUST_176_PI379238085	3508469_1	3508469_1	1.19439	1.24382	-1.34766	-0.985042	-1.28236	-0.9108
1035	CUST_7222_PI379238085	3504862_2	3504862_2	-0.000313421	-0.643453	0.899709	0	0.760273	0
1036	CUST_3681_PI379238085	3501459_1	#N/A	-0.283678	-0.264315	0.437862	0.502052	0.453168	0.454518
1037	CUST_59_PI380567544	Ph_Wnt-Z,	Ph_Wnt-Z,	0	-0.00407984	0	0	0	0
1038	CUST_539_PI379238085	3504672_1	3504672_1	-0.606279	-0.465957	0.314209	0	0.555986	0
1039	CUST_6990_PI379238085	3501641_1	3501641_1	0.291057	-0.227869	-0.0959512	0	0.0529798	0
1040	CUST_68_PI380567544	Ph_Wnt-C,	Ph_Wnt-C,	-0.164902	0	0.206451	0	0	0
1041	CUST_2957_PI379238085	3510243_2	Contig1035	0	0	-0.141974	0	0	0
1042	CUST_5647_PI379238085	3498219_2	3498219_2	1.35252	1.2002	-1.14598	0	-1.39019	0
1043	CUST_4314_PI379238085	3497689_1	Contig0610	1.74283	1.72853	-1.50582	0	-1.5655	0
1044	CUST_99_PI380567544	Ph_Wnt-Gr2,	Ph_Wnt-Gr2,	0.54896	-0.0622361	-0.271972	0	-0.266206	0
1045	CUST_456_PI380538640	zams09_E06_027	#N/A	0	0	0	0	-0.186531	0
1046	CUST_9174_PI379238085	3509493_1	3509493_1	-1.71468	-1.56175	1.67258	0.479308	0.463097	0.477062
1047	CUST_508_PI379238085	3496366_2	Contig0429	-0.248072	-0.193363	0.350861	-0.267501	0.324315	-0.256868
1048	CUST_5556_PI379238085	3498339_1	Contig0761	1.18255	1.13247	-1.06785	-1.11329	-1.04775	-1.32622
1049	CUST_80_PI380567544	Ph_brachyury	Ph_brachyury	0	0	0	0	-0.20974	0
1050	CUST_3166_PI379238085	3499298_1	3499298_1	0.827639	0.783914	-0.977746	-1.42134	-0.844888	-1.32132
1051	CUST_604_PI379238085	3502909_2	3502909_2	-0.51445	-0.547955	0.469701	0.358142	0.38812	0.461408
1052	CUST_5271_PI379238085	3498034_3	Contig0645	0.655246	0.656336	-0.689052	-1.09022	-0.657045	-0.983988
1053	CUST_24_PI380538650	zamn03_G09_041	zamn03_G09_041.ab1	0	0	0	0	-0.306626	0
1054	CUST_7486_PI379238085	3497810_2	#N/A	-0.215602	-0.220394	0.484059	0.566157	0.206346	0.635898
1055	CUST_9142_PI379238085	3497630_1	#N/A	-0.0621194	-0.126602	-0.0413033	0.196306	-0.0949618	0.328606
1056	CUST_12_PI380567544	DQ917570.1	DQ917570.1	-1.29223	-1.57492	1.19179	0.568276	0.920925	0.608617
1057	CUST_1167_PI379238085	3500733_1	3500733_1	0	0	0	0	0	0
1058	CUST_4174_PI379238085	3496297_1	Contig0418	0.602097	0.31283	0.0172926	0	-0.233652	0
1059	CUST_258_PI380538640	zams09_I15_056	#N/A	0	0	0	0	0	0
1060	CUST_6461_PI379238085	3509749_2	3509749_2	-1.09897	-1.14089	1.32202	0.1465	1.05838	0.146936
1061	CUST_7038_PI379238085	3505252_2	3505252_2	-0.236882	-0.256421	0.268484	-0.0581565	0.287905	-0.0186252
1062	CUST_5786_PI379238085	3497494_1	3497494_1	-0.268373	-0.28918	0.325703	0.0466747	0.312356	0.111346
1063	CUST_656_PI379238085	3508196_1	3508196_1	0	0	0	0	0	0
1064	CUST_94_PI380538638	zams04_B24_096	#N/A	0	0	0	0	0	0
1065	CUST_384_PI380538646	zams24_J14_055	zams24_J14_055.ab1	-0.380662	0	0	0	0	0
1066	CUST_98_PI380567544	Ph_Wnt-Gr2,	Ph_Wnt-Gr2,	0.309456	0.0561516	-0.474286	0	0.0142288	0.392459
1067	CUST_466_PI380538644	zams19_H08_026	zams19_H08_026.ab1	0.112498	0.152738	0.0675106	0.0817777	0.0633734	0.10338
1068	CUST_1664_PI379238085	3497092_3	Contig0546	-0.30621	-0.308589	0.365427	0.318997	0.338593	0.341051
1069	CUST_211_PI380538642	zams16_B19_080	Contig0143	-0.160381	-0.211142	0.224452	0.510415	0.24644	0.562352
1070	CUST_111_PI380567544	DQ827721.1	DQ827721.1	0	0	0	0	0	0
1071	CUST_9125_PI379238085	3497307_1	3497307_1	0.771939	0.763753	-0.700007	-0.873009	-0.774142	-0.665177
1072	CUST_70_PI380538646	zams23_A07_032	#N/A	0	0	-0.357366	0	0	0
1073	CUST_404_PI380538650	zamn07_M15_052	zamn07_M15_052.ab1	-0.718899	-0.43005	0.649444	0	0.44445	0
1074	CUST_3281_PI379238085	3504437_1	3504437_1	-0.00958601	-0.0809773	0.0200718	0.0716573	0.0927013	0.268355
1075	CUST_6457_PI379238085	3510711_2	3510711_2	0.205912	0.247567	-0.107212	-0.624976	-0.107539	-0.552948
1076	CUST_52_PI380567544	Ph_Wnt-Gr1,	Ph_Wnt-Gr1,	0	0.15233	0.0773506	0	0.28406	0
1077	CUST_9099_PI379238085	3496258_1	3496258_1	0.968908	1.06058	-0.929537	-1.05063	-0.999579	-0.949489
1078	CUST_6297_PI379238085	3508752_1	3508752_1	0	0	-0.229842	0	0	0
1079	CUST_6291_PI379238085	3496306_4	Contig0420	0.323632	0.302596	-0.374423	0.0953295	-0.360207	0.198636
1080	CUST_189_PI379238085	3504836_1	3504836_1	-0.433364	-0.611173	0.681489	0.633914	0.752518	0.759976
1081	CUST_6315_PI379238085	3495886_2	3495886_2	0.226208	0.292932	-0.208719	0.224551	-0.157564	0.207914
1082	CUST_57_PI380567544	Ph_Wnt-Z,	Ph_Wnt-Z,	0.17827	-0.157309	-0.0712267	0	0	0
1083	CUST_8907_PI379238085	3497691_3	3497691_3	-0.112014	0	0	0	0	0
1084	CUST_2061_PI379238085	3496795_2	Contig0507	1.39415	1.51723	-1.47124	-1.43829	-1.48518	-1.37318
1085	CUST_149_PI380538638	zams04_G11_042	zams04_G11_042.ab1	0	0	0	0	0	0
1086	CUST_2994_PI379238085	3496325_4	3496325_4	0	0	0	0	0	0
1087	CUST_6181_PI379238085	3500969_3	Contig0855	2.44071	2.51341	-2.6431	0	-2.64167	0
1088	CUST_281_PI380538650	zamn04_E02_011	zamn04_E02_011.ab1	0	0	0	0	0	0
1089	CUST_123_PI380567544	DQ917573.1	DQ917573.1	0.500584	0.537442	-0.610003	0	-0.499363	0
1090	CUST_58_PI380538644	zams20_H13_057	Contig0965	-0.369065	-0.234674	0.620615	0.264331	0.622908	0.127595
1091	CUST_7472_PI379238085	3500159_2	Contig0803	-0.149327	-0.142431	0.207018	0.439215	0.264723	0.381733
1092	CUST_8063_PI379238085	3501699_1	3501699_1	0.569216	0.0920658	0.00468644	0	-0.0090172	0
1093	CUST_7004_PI379238085	3502969_1	3502969_1	0.853101	0.893555	-0.88054	-1.36134	-0.819025	-1.24203
1094	CUST_1_PI380567544	DQ827723.1	DQ827723.1	0.306883	0.334063	-0.245697	-0.122113	-0.267278	-0.131227
1095	CUST_41_PI380538642	zams13_I16_056	Contig0558	-0.358724	-0.476357	0.696885	-0.177095	0.343079	-0.0978164
1096	(-)3xSLv1	NegativeControl	NegativeControl	0	0	0.0197787	0	0	0
1097	CUST_6298_PI379238085	3508752_1	3508752_1	0	0	0	0	0	0
1098	CUST_319_PI380538642	zams13_J05_023	#N/A	0	0	0	0	0	0
1099	CUST_1933_PI379238085	3497631_3	Contig0605	0.0947119	-0.0527991	-0.13047	-0.176513	-0.0264492	-0.169221
1100	CUST_7423_PI379238085	3498575_1	Contig0695	-0.185197	-0.0877411	0.273947	0.117368	0.278052	0.065337
1101	CUST_134_PI380538648	zamn06_K14_053	zamn06_K14_053.ab1	0	0	0	0	0	0
1102	CUST_240_PI380538640	zams07_D10_045	Contig0109	-1.93228	-1.87961	2.09216	0.842104	1.97486	0.783818
1103	CUST_6371_PI379238085	3497885_1	Contig0634_ext	-0.216392	-0.209721	0.326174	0.154552	0.351523	0.0984069
1104	CUST_384_PI380538648	zamn06_L05_021	#N/A	0.218053	0.245143	-0.14636	0	0.00609106	-0.106809
1105	CUST_4_PI380538646	zams23_A01_015	zams23_A01_015.ab1	0	0.243498	0	0	0	0
1106	CUST_339_PI380538646	zams23_G21_089	zams23_G21_089.ab1	0	-0.202704	0	0	0	0
1107	CUST_34_PI380538638	zams04_H12_042	Contig1009	-1.07541	-1.22561	1.14929	0.756915	1.26217	0.702832
1108	CUST_137_PI379238089	zaFBplate1_H01_009.ab1	Contig0305	-0.0937442	-0.20486	0.0418984	0	0.400499	0
1109	CUST_4589_PI379238085	3498024_3	3498024_3	0.102024	0.0487901	0.0308389	-0.106245	-0.0104237	-0.179193
1110	CUST_47_PI380567544	Ph_Wnt-B,	Ph_Wnt-B,	-0.153262	0	0	0	0.0631994	0
1111	CUST_2701_PI379238085	3506832_2	3506832_2	0.362741	0	0.343178	0	0.1961	0
1112	CUST_353_PI380538640	zams11_B08_032	#N/A	-0.0682437	0	0	0	0	0
1113	CUST_2228_PI379238085	3496437_1	3496437_1	0.101329	0.0429967	0.0898553	0.378725	0.0944982	0.279649
1114	CUST_9_PI379238087	zaFBplate1_D07_030.ab1	zaFBplate1_D07_030.ab1_F	-1.41006	-1.88632	1.47402	0.891507	1.7236	0.890949
1115	CUST_9246_PI379238085	3502185_1	3502185_1	0.200254	0.297302	-0.14455	0.219825	-0.049145	0.0844585
1116	CUST_274_PI380538642	zams16_E10_043	#N/A	-0.802297	-1.05199	1.10532	0	0.964915	0
1117	CUST_2095_PI379238085	3498730_2	3498730_2	-2.02729	-1.57547	1.37237	1.4132	1.80348	1.38284
1118	CUST_280_PI380538644	zams20_K07_022	#N/A	-1.24874	-1.16366	1.25354	0.84881	1.46464	0.667375
1119	CUST_5398_PI379238085	3505365_1	3505365_1	-0.268997	-0.236389	0.0830549	0	0.130939	0
1120	CUST_7209_PI379238085	3496965_3	Contig0530	1.48154	1.43357	-1.38932	-0.865083	-1.44772	-0.659013
1121	CUST_990_PI379238085	3498454_2	3498454_2	-0.476021	-0.601787	0.514262	0.778278	0.613483	0.752144
1122	CUST_7087_PI379238085	3496169_3	3496169_3	0.78783	0.963371	-1.35245	0	-1.29921	0
1123	CUST_9216_PI379238085	3497101_1	Contig0547	-0.054333	-0.151644	0.00788385	0.514676	0.0057759	0.574476
1124	CUST_252_PI380538640	zams08_C01_013	#N/A	0	0	0	0	0	0
1125	CUST_9322_PI379238085	3497336_1	Contig0576	0.0474366	0.0143977	-0.256345	-0.330301	-0.233367	-0.266512
1126	CUST_2795_PI379238085	3496264_5	3496264_5	1.07967	0.96862	-1.07145	0	-0.839564	0
1127	CUST_6128_PI379238085	3496070_2	3496070_2	1.21445	1.24008	-1.42371	0.404722	-1.31814	0.2466
1128	CUST_67_PI380567544	Ph_Wnt-C,	Ph_Wnt-C,	-0.319896	-0.0323625	0.481427	0	-0.180833	0
1129	CUST_5482_PI379238085	3495910_2	#N/A	0.129546	0.158098	0.0444061	-0.255352	0.0663041	-0.24977
1130	CUST_462_PI380538642	zams16_A17_079	Contig0250	0.344276	0	-0.0592952	0	-0.328713	0
1131	CUST_479_PI380538646	zams25_H10_041	#N/A	-0.0768184	-0.0924864	0.39787	-0.113029	0.352229	-0.0859823
1132	CUST_21_PI380567544	DQ827720.1	DQ827720.1	0	0	0	0	-0.255279	0
1133	CUST_1891_PI379238085	3506114_1	3506114_1	0.249151	0.0750816	-0.324468	0	-0.288926	0.182812
1134	CUST_4913_PI379238085	3496749_1	3496749_1	0.039479	-0.0111518	-0.0105305	0.0197519	-0.112099	0.392493
1135	CUST_4520_PI379238085	3495859_4	Contig0332	0.44863	0.465334	-0.366663	-0.104331	-0.405936	-0.061467
1136	CUST_913_PI379238085	3497019_2	3497019_2	-0.0407321	0.00320706	-0.0391177	0.203889	-0.045005	0.186025
1137	CUST_6392_PI379238085	3503254_2	3503254_2	0.905645	1.02069	-1.36847	-0.00214812	-0.686377	-0.228743
1138	CUST_60_PI380567544	Ph_Wnt-Z,	Ph_Wnt-Z,	0	0	0	0	0.186929	0
1139	CUST_5453_PI379238085	3499543_1	Contig0070	-0.0388251	-0.00277102	0.0554894	-0.0358617	0.0162804	0.0711106
1140	CUST_4065_PI379238085	3496959_2	Contig0529	0.772362	0.748894	-0.571152	0.0878569	-0.593974	0.0562159
1141	(+)E1A_r60_n9	E1A_r60_n9	E1A_r60_n9	-0.611849	-0.634571	-0.505248	-0.638324	-0.492017	-0.535753
1142	CUST_32_PI379238089	zaFBplate1_F16_060.ab1	zaFBplate1_F16_060.ab1_R	0	0	-0.164199	-1.28206	0	-1.14787
1143	CUST_9195_PI379238085	3496915_2	3496915_2	0	0	0	0	0	0
1144	CUST_5615_PI379238085	3497322_1	Contig0289_ext	0.445165	0.483782	-0.422922	-0.512039	-0.400038	-0.412365
1145	CUST_9137_PI379238085	3505829_1	3505829_1	0.090693	0.16627	0.242557	-0.300686	0.23198	-0.179369
1146	CUST_493_PI380538646	zams25_D10_045	zams25_D10_045.ab1	0	0	0	0	0	-0.0894876
1147	CUST_243_PI380538646	zams24_H13_057	#N/A	0	0	0	0	-0.136965	0.151129
1148	CUST_64_PI380538636	zams01_I21_087	#N/A	0.0759817	0.0554382	0.0957061	0.447295	0.0617985	0.458745
1149	CUST_5508_PI379238085	3498041_2	#N/A	-0.172583	-0.294416	0.318541	0.122521	0.391861	-0.0550529
1150	CUST_172_PI380538638	zams07_B09_047	Contig0256	-1.12653	-1.00732	1.17562	0	1.14912	0.173754
1151	CUST_267_PI379238087	zaFBplate1_E17_075.ab1	zaFBplate1_E17_075.ab1_F	0	0	-0.21664	0	-0.331278	0.198318
1152	CUST_4514_PI379238085	3506848_1	3506848_1	-0.494115	-1.00857	0.685111	0.426601	0.931876	0.445878
1153	CUST_132_PI380538638	zams05_P05_017	zams05_P05_017.ab1	0	0	0	0	0	0
1154	CUST_7418_PI379238085	3500333_1	3500333_1	-0.402975	-0.402215	0.398943	0.0529351	0.426978	0.126324
1155	CUST_381_PI380538636	zams03_I03_008	zams03_I03_008.ab1	0	0	0	0	0	0
1156	CUST_5721_PI379238085	3496486_1	3496486_1	0.0453565	-0.0914599	-0.207951	0	0.0129698	0.269085
1157	CUST_3925_PI379238085	3499384_2	Contig0766	1.61032	1.16815	-1.68973	0	-1.55317	0
1158	(+)E1A_r60_a104	E1A_r60_a104	E1A_r60_a104	0.480182	0.503821	0.721938	0.642749	0.773944	0.713704
1159	CUST_115_PI380538640	zams10_L15_054	#N/A	0.264853	0.17506	-0.102175	0	-0.221732	0
1160	CUST_1083_PI379238085	3498740_3	3498740_3	0.755413	0.826388	-0.899001	-0.912189	-0.81113	-0.780254
1161	CUST_6928_PI379238085	3497960_3	3497960_3	-0.00364623	-0.407125	0.0611821	0	0.184855	0
1162	CUST_1200_PI379238085	3495883_4	Contig0335	0.0206583	0.00292582	0.0662647	0	0.0475882	0
1163	CUST_7015_PI379238085	3496738_4	Contig0493	2.03485	2.05658	-1.77374	0	-1.66673	0
1164	CUST_1092_PI379238085	3503923_2	3503923_2	-0.460149	-0.414517	0.510496	0.451929	0.492561	0.629729
1165	CUST_3994_PI379238085	3496217_3	Contig0402	0.15614	0.25667	-0.16048	-0.319877	-0.102295	-0.273186
1166	CUST_1298_PI379238085	3509355_1	3509355_1	-0.154946	-0.605388	0.165218	0	0.439304	0
1167	CUST_213_PI380538646	zams24_K05_021	zams24_K05_021.ab1	0	0	0	0	0	0
1168	CUST_457_PI380538646	zams24_L17_069	zams24_L17_069.ab1	0	0	0	0	0	0
1169	CUST_248_PI380538638	zams07_G07_026	#N/A	-1.50308	-1.39188	1.51338	1.08467	1.5848	1.06128
1170	CUST_6528_PI379238085	3498283_1	3498283_1	0.316627	0.364941	-0.327122	-0.330985	-0.296696	-0.283278
1171	CUST_2668_PI379238085	3509924_2	Contig0478	0.349668	0.412372	-0.225945	0.666854	-0.24354	0.718598
1172	CUST_735_PI379238085	3500347_2	3500347_2	0	0	0	0	0	0
1173	CUST_3016_PI379238085	3503605_1	3503605_1	0	0	0	0	0	0
1174	CUST_214_PI379238089	zaFBplate1_G15_058.ab1	zaFBplate1_G15_058.ab1_R	0.678655	0.549176	-0.504704	-0.826184	-0.301148	-0.636808
1175	CUST_2876_PI379238085	3503015_1	3503015_1	0.581645	-0.382193	0.00236623	0	-0.410797	-0.0489808
1176	CUST_782_PI379238085	3510873_2	Contig0751	-0.0424572	-0.033311	0.198648	0.190384	0.207448	0.0549141
1177	CUST_302_PI380538644	zams20_I19_072	zams20_I19_072.ab1	-0.0840745	-0.0788035	0.263297	0	0.437207	0
1178	CUST_1233_PI379238085	3496425_1	3496425_1	0	0	0	0	0	0
1179	CUST_455_PI380538640	zams08_M09_035	#N/A	0	0	0	0	0	0
1180	(+)E1A_r60_a104	E1A_r60_a104	E1A_r60_a104	0.506068	0.463405	0.713123	0.654894	0.699369	0.615185
1181	CUST_7708_PI379238085	3498536_1	Contig0694	1.16983	1.27453	-0.978189	-1.68741	-1.0294	-1.46634
1182	CUST_2625_PI379238085	3510401_1	#N/A	-0.332836	-0.372039	0.428441	0.179134	0.645607	0.109686
1183	CUST_523_PI380538646	zams22_O20_066	zams22_O20_066.ab1	0	0	0	0	0	0
1184	CUST_3439_PI379238085	3495984_2	#N/A	-0.133819	-0.0788188	0.308725	0.667625	0.327352	0.611455
1185	CUST_7804_PI379238085	3509814_2	3509814_2	-1.24614	-1.15409	1.28767	0	1.21293	0.0449413
1186	CUST_3359_PI379238085	3499814_2	Contig0784	-0.0859419	-0.0717844	-0.0873031	0.153635	-0.0337474	0.0512682
1187	CUST_1036_PI379238085	3502566_2	3502566_2	0	0	0.0981663	0	0	0
1188	CUST_3677_PI379238085	3495811_1	Contig0323	0.567997	0.604471	-0.412129	-0.806278	-0.393515	-0.768439
1189	CUST_175_PI380538638	zams04_M10_035	zams04_M10_035.ab1	-0.0407784	-0.097693	0.167514	0	0.0879594	0
1190	CUST_35_PI380538638	zams05_D02_013	zams05_D02_013.ab1	0	0	0	0	0	0
1191	CUST_9266_PI379238085	3501213_2	Contig0880	-0.977676	-0.975874	0.984085	0.855718	0.943975	0.804175
1192	CUST_2010_PI379238085	3496409_2	#N/A	0.208316	0.193368	-0.163115	0.0344571	-0.124309	-0.0306206
1193	CUST_9046_PI379238085	3508825_2	3508825_2	0	0	0	0	0	0
1194	CUST_255_PI380538648	zamn01_E08_028	zamn01_E08_028.ab1	-1.13007	-1.13214	1.24374	1.50404	1.28413	1.41445
1195	CUST_5389_PI379238085	3503268_1	3503268_1	-0.287743	0	0	0	0	0
1196	CUST_223_PI380538638	zams06_J17_071	#N/A	0	0	0	0	0	0
1197	CUST_9167_PI379238085	3498603_3	3498603_3	-0.0402899	-0.0508111	0.106808	0.0280843	0.124009	0.189076
1198	CUST_7594_PI379238085	3498079_4	Contig0652	0.326189	0.288793	-0.366218	-0.337336	-0.333908	-0.476083
1199	CUST_7050_PI379238085	3507197_1	3507197_1	0.98183	0.529665	-0.509116	0	-0.577453	0
1200	CUST_498_PI380538644	zams21_K13_053	#N/A	0.334333	0	-0.242894	0	0	0
1201	CUST_327_PI380538650	zamn07_G23_090	zamn07_G23_090.ab1	0.11619	0	0	0	0	0
1202	CUST_2120_PI379238085	3497606_1	3497606_1	0.584637	0.606541	-0.45847	0	-0.335442	0
1203	CUST_38_PI380538646	zams22_J13_055	zams22_J13_055.ab1	-0.280829	-0.776704	0.441838	0.0153853	1.01924	0.227125
1204	CUST_452_PI380538646	zams23_E07_028	zams23_E07_028.ab1	0	0	0	0	0	0
1205	CUST_1341_PI379238085	3496323_1	Contig0425	0.818663	0.865889	-0.824864	-0.790911	-0.859621	-0.704367
1206	CUST_3973_PI379238085	3501044_1	Contig0859	-0.178173	-0.215231	0.367035	0.347336	0.378879	0.40271
1207	CUST_7739_PI379238085	3496470_3	3496470_3	0	0	0	0	0.049367	0
1208	CUST_4270_PI379238085	3498198_5	Contig0666	0.332681	0.320439	-0.116535	-0.290943	-0.0445375	-0.288523
1209	CUST_129_PI380538636	zams03_L06_021	#N/A	0.439823	-0.0619778	-0.28571	0	0.0435819	0
1210	CUST_4584_PI379238085	3498100_1	3498100_1	1.67031	1.633	-1.56226	0	-1.38827	0
1211	CUST_555_PI380538646	zams23_C22_093	zams23_C22_093.ab1	0	0	0	0	-0.279924	0
1212	CUST_4055_PI379238085	3497576_1	3497576_1	-0.461468	-0.739117	0.485059	0	0.0225262	0
1213	CUST_9110_PI379238085	3499835_1	3499835_1	0.519682	0.667641	-0.872596	0	-0.238358	0
1214	CUST_3398_PI379238085	3498236_3	3498236_3	0	0	-0.523359	0	-0.240553	0
1215	CUST_2693_PI379238085	3507373_1	3507373_1	0.0258527	-0.0384479	-0.0065072	0.384327	-0.0453532	0.2904
1216	CUST_58_PI380567544	Ph_Wnt-Z,	Ph_Wnt-Z,	0.29786	0	0	0	-0.370253	0
1217	CUST_3497_PI379238085	3496602_4	3496602_4	0.174104	0	-0.437483	0	-0.232949	0
1218	CUST_7950_PI379238085	3496735_1	Contig0492	0.271344	0.191218	-0.0888003	-0.327568	-0.143522	-0.340811
1219	CUST_398_PI380538646	zams23_H06_025	zams23_H06_025.ab1	0	0	0	0	-0.195258	-0.04965
1220	CUST_2033_PI379238085	3501645_1	3501645_1	0	0	0.42822	0	-0.143633	0.257215
1221	CUST_6138_PI379238085	3507846_1	#N/A	1.02092	1.09063	-0.78787	-1.26055	-0.879069	-1.0826
1222	CUST_3370_PI379238085	3502877_2	3502877_2	0.227393	0.246025	0	0	-0.0473659	0
1223	CUST_2777_PI379238085	3499432_2	3499432_2	0.153451	0.010646	-0.0358834	0	0.215818	0.369545
1224	CUST_961_PI379238085	3505756_1	3505756_1	0.58431	0.403303	-0.26671	0	0	-0.0117228
1225	CUST_72_PI380567544	Ph_vasa,	Ph_vasa,	-1.35234	-1.27536	1.52213	0.913018	1.49281	0.970946
1226	CUST_6750_PI379238085	3507812_2	3507812_2	-0.362041	-0.348116	0.482074	0.563801	0.447668	0.524336
1227	CUST_5876_PI379238085	3506773_2	3506773_2	-0.674539	-0.504714	0.572368	0.029634	0.96568	0.0831898
1228	CUST_373_PI380538648	zamn03_O10_033	#N/A	0	0	0	0	0	-0.0490615
1229	CUST_31_PI380567544	Ph_Wnt-Gr3,	Ph_Wnt-Gr3,	0	0	0	0	0	0.116886
1230	CUST_2349_PI379238085	3496657_1	#N/A	-0.226129	-0.203788	0.329023	-0.0905955	0.255497	0.0414688
1231	CUST_6456_PI379238085	3497356_1	3497356_1	0.228216	0.0823229	-0.259741	0	-0.304114	-0.0994312
1232	CUST_3783_PI379238085	3506404_1	3506404_1	1.29441	1.16543	-1.07131	0	-1.19159	0.0436789
1233	CUST_8458_PI379238085	3504718_1	Contig0825_ext	0.149185	0.163081	-0.214123	-0.0230419	-0.129081	0.0529458
1234	CUST_1751_PI379238085	3508846_2	3508846_2	0.294001	0.218208	-0.23855	0.0475669	-0.100824	0.226647
1235	CUST_395_PI380538638	zams07_P05_017	Contig0177	0.37863	0.401639	-0.11547	-0.413122	-0.0780479	-0.357362
1236	CUST_4918_PI379238085	3501985_2	3501985_2	-0.80348	-0.754331	1.058	0	0.858195	0.318893
1237	CUST_8983_PI379238085	3509464_1	3509464_1	0.778406	0	-0.41794	0	-0.359313	0
1238	CUST_1389_PI379238085	3507978_2	3507978_2	0.241085	0.240767	-0.407432	-0.0480604	-0.172692	0.00048838
1239	CUST_113_PI380567544	DQ827721.1	DQ827721.1	0	0	0	0	0	0
1240	CUST_58_PI380567544	Ph_Wnt-Z,	Ph_Wnt-Z,	0	0.611976	0	0	0	0
1241	CUST_437_PI380538646	zams24_M22_083	zams24_M22_083.ab1	0	0.290581	-0.195259	0	0	0
1242	CUST_5895_PI379238085	3501607_2	3501607_2	0.243319	0	0	0	0	0
1243	CUST_998_PI379238085	3499934_1	3499934_1	-0.506247	-0.474007	0.497522	0.229572	0.555264	0.286188
1244	CUST_7118_PI379238085	3496730_3	3496730_3	1.30328	1.23477	-1.50908	-1.73536	-1.38785	-1.60269
1245	CUST_6768_PI379238085	3509402_1	3509402_1	-0.398814	-0.372475	0.316514	0.198339	0.703518	0.221035
1246	CUST_6978_PI379238085	3496329_1	3496329_1	-0.11395	-0.0761485	0.207605	0.0841606	0.235311	0.121595
1247	CUST_191_PI380538642	zams13_N22_083	#N/A	-0.00129576	-0.585077	-0.0748463	0	0.242488	0
1248	CUST_3749_PI379238085	3509980_1	3509980_1	0.966749	0.772799	-1.09812	0	-1.10183	0
1249	CUST_1701_PI379238085	3496044_1	3496044_1	0.14205	0.222541	-0.169787	0.381106	-0.111538	0.154383
1250	CUST_7796_PI379238085	3501555_2	#N/A	0.408671	0.515962	-0.46641	0.045731	-0.391672	0.117504
1251	CUST_64_PI380567544	Ph_nanos,	Ph_nanos,	-1.08976	-1.03667	1.22223	1.29716	1.27153	1.33343
1252	CUST_6284_PI379238085	3499299_2	#N/A	-0.203383	-0.167431	0.0763283	0	0.134303	0
1253	CUST_562_PI379238085	3499921_2	3499921_2	0.480013	0.478191	-0.377662	0	-0.319617	-0.0811444
1254	CUST_2944_PI379238085	3502730_1	Contig0990	0.808382	0.751012	-0.980738	0	-0.93509	-0.0166914
1255	CUST_80_PI380567544	Ph_brachyury	Ph_brachyury	0	-0.0309869	0	0	0	0
1256	CUST_9104_PI379238085	3499911_2	3499911_2	-0.404862	-0.0686255	0.0860911	0	-0.0995597	0
1257	CUST_84_PI380567544	DQ827719.1	DQ827719.1	0.0764584	0	0	0	0.0534571	0
1258	CUST_1616_PI379238085	3498865_1	3498865_1	-2.62043	-2.58695	2.45926	1.60155	2.67949	1.55526
1259	CUST_50_PI380567544	Ph_Wnt-B,	Ph_Wnt-B,	0	0	0	0	0	0
1260	CUST_3269_PI379238085	3505130_2	Contig0970_ext	0.0492086	-0.0204529	-0.00669766	0.313489	0.0136466	0.282443
1261	CUST_467_PI380538642	zams14_H17_073	zams14_H17_073.ab1	-0.195654	-0.264163	0.188342	0	0.248108	0
1262	CUST_36_PI380538648	zamn05_O10_033	Contig0085	0	0	0	0	0.0704458	0
1263	CUST_5_PI380538636	zams02_G16_058	Contig0360	-0.38546	-0.353212	0.52472	0.597615	0.522447	0.540508
1264	(+)E1A_r60_1	E1A_r60_1	E1A_r60_1	0.0733371	0.0969031	0.244279	0.179965	0.275498	0.13331
1265	CUST_224_PI380538636	zams01_A10_047	Contig0098	0.385864	0.293542	-0.322597	-0.792717	-0.342605	-0.772901
1266	CUST_3674_PI379238085	3495811_2	Contig0323	0.445541	0.455772	-0.184909	-0.332898	-0.14681	-0.354179
1267	CUST_3995_PI379238085	3496217_2	Contig0402_ext	0.418609	0.470045	-0.27135	-0.475332	-0.237555	-0.537749
1268	CUST_174_PI379238087	zaFBplate1_A21_095.ab1	zaFBplate1_A21_095.ab1_F	-0.399277	-0.317559	0.47046	0	0	0
1269	CUST_56_PI380538640	zams11_K23_086	#N/A	0	0.351132	0.121573	0	0	0
1270	CUST_4213_PI379238085	3510625_1	3510625_1	-0.820716	-0.559187	0.873996	0.271232	1.22503	0.439842
1271	CUST_90_PI379238089	zaFBplate1_C11_046.ab1	zaFBplate1_C11_046.ab1_R	-1.31844	-1.29801	1.30381	0.417328	1.34213	0.389812
1272	CUST_7641_PI379238085	3500246_2	3500246_2	0	0	-0.197285	0	0	0
1273	CUST_2960_PI379238085	3510243_1	3510243_1	0.897286	0.922699	-0.955844	0	-0.457032	0
1274	CUST_2691_PI379238085	3497024_1	3497024_1	0.39108	0.402098	-0.226538	0	-0.128146	0
1275	CUST_82_PI380567544	DQ827719.1	DQ827719.1	-0.308686	0	0	0	0	0
1276	CUST_73_PI380538642	zams13_F17_075	zams13_F17_075.ab1	-0.0528276	0	0	0	0	0
1277	CUST_3821_PI379238085	3497769_5	3497769_5	-0.097547	-0.452932	0.361796	0	0.490963	0
1278	CUST_3127_PI379238085	3510077_1	3510077_1	0	0	-0.11967	0	0	0
1279	CUST_401_PI380538646	zams24_F13_059	#N/A	-0.747883	-0.961147	1.18824	0.469928	1.04748	0.523329
1280	CUST_929_PI379238085	3495838_4	Contig0328	0.423299	0.377106	-0.45853	-0.222524	-0.403634	-0.276305
1281	(+)E1A_r60_n11	E1A_r60_n11	E1A_r60_n11	-0.533016	-0.477368	-0.201406	-0.101792	-0.0215743	-0.0736536
1282	CUST_318_PI380538636	zams02_C09_045	Contig0410	-0.322802	-0.364414	0.342365	0.236865	0.364043	0.150148
1283	CUST_6718_PI379238085	3508020_1	3508020_1	-0.183469	-0.299511	0.10032	0.209909	0.246658	0.351468
1284	CUST_304_PI380538650	zamn05_K19_070	Contig0398	0.308054	0.284108	-0.100235	-0.0164973	-0.0880892	-0.0659275
1285	CUST_1235_PI379238085	3500181_1	3500181_1	-0.82371	-0.851409	0.783895	0.641475	1.0112	0.679234
1286	CUST_94_PI380538648	zamn01_G14_057	Contig0012	-0.225548	0	0.0716502	0	0.112376	0
1287	CUST_4922_PI379238085	3496697_5	Contig0482	0.739302	0.4999	-0.850808	0	-0.468214	0
1288	CUST_229_PI380538638	zams05_F22_091	Contig0170	0	0	0	0	0	0
1289	CUST_5222_PI379238085	3509908_1	3509908_1	-0.169666	-0.226154	0.229873	0	0.250301	0
1290	CUST_2640_PI379238085	3495865_1	Contig0333	0.951671	0.99136	-0.622874	-1.07428	-0.638638	-1.03395
1291	CUST_71_PI380567544	Ph_vasa,	Ph_vasa,	-1.268	-1.16485	1.44752	0.919615	1.37607	0.901074
1292	CUST_1149_PI379238085	3496038_4	Contig0371	1.85531	1.8481	-1.47378	0	-1.53533	0
1293	CUST_338_PI380538646	zams23_O06_017	zams23_O06_017.ab1	-0.255385	0	0	0	-0.254147	0
1294	CUST_7130_PI379238085	3505039_1	3505039_1	-0.103261	0	0	0	-0.330074	0
1295	CUST_8523_PI379238085	3500824_1	3500824_1	0.373851	0.345361	-0.17622	-0.573126	-0.221737	-0.563551
1296	CUST_462_PI380538640	zams10_H03_010	Contig0369_ext	0.146827	0.148564	-0.153337	-0.520112	-0.172467	-0.377438
1297	CUST_176_PI379238087	zaFBplate1_A01_015.ab1	#N/A	0.295791	0.246312	-0.269419	-0.198457	-0.282522	-0.0646449
1298	CUST_4644_PI379238085	3504642_2	3504642_2	0.295872	0.154576	-0.110045	0	-0.104594	-0.08605
1299	CUST_27_PI379238085	3496824_1	#N/A	0.125998	0.137052	0.093603	0.247175	0.047391	0.275647
1300	CUST_3003_PI379238085	3510145_1	#N/A	0.0132152	0.031941	-0.0592837	0	-0.275752	0.274773
1301	CUST_413_PI380538640	zams08_B09_047	zams08_B09_047.ab1	0	0	-0.0141937	0	-0.372201	0.234876
1302	CUST_460_PI380538640	zams11_I20_072	zams11_I20_072.ab1	-0.169297	-0.168922	0.19572	0.269079	0.176031	0.207064
1303	CUST_439_PI380538650	zamn03_I12_040	zamn03_I12_040.ab1	0	0	0	0	0	0
1304	CUST_8248_PI379238085	3498190_1	Contig0664	0.230428	0.26812	-0.139388	0.149043	-0.133558	0.154286
1305	CUST_209_PI379238085	3502240_1	3502240_1	0	0	0	0	0	-0.194324
1306	CUST_1086_PI379238085	3498740_2	Contig0712	0.645773	0.689759	-0.590879	0	-0.378955	0.143446
1307	CUST_6700_PI379238085	3501165_3	Contig0871	0.736427	0.769436	-0.584911	0	-0.509536	0.176988
1308	CUST_75_PI380567544	Ph_vasa,	Ph_vasa,	-0.948625	-0.923941	1.09225	0.67371	1.07936	0.660133
1309	CUST_7538_PI379238085	3510005_1	3510005_1	-0.508557	-0.431213	0.395594	0.717607	0.447682	0.486439
1310	CUST_7517_PI379238085	3506119_1	3506119_1	-0.693498	-0.537201	0.438365	0	0.555826	-0.134891
1311	CUST_2696_PI379238085	3496407_6	#N/A	-0.0285978	0.00980696	0.0158791	0.327111	-0.0226259	0.370858
1312	CUST_64_PI379238089	zaFBplate1_M05_019.ab1	#N/A	0.791529	0.432843	-0.951481	0	-0.550671	0.348652
1313	CUST_3092_PI379238085	3496712_2	Contig0485	0.0613523	0.0524651	0.283538	0.315663	0.212861	0.0286803
1314	CUST_6244_PI379238085	3498425_3	3498425_3	-0.209022	0.185904	-0.274186	0	-0.13056	0.0452472
1315	CUST_3414_PI379238085	3496700_1	Contig0727_ext	1.5685	1.48639	-1.56926	0	-1.55059	-0.0139342
1316	CUST_77_PI380567544	Ph_brachyury	Ph_brachyury	0	0	0	0	0	0
1317	CUST_190_PI380538636	zams03_N23_084	zams03_N23_084.ab1	0	0	0	0	0	0
1318	ETG05_66023	ETG05_66023	ETG05_66023	0.150987	0.0918336	-0.0543596	0	0.0962396	0
1319	CUST_473_PI379238085	3505001_1	3505001_1	-0.442871	0.0356253	0.44904	0	0.0649529	0
1320	CUST_3358_PI379238085	3499814_3	Contig0785	-0.0896797	-0.0875487	0.125499	0.109247	0.154477	0.143326
1321	CUST_8582_PI379238085	3505839_2	3505839_2	0	0.212074	0	0	0	0
1322	CUST_5735_PI379238085	3498076_3	Contig0651	-1.1394	-0.752797	1.46437	0.420918	1.04412	0.596179
1323	CUST_1088_PI379238085	3498740_1	Contig0712	0.494662	0.295053	-0.545266	0	-0.672372	0
1324	CUST_5214_PI379238085	3501218_4	Contig0881	0.114865	0.228484	-0.0974613	0.0356711	-0.0931994	0.0589226
1325	CUST_121_PI380538636	zams03_N19_068	#N/A	-0.19543	-0.21752	0.443202	-0.640722	0.542281	-0.479709
1326	CUST_9191_PI379238085	3508369_2	3508369_2	0.0556564	-0.213054	-0.131281	0	0.159606	0
1327	CUST_324_PI380538636	zams02_P19_066	Contig0138	-0.194801	-0.200136	0.273343	0.126915	0.315578	0.172769
1328	CUST_1345_PI379238085	3506619_1	Contig0996	-0.637859	-0.525821	0.58883	0.571063	0.629953	0.563178
1329	CUST_527_PI380538646	zams22_F10_043	zams22_F10_043.ab1	0	0	0	0	0	0
1330	CUST_3562_PI379238085	3504747_2	3504747_2	-0.572763	-0.580708	0.40966	0	0.217308	0
1331	(-)3xSLv1	NegativeControl	NegativeControl	0	0	0	0	0	0
1332	CUST_2856_PI379238085	3497215_3	#N/A	0.666124	0.771588	-0.481516	-0.109713	-0.440873	-0.103046
1333	CUST_3770_PI379238085	3498560_2	Contig1009	-0.78886	-0.712667	0.744367	0.653654	0.776033	0.564156
1334	CUST_2620_PI379238085	3499067_4	Contig0300	-0.067977	-0.363477	-0.0291213	0	0.0242533	0
1335	CUST_232_PI380538638	zams06_I04_008	zams06_I04_008.ab1	0	0	0	0	0	0
1336	CUST_40_PI380538636	zams02_H20_074	Contig0237_ext	0.668803	0.747321	-0.508924	-0.414496	-0.48057	-0.36649
1337	CUST_4630_PI379238085	3505690_1	3505690_1	-0.337074	-0.320562	0.453372	0.431792	0.489547	0.343854
1338	CUST_7716_PI379238085	3497919_2	3497919_2	0	0.0868871	0.131293	0	-0.194749	-0.0305329
1339	CUST_339_PI380538644	zams19_G10_041	#N/A	0	0	0.025003	0	0.150269	0
1340	CUST_1995_PI379238085	3507882_1	Contig1012	-1.13667	-0.953485	1.13555	0	1.03581	0
1341	CUST_80_PI380567544	Ph_brachyury	Ph_brachyury	0	0	0	0	0	0
1342	CUST_1631_PI379238085	3508806_1	3508806_1	-0.0677637	-0.0302491	-0.0344237	-0.370416	0.0124536	-0.445382
1343	CUST_77_PI380567544	Ph_brachyury	Ph_brachyury	0	0	0	0	0	0
1344	CUST_8851_PI379238085	3508218_1	Contig1014	0.320528	0	0	0	0	0
1345	CUST_2350_PI379238085	3496657_1	Contig0476	-0.152535	-0.168694	0.166769	-0.0472568	0.160989	-0.265433
1346	CUST_5294_PI379238085	3499060_1	3499060_1	-0.112932	-0.280002	0.311101	0	0.289686	0
1347	CUST_2572_PI379238085	3495963_2	3495963_2	0.0659036	-0.00246191	-0.254532	-0.623334	-0.0562219	-0.568555
1348	CUST_5887_PI379238085	3495807_1	Contig0322	0.428769	0.473172	-0.320078	-0.237549	-0.30049	-0.286234
1349	CUST_5028_PI379238085	3500863_2	3500863_2	0	0	0.334782	0	0	0
1350	CUST_1656_PI379238085	3500601_2	3500601_2	-0.0179977	-0.103243	0.0747879	0.155296	0.110213	0.0873675
1351	CUST_4176_PI379238085	3508766_1	3508766_1	-2.16511	-2.09026	2.10454	0.966201	2.11887	0.904892
1352	CUST_4870_PI379238085	3500096_1	Contig1018	1.72614	1.45298	-1.62871	0	-1.56943	0
1353	CUST_1570_PI379238085	3497052_3	Contig0542_ext	0.268395	0.231478	0.154578	0	-0.0223618	0
1354	CUST_6023_PI379238085	3497621_2	Contig0603	-0.0852594	-0.157325	0.282258	0.379278	0.297153	0.331964
1355	CUST_190_PI380538648	zamn05_M12_036	#N/A	0.710119	0.734736	-0.449458	0	-0.18018	0
1356	CUST_1398_PI379238085	3504962_2	3504962_2	-0.517166	-0.949374	0.33654	0.0314346	0.267785	0.134595
1357	CUST_6194_PI379238085	3501155_3	Contig0868	0.468592	0.482338	-0.400001	-0.00742893	-0.380903	-0.0920552
1358	CUST_10_PI380538638	zams04_H06_025	zams04_H06_025.ab1	-0.601899	-0.807381	0.52344	0.374131	0.639188	0.256461
1359	CUST_179_PI380538644	zams18_F01_011	zams18_F01_011.ab1	-0.00183668	0	0	0	0	0
1360	CUST_8922_PI379238085	3497260_1	3497260_1	-0.244125	-0.301892	0.264412	0.622642	0.301104	0.730573
1361	CUST_1679_PI379238085	3496399_3	3496399_3	0.182965	-0.0313764	0.256351	0	-0.127146	0
1362	CUST_2730_PI379238085	3501212_1	Contig0879	0.230481	0.104796	-0.164232	0	-0.257158	0
1363	CUST_143_PI379238087	zaFBplate1_E08_028.ab1	zaFBplate1_E08_028.ab1_F	-0.404608	-0.200928	0.604327	0	0.318614	0
1364	CUST_445_PI380538644	zams19_J15_056	#N/A	-0.153445	-0.248756	0.233095	-0.383067	0.261268	-0.500655
1365	CUST_4337_PI379238085	3496694_4	Contig0481	0.687152	0.598229	-0.605861	-0.622473	-0.552145	-0.574175
1366	CUST_2865_PI379238085	3496651_1	3496651_1	0	-0.0626812	-0.172383	0	0	0
1367	CUST_6876_PI379238085	3499265_1	3499265_1	0.260869	0.197503	-0.135946	0	-0.0352197	0
1368	CUST_531_PI380538640	zams08_F19_076	#N/A	0	0.260501	0	0	0	0
1369	CUST_1821_PI379238085	3497911_1	#N/A	0.611686	0.409669	-0.440721	0	-0.377142	0
1370	CUST_7728_PI379238085	3509018_1	3509018_1	-0.502305	-0.548432	0.150592	0	0.856239	0.201939
1371	CUST_491_PI380538642	zams17_K12_038	zams17_K12_038.ab1	0	0	0	0	0	0
1372	CUST_294_PI380538636	zams02_L12_038	#N/A	0	0.406381	0	0	0	0
1373	CUST_2008_PI379238085	3506834_1	3506834_1	-0.430321	-0.125361	0.427929	0.281892	0.670115	0.171107
1374	CUST_5011_PI379238085	3497800_1	3497800_1	-1.36477	-1.62237	1.29169	0.546667	0.622824	0.468997
1375	CUST_2279_PI379238085	3497032_4	Contig0540	1.15398	0.717231	-1.25168	0	-0.295416	0
1376	CUST_54_PI379238087	zaFBplate1_F02_011.ab1	zaFBplate1_F02_011.ab1_F	-0.187814	0	0.575807	0	-0.153761	0
1377	CUST_522_PI380538646	zams23_O14_049	zams23_O14_049.ab1	-0.474514	-0.455083	0.791824	0	-0.155948	0
1378	CUST_7405_PI379238085	3497171_1	3497171_1	0.691989	0.619032	-0.664541	-0.229704	-0.548975	-0.185152
1379	CUST_4385_PI379238085	3497312_2	Contig0574	-1.1522	-0.70246	0.687168	0.141006	0.0494725	0.363583
1380	CUST_1799_PI379238085	3506803_1	3506803_1	0.204059	-0.0919014	-0.676707	0	-0.286439	-0.184577
1381	CUST_348_PI380538640	zams10_A08_032	Contig0143_ext	-0.188637	-0.220249	0.236291	0.48883	0.0693104	0.307506
1382	CUST_6131_PI379238085	3498091_1	3498091_1	-0.593733	-0.443304	0.538172	0	-0.302489	0
1383	CUST_542_PI379238085	3499005_1	Contig0733	1.40276	1.32293	-1.24316	-1.68856	-1.23648	-1.38802
1384	CUST_4805_PI379238085	3495798_2	3495798_2	0.109392	0.101476	0.0249832	0.315197	-0.001581	0.364059
1385	CUST_9306_PI379238085	3497843_1	3497843_1	1.13395	1.10472	-1.00349	0	-1.06832	0.241249
1386	CUST_7_PI380567544	Ph_Wnt-A,	Ph_Wnt-A,	0.0967138	0.0962313	0.0390015	0	-0.0547518	0
1387	CUST_8821_PI379238085	3499348_2	Contig0763	0.268476	0.266657	0.0137367	-0.209347	-0.00385638	-0.174226
1388	CUST_7987_PI379238085	3501464_2	#N/A	0.809454	0.86469	-0.602582	-1.06649	-0.656913	-0.925005
1389	CUST_8096_PI379238085	3497134_1	#N/A	0.0489732	0.0419948	-0.133223	0.2778	-0.157691	0.400814
1390	CUST_479_PI380538644	zams20_P09_033	#N/A	0	0	0	0	0	0
1391	CUST_6689_PI379238085	3508882_2	3508882_2	0.0870954	-0.173688	-0.322938	0	0	-0.0880972
1392	CUST_2275_PI379238085	3498867_2	3498867_2	-0.211602	-0.137566	0.39674	0	0.267814	0
1393	CUST_7882_PI379238085	3497149_2	Contig0961	0.672155	0.716159	-0.515238	-0.550737	-0.532793	-0.43306
1394	CUST_8959_PI379238085	3496885_2	3496885_2	-0.445208	-0.463396	0.506812	0.0743852	0.764988	0.341644
1395	CUST_5378_PI379238085	3496980_2	Contig0299	0.675431	0.6748	-0.47109	-0.718728	-0.457603	-0.715891
1396	CUST_2324_PI379238085	3497728_1	Contig0615	0.344335	0.681202	-0.888326	0	-0.443792	0.254182
1397	CUST_8069_PI379238085	3498205_1	3498205_1	-0.464614	-0.546971	0.293796	0.184992	0.371088	0.385786
1398	CUST_5783_PI379238085	3501273_1	Contig0887	-0.162281	-0.126268	0.248281	0.210758	0.258005	0.225965
1399	CUST_5691_PI379238085	3496077_1	3496077_1	0.166377	0.18203	-0.179375	-0.450074	-0.137699	-0.112022
1400	CUST_7293_PI379238085	3498286_2	3498286_2	0	0.264082	0	0	0	0
1401	CUST_4977_PI379238085	3507740_1	3507740_1	-0.903767	-0.794161	0.558517	0	0.559845	0.239815
1402	CUST_232_PI380538644	zams22_B13_063	zams22_B13_063.ab1	0.23156	0.232378	0	0	0.167141	0
1403	CUST_218_PI380538642	zams17_G02_009	Contig0190	0	0	0	0	0	0
1404	CUST_640_PI379238085	3496579_1	3496579_1	0.191195	0.289615	-0.268915	-0.350009	-0.198166	-0.0406677
1405	CUST_16_PI379238085	3508785_1	3508785_1	-0.354356	-0.104999	0.488649	0.123187	0.542643	0.399457
1406	CUST_557_PI379238085	3508737_1	3508737_1	0.195017	0.43751	-0.640987	0	-0.604103	0
1407	CUST_2466_PI379238085	3497487_4	3497487_4	-0.372816	-0.413119	0.429238	0.515866	0.440164	0.541583
1408	CUST_2168_PI379238085	3496104_2	3496104_2	0.0477011	0.059626	-0.169737	0	-0.0299015	0.167197
1409	CUST_474_PI380538640	zams10_K14_053	#N/A	0	0	0	0	0	0
1410	CUST_299_PI380538642	zams16_D04_014	#N/A	0	0	0	0	0	0
1411	CUST_204_PI380538636	zams03_G21_089	Contig0561	-0.187193	-0.162848	0.188227	0.0872941	0.219646	0.185305
1412	CUST_7176_PI379238085	3496201_1	Contig0398	0.16332	0.282636	-0.047293	0.0338355	0.00768591	0.086552
1413	CUST_4018_PI379238085	3497167_1	3497167_1	0.472964	0.53509	-0.606925	-0.984448	-0.591811	-0.934601
1414	CUST_374_PI380538650	zamn06_M11_036	zamn06_M11_036.ab1	0	0.269232	0	0	0	0
1415	CUST_1902_PI379238085	3504857_2	3504857_2	0.493478	-0.139106	-0.0942509	0	-0.0943283	0
1416	CUST_7013_PI379238085	3501058_1	#N/A	0.100182	0.19025	-0.121854	-0.13512	-0.0951908	-0.115284
1417	CUST_8232_PI379238085	3495983_2	Contig0356	2.31524	2.0015	-2.51996	0	-2.02574	0
1418	CUST_1828_PI379238085	3501538_3	3501538_3	1.61954	1.70518	-1.51885	-0.527846	-1.51373	-0.499464
1419	CUST_5305_PI379238085	3495782_2	3495782_2	0.300747	0.365975	-0.196729	-0.0201723	-0.186513	-0.0539608
1420	CUST_7002_PI379238085	3501210_1	Contig0877	-0.771989	-0.662764	0.708164	0.238732	0.768992	0.186523
1421	CUST_279_PI380538638	zams07_N07_020	zams07_N07_020.ab1	0	0	0	0	0	0
1422	CUST_1610_PI379238085	3498941_2	#N/A	0.121426	0.126646	-0.233395	0.296866	-0.0895485	0.0153259
1423	CUST_8636_PI379238085	3503697_2	3503697_2	-0.0932511	-0.309972	0.266136	0	0.145814	0
1424	CUST_78_PI379238085	3496272_2	#N/A	-0.122109	-0.185412	0.23665	0.0227701	0.252152	-0.0474565
1425	CUST_92_PI380567544	Ph_armadillo,	Ph_armadillo,	-0.962307	-0.988865	1.19926	0.14417	1.14851	0.140044
1426	CUST_1383_PI379238085	3498322_1	3498322_1	-0.313249	-0.128682	0.268307	0	0	0
1427	CUST_377_PI379238085	3497206_1	3497206_1	0.783005	0.805057	-0.871127	-1.60524	-0.888271	-1.45902
1428	CUST_52_PI380567544	Ph_Wnt-Gr1,	Ph_Wnt-Gr1,	-0.330015	-0.0770596	0.382729	0	0.257519	0
1429	CUST_598_PI379238085	3506088_2	3506088_2	0.304328	0	0	0	0	0
1430	CUST_407_PI380538640	zams09_M10_035	zams11_L23_086.ab1	-1.47452	-1.38895	1.38165	0.33857	1.28149	0.221391
1431	(+)E1A_r60_a20	E1A_r60_a20	E1A_r60_a20	-0.0421361	0.0503745	0.337382	0.292543	0.358015	0.205919
1432	CUST_5424_PI379238085	3499058_1	Contig0735	0.139782	0.179261	0.0123104	0.0242423	0.0607903	-0.0426064
1433	CUST_37_PI380538642	zams15_B09_047	Contig0410	-0.295312	-0.307434	0.329347	0.157288	0.334041	0.10219
1434	CUST_1471_PI379238085	3495972_1	Contig0353	0.357304	0.416626	-0.298491	-0.159686	-0.267597	-0.240267
1435	CUST_365_PI380538644	zams19_A22_095	Contig0671	-0.133235	-0.129633	0.330516	0.379781	0.355686	0.32872
1436	CUST_380_PI380538638	zams04_O10_033	zams04_O10_033.ab1	0.0630532	-0.295263	0	0	0	0
1437	CUST_173_PI380538650	zamn06_H10_041	zamn06_H10_041.ab1	0	0	0	0	-0.192855	0
1438	CUST_574_PI380538642	zams15_B23_096	Contig0238	-1.08652	-0.944308	0.903083	0	0.981869	0
1439	CUST_269_PI380538650	zamn02_G23_090	Contig0489	0.310325	0	0	0	0	0
1440	CUST_4267_PI379238085	3497733_3	3497733_3	-0.355152	-0.737869	0.991615	0	0.553943	0
1441	CUST_298_PI380538644	zams20_C20_078	Contig0139	-0.75264	-0.735283	0.943662	0	0.751974	0
1442	CUST_5245_PI379238085	3497008_1	Contig0534	0.142252	0.453799	-0.500075	0	0	0
1443	CUST_57_PI380538636	zams01_M15_052	Contig0104_ext	-0.96574	-0.883626	0.89808	0	0.755873	0
1444	CUST_4694_PI379238085	3505085_1	Contig0757	0.182933	0.182806	-0.148335	-0.16842	-0.130014	-0.232427
1445	CUST_476_PI380538640	zams11_J02_007	#N/A	0	0	0	0	0	0
1446	CUST_2484_PI379238085	3497132_1	Contig0552_ext	-0.817855	-1.18276	0.744888	0.407904	1.18932	0.24521
1447	CUST_2577_PI379238085	3495887_1	3495887_1	0.316516	0.143256	-0.615878	0	0	0
1448	CUST_1475_PI379238085	3497959_1	3497959_1	0	0	-0.670439	0	-0.448727	0
1449	CUST_3964_PI379238085	3506157_1	3506157_1	-0.599863	-0.672437	0.993534	0	0.851382	0
1450	CUST_5753_PI379238085	3496113_5	Contig0383	0.106852	0.175246	-0.0379245	0.229076	-0.0139113	0.21936
1451	CUST_2235_PI379238085	3495873_1	Contig0334	0.0827959	0.0880968	0.0640498	-0.217398	0.0705892	-0.146847
1452	CUST_2357_PI379238085	3496226_2	3496226_2	1.13019	1.12024	-1.02135	-1.40363	-1.10832	-1.17764
1453	CUST_8623_PI379238085	3501752_2	3501752_2	-0.931892	-0.886403	0.985224	0.892627	1.02059	0.581696
1454	CUST_4229_PI379238085	3497679_1	3497679_1	-0.0621554	-0.0666759	0.224838	0.428475	0.202476	0.264521
1455	CUST_7684_PI379238085	3499106_1	Contig0741	0.348405	0.342884	-0.288942	0.0554357	-0.331306	0.0120413
1456	CUST_7598_PI379238085	3498079_2	Contig0652_ext	0.661487	0.492082	-0.628709	0	-0.367763	-0.19645
1457	CUST_7851_PI379238085	3499268_1	3499268_1	0.197946	0	0	0	-0.123438	0
1458	CUST_31_PI380567544	Ph_Wnt-Gr3,	Ph_Wnt-Gr3,	0	0	0	0	-0.193	0
1459	CUST_69_PI380538642	zams16_F17_075	Contig0730	-0.68686	-0.734501	0.783638	0.444534	0.627294	0.247707
1460	CUST_7616_PI379238085	3496974_1	3496974_1	-0.203859	-0.239136	-0.260446	-0.280855	-0.230477	-0.253592
1461	(+)E1A_r60_a20	E1A_r60_a20	E1A_r60_a20	0.0037245	0.0174685	0.332617	0.283099	0.294927	0.297865
1462	CUST_8275_PI379238085	3502249_2	3502249_2	0.298589	0	0	0	-0.316692	0
1463	CUST_8715_PI379238085	3509050_2	3509050_2	0.825699	0.763799	-0.632752	-0.612777	-0.508005	-0.55111
1464	CUST_4672_PI379238085	3501043_2	3501043_2	-0.164865	-0.409294	-0.0169382	0.0437794	-0.0831056	0.475602
1465	CUST_59_PI380538642	zams15_J03_008	zams15_J03_008.ab1	0	0	0	0	-0.416352	0
1466	CUST_2286_PI379238085	3497296_1	3497296_1	0.0901898	-0.00580027	-0.0154127	0.114213	-0.0419156	-0.0388787
1467	CUST_2242_PI379238085	3504410_1	3504410_1	-0.749958	-0.728052	0.862128	0.722883	0.842102	0.703944
1468	CUST_8556_PI379238085	3505052_1	3505052_1	0.568382	0.537505	-0.697832	-0.0286312	-0.648709	-0.0264148
1469	CUST_4192_PI379238085	3506291_1	#N/A	0.176658	0.039544	-0.0319064	-0.0265955	0.0346439	-0.366497
1470	CUST_1916_PI379238085	3506878_1	3506878_1	-0.985225	-0.928286	1.0213	0.545013	1.02054	0.583311
1471	CUST_1838_PI379238085	3508294_2	3508294_2	-0.219934	0	0.0376614	0	0	-0.022439
1472	CUST_168_PI380538638	zams04_H17_073	zams04_H17_073.ab1	0	0	0	0	0	0
1473	CUST_3551_PI379238085	3497112_3	#N/A	0.782191	0.708414	-0.975807	0	-1.11209	-0.046648
1474	CUST_40_PI380538644	zams18_L21_085	Contig0141	-0.0914083	-0.0383463	0.236619	0.0290803	0.216118	0.110402
1475	CUST_2916_PI379238085	3499569_1	3499569_1	-1.25619	-1.11487	1.08118	0.181714	1.13884	0.484792
1476	CUST_532_PI380538642	zams15_D24_094	Contig0776	0.428495	0.484652	-0.290917	-0.649476	-0.279464	-0.641887
1477	CUST_4274_PI379238085	3498198_4	3498198_4	1.60714	1.63435	-1.43427	-1.93047	-1.43779	-1.4705
1478	CUST_540_PI380538642	zams15_N15_052	Contig0202	1.45164	1.55285	-1.59027	-0.367797	-1.54474	-0.426301
1479	CUST_8472_PI379238085	3498464_1	3498464_1	-0.996209	-0.873081	0.879192	0.334206	0.850068	0.418001
1480	CUST_6783_PI379238085	3499870_1	3499870_1	0.150451	0.162981	-0.0547244	-0.36939	-0.0744779	-0.353726
1481	CUST_16_PI380538642	zams17_G20_074	#N/A	0	0	0	0	-0.161359	0
1482	CUST_4241_PI379238085	3508237_1	#N/A	0.0131484	0.0531806	0.0350636	-0.289314	0.0657832	-0.232219
1483	CUST_6435_PI379238085	3497863_6	Contig0630	0.735811	0.842564	-0.757235	0	-0.549813	0
1484	CUST_957_PI379238085	3505756_2	3505756_2	0	0	0	0	0	0
1485	CUST_1290_PI379238085	3496421_1	3496421_1	-0.686803	-0.651717	0.607743	0.512939	0.649779	0.665133
1486	CUST_225_PI380538642	zams17_G12_042	zams17_G12_042.ab1	0	0	0	0	0	0
1487	CUST_5303_PI379238085	3498443_1	3498443_1	0.152337	0.237969	-0.395893	0	-0.453199	0
1488	CUST_4110_PI379238085	3497630_7	Contig0604	-0.23955	-0.287093	0.139117	-0.0888348	0.150459	0.15146
1489	CUST_494_PI380538640	zams10_J15_056	zams10_J15_056.ab1	0	0	0	0	0	0
1490	CUST_3787_PI379238085	3508425_2	3508425_2	-0.447228	-0.659525	0.964938	0	0.859021	0
1491	CUST_121_PI380567544	DQ917573.1	DQ917573.1	0.820032	0.469917	-0.800613	0	-0.553786	0
1492	CUST_7157_PI379238085	3496556_2	3496556_2	0.552294	0.587799	-0.508583	0.071521	-0.465437	0.292466
1493	CUST_834_PI379238085	3510851_1	3510851_1	0	0	0	0	0	0
1494	CUST_3725_PI379238085	3498529_1	3498529_1	0	0	0	0	0.0750654	0
1495	CUST_216_PI380538642	zams16_J13_055	Contig0184_ext	-1.17319	-1.36241	1.33727	0.542634	1.17931	0.561122
1496	CUST_100_PI380567544	Ph_Wnt-Gr2,	Ph_Wnt-Gr2,	0.0970066	0.35932	0.284789	0	0.112683	0
1497	CUST_2651_PI379238085	3498072_1	#N/A	0.647013	0.433026	-0.848497	-0.69533	-0.689748	-0.708323
1498	CUST_4122_PI379238085	3501223_3	Contig0096	0.271411	0.396941	-0.207941	0.590679	-0.171284	0.560355
1499	CUST_242_PI379238087	zaFBplate1_P16_050.ab1	Contig0873	0.518859	0.59732	-0.594144	-0.92445	-0.555589	-0.96647
1500	CUST_9342_PI379238085	3496265_1	Contig0415	0.58488	0.583443	-0.535914	-0.246013	-0.483796	-0.239884
1501	CUST_182_PI380538636	zams01_L03_006	Contig0842	0.43052	0.507665	-0.378442	-0.34608	-0.312201	-0.372449
1502	CUST_4730_PI379238085	3504357_2	3504357_2	0	0	0	0	-0.20448	0
1503	CUST_31_PI380567544	Ph_Wnt-Gr3,	Ph_Wnt-Gr3,	0	0	0	0	-0.576434	0
1504	CUST_6617_PI379238085	3499234_1	Contig0756_ext	0.164028	0.0730821	-0.00631867	0.187052	0.0268427	0.200506
1505	CUST_940_PI379238085	3504352_1	3504352_1	-1.14245	-0.999691	1.36402	0.901161	1.4194	0.886763
1506	(+)E1A_r60_a135	E1A_r60_a135	E1A_r60_a135	-0.209594	-0.346459	-0.141693	-0.281346	-0.0953	-0.252603
1507	CUST_2769_PI379238085	3497766_1	3497766_1	0.417702	0.381994	-0.298919	0	-0.170142	0
1508	CUST_4531_PI379238085	3506374_2	Contig0292	0	0.131477	-0.163904	0	0.0637052	0
1509	CUST_158_PI379238087	zaFBplate1_H20_074.ab1	zaFBplate1_H20_074.ab1_F	-1.02914	-1.06755	1.48619	0.610588	1.354	0.597808
1510	CUST_330_PI380538640	zams09_I24_088	#N/A	-0.395948	-0.640786	0.499337	0	0.292234	0
1511	CUST_21_PI380567544	DQ827720.1	DQ827720.1	0	0	0	0	0	0
1512	CUST_3437_PI379238085	3498645_1	3498645_1	0.205224	0.191764	-0.127077	-0.473028	-0.104767	-0.604202
1513	CUST_7079_PI379238085	3506149_2	3506149_2	1.26642	1.19997	-1.31437	0	-1.4275	0
1514	CUST_3935_PI379238085	3509325_1	3509325_1	1.18119	0.853134	-1.16787	-0.167185	-0.787796	-0.146342
1515	CUST_8682_PI379238085	3509481_2	3509481_2	0.177453	0.162395	-0.554053	0	-0.403713	0
1516	CUST_5014_PI379238085	3498265_1	Contig0676	-0.704058	-0.698116	0.819554	0.261261	0.800028	0.153248
1517	CUST_7692_PI379238085	3510341_1	3510341_1	-0.427595	-0.179196	0.0810723	0	0.502309	0
1518	CUST_5064_PI379238085	3510473_1	3510473_1	-0.225978	-0.396857	0.442707	0.322296	0.341604	0.414377
1519	CUST_139_PI380538646	zams23_A12_048	#N/A	-0.209604	-0.300499	0.28029	0.501619	0.326351	0.538186
1520	CUST_162_PI380538644	zams21_J02_007	zams21_J02_007.ab1	0.0653348	0.106084	0.196989	0.382207	0.222507	0.279711
1521	CUST_268_PI380538646	zams22_L01_005	#N/A	-0.0438236	-0.282495	0.128714	0	0.190303	0
1522	CUST_113_PI380567544	DQ827721.1	DQ827721.1	0	0	0	0	0	0
1523	CUST_197_PI380538636	zams02_M06_019	Contig0252	-0.931555	-0.743377	0.919882	0	0.766861	0
1524	CUST_367_PI380538648	zamn02_A21_095	zamn02_A21_095.ab1	0.288947	0.15164	-0.201886	-0.250337	-0.157594	-0.218302
1525	CUST_3157_PI379238085	3496736_1	3496736_1	1.46855	1.42752	-1.13415	-0.974176	-1.54703	-1.04183
1526	CUST_2_PI380567544	DQ827723.1	DQ827723.1	0.356136	0.283737	-0.29142	-0.138325	-0.249901	-0.101005
1527	CUST_4533_PI379238085	3506374_1	3506374_1	-0.189785	0.151575	0.361403	0	0.25159	0
1528	CUST_6942_PI379238085	3501232_3	Contig0883	0.846438	0.871127	-0.601323	-1.0288	-0.60677	-0.905695
1529	CUST_198_PI380538650	zamn07_A07_032	zamn07_A07_032.ab1	0	0	0	0	0	0
1530	CUST_4733_PI379238085	3504357_1	3504357_1	1.12354	1.12295	-0.898388	-1.20367	-0.894478	-1.12406
1531	CUST_514_PI380538644	zams20_E14_059	Contig0274	-1.11673	-0.916515	1.04493	0	1.04436	0.245521
1532	CUST_163_PI379238085	3502383_2	#N/A	0.286494	0.31771	-0.201956	-0.671067	-0.178726	-0.646957
1533	CUST_1029_PI379238085	3503183_2	3503183_2	0	0	0	0	0	0
1534	CUST_4544_PI379238085	3500644_1	Contig0836	-0.283909	-0.299956	0.268898	-0.0464324	0.266044	-0.0466274
1535	CUST_351_PI380538644	zams18_O20_066	#N/A	0	0	0	0	0	0
1536	CUST_4759_PI379238085	3500800_1	Contig0846	-0.27661	-0.412749	0.189027	0.484386	0.252488	0.585343
1537	CUST_3113_PI379238085	3498226_2	Contig0670	0.379839	0.464912	-0.449577	-0.889997	-0.425292	-0.859574
1538	CUST_437_PI380538642	zams15_D15_062	zams15_D15_062.ab1	0	0	0	0	0	0
1539	CUST_2778_PI379238085	3499432_2	3499432_2	0.252461	0.205704	-0.2928	0	-0.0456838	0
1540	CUST_224_PI379238085	3501547_2	Contig0928	0.250836	0.249872	-0.217255	0.161505	-0.214684	0.127686
1541	CUST_227_PI380538638	zams05_P18_065	zams05_P18_065.ab1	0	0	-0.112189	0	-0.240311	0.313949
1542	CUST_73_PI380538648	zamn02_B08_032	Contig0027	0	0	0	0	-0.237332	0
1543	CUST_5058_PI379238085	3503017_1	Contig0949	-0.0177253	0.0396538	0.146991	0.115968	0.101077	0.140187
1544	CUST_472_PI380538648	zamn02_P09_033	#N/A	0.0820651	0	0	0	-0.252136	0
1545	CUST_4663_PI379238085	3503495_2	3503495_2	-0.481304	-0.581968	0.624068	1.06179	0.490607	0.906899
1546	CUST_3715_PI379238085	3496485_2	Contig0450	0.266765	0.341525	-0.165879	-0.300562	-0.199862	-0.28838
1547	CUST_272_PI380538648	zamn04_C21_093	zamn04_C21_093.ab1	0	0	0	0	-0.2149	0
1548	CUST_3661_PI379238085	3500486_1	Contig0826	0.381582	0.393485	-0.436336	-0.159157	-0.429522	-0.183811
1549	CUST_86_PI380538640	zams08_P19_066	zams08_P19_066.ab1	0	0	0	0	-0.284692	0
1550	CUST_122_PI379238087	zaFBplate1_K12_038.ab1	zaFBplate1_K12_038.ab1_F	-0.922941	-0.888227	1.01356	1.06494	0.811649	0.757264
1551	CUST_3672_PI379238085	3507189_1	3507189_1	0.169122	0.160845	-0.186643	0	-0.319008	0
1552	CUST_1348_PI379238085	3497803_3	3497803_3	-0.062297	-0.0460244	0.112392	0.20164	0.122467	0.232992
1553	CUST_5208_PI379238085	3496111_2	Contig0382	-0.119117	-0.110645	0.227816	0.537684	0.224082	0.339818
1554	CUST_1282_PI379238085	3502634_2	#N/A	0.729633	0.678261	-0.702865	0	-0.693446	0.299567
1555	CUST_8509_PI379238085	3505290_2	3505290_2	-1.27834	-1.25915	1.22583	0.662559	1.54224	0.774986
1556	CUST_3384_PI379238085	3500349_1	3500349_1	0.693359	0.0855371	-0.662169	0	0	0.134093
1557	CUST_4684_PI379238085	3498820_2	Contig0716	1.11922	1.15809	-1.08954	0	-1.15319	0
1558	CUST_188_PI379238089	zaFBplate1_C14_061.ab1	zaFBplate1_C14_061.ab1_R	-0.292369	0	0.161966	0	0.0188936	0
1559	CUST_4680_PI379238085	3504899_2	3504899_2	-0.997432	-0.926023	0.769492	0.383507	0.935935	0.324304
1560	CUST_8655_PI379238085	3501169_3	3501169_3	0.541137	0.574021	-0.479948	-0.426771	-0.420644	-0.385736
1561	CUST_8164_PI379238085	3498311_7	Contig0678	0.576377	0.565729	-0.634727	-0.0451382	-0.69116	0.164291
1562	CUST_3_PI380567544	DQ827723.1	DQ827723.1	0.333619	0.330971	-0.295681	-0.11774	-0.298107	0.0099526
1563	CUST_2793_PI379238085	3496340_1	3496340_1	0.20722	0.071251	-0.634625	0	-0.29522	0
1564	CUST_5165_PI379238085	3498585_1	3498585_1	-0.033225	-0.00536192	0.109416	0.192989	0.138584	0.207655
1565	CUST_54_PI380538636	zams03_I13_055	zams03_I13_055.ab1	0.27584	0.279184	-0.253117	-0.61974	-0.252609	-0.556309
1566	CUST_362_PI380538638	zams05_D18_077	Contig0249_ext	0.731318	0.812915	-0.827456	-1.10548	-0.795279	-0.98421
1567	CUST_77_PI380538638	zams05_A08_032	#N/A	-1.69573	-1.49347	1.41021	1.21835	1.36848	1.27764
1568	CUST_9203_PI379238085	3496892_2	3496892_2	-0.535911	-0.474833	0.381031	0	0.290448	0.140814
1569	CUST_500_PI380538640	zams08_G15_058	#N/A	0	0	-0.159311	0	0	0
1570	(-)3xSLv1	NegativeControl	NegativeControl	0	0	0	0	0	0
1571	CUST_7247_PI379238085	3499959_3	3499959_3	-0.0147321	0.0196666	-0.0127557	0.0848119	0.0221709	0.240031
1572	CUST_1202_PI379238085	3498544_2	3498544_2	-0.128479	-0.225122	-0.135613	0	0.185711	0
1573	CUST_2244_PI379238085	3497917_1	Contig0638	0.80588	0.829515	-0.882817	-0.508089	-0.773707	-0.352123
1574	CUST_828_PI379238085	3503372_1	3503372_1	-1.06142	-1.42578	1.61963	0.603173	1.24407	0.604956
1575	CUST_7687_PI379238085	3495904_3	3495904_3	1.84061	1.69139	-1.90505	0	-1.7657	0
1576	CUST_8382_PI379238085	3495924_3	3495924_3	0.719244	0.752039	-0.912191	-1.29399	-0.845861	-1.0591
1577	CUST_229_PI380538642	zams14_M20_068	Contig0600	-0.351028	-0.264551	0.438337	0.0415228	0.466863	0.0847538
1578	CUST_167_PI379238087	zaFBplate1_O20_066.ab1	zaFBplate1_O20_066.ab1_F	0	0.181914	0	0	0	0
1579	CUST_477_PI380538642	zams17_O23_082	Contig0121_ext	-0.274192	-0.361247	0.488398	0	0.0305705	0
1580	CUST_405_PI380538646	zams25_I20_072	zams25_I20_072.ab1	0.163335	0.0586693	0.0788611	0	-0.179254	0
1581	CUST_7777_PI379238085	3498847_1	#N/A	0.923214	1.01317	-0.776677	0	-0.725406	0
1582	CUST_250_PI379238087	zaFBplate1_K01_005.ab1	zaFBplate1_K01_005.ab1_F	-0.415404	-0.356811	0.479069	0	0.463611	0
1583	CUST_6478_PI379238085	3508754_1	3508754_1	-0.383014	-0.182247	0.843519	0	0.494511	0
1584	CUST_9105_PI379238085	3501517_1	Contig0315	0.777716	0.829648	-0.691743	-1.07017	-0.632436	-1.08596
1585	CUST_1243_PI379238085	3495861_2	3495861_2	0.472098	0.461665	-0.148468	-0.48198	-0.0840699	-0.473797
1586	CUST_38_PI380567544	DQ827722.1	DQ827722.1	0	0	0	0	0	0
1587	CUST_360_PI380538648	zamn02_E21_091	zamn02_E21_091.ab1	0	0	0	-0.686359	0	0
1588	CUST_47_PI380567544	Ph_Wnt-B,	Ph_Wnt-B,	0	0	0	0	0	0
1589	CUST_67_PI380567544	Ph_Wnt-C,	Ph_Wnt-C,	0.122018	-0.050678	0	0	0.180674	0
1590	CUST_8176_PI379238085	3506563_1	3506563_1	0.107554	0.149409	-0.0268885	-0.251538	-0.000913952	-0.304867
1591	CUST_370_PI380538636	zams01_G17_073	Contig0226	-1.34568	-1.25187	1.22491	0	1.2645	0.241256
1592	CUST_115_PI380538642	zams16_J22_087	Contig0114	0.582265	0.639341	-0.489327	-0.930371	-0.478496	-0.908648
1593	CUST_3541_PI379238085	3509936_1	3509936_1	-0.822637	-0.655629	0.68211	0	0.592961	0
1594	CUST_739_PI379238085	3500347_1	3500347_1	0	-0.0768403	0	0	0	0
1595	CUST_144_PI380538640	zams11_H11_042	Contig0930	0	0	0	0	0	0
1596	CUST_9034_PI379238085	3496432_2	3496432_2	-0.100051	-0.0608501	0.329596	0.0466209	0.331372	-0.0287861
1597	CUST_6192_PI379238085	3501155_4	#N/A	0.556577	0.511006	-0.389264	0.0123295	-0.37756	-0.0753331
1598	CUST_227_PI380538636	zams02_F10_043	#N/A	-0.39272	-0.466759	0.380598	0.470406	0.364811	0.640273
1599	CUST_5_PI380567544	DQ827723.1	DQ827723.1	0.348464	0.282107	-0.306426	-0.0381043	-0.262642	-0.123765
1600	CUST_724_PI379238085	3496720_1	#N/A	0.503405	0.344362	-0.240965	0.124764	-0.226293	0.048787
1601	CUST_763_PI379238085	3498310_1	3498310_1	-0.104964	-0.143231	0.217308	-0.476894	0.300108	-0.52607
1602	CUST_80_PI380538636	zams02_F18_075	zams02_F18_075.ab1	-1.17293	-1.26886	1.14854	1.21243	1.24303	1.20645
1603	CUST_6382_PI379238085	3497454_1	3497454_1	-0.213187	-0.279119	0.376733	0.582028	0.425727	0.484313
1604	CUST_6431_PI379238085	3498480_1	3498480_1	-0.0687814	-0.126798	0.229652	0.410549	0.21651	0.312828
1605	CUST_2409_PI379238085	3502844_2	#N/A	0.569467	-0.113137	0.403451	0	0	0
1606	CUST_48_PI380538640	zams10_K12_038	Contig0223	0	0	0	0	0	0
1607	CUST_189_PI380538640	zams07_H11_042	zams07_H11_042.ab1	0	-0.0290871	0.0900563	0	0.00590668	0
1608	CUST_62_PI380538640	zams08_J24_088	zams08_J24_088.ab1	0	0.223447	0	0	0	0
1609	CUST_1201_PI379238085	3498544_2	3498544_2	-0.111476	-0.251469	0.290885	0	0.200033	0
1610	CUST_1537_PI379238085	3499958_3	Contig0794	0.192299	0	-0.28002	0	0	0
1611	CUST_4477_PI379238085	3496067_1	Contig0374	0.413385	0.309419	-0.434589	0	-0.126829	0.0258144
1612	CUST_9016_PI379238085	3497503_1	3497503_1	0.386707	0.318746	-0.315751	-0.319526	-0.285519	-0.205127
1613	CUST_459_PI380538650	zamn04_H24_090	Contig0626	-0.227461	-0.217885	0.225638	0.191884	0.246346	0.177716
1614	CUST_160_PI380538648	zamn01_J20_072	zamn01_J20_072.ab1	0	0	0	0	0	0
1615	CUST_5511_PI379238085	3503579_1	#N/A	2.40568	2.26839	-2.35406	-1.46181	-2.30333	-1.51039
1616	CUST_105_PI380567544	Ph_GATA,	Ph_GATA,	0.373663	0	0	0	0	0
1617	CUST_97_PI379238089	zaFBplate1_K14_053.ab1	zaFBplate1_K14_053.ab1_R	0.304113	0	-0.485223	0	0	0
1618	CUST_207_PI380538640	zams11_H01_009	Contig0204	-0.573476	-0.684206	0.554049	0.833395	0.613204	0.914446
1619	CUST_5690_PI379238085	3509087_2	3509087_2	-1.20544	-1.17385	1.23252	0.705791	1.17006	0.6254
1620	CUST_150_PI380538638	zams04_B09_047	Contig0151	0.0214523	-0.0100852	0.192877	0.27405	0.181037	0.102139
1621	CUST_5693_PI379238085	3509087_1	3509087_1	0.385702	0	-0.286232	0	-0.0620137	0
1622	CUST_199_PI380538650	zamn04_K06_021	Contig0585	-0.526237	-0.51066	0.621422	0.467994	0.577338	0.412638
1623	CUST_631_PI379238085	3496655_2	3496655_2	0.101197	0.198084	-0.0376008	0	-0.236463	0
1624	CUST_83_PI380538640	zams10_J12_040	#N/A	0	0	0	0	-0.160681	0
1625	CUST_3888_PI379238085	3497293_3	#N/A	-0.0997505	-0.0569117	0.130722	-0.272472	0.0998015	-0.304328
1626	CUST_3442_PI379238085	3495984_1	#N/A	-0.0639655	-0.0654203	0.211032	0.798532	0.138405	0.601735
1627	CUST_183_PI380538640	zams10_M04_004	zams10_M04_004.ab1	-0.318245	-0.227726	0.435043	0	-0.149454	0
1628	CUST_7088_PI379238085	3496169_3	3496169_3	1.11946	0.985757	-1.41951	0	-0.614385	0
1629	CUST_2984_PI379238085	3502632_1	3502632_1	-0.337115	-0.422151	0.124309	0	-0.0103921	0
1630	CUST_1062_PI379238085	3497739_2	Contig0617	0.366094	0.406169	-0.240347	0.106977	-0.245586	0.109108
1631	CUST_3502_PI379238085	3509612_2	3509612_2	0.647433	0.414373	-1.01196	0	-0.339508	0
1632	CUST_1817_PI379238085	3497911_4	#N/A	0.960859	0.358011	-0.480238	0	-0.341775	0
1633	CUST_422_PI380538640	zams11_J09_039	#N/A	0	0.172956	0	0	-0.0373655	0
1634	CUST_5785_PI379238085	3497494_1	3497494_1	-1.09444	-0.982882	0.869577	0	0.970102	0.217558
1635	CUST_4817_PI379238085	3498104_2	Contig0655	1.2202	1.00385	-1.47134	0	-1.21469	0
1636	CUST_55_PI380538650	zamn03_O05_017	zamn03_O05_017.ab1	0	0	0	0	0	0
1637	CUST_196_PI379238085	3498839_3	Contig0717	0.476766	0.468679	-0.320517	-0.18083	-0.289626	-0.087081
1638	(+)E1A_r60_a107	E1A_r60_a107	E1A_r60_a107	-0.356772	-0.405996	0.0110791	-0.179534	0.00175266	-0.153432
1639	CUST_438_PI380538648	zamn04_F10_043	Contig0062_ext	0	0	0	0	0	0
1640	CUST_2032_PI379238085	3500089_1	#N/A	0.468547	0.459406	-0.445381	0	-0.301971	0
1641	CUST_450_PI380538646	zams23_L03_006	zams23_L03_006.ab1	0	0	0	0	0	-0.143289
1642	CUST_8006_PI379238085	3496713_1	3496713_1	0	0	-0.111746	0	0.149187	0
1643	CUST_1573_PI379238085	3509521_1	3509521_1	-0.00439005	0	0	0	0	0
1644	CUST_8380_PI379238085	3506890_1	3506890_1	0	0	0	0	0	0
1645	CUST_1577_PI379238085	3499073_1	Contig0736	1.13242	1.03429	-1.12529	-1.38937	-1.0937	-1.39157
1646	CUST_198_PI379238087	zaFBplate1_B06_031.ab1	Contig0310	-1.15152	-0.366041	1.44164	0.124539	0.405597	0
1647	CUST_3215_PI379238085	3496691_1	#N/A	0.517264	0.476368	-0.719571	0	-0.49478	0
1648	CUST_1539_PI379238085	3498123_4	3498123_4	0.0639796	0.0697801	-0.160636	0	0.150689	0
1649	CUST_201_PI379238087	zaFBplate1_N05_019.ab1	zaFBplate1_N05_019.ab1_F	-1.61434	-1.54592	1.69742	1.42069	1.73456	1.46147
1650	CUST_6495_PI379238085	3496716_2	3496716_2	-0.3046	-0.362662	0.417905	0	0.602057	0
1651	CUST_234_PI380538646	zams25_G09_041	zams25_G09_041.ab1	0	-0.0497708	0	0	0	0
1652	CUST_8215_PI379238085	3504875_1	3504875_1	0.608413	0.12039	-0.534904	0	-0.279325	0
1653	CUST_3474_PI379238085	3497574_2	#N/A	0.728248	0.858739	-0.59853	-0.990109	-0.588303	-0.843523
1654	CUST_5625_PI379238085	3503122_1	3503122_1	0.100069	-0.115036	-0.0441207	0.13003	-0.0497863	0
1655	CUST_3932_PI379238085	3502546_2	3502546_2	0	0	0.151245	0	0.03512	0
1656	CUST_236_PI380538650	zamn03_D24_094	Contig0048_ext	-1.22432	-1.11672	1.02625	0.244644	0.95126	0.262806
1657	CUST_377_PI380538646	zams23_P07_018	zams23_P07_018.ab1	0	0	0	0	0	0
1658	CUST_7344_PI379238085	3497216_2	3497216_2	0.111061	0.0555631	-0.0876741	-0.664628	-0.0475367	-0.674327
1659	CUST_7907_PI379238085	3496402_2	Contig0434_ext	-0.0842761	-0.285682	0.0856023	0	0.383325	0
1660	CUST_3948_PI379238085	3497772_1	3497772_1	0	0.156692	0	0	0	0
1661	CUST_271_PI380538644	zams19_E07_028	Contig0267	0	0.224029	0	0	0	0
1662	CUST_8550_PI379238085	3495974_3	Contig0354	-1.32206	-1.36576	1.42279	1.29079	1.48678	1.27461
1663	CUST_6902_PI379238085	3505319_2	3505319_2	-0.356821	0.0259191	0.288474	0	0.212927	0
1664	CUST_5808_PI379238085	3495905_1	Contig0795	0.166064	0.142738	0.0305332	0	-0.404561	0
1665	CUST_3040_PI379238085	3496734_1	Contig0491	0.0900361	0.157353	0.0382476	0.300978	0.0961317	0.257002
1666	CUST_316_PI379238087	zaFBplate1_A18_079.ab1	zaFBplate1_A18_079.ab1_F	0.0667133	0	0.0443069	0	0.311561	0
1667	CUST_111_PI380567544	DQ827721.1	DQ827721.1	0	0	-0.24869	0	-0.116258	0
1668	CUST_1325_PI379238085	3503171_1	3503171_1	0.467536	0.505348	-0.279488	0	-0.170571	0.160951
1669	CUST_1371_PI379238085	3505117_1	3505117_1	-0.605523	-0.604978	0.736272	0.552523	0.760559	0.50982
1670	CUST_518_PI380538648	zamn01_L07_022	zamn01_L07_022.ab1	0	0	0	0	0	0
1671	CUST_317_PI380538644	zams21_N19_068	Contig0116_ext	-0.440337	-0.484298	0.770299	0	0.661162	0
1672	CUST_9_PI380567544	Ph_Wnt-A,	Ph_Wnt-A,	-0.623838	-0.649189	0.495452	0	0.459936	0
1673	CUST_403_PI380538650	zamn06_E10_043	#N/A	0	0	0	0	0	0
1674	CUST_469_PI380538640	zams11_E20_076	Contig0360	-0.369079	-0.326192	0.545615	0.602314	0.564086	0.535426
1675	CUST_162_PI380538636	zams01_L04_006	#N/A	-1.76784	-1.40241	1.57274	0.683209	1.65917	0.620069
1676	CUST_83_PI380567544	DQ827719.1	DQ827719.1	0	0	0	0	0	0
1677	CUST_292_PI379238087	zaFBplate1_P24_082.ab1	zaFBplate1_P24_082.ab1_F	0.283606	0.145589	-0.207466	-0.27486	-0.211406	-0.242522
1678	CUST_4113_PI379238085	3497630_5	#N/A	-0.0998604	-0.0651648	0.06289	0.132313	0.0471041	-0.00925274
1679	CUST_36_PI380538642	zams16_I16_056	#N/A	-0.208061	0	0	0	0	0
1680	CUST_6239_PI379238085	3495840_1	3495840_1	-0.131468	-0.217056	0.224782	0.525858	0.228223	0.398617
1681	CUST_6657_PI379238085	3509076_1	3509076_1	-0.591511	-0.718972	0.999183	0	0.833952	0
1682	CUST_5455_PI379238085	3503322_1	3503322_1	1.92333	2.18886	-1.86376	-1.67206	-2.14162	-1.77888
1683	CUST_70_PI380538638	zams05_M11_036	#N/A	-0.441659	-0.455191	0.577955	0	0.543704	0
1684	CUST_156_PI380538640	zams10_H14_057	zams10_H14_057.ab1	0	0	0	0	0.225793	0
1685	CUST_548_PI380538646	zams24_P09_033	#N/A	0	0	0	0	0	0
1686	CUST_283_PI379238087	zaFBplate1_D05_029.ab1	zaFBplate1_D05_029.ab1_F	0	0	-0.187596	0	0	0
1687	CUST_7427_PI379238085	3501790_1	3501790_1	0.275103	0	0.154923	0	0.265652	0
1688	CUST_13_PI380567544	DQ917570.1	DQ917570.1	-0.8432	-0.621051	1.01348	0.44293	1.33198	0.502518
1689	CUST_5353_PI379238085	3508888_2	3508888_2	-0.14937	-0.20382	0.170865	0.502871	0.212162	0.0931863
1690	CUST_61_PI380538638	zams05_L16_054	zams05_L16_054.ab1	0.329611	0.185924	-0.21623	0	0.238346	0
1691	(+)E1A_r60_1	E1A_r60_1	E1A_r60_1	0.0703561	0.0880139	0.246412	0.137912	0.291819	0.0858056
1692	CUST_6858_PI379238085	3497320_2	3497320_2	0.000414482	-0.0707336	0.0532291	0.224762	0.0814884	0.118378
1693	CUST_6338_PI379238085	3500714_1	Contig0843_ext	0.146198	0.211648	-0.0880807	-0.161583	-0.0906051	-0.19243
1694	CUST_239_PI380538648	zamn03_D17_077	Contig0008	-1.58466	-1.54383	1.91751	1.75431	1.97451	1.6335
1695	CUST_7634_PI379238085	3499181_4	3499181_4	0.150378	0.142395	-0.160288	0.0436166	-0.125679	-0.0560104
1696	CUST_119_PI380567544	Ph_PL10,	Ph_PL10,	-0.30021	-0.358069	0.549435	0	0.786662	0.124341
1697	CUST_8450_PI379238085	3510694_1	3510694_1	0.180573	0.28999	-0.323533	-0.89019	-0.381166	-0.57827
1698	CUST_5527_PI379238085	3510703_2	3510703_2	-0.694409	-0.576993	0.713911	0	0.647377	0
1699	CUST_391_PI380538642	zams13_P08_018	Contig0112	-0.0215289	0.000954562	-0.20253	-0.298422	-0.159412	-0.376089
1700	CUST_329_PI380538638	zams06_A22_095	zams06_A22_095.ab1	0	0	0	0	0	0
1701	CUST_286_PI379238089	zaFBplate1_B11_048.ab1	zaFBplate1_B11_048.ab1_R	0	0	0.0765205	0	0	0
1702	CUST_120_PI380567544	Ph_PL10,	Ph_PL10,	-0.487153	-0.465906	0.54057	0	0.766386	0.262781
1703	CUST_306_PI380538642	zams13_M17_067	zams13_M17_067.ab1	0	0	0	0	0	0
1704	CUST_118_PI380567544	Ph_PL10,	Ph_PL10,	-0.49193	-0.446753	0.682023	0	0.253696	0.152011
1705	CUST_151_PI380538636	zams02_M14_051	#N/A	0	0	0.0130558	0	-0.185316	0
1706	CUST_175_PI380538646	zams25_B02_015	#N/A	0.412998	0.426444	-0.388094	-0.397466	-0.421147	-0.408386
1707	CUST_1_PI380567544	DQ827723.1	DQ827723.1	0.321022	0.346167	-0.29548	0.0108927	-0.274124	-0.0264848
1708	CUST_15_PI380567544	DQ917570.1	DQ917570.1	-1.22761	-1.27816	1.1667	0.285726	0.298457	0.344877
1709	CUST_290_PI380538642	zams13_F19_076	#N/A	0	0.0406881	0	0	-0.26466	0
1710	CUST_2875_PI379238085	3503015_1	3503015_1	0	-0.0537883	0.426613	0	-0.21814	0
1711	CUST_307_PI380538638	zams05_A01_015	#N/A	0	0	0	0	-0.286307	0
1712	ETG04_27747	ETG04_27747	ETG04_27747	0	0	0	0	-0.392356	0
1713	CUST_204_PI380538638	zams04_O15_050	#N/A	0.0125331	-0.087454	0.188714	0.10252	0.10418	0.318649
1714	CUST_5985_PI379238085	3495977_1	3495977_1	-0.883615	-0.882377	0.836752	0.635338	0.780793	0.660889
1715	CUST_219_PI380538636	zams02_O24_082	#N/A	0	0.273642	0	0	-0.15871	0
1716	CUST_8017_PI379238085	3496206_2	Contig0084	-0.332713	-0.346882	0.36282	0.265135	0.376943	0.292908
1717	CUST_6421_PI379238085	3500162_2	3500162_2	1.30546	1.39642	-1.18052	0	-1.08687	0
1718	CUST_26_PI380567544	DQ917572.1	DQ917572.1	0.25299	0.0824202	0.0450231	0	0.0157597	0
1719	CUST_12_PI380567544	DQ917570.1	DQ917570.1	-1.38661	-1.22032	1.10208	0.491369	1.53921	0.558877
1720	CUST_310_PI379238089	zaFBplate1_B21_095.ab1	zaFBplate1_B21_095.ab1_R	-1.09884	-1.01059	1.00729	0	0.955429	0
1721	CUST_56_PI380567544	Ph_Wnt-Z,	Ph_Wnt-Z,	0	0	0	0	0	0
1722	CUST_6555_PI379238085	3509628_1	3509628_1	-1.84846	-1.67333	1.80251	0.641958	1.4202	0.663939
1723	CUST_2858_PI379238085	3497215_2	#N/A	0.768729	0.790495	-0.449684	-0.14056	-0.456967	-0.159413
1724	CUST_1850_PI379238085	3510584_2	3510584_2	-0.00282655	0.00810749	0.162938	0.0539879	0.173832	0.0401223
1725	CUST_2999_PI379238085	3496249_1	Contig0411	0	0	-0.197511	0	-0.0140948	0
1726	CUST_9162_PI379238085	3504910_1	3504910_1	1.13738	1.01426	-1.23283	-0.529438	-1.11659	-0.167723
1727	CUST_1095_PI379238085	3506508_2	3506508_2	-0.0092074	-0.0461842	0.148596	0	-0.152856	0
1728	CUST_6337_PI379238085	3500714_1	Contig0843	0.13566	0.158058	-0.00623854	0.0489886	0.0327047	0.0602025
1729	CUST_71_PI380538640	zams09_J04_008	Contig0169	-1.30435	-1.00088	1.48487	0.706102	1.36429	0.766014
1730	CUST_304_PI380538636	zams02_B17_079	Contig0120	-0.114144	-0.0960734	0.116594	-0.143511	0.102992	-0.106736
1731	CUST_321_PI379238085	3500798_1	3500798_1	0	0	0	0	0.133357	0
1732	CUST_376_PI380538642	zams16_A08_032	Contig0965	-0.358657	-0.277729	0.672452	0.373582	0.61086	0.401116
1733	CUST_6070_PI379238085	3499135_1	3499135_1	0.457342	0.54947	-0.495404	-0.836202	-0.56425	-0.756661
1734	CUST_450_PI380538648	zamn04_C11_046	Contig0402_ext	0.26136	0.3284	-0.161724	-0.416945	-0.11397	-0.333672
1735	CUST_3058_PI379238085	3496303_1	Contig0419	-0.0467289	0.0013266	0.0847785	0.295992	0.134674	0.400427
1736	(+)eQC-41	EQC	EQC	0	0	0	0	0	0
1737	CUST_18_PI380567544	Ph_Wnt-Y,	Ph_Wnt-Y,	0	0	0	0	0	0
1738	CUST_5855_PI379238085	3498952_3	Contig0728	-0.814393	-0.740586	0.744272	1.03498	0.78908	0.983697
1739	CUST_534_PI380538644	zams18_H01_009	#N/A	0	0	0	0	0	0
1740	CUST_485_PI380538642	zams17_F03_012	Contig0155	0	0	0	0	0	0
1741	CUST_752_PI379238085	3496213_3	3496213_3	-0.522863	-0.247226	0.615985	0	0.567551	0
1742	CUST_7179_PI379238085	3496049_2	Contig0373	0.307053	0.438359	-0.273849	-0.176753	-0.223725	-0.189535
1743	CUST_509_PI379238085	3496366_1	Contig0429	-0.202909	-0.176132	0.230048	-0.457363	0.289252	-0.406738
1744	CUST_308_PI379238085	3503966_1	#N/A	-0.266906	-0.312874	0.270161	0	0	0
1745	CUST_54_PI380567544	Ph_Wnt-Gr1,	Ph_Wnt-Gr1,	-0.296713	-0.320972	0	0	0.276867	0
1746	CUST_4750_PI379238085	3497509_2	Contig0596	-0.0667297	0.13297	0.316098	0	0.201043	0
1747	CUST_1375_PI379238085	3501892_1	Contig1029_ext	0.947867	0.78204	-0.467031	0	-0.310941	0
1748	CUST_2988_PI379238085	3505217_1	Contig0412	-0.369731	-0.400487	0.475168	0.64457	0.535069	0.48715
1749	CUST_7071_PI379238085	3501467_2	Contig0919	0.0807888	0.111402	0.0345156	0.371543	0.0920311	0.339984
1750	CUST_2435_PI379238085	3499175_1	3499175_1	-1.01464	-1.24743	1.51004	0.304533	1.38186	0.349495
1751	CUST_130_PI380538648	zamn02_B11_048	Contig0028_ext	0	0	0	0	0	0
1752	CUST_7274_PI379238085	3497053_3	3497053_3	0.582508	0.483463	-0.583324	-1.08473	-0.510897	-1.00782
1753	CUST_8888_PI379238085	3496234_4	3496234_4	0.277924	0.199457	-0.247868	-0.427451	-0.230115	-0.465689
1754	CUST_2818_PI379238085	3499689_1	3499689_1	1.33166	1.35097	-1.07268	0	-0.921354	0
1755	CUST_2931_PI379238085	3499946_1	3499946_1	0	0	0	0	0	0
1756	CUST_4712_PI379238085	3498237_1	Contig0674	0.980688	1.02696	-0.841266	0.556163	-0.777988	0.618134
1757	CUST_2508_PI379238085	3501376_2	#N/A	1.33792	0.916918	-0.948121	0	-0.731248	0
1758	CUST_4266_PI379238085	3509187_2	3509187_2	-0.568778	-0.810016	1.06522	0	0.865925	0
1759	CUST_89_PI379238087	zaFBplate1_F03_012.ab1	#N/A	-0.417706	-0.280965	0.329825	0.645046	0.31766	0.612402
1760	CUST_230_PI380538646	zams22_M24_084	#N/A	0	-0.0549035	0.266066	0	0	0
1761	CUST_8126_PI379238085	3496236_2	#N/A	-0.164059	-0.245995	0.199947	0.580104	0.229342	0.268623
1762	CUST_175_PI380538636	zams02_I07_024	zams02_I07_024.ab1	-0.820975	-0.861374	0.639803	0.737022	0.701178	0.795732
1763	CUST_12_PI380538636	zams02_J02_007	#N/A	-0.03997	0	-0.0336662	0	0	0
1764	CUST_149_PI379238089	zaFBplate1_N17_067.ab1	zaFBplate1_N17_067.ab1_R	-0.976575	-0.911704	0.972101	0	0.837888	0
1765	CUST_2039_PI379238085	3498052_2	3498052_2	-0.108665	0	0	0	0	0
1766	CUST_92_PI380567544	Ph_armadillo,	Ph_armadillo,	-0.83275	-0.997063	0.980344	0	1.04275	0.187806
1767	CUST_1400_PI379238085	3504962_1	3504962_1	-0.570317	-0.855382	0.322651	0	0.539923	0.132054
1768	CUST_8968_PI379238085	3508007_2	3508007_2	0.0665457	0	-0.271882	0	0	0
1769	CUST_2463_PI379238085	3501342_2	3501342_2	0.283811	0.246074	-0.0722636	-0.251612	-0.0466602	-0.296607
1770	CUST_1584_PI379238085	3498456_1	3498456_1	0	0	0.262075	0	0.0813856	0.0347931
1771	CUST_5121_PI379238085	3496555_3	Contig0462_ext	1.068	1.10724	-1.26571	0	-0.962697	0
1772	CUST_6204_PI379238085	3509769_2	Contig0974	0	0.0957222	0	0	0	0
1773	CUST_5807_PI379238085	3495905_1	Contig0795	0.29574	0.128241	-0.431527	0	-0.141184	0
1774	CUST_3325_PI379238085	3496744_1	3496744_1	-0.230911	-0.243055	0.310109	0.362511	0.304021	0.207547
1775	CUST_228_PI380538644	zams21_G22_089	Contig0410	-0.318952	-0.313418	0.313612	0.226934	0.354589	0.150829
1776	CUST_5250_PI379238085	3499029_3	Contig0734	0.748747	0.772972	-0.72238	0.425619	-0.68826	0.314636
1777	(+)E1A_r60_3	E1A_r60_3	E1A_r60_3	0.517098	0.489978	0.529716	0.659173	0.632786	0.427686
1778	CUST_441_PI379238085	3500323_2	Contig0064	-0.761919	-0.711561	0.830987	0.477589	0.885307	0.428939
1779	CUST_7393_PI379238085	3501381_1	Contig0906	0.0286474	0.0520912	0.141095	-0.128602	0.186453	-0.12666
1780	CUST_5968_PI379238085	3497310_1	3497310_1	0.540955	0	-0.285284	0	0	0
1781	CUST_260_PI380538636	zams02_P05_017	#N/A	0	0	0.0717937	0	0	0
1782	CUST_196_PI380538648	zamn05_G24_090	#N/A	0	0	0	0	0	0
1783	CUST_1997_PI379238085	3499554_1	3499554_1	-1.03331	-1.02326	1.07244	0.71835	1.10817	0.715798
1784	CUST_9305_PI379238085	3497843_1	3497843_1	1.16228	1.18562	-1.06241	0	-1.06571	0.197727
1785	CUST_3750_PI379238085	3509980_1	3509980_1	0.902127	0.782042	-0.86723	0	-0.75119	0
1786	CUST_1309_PI379238085	3501581_2	3501581_2	1.24211	0.994072	-0.837275	0	-0.545335	-0.229371
1787	CUST_6880_PI379238085	3500383_1	Contig0819	1.32286	1.30561	-1.19725	-1.75887	-1.19065	-1.47539
1788	CUST_4374_PI379238085	3500905_2	Contig0853	0.0862136	0	-0.253903	0	-0.3255	0
1789	CUST_6664_PI379238085	3496982_4	3496982_4	-0.273903	-0.256559	0.438049	0.386523	0.37529	0.383345
1790	CUST_323_PI380538640	zams10_J18_071	zams10_J18_071.ab1	-0.106248	0.213675	0.406305	0	-0.170041	0
1791	CUST_444_PI380538642	zams17_H14_057	Contig0197	-0.327073	-0.258846	0.268749	0.395397	0.22645	0.429681
1792	CUST_6344_PI379238085	3503276_2	3503276_2	-0.820592	-0.673985	0.0292297	0	-0.0551352	0
1793	CUST_397_PI380538638	zams05_L20_070	zams05_L20_070.ab1	0	0	0	0	-0.304778	0
1794	CUST_4823_PI379238085	3498081_2	Contig0653_ext	0.277463	0.240644	-0.282604	0.17219	-0.266966	-0.00366402
1795	CUST_4178_PI379238085	3501556_6	3501556_6	0.460916	0.534887	-0.359437	-0.121667	-0.340449	-0.129722
1796	CUST_3236_PI379238085	3495998_2	3495998_2	1.22606	0.944589	-0.954786	0	-0.551365	0
1797	CUST_55_PI379238085	3496802_2	Contig0508	1.50988	1.75995	-1.44379	0	-1.10482	0
1798	CUST_319_PI379238085	3499756_1	3499756_1	0.809173	0.361815	-0.565115	0	-0.322423	0
1799	CUST_3594_PI379238085	3496881_1	3496881_1	-0.19902	0.18239	0	0	0.0908335	0
1800	CUST_2068_PI379238085	3505332_2	3505332_2	0	0	0	0	0	0
1801	CUST_381_PI380538638	zams05_O21_081	zams05_O21_081.ab1	0	0	0	0	0	0
1802	CUST_5457_PI379238085	3496882_1	3496882_1	0.114858	0.136328	-0.328371	-0.0945603	-0.404931	0.135355
1803	CUST_186_PI380538644	zams21_L05_021	zams21_L05_021.ab1	0	0	0	0	-0.0191567	0
1804	CUST_337_PI380538636	zams02_I17_071	zams02_I17_071.ab1	0	0	0	0	-0.0575697	0
1805	CUST_8830_PI379238085	3505224_2	3505224_2	0.0272204	0.134078	-0.189501	0	0.0598062	0.0173826
1806	CUST_5514_PI379238085	3497500_2	Contig0595	0.294131	0.315974	-0.160214	0.110846	-0.158434	0.0872476
1807	CUST_1229_PI379238085	3509511_2	3509511_2	0	0	-0.580889	0	-0.495292	0
1808	CUST_309_PI379238089	zaFBplate1_B18_079.ab1	zaFBplate1_B18_079.ab1_R	-0.00847324	0	0	0	0	0
1809	CUST_145_PI379238085	3497147_1	3497147_1	0.279311	0.248229	-0.250869	-0.613548	-0.233937	-0.499402
1810	CUST_3404_PI379238085	3504112_1	#N/A	0.104838	0.117997	-0.0968619	0.0447051	-0.112783	0.122438
1811	CUST_383_PI380538642	zams13_K09_037	zams13_K09_037.ab1	0	0	0	0	0	0
1812	CUST_1448_PI379238085	3498988_1	3498988_1	0.977441	0.98803	-0.779378	-0.809298	-0.815806	-0.697503
1813	CUST_3853_PI379238085	3498795_4	3498795_4	0.0522783	-0.143311	0.0765541	0	0.206892	0
1814	CUST_28_PI380567544	DQ917572.1	DQ917572.1	-0.144961	-0.163409	0.34499	0.417427	0.330246	0.42232
1815	CUST_3141_PI379238085	3510147_1	3510147_1	0	0	0	0	0	0
1816	CUST_281_PI380538638	zams05_M23_084	zams05_M23_084.ab1	0.392396	0.111948	-0.304246	0	0.0114961	0
1817	CUST_540_PI380538646	zams23_O17_065	zams23_O17_065.ab1	0.275478	0.22815	-0.227246	0	-0.185283	0
1818	CUST_35_PI380567544	Ph_Wnt-Gr3,	Ph_Wnt-Gr3,	-0.435437	-0.28489	0.309028	0	0.00809717	0
1819	CUST_1575_PI379238085	3496435_1	#N/A	-0.288792	-0.201648	0.299121	-0.151301	0.332555	-0.18565
1820	CUST_81_PI379238085	3497752_1	Contig0619	0.625127	0.576189	-0.700953	-0.202359	-0.527247	-0.27151
1821	CUST_8902_PI379238085	3504131_2	3504131_2	-0.0514306	-0.23426	0.330972	0	0.422088	0
1822	CUST_5088_PI379238085	3501382_3	Contig0907	-0.330127	-0.289773	0.505454	0.422613	0.57112	0.576943
1823	CUST_421_PI380538650	zamn01_P12_034	#N/A	0	0	0	0	-0.100567	0
1824	CUST_2210_PI379238085	3497130_1	3497130_1	0.413699	0.498033	-0.404435	-0.546978	-0.366211	-0.575328
1825	CUST_6719_PI379238085	3497031_2	3497031_2	0.344803	0.453747	-0.283192	-0.117851	-0.226046	-0.164203
1826	CUST_273_PI379238087	zaFBplate1_A14_063.ab1	Contig0308	1.4317	1.30211	-1.05355	-1.11939	-0.877069	-1.17434
1827	CUST_451_PI379238085	3497459_1	Contig0586	-0.441484	-0.334509	0.420328	1.079	0.441007	1.01566
1828	CUST_5814_PI379238085	3495882_3	3495882_3	2.62986	2.25592	-2.62756	0	-2.58581	0
1829	CUST_6779_PI379238085	3499870_2	3499870_2	0	0	0	0	0	0
1830	CUST_299_PI380538648	zamn01_G11_042	zamn01_G11_042.ab1	0	0	0.0427297	0	0.0419143	0
1831	CUST_44_PI380538650	zamn03_N23_084	#N/A	-0.592535	-0.686043	0.508974	0.250296	0.663217	0.410064
1832	CUST_402_PI380538644	zams22_B01_015	zams22_B01_015.ab1	0	0	0	0	0	0
1833	CUST_6730_PI379238085	3496391_2	3496391_2	0.41653	0.416247	-0.501318	-0.624949	-0.360008	-0.589136
1834	CUST_5791_PI379238085	3499538_1	3499538_1	-1.17777	-1.1632	0.915743	0	1.07358	0.052729
1835	CUST_95_PI380567544	Ph_armadillo,	Ph_armadillo,	-0.861359	-1.18289	1.02771	0	1.16953	0.446129
1836	CUST_90_PI380538642	zams13_D13_061	Contig0279	0	0	0	0	0	0
1837	CUST_185_PI380538648	zamn03_H15_058	zamn03_H15_058.ab1	0	0	0	0	0	0
1838	CUST_1347_PI379238085	3497803_3	3497803_3	0.0905075	0.146464	0.0722854	0.0801456	0.107634	-0.0077786
1839	CUST_1864_PI379238085	3500036_2	Contig0797	-0.997351	-0.941804	1.29701	1.07182	1.34105	0.944043
1840	CUST_316_PI380538646	zams23_F20_076	Contig0284	-0.52344	-0.535889	0.564546	0.39229	0.556287	0.206824
1841	CUST_4586_PI379238085	3499859_1	3499859_1	0.118454	0.0825593	-0.0495044	0.16046	-0.0453652	0.096519
1842	CUST_52_PI380567544	Ph_Wnt-Gr1,	Ph_Wnt-Gr1,	-0.263909	0.161211	0.369917	0	0.32185	0
1843	CUST_353_PI380538648	zamn01_N07_020	Contig0021	0	0	0	0	0	0
1844	CUST_8924_PI379238085	3509653_2	3509653_2	-0.310767	-0.354172	0.348221	0	0.38301	0
1845	CUST_3486_PI379238085	3501277_2	3501277_2	1.49509	1.45965	-1.05795	-1.65307	-1.01457	-1.57707
1846	CUST_1151_PI379238085	3496038_3	Contig0371	1.85302	1.85922	-1.47947	0	-1.44342	0
1847	CUST_1652_PI379238085	3508276_1	3508276_1	0.157535	0	0	0	0	0
1848	CUST_3891_PI379238085	3501072_1	3501072_1	0	0	0	0	0	-0.170797
1849	CUST_2480_PI379238085	3503287_1	3503287_1	-0.145687	-0.295656	0.211701	0	0.348752	-0.176469
1850	CUST_5945_PI379238085	3495999_1	3495999_1	-0.596817	-0.748084	0.694473	0.542632	0.725327	0.295684
1851	CUST_4781_PI379238085	3495950_5	3495950_5	0.0332379	-0.33121	0.0280945	0	0.193669	-0.236637
1852	CUST_5701_PI379238085	3496993_4	Contig0533	0.535	0.531203	-0.402865	-0.147764	-0.376201	-0.233971
1853	CUST_5096_PI379238085	3506140_2	3506140_2	1.9155	1.51549	-1.74517	0	-1.88296	-0.367668
1854	CUST_2431_PI379238085	3500316_1	Contig0813	-0.595858	-0.56587	0.794054	0.374183	0.820709	0.25736
1855	CUST_21_PI380567544	DQ827720.1	DQ827720.1	0	0	0	0	0	0
1856	CUST_951_PI379238085	3498121_3	3498121_3	0.497296	0.474149	-0.472823	-0.102549	-0.283688	-0.463396
1857	CUST_1714_PI379238085	3497448_1	3497448_1	0.465849	0.424272	-0.67305	-0.502742	-0.574586	-0.441874
1858	CUST_352_PI379238085	3496233_1	Contig0406	0.172137	0.124673	-0.0760206	0.111494	-0.0732074	0.0572907
1859	CUST_575_PI380538646	zams23_C05_029	zams23_C05_029.ab1	0	0	0	0	0	0
1860	CUST_357_PI380538642	zams17_A19_080	Contig0237	0.731507	0.762024	-0.485215	-0.446547	-0.481574	-0.398758
1861	CUST_120_PI380567544	Ph_PL10,	Ph_PL10,	-0.411884	-0.582256	0.554493	0	0.711896	0.0441732
1862	CUST_6403_PI379238085	3497023_2	Contig0538	-0.367599	-0.358954	0.338633	0.321361	0.358333	0.287032
1863	CUST_4286_PI379238085	3505478_1	3505478_1	-0.428364	-0.380435	0.433572	0.315986	0.457165	0.269683
1864	CUST_17_PI379238087	zaFBplate1_I18_071.ab1	zaFBplate1_I18_071.ab1_F	-1.23312	-1.08784	1.17139	0	1.03308	0
1865	CUST_329_PI380538636	zams02_O12_034	zams02_O12_034.ab1	0	0	0.214305	0	0	0
1866	CUST_334_PI380538640	zams07_A11_048	Contig0249	0.68641	0.701015	-0.573367	-0.803213	-0.574889	-0.783819
1867	CUST_46_PI380538646	zams23_A04_016	zams23_A04_016.ab1	0	0	0	0	0	0
1868	CUST_9237_PI379238085	3495920_1	Contig0344	-0.0191979	0.0467442	0.0399112	0.514163	0.102107	0.48126
1869	CUST_7588_PI379238085	3508527_2	3508527_2	0.907252	0.710343	-1.18639	0	-0.414191	0
1870	CUST_1132_PI379238085	3496469_3	Contig0448	-0.00562556	-0.0100146	-0.0976466	0.141189	-0.141907	0
1871	CUST_104_PI380538648	zamn01_O10_033	zamn01_O10_033.ab1	0	0	0	0	-0.16287	0
1872	RC11	RC11	RC11	0	0	0	0	-0.254963	0
1873	CUST_203_PI380538650	zamn07_E20_076	zamn07_E20_076.ab1	0	0.432523	0	0	-0.178959	0
1874	CUST_8289_PI379238085	3496018_2	3496018_2	-0.355708	0.198574	0.440023	0	-0.155124	0
1875	CUST_5373_PI379238085	3498161_1	3498161_1	1.7168	1.5939	-1.63923	-1.42792	-1.18329	-1.35931
1876	CUST_6578_PI379238085	3496164_1	3496164_1	0	0	0	0	-0.274207	0
1877	CUST_420_PI380538646	zams23_G10_041	zams23_G10_041.ab1	0	0	0.0098088	0	-0.271261	0
1878	CUST_105_PI379238089	zaFBplate1_G14_057.ab1	Contig0666	0.684237	0.695371	-0.525906	-0.855647	-0.485159	-0.804989
1879	CUST_8942_PI379238085	3497601_2	3497601_2	-0.0292934	-0.0992542	0.0664455	-0.0197833	0.025701	0.122426
1880	CUST_3680_PI379238085	3510119_2	3510119_2	0	0	0	0	-0.0783359	0
1881	CUST_4235_PI379238085	3503555_1	3503555_1	0	0	0	0	-0.13662	0
1882	CUST_2325_PI379238085	3504145_2	3504145_2	0	0	0.0464729	0	-0.172434	0
1883	CUST_878_PI379238085	3507035_1	Contig0944	0.721543	0.501327	-0.486031	0	-0.144137	0
1884	CUST_560_PI380538646	zams23_G05_025	zams23_G05_025.ab1	0	0	0	0	0	0
1885	CUST_1949_PI379238085	3500770_1	Contig0845	0.29998	0.302908	-0.285632	-0.332927	-0.280715	-0.284323
1886	CUST_4815_PI379238085	3498104_3	Contig0655	1.2265	1.14454	-1.04444	0	-1.01138	0
1887	CUST_4622_PI379238085	3501572_1	#N/A	1.36211	1.3108	-1.35862	-1.65772	-1.29532	-1.24184
1888	CUST_290_PI380538644	zams20_G20_074	#N/A	-0.0597449	-0.125205	0.0785509	-0.0283168	0.0775126	-0.0394737
1889	CUST_5591_PI379238085	3502527_1	3502527_1	0.492284	0.502394	-0.532525	-0.965273	-0.523484	-0.672965
1890	CUST_7994_PI379238085	3499782_1	3499782_1	-0.662613	-0.717294	0.594679	1.10741	0.60385	1.12608
1891	CUST_700_PI379238085	3497639_2	3497639_2	-0.00139043	0.0543603	-0.329679	0	-0.196941	0
1892	CUST_8978_PI379238085	3497018_1	3497018_1	0.928504	0.907782	-0.986369	-1.11005	-0.899167	-1.04272
1893	CUST_577_PI380538646	zams24_K20_070	zams24_K20_070.ab1	-0.0679508	0	0.277786	0	0	0
1894	CUST_300_PI379238089	zaFBplate1_N21_083.ab1	Contig0590	-0.139047	-0.0442648	0	0	0.147157	0
1895	CUST_5926_PI379238085	3503250_2	3503250_2	0.545827	0.793602	-0.82762	0	-0.727453	0
1896	CUST_221_PI380538640	zams11_K02_005	#N/A	-0.220311	-0.0811555	0.42213	0.479533	0.373557	0.566406
1897	CUST_2045_PI379238085	3501191_2	Contig0875	0.115698	0.0956945	-0.0678601	0.172701	-0.0555648	0.236123
1898	CUST_83_PI380567544	DQ827719.1	DQ827719.1	0	0	0	0	0	0
1899	CUST_3469_PI379238085	3508487_2	Contig0935	1.44015	1.26573	-1.54731	-0.298521	-1.45097	-0.232275
1900	CUST_490_PI379238085	3500652_2	#N/A	-0.277763	-0.649665	0.436039	0	0.166034	0
1901	CUST_216_PI380538640	zams08_L05_021	Contig0270_ext	-1.30643	-1.15435	0.99414	0.570411	0.475954	0.523137
1902	CUST_5_PI380538640	zams11_G17_073	Contig0433	0	0	0	0	0	0
1903	CUST_4963_PI379238085	3506260_1	3506260_1	-0.458784	-0.435565	0.268954	0	0.368577	0
1904	CUST_4820_PI379238085	3503695_1	#N/A	0.418767	0.453152	-0.542121	-0.192477	-0.526159	-0.147127
1905	CUST_8750_PI379238085	3499090_1	Contig0078	-0.633242	-0.619358	0.508159	0.588693	0.529024	0.557686
1906	CUST_107_PI380538650	zamn04_D09_045	zamn04_D09_045.ab1	0	0.0471684	0	0	0	0
1907	CUST_298_PI380538642	zams13_P19_066	Contig0106	-0.997255	-0.994423	1.02054	1.10986	1.07452	0.938647
1908	CUST_118_PI380538648	zamn04_A14_063	zamn04_A14_063.ab1	0	0	0	0	0	0
1909	CUST_3991_PI379238085	3505109_1	3505109_1	-0.361562	-0.290568	0.299897	0.258863	0.328179	0.135636
1910	CUST_3705_PI379238085	3506702_1	Contig0998	1.80336	1.46466	-1.897	0	-1.51441	0
1911	CUST_6334_PI379238085	3500714_3	Contig0843	0.470367	0.522752	-0.30073	-0.153084	-0.253956	-0.225938
1912	CUST_231_PI379238087	zaFBplate1_I08_024.ab1	zaFBplate1_I08_024.ab1_F	0.331753	0.291549	-0.432087	-0.577362	-0.281258	-0.377433
1913	CUST_2804_PI379238085	3505996_1	3505996_1	-0.00962422	-0.0893842	0.036824	0	0.180512	0
1914	CUST_4583_PI379238085	3498100_1	3498100_1	1.65301	1.70887	-1.57385	0	-1.50939	0
1915	CUST_3321_PI379238085	3497361_1	Contig0580	1.0421	1.11347	-0.86337	-1.22454	-0.850401	-1.24431
1916	CUST_2420_PI379238085	3497154_1	3497154_1	-0.262586	-0.238837	0.325761	-0.136357	0.388239	-0.173588
1917	CUST_4_PI379238087	zaFBplate1_N14_051.ab1	zaFBplate1_N14_051.ab1_F	-1.90851	-1.94381	1.96571	1.56033	2.13759	1.45984
1918	CUST_507_PI380538646	zams23_E23_092	zams23_E23_092.ab1	0.457031	0.495707	-0.356155	0.0570564	-0.322912	0.041805
1919	CUST_7041_PI379238085	3505252_1	3505252_1	-0.536666	-0.596871	0.663265	0	0.819104	0
1920	CUST_3828_PI379238085	3497769_1	#N/A	0.0774456	-0.302273	-0.00915165	0	0.295534	0
1921	CUST_3134_PI379238085	3500083_1	3500083_1	-0.152943	-0.14357	-0.0448941	0	0.185733	0
1922	CUST_1534_PI379238085	3499958_4	Contig0795	0	0	0	0	0	0
1923	CUST_619_PI379238085	3509741_2	3509741_2	-0.64084	-0.558507	0.741481	0.604456	0.715094	0.652195
1924	CUST_9045_PI379238085	3508825_2	3508825_2	0	-0.00716471	0	0	0	0
1925	CUST_9293_PI379238085	3510637_1	3510637_1	-0.573471	-0.609248	0.765674	0	0.667244	0
1926	CUST_7253_PI379238085	3498124_2	Contig0656	0.675735	0.687265	-0.788029	0	-0.459913	-0.0217387
1927	CUST_45_PI380567544	Ph_tinman,	Ph_tinman,	0	0	0	0	0	0.0533695
1928	CUST_165_PI380538646	zams25_E14_059	zams25_E14_059.ab1	0.420818	0.0679158	0.0935784	0	0	-0.263341
1929	CUST_1788_PI379238085	3505323_2	Contig0976_ext	0	0	0.10083	0	0	0.17814
1930	CUST_5212_PI379238085	3501218_5	Contig0881	0.227933	0.234898	-0.170967	0.0162178	-0.11677	-0.0688277
1931	CUST_6561_PI379238085	3498639_2	3498639_2	1.50782	1.39702	-1.46092	-1.15004	-1.41553	-0.959643
1932	CUST_154_PI380538638	zams06_J10_039	Contig0842	0.456207	0.452653	-0.374713	-0.369873	-0.337354	-0.431923
1933	CUST_2465_PI379238085	3497487_4	3497487_4	-0.21395	-0.309915	0.192886	0.551222	0.2974	0.271717
1934	CUST_3294_PI379238085	3496109_1	#N/A	-0.166496	0	0.12936	0	0	0
1935	CUST_69_PI380567544	Ph_Wnt-C,	Ph_Wnt-C,	-0.0617024	0	0	0	0	0
1936	CUST_8379_PI379238085	3506890_1	3506890_1	-0.132397	-0.378089	0.361439	0	0	0
1937	CUST_102_PI380567544	Ph_GATA,	Ph_GATA,	0	0	0	0	0	0
1938	CUST_541_PI380538646	zams25_P11_034	#N/A	0.308981	0.294264	-0.266947	-0.225749	-0.211382	-0.336552
1939	CUST_167_PI380538648	zamn01_F07_028	Contig0523	-0.410316	-0.374617	0.596354	0.900244	0.611786	0.877484
1940	CUST_2518_PI379238085	3497166_1	Contig0558	-0.301223	-0.256448	0.297691	0.277938	0.336344	0.196753
1941	CUST_574_PI379238085	3497370_1	3497370_1	0.82436	0.747139	-0.613809	0	-0.615867	-0.240146
1942	CUST_653_PI379238085	3507731_2	3507731_2	0.578075	0.615908	-0.456774	0.450214	-0.428529	0.154172
1943	CUST_3254_PI379238085	3502060_1	3502060_1	0	0	0.10986	0	0	0
1944	CUST_8783_PI379238085	3498905_2	#N/A	0.164893	0.221436	-0.107948	0.711907	-0.0672061	0.67134
1945	CUST_332_PI380538648	zamn02_K12_038	#N/A	-0.425953	-0.606258	0.631944	0.290636	0.774409	0.22786
1946	CUST_750_PI379238085	3498589_1	3498589_1	0.524252	0.555893	-0.700918	0	-0.702831	0
1947	CUST_12_PI380567544	DQ917570.1	DQ917570.1	-1.11084	-1.55087	1.36375	0.509723	1.5299	0.467541
1948	CUST_2979_PI379238085	3499470_1	Contig0769	0.467559	0.581963	-0.472623	-0.685767	-0.49115	-0.708331
1949	CUST_1512_PI379238085	3497074_2	3497074_2	0.0728948	-0.032512	-0.0475596	0	0.132887	0
1950	CUST_492_PI380538650	zamn07_J17_071	zamn07_J17_071.ab1	-0.481926	-0.397873	0.210799	0	0	0
1951	CUST_6802_PI379238085	3496725_2	Contig0487	0.629283	0.610348	-0.580434	-0.129256	-0.536619	-0.133102
1952	CUST_8987_PI379238085	3507012_1	3507012_1	-0.0727751	-0.110935	0.113571	0.377533	0.0775876	0.488877
1953	CUST_9339_PI379238085	3506690_1	3506690_1	0.0514018	0.0507576	-0.0797525	-0.0741046	-0.0903963	-0.118929
1954	CUST_158_PI380538640	zams09_I19_072	Contig0360	-0.401368	-0.325949	0.53686	0.624663	0.47175	0.648114
1955	CUST_4393_PI379238085	3497236_1	Contig0026	0.317811	0.355648	-0.198618	-0.231012	-0.265752	-0.198702
1956	CUST_2236_PI379238085	3495873_1	Contig0334	0.0888741	0.0842697	0.0658769	-0.221908	0.0523186	-0.164026
1957	CUST_4462_PI379238085	3495957_3	3495957_3	1.16348	1.16112	-1.2988	0	-1.0287	0
1958	CUST_12_PI379238087	zaFBplate1_N10_035.ab1	Contig0314	0	0	0	0	-0.156415	0
1959	CUST_60_PI380538650	zamn02_M06_019	Contig0971	0	0	0	0	-0.253758	0
1960	CUST_8383_PI379238085	3495924_2	Contig0346	0.956142	0.986732	-0.973985	-0.514863	-0.684788	-0.317004
1961	CUST_6266_PI379238085	3501133_2	3501133_2	0.0979056	0.124163	0.0156503	-0.100277	0.0209517	-0.0505669
1962	CUST_441_PI380538648	zamn05_H15_058	Contig0084_ext	-0.205241	-0.234397	0.352999	0.346221	0.332869	0.400144
1963	CUST_8546_PI379238085	3495974_4	Contig0354	-1.69857	-1.61806	1.72691	1.54916	1.57969	1.55932
1964	CUST_7032_PI379238085	3500494_2	Contig0827	-0.798583	-0.911841	0.947574	0.173485	0.607476	0.239988
1965	CUST_491_PI380538644	zams21_K07_022	Contig0116_ext	0.18227	0.317069	-0.562021	0	-0.65496	0
1966	CUST_66_PI380567544	Ph_Wnt-C,	Ph_Wnt-C,	-0.491484	-0.102	0.0837816	0	0.239348	0
1967	CUST_4863_PI379238085	3498490_3	Contig0692	0.528214	0.553209	-0.376764	-0.259531	-0.39756	-0.217151
1968	CUST_270_PI379238089	zaFBplate1_K20_070.ab1	zaFBplate1_K20_070.ab1_R	-1.86931	-1.63322	1.84749	0.698334	1.41587	0.650233
1969	CUST_5360_PI379238085	3496140_5	#N/A	0.534358	0.592266	-0.305016	0.370945	-0.326981	0.19645
1970	CUST_528_PI380538646	zams24_O18_065	zams24_O18_065.ab1	0.16187	0.333364	-0.445655	0	-0.181644	0
1971	CUST_7_PI380538644	zams18_J13_055	#N/A	0	0	-0.0631838	0	0	0
1972	CUST_6399_PI379238085	3498858_2	Contig0719_ext	0.374047	0.403641	-0.207384	-0.332282	-0.179154	-0.347592
1973	CUST_2838_PI379238085	3509176_1	3509176_1	1.40141	1.17428	-1.55365	0	-1.44375	0
1974	CUST_7436_PI379238085	3506396_2	Contig0994	-0.687422	-0.589601	0.606148	0.361175	0.477336	0.362133
1975	CUST_287_PI380538644	zams18_N22_083	#N/A	0	0	0	0	0	0
1976	CUST_476_PI379238085	3498508_1	3498508_1	-0.0269272	-0.0132462	0.0370864	-0.363472	0.0288735	-0.284761
1977	CUST_6674_PI379238085	3497115_3	Contig0551	0.0546976	0.0510447	-0.0353469	0.0664221	-0.0232557	0.0989808
1978	CUST_6176_PI379238085	3498447_2	3498447_2	0.0132738	0.0261789	-0.187675	-0.458648	-0.247029	-0.378577
1979	CUST_81_PI380567544	DQ827719.1	DQ827719.1	0	0	0	0	0	0
1980	CUST_150_PI380538640	zams10_H08_026	#N/A	0	-0.0659813	0	0	0	0
1981	CUST_3544_PI379238085	3500682_2	3500682_2	0.388501	0.228459	-0.574228	0	-0.515379	0
1982	CUST_288_PI379238087	zaFBplate1_H02_009.ab1	Contig0306	-1.33651	-1.26484	1.43236	0.328243	1.47929	0.339607
1983	CUST_1720_PI379238085	3498981_2	3498981_2	0	0	0	0	-0.243312	0
1984	CUST_89_PI380538648	zamn04_C17_077	zamn04_C17_077.ab1	0	0	0	0	0	0
1985	CUST_3946_PI379238085	3497772_2	3497772_2	-0.272654	-0.221956	0.371539	0.0730899	0.435088	0.0644187
1986	CUST_349_PI380538648	zamn02_D10_045	zamn02_D10_045.ab1	0.513938	0.296969	-0.175469	0	-0.200535	0
1987	CUST_77_PI380567544	Ph_brachyury	Ph_brachyury	-0.197662	0	0	0	0	0
1988	CUST_28_PI380538640	zams08_E11_044	#N/A	-0.0746606	-0.106258	0.123042	-0.486259	0.182935	-0.505634
1989	CUST_1485_PI379238085	3497528_1	Contig0600	-0.323843	-0.27308	0.385324	0.060795	0.442976	0.0679134
1990	CUST_5980_PI379238085	3498714_1	3498714_1	0.667988	0.73954	-0.676508	-0.888201	-0.682752	-0.821402
1991	CUST_37_PI379238087	zaFBplate1_M16_052.ab1	Contig0520	-0.175504	0.163455	-0.0543899	0	-0.124615	-0.00554674
1992	CUST_5766_PI379238085	3506386_1	3506386_1	-0.256663	-0.391406	0	0	-0.0941423	0
1993	CUST_31_PI380567544	Ph_Wnt-Gr3,	Ph_Wnt-Gr3,	0	0.256064	0	0	0	0
1994	CUST_45_PI380567544	Ph_tinman,	Ph_tinman,	0	0	0	0	0	0
1995	CUST_3273_PI379238085	3502393_2	3502393_2	-0.028847	0	0	0	0	0
1996	CUST_103_PI380567544	Ph_GATA,	Ph_GATA,	0	0	0	0	0	0
1997	ETG02_36680	ETG02_36680	ETG02_36680	0	0	0	0	0	0
1998	CUST_8787_PI379238085	3500564_1	3500564_1	-0.347478	-0.349509	0.353225	0.840442	0.375238	0.747829
1999	CUST_9235_PI379238085	3506757_2	3506757_2	-1.36959	-1.52842	1.65417	0.959717	1.72331	0.962124
[truncated: 13,746 more rows]

## Sheet: processed_annotated_results
ControlType	TargetContig	Sequence description	min. eValue	GOs	MultiSpot	MultiProbe	logFC	AveExpr	t	P.Value	adj.P.Val	B
0	3495773_1	nadh dehydrogenase subunit 1	8.89e-104	C:mitochondrion; P:oxidation reduction; F:oxidoreductase activity; C:integral to membrane; C:membrane; F:NADH dehydrogenase (ubiquinone) activity	2	2	-0.936881	15.4481	-18.0342	3.60634e-07	2.61039e-05	6.72251
0	3495778_1	nudix (nucleoside diphosphate linked moiety x)-type motif 1	3.17e-34	P:response to oxidative stress; P:dGTP catabolic process; F:hydrolase activity; C:cytoplasm; P:DNA repair; C:C; F:protein binding; F:8-oxo-7,8-dihydroguanine triphosphatase activity; F:GTPase activity	2	2	1.25635	7.81105	26.6845	2.34706e-08	3.02415e-06	9.78415
0	3495780_1	dead (asp-glu-ala-asp) box polypeptide 27	5.44e-94	F:helicase activity; P:auxin biosynthetic process; C:nucleus; F:hydrolase activity; F:nucleic acid binding; F:nucleotide binding; F:F; F:ATP binding; F:ATP-dependent helicase activity; C:C; F:protein binding; P:P	2	2	1.196	10.2565	15.7052	9.37983e-07	5.56916e-05	5.645
0	3495782_1	lamin	4.91e-70	P:startle response; P:regulation of cell adhesion; P:mesoderm development; P:nuclear envelope organization; P:terminal branching, open tracheal system; C:intermediate filament; P:brain morphogenesis; P:embryonic morphogenesis; C:nuclear lamina; P:peripheral nervous system development; C:lipid particle; P:chromatin silencing; P:regulation of cell migration; P:locomotion involved in locomotory beha…	2	2	0.251663	7.03729	5.09769	0.00136355	0.0308052	-2.54503
0	3495782_2	lamin	6.76e-59	C:intermediate filament; F:structural molecule activity	2	2	0.235848	12.0225	4.9569	0.00159891	0.0356554	-2.72137
0	3495785_1	es1 protein	1.12e-71	C:mitochondrion; F:F; P:P; C:centriole; C:C	2	2	-0.056191	10.6274	-0.867098	0.414361	1	-8.35598
0	3495798_2	clathrin light chain	8.25e-31	C:clathrin coat of trans-Golgi network vesicle; P:vesicle-mediated transport; F:structural molecule activity; P:intracellular protein transport; F:protein binding; C:clathrin coat of coated pit	2	2	-0.328278	11.5631	-7.58335	0.000122068	0.00355415	0.151657
0	3495803_1	heterogeneous nuclear ribonucleoprotein	3.82e-69	F:nucleic acid binding; F:nucleotide binding; C:ribonucleoprotein complex	2	2	0.705129	14.7042	10.406	1.54017e-05	0.000597079	2.4847
0	3495808_3	protein yif1b (yip1-interacting factor homolog b)	4.24e-42	P:vesicle-mediated transport; C:integral to membrane; C:endoplasmic reticulum; C:membrane; C:Golgi apparatus; P:protein transport; P:transport	2	2	-0.116827	6.83906	-2.36015	0.0499992	0.853311	-6.42013
0	3495809_3	isochorismatase domain-containing protein mitochondrial precursor	5.14e-60	C:mitochondrion; F:isochorismatase activity; P:metabolic process; F:hydrolase activity; F:catalytic activity; P:P; F:protein binding; F:identical protein binding	2	2	-1.545	10.8241	-34.1796	4.1314e-09	9.03452e-07	11.705
0	3495814_1	insulin-like growth factor binding protein 7	2.85e-11	P:cellular response to hormone stimulus; P:response to cortisol stimulus; P:regulation of cell growth; P:embryo implantation; P:regulation of steroid biosynthetic process; C:extracellular region; F:insulin-like growth factor binding; P:response to heat; F:protein binding; P:negative regulation of cell proliferation; P:response to retinoic acid; P:response to organic cyclic substance; P:cell adhes…	2	2	-1.92868	8.92107	-35.8861	2.93317e-09	7.28621e-07	12.0801
0	3495815_1	transport protein sec61 subunit gamma	2.11e-28	F:protein transporter activity; P:intracellular protein transport; P:reproduction; P:nematode larval development; F:F; P:protein targeting; C:endoplasmic reticulum membrane; C:integral to membrane; C:membrane; P:ovulation; P:embryonic development ending in birth or egg hatching; C:endoplasmic reticulum; F:P-P-bond-hydrolysis-driven protein transmembrane transporter activity; P:growth; P:protein t…	2	2	2.01292	10.952	31.7464	6.94108e-09	1.25678e-06	11.1343
0	3495816_3	red protein	1.14e-54	P:cell-cell signaling; C:extracellular space; C:soluble fraction; P:immune response; C:nucleus	2	2	-0.873526	8.45288	-13.1565	3.15892e-06	0.00015375	4.27409
0	3495821_5	ras-related c3 botulinum toxin substrate 1 (rho small gtp binding protein rac1)	9.59e-102	P:regulation of synapse organization; P:Rac protein signal transduction; P:actin filament polymerization; F:protein binding; P:regulation of respiratory burst; P:hemocyte development; P:regulation of cell migration; P:cell proliferation; P:ventral cord development; P:axonal fasciculation; P:localization within membrane; P:response to wounding; P:actin filament bundle assembly; P:axon guidance; P:…	2	2	-0.190602	7.73605	-2.44489	0.0441224	0.762019	-6.29228
0	3495823_1	methionine-trna synthetase	2.55e-76	F:ligase activity; P:tRNA aminoacylation for protein translation; P:lysosome organization; F:methionine-tRNA ligase activity; C:mitochondrion; F:nucleotide binding; C:cytoplasm; P:translation; F:ATP binding; C:mitochondrial matrix; P:methionyl-tRNA aminoacylation; F:aminoacyl-tRNA ligase activity	2	2	0.336717	7.10253	6.88674	0.000224303	0.00609909	-0.531479
0	3495823_2	methionine-trna synthetase	3.79e-56	F:ligase activity; P:tRNA aminoacylation for protein translation; C:mitochondrion; P:lysosome organization; F:methionine-tRNA ligase activity; F:nucleotide binding; C:cytoplasm; P:translation; F:ATP binding; P:methionyl-tRNA aminoacylation; F:aminoacyl-tRNA ligase activity	2	2	0.893926	7.41436	12.3766	4.78772e-06	0.000216721	3.80437
0	3495829_3	glutamyl-prolyl trna synthetase isoform 2	3.03e-136	F:ligase activity; F:SUMO binding; P:auxin biosynthetic process; P:tRNA aminoacylation for protein translation; F:proline-tRNA ligase activity; F:nucleotide binding; C:cytoplasm; P:translation; F:ATP binding; F:glutamate-tRNA ligase activity; P:prolyl-tRNA aminoacylation; C:aminoacyl-tRNA synthetase multienzyme complex; F:aminoacyl-tRNA ligase activity; F:ligase activity, forming aminoacyl-tRNA a…	1	1	0.239468	7.56952	3.39142	0.0114133	0.219177	-4.86881
0	3495830_7	ubiquitin-conjugating enzyme e2 a	1.86e-79	P:response to UV; F:ubiquitin protein ligase binding; C:nuclear chromatin; P:positive regulation of cell proliferation; P:reproduction; P:ubiquitin-dependent protein catabolic process; P:in utero embryonic development; P:nematode larval development; F:F; F:ATP binding; P:maternal process involved in female pregnancy; P:protein ubiquitination; F:ligase activity; P:growth; F:ubiquitin-protein ligas…	2	2	0.278511	8.26343	3.77528	0.00681516	0.136173	-4.31197
0	3495834_2	transcription elongation factor	3.72e-46	F:translation elongation factor activity; P:positive regulation of transcription; F:chromatin binding; P:non-covalent chromatin modification; F:zinc ion binding; F:positive transcription elongation factor activity; C:nucleus	2	2	-1.07232	11.1112	-15.9375	8.47686e-07	5.15122e-05	5.75919
0	3495836_1	phosphopantothenoylcysteine decarboxylase	2.01e-26	P:coenzyme A biosynthetic process; F:F; F:phosphopantothenoylcysteine decarboxylase activity; F:catalytic activity; P:P; F:carboxy-lyase activity; F:lyase activity; C:C	2	2	-0.494751	10.1655	-6.37983	0.000360115	0.00934598	-1.06179
0	3495840_1	39s ribosomal protein mitochondrial precursor	1.88e-53	C:nuclear membrane; F:structural constituent of ribosome; C:mitochondrion; P:translation; C:large ribosomal subunit; C:ribosome; C:nucleus; C:intracellular	2	2	-0.186966	8.0288	-2.87174	0.0236904	0.431591	-5.64567
0	3495840_2	39s ribosomal protein mitochondrial precursor	1.08e-63	C:nuclear membrane; F:structural constituent of ribosome; C:mitochondrion; P:translation; C:large ribosomal subunit; C:ribosome; C:nucleus; C:intracellular	2	2	-1.48926	10.4102	-18.611	2.89886e-07	2.18992e-05	6.96836
0	3495845_2	s-adenosylmethionine synthetase isoform type-1	6.2e-21	F:transferase activity; P:S-adenosylmethionine biosynthetic process; P:auxin biosynthetic process; P:circadian rhythm; P:response to drug; F:nucleotide binding; C:cytoplasm; P:response to light stimulus; P:one-carbon metabolic process; F:ATP binding; F:methionine adenosyltransferase activity; C:C; F:protein binding; P:response to cAMP; P:response to hormone stimulus; F:metal ion binding; F:magnes…	2	2	1.13634	13.327	19.2466	2.29589e-07	1.80291e-05	7.23073
0	3495852_2	proteophosphoglycan ppg4	0.00029	0	2	2	-3.29558	9.42796	-43.9156	7.08211e-10	2.6496e-07	13.6184
0	3495854_1	endonuclease-reverse transcriptase	3.46e-13	F:RNA binding; P:RNA-dependent DNA replication; F:RNA-directed DNA polymerase activity	2	2	0.881352	7.75192	4.68504	0.00219175	0.0477609	-3.06983
0	3495855_1	u2 small nuclear ribonucleoprotein a	2.66e-68	F:nucleic acid binding; C:ribonucleoprotein complex; F:protein binding	2	2	0.657963	10.7963	12.0434	5.76112e-06	0.000254115	3.5953
0	3495861_2	protein phosphatase	6.94e-14	F:hydrolase activity; F:catalytic activity; F:phosphoprotein phosphatase activity	1	1	1.03383	10.4491	8.38105	6.41323e-05	0.00203752	0.875871
0	3495861_3	abc transporter -related protein	1.32e-08	F:kinase activity	2	2	2.54942	9.33739	43.6104	7.43858e-10	2.72472e-07	13.5658
0	3495863_1	pterin-4-alpha-carbinolamine dehydratase	2.91e-28	P:protein homotetramerization; P:protein heterooligomerization; C:nucleus; C:mitochondrion; F:phenylalanine 4-monooxygenase activity; C:cytoplasm; P:tetrahydrobiopterin biosynthetic process; F:lyase activity; F:protein binding; F:4-alpha-hydroxytetrahydrobiopterin dehydratase activity; P:transcription; P:regulation of transcription	2	2	1.61744	8.83641	31.2902	7.68365e-09	1.35365e-06	11.0222
0	3495867_1	microsomal glutathione s-transferase 3	1.37e-38	F:transferase activity; C:integral to membrane; C:membrane; P:response to organic nitrogen; C:microsome; C:C; F:glutathione peroxidase activity; C:endoplasmic reticulum; F:glutathione transferase activity; P:P	2	2	0.572571	9.27727	10.0717	1.91489e-05	0.000721277	2.23886
0	3495868_1	prolyl endopeptidase	0	F:endopeptidase activity; F:serine-type endopeptidase activity; F:metalloendopeptidase activity; C:mitochondrion; C:nucleus; F:hydrolase activity; F:peptide binding; C:cytoplasm; F:zinc ion binding; F:metallopeptidase activity; F:serine-type peptidase activity; F:catalytic activity; F:peptidase activity; P:proteolysis; P:protein metabolic process; F:metal ion binding; C:cytosol	2	2	0.81821	7.79042	13.7325	2.35753e-06	0.000120247	4.60459
0	3495870_1	dna polymerase gamma	9.96e-147	P:DNA synthesis involved in DNA repair; P:mismatch repair; F:exonuclease activity; C:mitochondrial inner membrane; P:mitochondrial DNA replication; F:protease binding; F:DNA binding; P:DNA-dependent DNA replication; P:DNA replication; C:mitochondrial nucleoid; F:DNA-directed DNA polymerase activity; C:mitochondrion; P:DNA metabolic process; F:nucleotidyltransferase activity; P:base-excision repai…	2	2	-0.979797	11.091	-18.3296	3.22214e-07	2.38796e-05	6.84934
0	3495871_2	exonuclease domain containing 1	8.46e-43	F:hydrolase activity; F:nucleic acid binding; F:zinc ion binding; F:F; F:exonuclease activity; C:C; C:intracellular; F:metal ion binding; P:P	2	2	0.144282	7.02947	3.2578	0.0137247	0.259712	-5.06644
0	3495875_2	kinetochore associated 1	2.45e-36	C:nucleus; P:mitosis; P:regulation of exit from mitosis; C:condensed chromosome kinetochore; C:kinetochore; C:cytoplasm; F:F; P:mitotic cell cycle checkpoint; P:cell division; C:C; C:spindle pole; P:protein complex assembly; F:protein binding; P:P; P:cell cycle; C:kinetochore microtubule; C:cytoskeleton	2	2	-1.70048	10.0522	-35.8813	2.93597e-09	7.28621e-07	12.079
0	3495878_1	dna-dependent protein kinase catalytic subunit	5.18e-08	F:transferase activity; F:DNA-dependent protein kinase activity; C:nucleus; F:DNA binding; F:nucleotide binding; F:ATP binding; F:RNA-directed DNA polymerase activity; F:RNA binding; F:kinase activity; P:double-strand break repair via nonhomologous end joining; P:DNA repair; P:RNA-dependent DNA replication; F:phosphotransferase activity, alcohol group as acceptor	2	2	2.98137	8.35316	8.0999	7.99814e-05	0.00246513	0.62722
0	3495882_2	cuticular protein	8.26e-11	F:chitin binding; P:chitin metabolic process; C:extracellular region	2	2	1.71078	7.71748	18.2663	3.30036e-07	2.4372e-05	6.82234
0	3495882_3	cuticular protein	1.79e-10	F:chitin binding; P:chitin metabolic process; C:extracellular region	2	2	2.39654	7.98495	30.2869	9.65874e-09	1.59962e-06	10.7694
0	3495886_2	electron transfer flavoprotein subunit mitochondrial precursor	5.43e-111	C:mitochondrion; F:oxidoreductase activity; F:electron carrier activity; C:mitochondrial matrix; P:electron transport chain; P:transport; F:FAD binding	1	1	0.0554603	11.8666	0.806232	0.44639	1	-8.40885
0	3495887_1	domain-containing protein	7.69e-20	P:flocculation; P:pathogenesis; C:outer membrane	2	2	0.140874	6.59991	2.87278	0.023655	0.431072	-5.64409
0	3495892_1	homology subfamily a member 5	4.16e-67	F:binding; P:reproduction	2	2	-1.44697	9.82075	-11.9678	6.01217e-06	0.000264063	3.54712
0	3495895_1	adp-ribosylation factor 1	1.44e-99	C:cytosol; P:regulation of cell shape; P:post-Golgi vesicle-mediated transport; P:small GTPase mediated signal transduction; C:Golgi membrane; P:retrograde vesicle-mediated transport, Golgi to ER; F:receptor signaling protein activity; P:protein amino acid ADP-ribosylation; P:cell adhesion; P:neurotransmitter secretion; F:protein binding; P:COPI coating of Golgi vesicle; F:GTPase activity; C:peri…	2	2	0.570347	8.42159	10.1652	1.80058e-05	0.000683945	2.30834
0	3495898_2	dna polymerase delta subunit 2	4.93e-30	F:DNA-directed DNA polymerase activity; P:DNA replication; P:nucleotide-excision repair, DNA gap filling; C:nucleoplasm; F:protein binding	2	2	-0.100105	7.92121	-0.565622	0.589152	1	-8.58513
0	3495898_4	polymerase (dna directed) delta regulatory subunit 50kda	1.95e-42	P:DNA replication; P:nucleotide-excision repair, DNA gap filling; C:nucleoplasm; F:protein binding; F:nucleotidyltransferase activity	2	2	-0.310506	8.08	-4.44464	0.00292265	0.0625037	-3.38676
0	3495902_3	atpase aaa domain containing 3a	3.72e-93	C:mitochondrial inner membrane; F:protein binding; F:nucleotide binding	2	2	-0.897942	9.40191	-22.0865	8.8052e-08	8.31073e-06	8.3069
0	3495904_3	golgi-specific brefeldin a-resistance guanine nucleotide exchange factor 1	3.46e-09	F:transposase activity; P:DNA integration; P:transposition, DNA-mediated; F:DNA binding	2	2	0.850762	7.15854	13.2574	2.99861e-06	0.000147449	4.33292
0	3495906_2	actin	0	C:Ino80 complex; P:maintenance of protein location in cell; P:sperm individualization; P:auxin biosynthetic process; P:cytokinesis; P:mushroom body development; P:cytoskeleton organization; P:phagocytosis, engulfment; F:ATP binding; F:protein binding; F:structural constituent of cytoskeleton; C:actin filament; P:inter-male aggressive behavior; C:lipid particle	2	2	3.7478	11.4175	33.0822	5.19621e-09	1.04106e-06	11.4531
0	3495908_1	acidic fibroblast growth factor intracellular binding protein	3.95e-75	C:cell part	2	2	-0.543629	7.884	-6.4891	0.000324421	0.00850491	-0.944971
0	3495909_1	subfamily member 10	5.11e-35	F:protein disulfide isomerase activity; F:heat shock protein binding; C:extracellular region; C:endoplasmic reticulum lumen; F:isomerase activity; P:protein folding; C:endoplasmic reticulum; P:cell redox homeostasis; F:unfolded protein binding	2	2	-2.17447	10.971	-26.149	2.70506e-08	3.39926e-06	9.62606
0	3495909_2	subfamily member 10	2.5e-51	F:protein binding	2	2	-0.259729	7.64714	-5.45944	0.000917008	0.0214262	-2.10456
0	3495909_3	subfamily member 10	1.21e-47	F:protein binding	2	2	0.0399996	6.72342	0.76046	0.471587	1	-8.4465
0	3495910_3	rna binding motif protein 4b	2.38e-12	F:binding; P:RNA processing; C:intracellular part	1	1	-0.174606	13.1531	-3.02797	0.018953	0.350947	-5.41006
0	3495911_1	surfeit 6	7.13e-07	F:heme transporter activity; P:respiratory chain complex IV assembly; C:nucleolus	2	2	0.683914	10.2291	11.2923	8.90057e-06	0.000369993	3.10395
0	3495912_2	intracellular fatty acid binding protein	4.71e-31	F:lipid binding; F:binding; F:transporter activity; P:transport	1	1	2.86102	11.9602	25.7828	2.98585e-08	3.58131e-06	9.51599
0	3495913_1	ubiquitin-like domain-containing ctd phosphatase 1	8.14e-102	F:hydrolase activity	2	2	-0.140062	7.61273	-2.73285	0.0289522	0.517135	-5.85597
0	3495916_3	signal recognition particle receptor beta subunit	1.72e-37	P:chitin-based larval cuticle pattern formation; P:negative regulation of autophagy; P:endoplasmic reticulum unfolded protein response; P:lysosome organization	2	2	-0.228946	10.7866	-3.9391	0.00550539	0.111554	-4.07989
0	3495921_1	laminin a	3.36e-46	P:cell migration; P:system development; P:regulation of cellular process; C:proteinaceous extracellular matrix	2	2	-0.967505	7.58516	-8.61426	5.36467e-05	0.00174071	1.07698
0	3495924_3	dead box atp-dependent rna helicase	8.62e-54	P:auxin biosynthetic process; F:ATP-dependent helicase activity; F:ATP binding	2	2	1.78777	8.23024	18.1393	3.46396e-07	2.53391e-05	6.76786
0	3495926_1	transposase homolog	1.02e-08	P:DNA metabolic process	2	2	0.336556	8.28521	5.2175	0.00119333	0.0271911	-2.39714
0	3495927_1	acid phosphatase-1	7.26e-35	C:cell part	2	2	3.52599	9.82915	24.1707	4.69057e-08	5.02255e-06	9.01182
0	3495930_2	growth arrest and dna-damage- gamma interacting protein 1	1.31e-20	P:cell cycle; C:nucleus	2	2	-0.43866	8.64481	-3.69677	0.00755986	0.149715	-4.42442
0	3495931_1	cg11966- partial	2.61e-26	F:zinc ion binding; F:nucleic acid binding; C:intracellular	2	2	0.153458	6.68172	2.58698	0.0358113	0.631595	-6.07715
0	3495933_1	aspartylglucosaminidase	1.7e-79	F:protein self-association; C:lysosome; F:N4-(beta-N-acetylglucosaminyl)-L-asparaginase activity; P:protein deglycosylation; P:protein maturation	2	2	-0.0240492	6.63765	-0.424728	0.683669	1	-8.66204
0	3495943_2	transmembrane protein 48	4.38e-18	C:cell part; P:localization	2	2	-0.76188	7.61705	-18.4375	3.09348e-07	2.30084e-05	6.89522
0	3495950_5	elongation factor tu	6.47e-10	F:translation elongation factor activity; F:GTP binding; C:intracellular; P:translational elongation; F:GTPase activity	2	2	-0.0573801	7.31384	-1.01254	0.344686	1	-8.2174
0	3495951_2	heat shock protein 67b2	2.39e-20	F:thiosulfate sulfurtransferase activity; F:F; P:response to stress; F:transferase activity; P:P; C:C	2	2	-0.19094	8.14381	-2.24733	0.0590826	0.989248	-6.58948
0	3495956_1	hemocyanin subunit 1	2.93e-133	P:transport; F:oxygen transporter activity; P:metabolic process; F:oxidoreductase activity	2	2	0.0692314	6.80875	1.17693	0.277342	1	-8.04193
0	3495956_2	hemocyanin subunit 1	2.85e-108	P:transport; F:oxygen transporter activity; P:metabolic process; F:oxidoreductase activity	2	2	0.0782675	6.51157	1.82144	0.110935	1	-7.21167
0	3495957_3	juvenile hormone esterase	2.33e-56	F:hydrolase activity; F:carboxylesterase activity	2	2	1.25724	7.83268	24.6176	4.12657e-08	4.52792e-06	9.15495
0	3495961_3	keratin associated protein 4-12 isoform 1	6.76e-05	C:nuclear pore; P:P; P:protein import into nucleus; C:C	2	2	0.314912	8.87555	6.70738	0.000264383	0.0070717	-0.715772
0	3495963_2	atp-dependent rna	2.08e-40	P:cellular process; F:binding; F:hydrolase activity	2	2	0.438807	8.35764	6.2326	0.000415373	0.0105854	-1.22144
0	3495964_1	proteophosphoglycan ppg4	4.12e-06	0	2	2	-0.00329921	6.62586	-0.0521821	0.959828	1	-8.76213
0	3495970_1	uncharacterized conerved protein	3.66e-39	P:oxidation reduction; C:lipid particle; F:oxidoreductase activity; C:C	2	2	-1.60562	8.13534	-16.1263	7.8157e-07	4.82979e-05	5.85079
0	3495971_1	cellular senescence inhibited gene protein	1.34e-22	F:structural constituent of ribosome; P:RNA processing; C:nucleus; P:translation; F:RNA binding; C:ribosome; C:nucleolus; P:regulation of protein localization; F:protein binding; C:intracellular	2	2	1.24766	11.3091	22.3738	8.04591e-08	7.73515e-06	8.40796
0	3495973_2	dna polymerase delta subunit 3	4.31e-30	P:DNA metabolic process; F:transferase activity; C:nucleus	2	2	-0.684465	7.54442	-13.8285	2.24786e-06	0.000115757	4.65839
0	3495977_1	integrator complex subunit 4	7.66e-22	C:membrane coat; C:integrator complex; F:binding; P:snRNA processing; P:vesicle-mediated transport; P:intracellular protein transport; F:protein binding; C:nucleus	2	2	-1.43563	8.9817	-13.8651	2.2075e-06	0.000114152	4.67885
0	3495978_3	hypothetical protein BRAFLDRAFT_76038 [Branchiostoma floridae]	4.94e-50	F:nucleic acid binding; F:zinc ion binding; C:intracellular	2	2	-0.107177	6.85531	-1.73611	0.125721	1	-7.3313
0	3495979_1	trypsin	1.16e-66	F:peptidase activity	2	2	1.84806	10.1764	22.8391	6.96901e-08	6.95836e-06	8.56891
0	3495982_1	fidgetin-like 1	2.09e-17	P:cellular metabolic process; F:hydrolase activity; F:nucleotide binding	2	2	-0.157691	9.83211	-2.85458	0.0242822	0.441206	-5.67162
0	3495982_2	fidgetin-like 1	3.02e-81	P:ATP metabolic process; F:hydrolase activity; F:magnesium ion binding; F:nucleotide binding	2	2	-0.0965112	7.16128	-1.62761	0.147231	1	-7.47998
0	3495984_4	nadh dehydrogenase	0	F:4 iron, 4 sulfur cluster binding; P:mitochondrial electron transport, NADH to ubiquinone; F:NAD or NADH binding; F:NADH dehydrogenase (ubiquinone) activity; F:FMN binding	2	2	-0.876507	9.03369	-7.79537	0.000102338	0.00305562	0.349884
0	3495984_5	gem (nuclear organelle) associated protein 7	2.02e-08	0	2	2	-0.599122	7.33683	-7.62063	0.000118308	0.00346254	0.186823
0	3495992_1	icarus cg9031-pa	2.82e-82	P:negative regulation of JNK cascade; P:negative regulation of JUN kinase activity; F:protein binding; P:apposition of dorsal and ventral imaginal disc-derived wing surfaces	2	2	-0.387638	9.57925	-3.09878	0.0171466	0.319402	-5.30375
0	3495996_2	cleavage stimulation factor 64-kda subunit	3.66e-57	F:mRNA binding; C:mRNA cleavage stimulating factor complex; P:mRNA cleavage; F:nucleotide binding	2	2	0.0947006	6.90432	1.832	0.109226	1	-7.19673
0	3495998_2	60s ribosomal protein l39	8.35e-17	C:ribosome; F:structural constituent of ribosome; P:translation	2	2	0.883903	7.38589	17.5844	4.29606e-07	2.98901e-05	6.52539
0	3495999_1	ccr4-not transcription subunit 1	3.17e-132	F:protein binding; P:regulation of transcription	2	2	-1.18706	8.2184	-22.255	8.3504e-08	7.96622e-06	8.36634
0	3496002_1	rna (guanine-9-)-methyltransferase domain-containing protein 1 mitochondrial	7.33e-57	F:methyltransferase activity; F:F; F:transferase activity; P:P	2	2	-1.02185	11.103	-16.162	7.69731e-07	4.77563e-05	5.868
0	3496003_3	stromal antigen	3.69e-47	P:mitotic spindle elongation; F:protein binding; C:ribosome; P:gene expression; P:nucleic acid metabolic process; P:male meiosis I; C:extracellular region; C:nucleolus; P:cellular macromolecule biosynthetic process; P:spermatid development; F:DNA binding; P:response to peptidoglycan; P:regulation of Toll signaling pathway; P:segment specification; C:lipid particle; F:muramyl dipeptide binding; P:…	2	2	-1.10246	11.0509	-25.9596	2.84635e-08	3.49694e-06	9.56933
0	3496008_2	wd-repeat protein	6.97e-75	0	2	2	0.170921	7.72241	3.30559	0.0128451	0.244333	-4.99557
0	3496009_2	pol-like protein	4.41e-09	F:nucleic acid binding; F:RNA binding; F:ribonuclease H activity; P:RNA-dependent DNA replication; F:RNA-directed DNA polymerase activity	2	2	-0.561196	7.86264	-4.44292	0.00292878	0.0626134	-3.38906
0	3496018_2	o- family 3	1.14e-60	F:O-methyltransferase activity	2	2	-0.0574521	6.9889	-0.891305	0.402094	1	-8.33409
0	3496019_1	x-prolyl aminopeptidase (aminopeptidase p) soluble	0	F:metalloaminopeptidase activity; F:manganese ion binding; P:proteolysis; C:cytosol; F:protein homodimerization activity; P:bradykinin catabolic process	2	2	-1.11302	10.5484	-10.7828	1.21389e-05	0.000484435	2.7535
0	3496025_2	apoptosis antagonizing transcription factor	2.3e-26	P:negative regulation of oxygen and reactive oxygen species metabolic process; P:positive regulation of transcription; F:protein domain specific binding; P:regulation of apoptosis; C:cytoplasmic part; C:nucleus	2	2	2.40934	9.33565	29.5173	1.15705e-08	1.82303e-06	10.5695
0	3496026_2	acid phosphatase lysosomal	5.58e-29	C:cell part	2	2	1.57045	7.86089	28.7123	1.40471e-08	2.10723e-06	10.3546
0	3496026_4	protein dna catalytic polypeptide	3.45e-10	0	2	2	1.55908	7.63896	31.0415	8.12625e-09	1.40972e-06	10.9603
0	3496026_6	acid prostate	1.22e-07	C:secretory granule; P:dephosphorylation; C:membrane; C:multivesicular body; F:hydrolase activity; C:apical part of cell; F:acid phosphatase activity; C:lysosomal membrane; C:extracellular region; F:choline binding; C:Golgi cisterna	2	2	5.92019	10.9642	52.2059	2.09379e-10	1.14549e-07	14.908
0	3496029_1	translation initiation factor	1.36e-126	P:negative regulation of translation; C:axon; F:ribosome binding; P:neuron fate commitment; P:long-term memory; C:neuronal cell body; P:axon midline choice point recognition; P:oogenesis; C:cytoplasm; F:translation initiation factor binding	2	2	0.440838	13.7421	9.82659	2.25563e-05	0.000828909	2.05402
0	3496030_1	ccr4-not transcription subunit 3	6.74e-82	C:cytoplasm; F:transcription regulator activity; P:regulation of transcription; F:protein binding; C:nucleus	2	2	-0.331755	7.27245	-4.19188	0.00399206	0.0833087	-3.72885
0	3496037_3	tbc1 domain member 20	1.02e-69	C:cell part	2	2	0.0168778	6.90201	0.374503	0.719016	1	-8.68443
0	3496040_3	protein	7.1e-19	0	2	2	-0.087857	7.06809	-1.38734	0.207519	1	-7.79241
0	3496044_1	ubiquitin carboxyl-terminal hydrolase isozyme l3	1.5e-78	C:cytoplasm; F:peptidase activity; P:protein deubiquitination; P:eating behavior; F:protein binding; P:ubiquitin-dependent protein catabolic process; F:ubiquitin thiolesterase activity; P:adult walking behavior	2	2	0.0829605	8.01992	1.32593	0.226116	1	-7.86782
0	3496048_2	PREDICTED: similar to GA20474-PA [Nasonia vitripennis]	0.000112	0	2	2	-0.0425384	11.4956	-0.994379	0.352862	1	-8.2356
0	3496056_1	u3 small nucleolar rna-associated protein 15 homolog	8.65e-32	F:transferase activity; C:nucleus; P:rRNA processing; C:cytoplasm; F:F; F:myosin heavy chain kinase activity; C:C; C:nucleolus; P:P	2	2	1.61961	8.99947	25.9028	2.89032e-08	3.51967e-06	9.55224
0	3496056_2	u3 small nucleolar rna-associated	1.5e-46	C:intracellular part	2	2	0.722182	7.17049	8.83978	4.53146e-05	0.00150495	1.2672
0	3496057_1	vacuolar atp synthase subunit g	5.66e-12	P:ion transport; C:membrane part	2	2	0.293729	11.8944	5.67258	0.000731734	0.017519	-1.85336
0	3496059_1	coiled-coil-helix-coiled-coil-helix domain containing 6	1.3e-13	C:mitochondrion; C:mitochondrial inner membrane	2	2	-0.437718	11.0477	-9.43564	2.95116e-05	0.00104972	1.75077
0	3496063_1	cdc5 cell division cycle 5-like ( pombe)	4.91e-74	C:nucleolus; P:regulation of transcription, DNA-dependent; C:nuclear speck; F:DNA binding; F:protein domain specific binding	2	2	-1.51557	10.1141	-28.7955	1.3765e-08	2.08496e-06	10.3771
0	3496069_2	wd repeat domain 89	8.95e-34	C:clathrin coat of trans-Golgi network vesicle; P:vesicle-mediated transport; F:structural molecule activity; P:intracellular protein transport; F:protein binding; C:clathrin coat of coated pit	2	2	1.40032	9.35692	26.097	2.74308e-08	3.41585e-06	9.61051
0	3496070_2	cathepsin c	9.97e-56	F:peptidase activity; C:lysosome; F:protein binding; P:immune response	2	2	1.73819	9.06796	14.6472	1.51546e-06	8.34377e-05	5.10356
0	3496073_1	ribosomal protein s28	1.99e-20	F:structural constituent of ribosome; F:protein binding; P:rRNA processing; C:cytosolic small ribosomal subunit; P:ribosomal small subunit biogenesis; P:translational elongation	2	2	3.40349	11.044	76.8928	1.36312e-11	2.2055e-08	17.6455
0	3496076_2	eukaryotic translation initiation factor 4b	5.52e-20	C:eukaryotic translation initiation factor 4F complex; F:nucleic acid binding; P:regulation of translational initiation; C:cytosol	2	2	0.126403	6.76818	3.09897	0.017142	0.319402	-5.30347
0	3496077_1	trna (5-methylaminomethyl-2-thiouridylate)-methyltransferase	6.38e-85	F:methyltransferase activity; P:tRNA modification; C:cytoplasm; P:tRNA processing; F:transferase activity	2	2	0.283428	8.01838	6.06841	0.000488485	0.0122476	-1.40261
0	3496085_1	lipoprotein vsaa	1.52e-08	P:neuropeptide signaling pathway; F:F; F:actin binding; P:P; P:cellular component organization; C:extracellular region; C:C; P:actin cytoskeleton organization	2	2	1.11819	9.63075	11.9749	5.98781e-06	0.000263552	3.55171
0	3496086_1	protoporphyrinogen oxidase	9.32e-52	C:mitochondrial intermembrane space; P:protoporphyrinogen IX metabolic process; P:heme biosynthetic process; F:oxygen-dependent protoporphyrinogen oxidase activity; C:mitochondrial inner membrane; F:FAD binding; P:synaptic transmission; C:synaptic vesicle; P:regulation of cellular process; P:oxidation reduction	2	2	0.123318	6.77182	2.25823	0.0581364	0.976089	-6.57317
0	3496086_2	protoporphyrinogen oxidase	8.01e-45	P:porphyrin biosynthetic process	1	1	-1.87951	10.4532	-30.1029	1.00807e-08	1.64753e-06	10.7221
0	3496086_3	protoporphyrinogen oxidase	3.6e-101	P:metabolic process	2	2	-0.900038	8.0152	-14.6151	1.53848e-06	8.43956e-05	5.08654
0	3496089_2	endonuclease and reverse transcriptase-like protein	3.67e-06	F:RNA binding; P:RNA-dependent DNA replication; F:endonuclease activity; F:RNA-directed DNA polymerase activity	2	2	0.0271087	7.68611	0.263645	0.799576	1	-8.72421
0	3496090_1	lysyl-trna synthetase	4.55e-59	C:cytoplasm; P:auxin biosynthetic process; F:nucleic acid binding; F:lysine-tRNA ligase activity; P:lysyl-tRNA aminoacylation; F:ATP binding; F:magnesium ion binding	2	2	1.7481	8.02277	20.8548	1.3136e-07	1.15065e-05	7.85816
0	3496100_1	ribosomal protein l3	1.81e-176	P:mitotic spindle elongation; F:structural constituent of ribosome; C:cytosolic large ribosomal subunit; P:translation	2	2	4.45915	12.6518	55.6524	1.33405e-10	9.00558e-08	15.3762
0	3496102_1	nipa-like domain containing 2	5.92e-21	0	2	2	-0.0166747	6.71684	-0.294633	0.776742	1	-8.71445
0	3496104_2	cytochrome c oxidase assembly protein cox19	6.5e-18	C:cytoplasm	2	2	-0.0402416	7.00479	-0.777759	0.461953	1	-8.43249
0	3496107_2	zcrb1 protein	3.68e-07	P:RNA splicing; C:spliceosomal complex; F:RNA binding; P:mRNA processing; F:zinc ion binding; F:nucleotide binding	2	2	-0.0966744	7.14162	-2.22861	0.0607432	1	-6.61744
0	3496109_4	cuticular protein analogous to peritrophins 3-a1	1.17e-39	C:extracellular region; F:chitin binding; P:chitin metabolic process	2	2	0.114351	6.82113	2.27433	0.0567662	0.954891	-6.54905
0	3496125_1	snurportin 1	4.16e-51	C:protein complex; P:mRNA processing; C:cytoplasm; C:nucleus	2	2	0.372153	9.31412	5.67633	0.000728872	0.0174572	-1.84899
0	3496126_1	dna-directed rna polymerase iii subunit rpc5	3.48e-42	F:F; P:response to virus; F:DNA-directed RNA polymerase activity; P:transcription; P:P; P:innate immune response; C:nucleus; C:C	2	2	0.0190423	10.7277	0.18476	0.858608	1	-8.74425
0	3496128_1	coiled-coil domain-containing protein 94	2.4e-63	F:F; P:P; C:C	2	2	-0.953667	8.27116	-6.68701	0.000269423	0.00719676	-0.736928
0	3496129_1	arginine trna protein transferase	3.66e-33	F:transferase activity	2	2	0.0248396	6.80194	0.365905	0.725145	1	-8.688
0	3496129_2	arginyltransferase 1	5.12e-61	C:cytoplasm; F:arginyltransferase activity; P:protein arginylation; C:nucleus	2	2	1.58592	8.20718	19.5297	2.07431e-07	1.6516e-05	7.34486
0	3496133_1	cg4806 cg4806-pa	6.82e-18	F:nucleic acid binding; F:nucleotide binding	2	2	-2.36212	11.2497	-52.5097	2.00988e-10	1.13476e-07	14.9507
0	3496133_2	rna binding motif protein 28	4.97e-58	P:mRNA processing; P:RNA splicing; F:nucleic acid binding; F:nucleotide binding; F:F; F:RNA binding; C:C; C:spliceosomal complex; P:P	2	2	-2.59058	11.9317	-41.4276	1.06789e-09	3.44609e-07	13.1771
0	3496133_3	rna binding motif protein 28	8.21e-15	P:mRNA processing; P:RNA splicing; F:nucleic acid binding; F:nucleotide binding; F:F; F:RNA binding; C:C; C:spliceosomal complex; P:P	2	2	-0.0578761	7.28305	-0.990372	0.354685	1	-8.23959
0	3496137_5	ubiquitin specific proteinase	1.69e-16	P:cellular process	2	2	0.041396	7.01768	0.876526	0.409551	1	-8.34751
0	3496140_1	thioredoxin (agap009584-pa)	9.02e-12	P:cell redox homeostasis; F:electron carrier activity; F:protein disulfide oxidoreductase activity; P:glycerol ether metabolic process	1	1	-0.179245	11.3258	-2.40131	0.0470504	0.8072	-6.35808
0	3496141_4	arginine kinase	0	F:ATP binding; F:arginine kinase activity	2	2	0.309525	14.1329	2.66156	0.0321151	0.571001	-5.96406
0	3496143_2	early gene at 23 cg3327- partial	4.04e-16	F:RNA binding; P:RNA-dependent DNA replication; F:RNA-directed DNA polymerase activity	2	2	-0.25571	7.34564	-4.10907	0.00443066	0.0915998	-3.84289
0	3496144_2	histone deacetylase complex subunit sap18	8.53e-13	C:precatalytic spliceosome; P:negative regulation of gene-specific transcription; P:negative regulation of transcription from RNA polymerase II promoter; P:chromatin silencing; F:transcription corepressor activity; P:nuclear mRNA splicing, via spliceosome; C:catalytic step 2 spliceosome; C:Sin3 complex	2	2	0.0536264	6.55243	1.2675	0.245145	1	-7.93766
0	3496145_3	pa domain-containing protein	3.51e-40	P:muscle cell fate determination	2	2	-0.632629	8.11997	-10.5083	1.44269e-05	0.000563864	2.55852
0	3496146_1	wd repeat domain isoform cra_a	9.42e-76	C:telomerase holoenzyme complex; P:positive regulation of telomerase activity; C:Cajal body; F:RNA binding; F:protein binding; P:telomere formation via telomerase	2	2	-0.534325	7.69364	-4.64479	0.0022986	0.0499317	-3.12233
0	3496155_1	regulatory factor x-associated ankyrin-containing	8.06e-39	F:DNA binding	2	2	-0.327429	6.94945	-4.75827	0.00201116	0.044151	-2.97494
0	3496163_3	splicing factor 3a subunit 2	1.42e-101	F:nucleic acid binding; C:spliceosomal complex; C:small nuclear ribonucleoprotein complex; F:zinc ion binding; P:nuclear mRNA 3'-splice site recognition	2	2	0.145846	7.03431	3.59133	0.00870216	0.170434	-4.57666
0	3496164_1	transposase	1.06e-42	P:DNA metabolic process; P:transcription, DNA-dependent; F:transcription regulator activity; F:DNA binding	2	2	0.100849	6.68012	1.52416	0.170896	1	-7.61762
0	3496169_3	ornithine decarboxylase antizyme	3.95e-32	F:ornithine decarboxylase inhibitor activity; P:polyamine metabolic process; F:protein binding	2	2	0.486193	7.20271	6.01735	0.00051408	0.0128169	-1.45964
0	3496171_2	hypothetical conserved secreted protein	8.01e-07	0	2	2	1.17941	7.9289	20.0895	1.70416e-07	1.42637e-05	7.5658
0	3496172_6	#NAME?	9.82e-39	P:cellular process; C:mitochondrial matrix; F:unfolded protein binding	1	1	-0.310537	10.0385	-4.34516	0.00330051	0.0698391	-3.52032
0	3496172_7	oligopeptidase a	1.4e-41	F:catalytic activity	2	2	0.0687005	7.92435	1.37673	0.210632	1	-7.80558
0	3496172_8	oligopeptidase a	5.27e-16	F:hydrolase activity	2	2	-0.0229395	6.89839	-0.456046	0.662042	1	-8.64672
0	3496176_2	fructose- -bisphosphatase	1.08e-104	C:cytosol; P:cellular response to insulin stimulus; F:monosaccharide binding; C:soluble fraction; F:metal ion binding; F:fructose 1,6-bisphosphate 1-phosphatase activity; F:fructose-2,6-bisphosphate 2-phosphatase activity; F:identical protein binding; P:fructose 6-phosphate metabolic process; P:gluconeogenesis	2	2	2.15077	9.12038	24.7108	4.01897e-08	4.44125e-06	9.18446
0	3496182_1	eukaryotic translation initiation factor 3 subunit	4.12e-101	C:eukaryotic translation initiation factor 3 complex; P:translational initiation; F:translation initiation factor activity	2	2	3.15715	10.5187	33.9518	4.33024e-09	9.27342e-07	11.6534
0	3496183_2	gcn5-related n-acetyltransferase	3.46e-24	F:transferase activity; F:transcription factor activity; F:DNA binding; F:N-acetyltransferase activity; P:regulation of transcription, DNA-dependent; C:intracellular; P:metabolic process; P:transcription; P:regulation of transcription	2	2	-0.053385	7.06182	-1.064	0.322332	1	-8.16451
0	3496185_1	3-oxoacyl-acyl-carrier-protein reductase	1.2e-76	F:catalytic activity; P:metabolic process	2	2	0.0469244	6.77997	0.866495	0.41467	1	-8.35652
0	3496185_2	3-oxoacyl-acyl-carrier-protein reductase	3.16e-80	F:catalytic activity; P:metabolic process	1	1	-0.413506	7.9861	-1.06959	0.319972	1	-8.15864
0	3496186_1	novel protein	1.33e-24	0	2	2	-0.0160633	6.3819	-0.36742	0.724063	1	-8.68737
0	3496191_3	integrin beta-1-binding	1.73e-70	F:metal ion binding; P:integrin-mediated signaling pathway; F:zinc ion binding	2	2	-0.00407655	6.56039	-0.0914305	0.929689	1	-8.75891
0	3496192_1	nucleolar protein 16	4.93e-10	C:nucleus; C:nucleolus	2	2	2.10182	11.0593	31.7719	6.90206e-09	1.25451e-06	11.1405
0	3496193_4	innexin isoform a	2.68e-15	P:response to stimulus; P:multicellular organismal process	2	2	-0.559414	13.1511	-13.6208	2.49296e-06	0.000125976	4.54151
0	3496198_1	y-linked zinc finger protein	1.11e-12	F:binding	2	2	0.0602748	8.31289	0.755087	0.474607	1	-8.4508
0	3496199_1	ribonuclease large subunit	1.49e-89	F:endonuclease activity; F:nucleic acid binding	2	2	0.104275	9.89113	1.94445	0.0925358	1	-7.03572
0	3496202_1	ribosomal protein l23	3.51e-54	C:nucleolus; C:cytosolic ribosome; F:structural constituent of ribosome; F:protein binding; C:cytosol; P:ribosomal protein import into nucleus; P:translational elongation	2	2	0.746324	10.8741	13.5213	2.62098e-06	0.000131059	4.48495
0	3496203_2	novel protein	3.75e-07	0	2	2	-0.45186	6.99622	-7.37899	0.000145229	0.00411847	-0.0435779
0	3496207_1	cg31716- isoform partial	7.69e-104	C:cytoplasm; F:ligase activity; P:regulation of transcription; F:RNA binding; F:protein binding; C:nucleus; F:zinc ion binding; F:nucleotide binding	2	2	-0.123747	7.28386	-1.95479	0.091132	1	-7.02076
0	3496213_3	nuclear transcription factor beta	3.23e-44	F:transcription repressor binding; C:CCAAT-binding factor complex; F:transcription factor activity; P:positive regulation of transcription, DNA-dependent	2	2	-0.328902	7.35539	-6.23128	0.000415911	0.0105948	-1.22289
0	3496214_1	novel protein	1.71e-11	0	2	2	-1.83842	11.9017	-21.3063	1.13149e-07	1.01842e-05	8.02566
0	3496220_1	40s ribosomal protein s20	3.91e-45	F:structural constituent of ribosome; F:RNA binding; F:protein binding; C:cytosolic small ribosomal subunit; P:translational elongation	2	2	2.85004	11.5791	72.689	2.02711e-11	2.67859e-08	17.2648
0	3496226_2	kelch domain containing 3	2.62e-65	F:protein binding	2	2	2.42396	8.77546	49.5822	3.01159e-10	1.43873e-07	14.5268
0	3496234_4	dead box atp-dependent rna helicase	4.34e-115	F:translation initiation factor activity; C:eukaryotic translation initiation factor 4F complex; C:cytosol; F:RNA binding; P:auxin biosynthetic process; P:response to protein stimulus; F:ATP-dependent helicase activity; F:ATP binding; F:protein binding; P:regulation of translational initiation; P:interspecies interaction between organisms	2	2	0.549737	8.34483	9.60732	2.61952e-05	0.000945294	1.88526
0	3496237_4	mediator complex subunit 11 cg6884-pa	2.84e-11	P:cellular process; P:system development; C:nucleus	2	2	-0.404522	10.1544	-6.013	0.00051633	0.0128627	-1.46451
0	3496240_1	cathepsin c	1.89e-143	F:peptidase activity; C:lysosome; P:immune response	2	2	0.490083	6.99341	2.76766	0.0275276	0.493676	-5.80321
0	3496243_1	methyltransferase-like protein 5	2.21e-76	F:rRNA methyltransferase activity; P:cellular metabolic process	2	2	0.629709	9.9266	8.2369	7.17648e-05	0.00223518	0.749249
0	3496248_1	pterin-4-alpha-carbinolamine dehydratase	1.05e-27	P:protein heterooligomerization; C:mitochondrion; P:tetrahydrobiopterin biosynthetic process; F:protein binding; F:4-alpha-hydroxytetrahydrobiopterin dehydratase activity; P:protein homotetramerization; F:phenylalanine 4-monooxygenase activity	1	1	1.64826	10.3957	27.8567	1.73659e-08	2.43455e-06	10.1191
0	3496250_4	vacuolar atpase m9	2.52e-26	F:hydrogen ion transmembrane transporter activity; P:ATP synthesis coupled proton transport; C:proton-transporting V-type ATPase, V0 domain; P:ATP hydrolysis coupled proton transport	2	2	-0.344036	6.84641	-4.40765	0.00305729	0.0651786	-3.43626
0	3496253_1	senescence-associated protein	4.77e-12	F:transcription factor binding; F:transcription factor activity; P:rRNA transcription; P:cell proliferation	2	2	0.159012	14.8497	3.51039	0.00970541	0.188537	-4.6944
0	3496258_1	ribosomal protein s7	5.31e-56	C:mitochondrial small ribosomal subunit; F:SUMO binding; F:structural constituent of ribosome; C:lipid particle; F:RNA binding; C:cytosolic small ribosomal subunit; P:translation	1	1	2.80563	10.5635	24.4194	4.36667e-08	4.7246e-06	9.09178
0	3496264_5	isoform b	4.81e-46	P:olfactory behavior; P:inter-male aggressive behavior; C:lipid particle	2	2	1.04746	7.54101	17.4006	4.62041e-07	3.15677e-05	6.44338
0	3496267_2	ribonucleotide reductase m1	9.68e-119	F:class I ribonucleotide reductase activity; P:deoxyribonucleotide biosynthetic process; P:oxidation reduction; P:DNA replication; P:protein heterotetramerization; F:ATP binding; F:protein binding; C:ribonucleoside-diphosphate reductase complex; P:activation of caspase activity	2	2	0.102835	6.96744	1.96986	0.0891231	1	-6.99891
0	3496267_4	ribonucleoside-diphosphate reductase m1 chain	9e-122	C:ribonucleoside-diphosphate reductase complex; P:deoxyribonucleotide biosynthetic process; P:DNA replication; F:class I ribonucleotide reductase activity; F:protein binding; P:oxidation reduction; P:protein heterotetramerization; F:ATP binding	2	2	0.115893	6.91143	2.47876	0.0419759	0.728726	-6.24106
0	3496277_2	zinc finger	7.64e-09	C:protein complex; F:metal ion binding; F:protein complex binding; C:chromatin; F:transcription factor activity; P:negative regulation of transcription; P:negative regulation of neuron differentiation	2	2	0.0313579	6.60818	0.650889	0.535702	1	-8.5289
0	3496278_4	glutathione-s-transferase gst	8.58e-54	F:transferase activity; F:glutathione transferase activity; C:C	2	2	-0.0538386	8.20662	-1.18112	0.275778	1	-8.03721
0	3496281_1	peptidyl-prolyl cis-trans isomerase	2.03e-60	F:binding; P:protein folding; C:membrane fraction; F:peptidyl-prolyl cis-trans isomerase activity; P:biological regulation; C:mitochondrial part	2	2	-0.0229924	11.4004	-0.556217	0.595229	1	-8.5909
0	3496282_1	aspartate aminotransferase	3e-175	F:L-aspartate:2-oxoglutarate aminotransferase activity; P:oxaloacetate metabolic process; P:aspartate biosynthetic process; P:aspartate catabolic process; C:mitochondrial matrix; P:response to ethanol; F:amino acid binding; C:mitochondrial inner membrane; F:phospholipid binding; P:glutamate biosynthetic process; C:cell surface; F:pyridoxal phosphate binding; C:protein complex; P:neurotransmitter …	2	2	-2.60364	13.0285	-40.5844	1.23424e-09	3.83261e-07	13.0209
0	3496290_1	chaperonin containing subunit 2	1.31e-66	P:auxin biosynthetic process; P:protein folding; C:chaperonin-containing T-complex; F:ATP binding; F:unfolded protein binding; C:nucleus	2	2	-0.112293	13.0827	-2.42364	0.0455264	0.783169	-6.32439
0	3496290_2	isoform a	5.95e-99	P:auxin biosynthetic process; P:protein folding; C:chaperonin-containing T-complex; C:lipid particle; P:mitotic spindle organization; F:ATP binding; F:unfolded protein binding	2	2	0.806715	9.03314	6.34802	0.000371318	0.00959198	-1.09606
0	3496294_1	hypothetical protein TcasGA2_TC014998 [Tribolium castaneum]	1.01e-05	F:fructose-bisphosphate aldolase activity; P:metabolic process; F:catalytic activity; P:glycolysis; F:lyase activity	2	2	4.49844	9.90991	30.6559	8.87163e-09	1.51881e-06	10.8634
0	3496298_1	muscle lim protein at 84b	3.65e-26	C:cytoplasm; C:nucleus; F:zinc ion binding; F:protein binding	2	2	-0.0662575	6.86814	-1.13316	0.294127	1	-8.09046
0	3496299_2	zinc finger 1	7.69e-52	F:binding; C:intracellular membrane-bounded organelle; P:regulation of biological process; P:growth	2	2	-0.595721	7.91831	-8.64263	5.25089e-05	0.00170826	1.10113
0	3496305_1	cement precursor protein 3b variant 1	1.21e-06	0	2	2	-0.699838	7.63574	-5.97029	0.000539001	0.0133685	-1.51248
0	3496307_1	coiled-coil domain containing 44	4.41e-37	F:catalytic activity	2	2	-0.984077	9.9158	-21.2508	1.15224e-07	1.0341e-05	8.00527
0	3496310_1	vacuolar protein sorting-associated protein 28 homolog	1.51e-72	0	2	2	-0.379076	7.13182	-8.99827	4.03339e-05	0.00137373	1.39845
0	3496310_2	vacuolar protein sorting-associated protein 28 homolog	1.49e-78	C:endosome; P:negative regulation of protein ubiquitination; F:protein binding; P:transport; C:membrane; C:cytosol	2	2	-0.0978323	7.88444	-1.56357	0.161494	1	-7.56569
0	3496313_1	ribophorin i	1.8e-70	F:transferase activity, transferring glycosyl groups; C:cell part	2	2	0.437083	8.00883	4.48274	0.00279077	0.0598689	-3.33598
0	3496315_1	mago-nashi proliferation-associated	7.38e-79	C:exon-exon junction complex; F:RNA binding; C:spliceosomal complex; P:regulation of translation; C:nuclear speck; P:RNA splicing; P:female gamete generation; F:protein binding; P:mRNA processing; C:cytoplasm; P:nuclear-transcribed mRNA catabolic process, nonsense-mediated decay; P:mRNA transport	2	2	0.593608	10.7757	11.1113	9.92344e-06	0.000407064	2.98109
0	3496323_3	wd-repeat protein	1.19e-29	F:F; F:acyltransferase activity; F:transferase activity; P:transcription; F:histone acetyltransferase activity; P:P; C:nucleus	2	2	1.92016	10.2762	31.9802	6.59241e-09	1.22215e-06	11.1911
0	3496325_4	pol-like protein	1.6e-06	F:nucleic acid binding; F:RNA binding; F:ribonuclease H activity; P:RNA-dependent DNA replication; F:zinc ion binding; F:RNA-directed DNA polymerase activity	2	2	0.032477	6.54776	0.663328	0.52816	1	-8.52011
0	3496329_1	mitochondrial ribosomal protein l38	2.43e-80	F:structural constituent of ribosome; P:translation; C:mitochondrial large ribosomal subunit; C:ribosome	2	2	-0.43042	11.035	-7.66517	0.000113986	0.00335183	0.228668
0	3496331_2	peroxisomal -enoyl- isomerase	4.8e-29	P:fatty acid metabolic process; F:catalytic activity; C:mitochondrion	1	1	-0.0608036	7.21	-0.595208	0.570267	1	-8.56643
0	3496331_4	peroxisomal -enoyl- isomerase	8.38e-108	F:binding; P:fatty acid metabolic process; F:isomerase activity; C:mitochondrion	2	2	-1.05906	11.902	-27.7402	1.78838e-08	2.4705e-06	10.0865
0	3496332_1	zinc finger hit domain-containing protein 3	1.71e-08	F:F; F:zinc ion binding; C:intracellular; C:C	1	1	-0.00162342	7.73057	-0.0320927	0.975286	1	-8.76309
0	3496332_2	zinc finger hit domain-containing protein 3	7.63e-11	P:regulation of transcription, DNA-dependent; F:metal ion binding; F:thyroid hormone receptor binding; F:F; P:P; C:C; C:intracellular	2	2	-0.549173	7.50553	-3.90841	0.00572817	0.115728	-4.12309
0	3496332_3	AT23078p [Drosophila melanogaster]	0.000131	0	1	1	-1.19081	11.1738	-27.7364	1.79007e-08	2.4705e-06	10.0854
0	3496336_1	mrna capping enzyme	1.5e-50	P:cellular macromolecule metabolic process; F:phosphatase activity; P:primary metabolic process	2	2	0.976907	7.56371	13.9515	2.11565e-06	0.000110414	4.72684
0	3496340_1	heterogeneous nuclear ribonucleoprotein u-like protein 1 isoform 5	5.28e-124	P:RNA splicing; C:heterogeneous nuclear ribonucleoprotein complex; F:protein binding; P:response to virus	2	2	0.15081	7.03063	2.43813	0.0445638	0.768573	-6.30249
0	3496344_1	pre-mrna-splicing factor clf-	4.6e-58	C:intracellular; P:regulation of alternative nuclear mRNA splicing, via spliceosome	2	2	0.290767	11.4838	3.90908	0.00572319	0.115665	-4.12214
0	3496345_1	40s ribosomal protein s10	9.03e-38	C:ribosome	2	2	3.11467	11.4792	35.5986	3.10391e-09	7.44695e-07	12.0182
0	3496346_1	eukaryotic translation initiation factor 3 subunit c	1.48e-151	C:cytosol; C:eukaryotic translation initiation factor 3 complex; F:protein binding; P:translational initiation; F:translation initiation factor activity	2	2	2.65964	9.03844	46.3116	4.87125e-10	2.05802e-07	14.0178
0	3496350_1	protein	1.22e-19	F:kinase activity; F:F; F:acyltransferase activity; F:transferase activity; F:zinc ion binding; P:P; F:protein-glutamine gamma-glutamyltransferase activity; C:intracellular	2	2	2.61511	8.73057	51.7704	2.22119e-10	1.17904e-07	14.8463
0	3496353_1	ubiquitin protein ligase e3 component n-recognin 4	0	F:protein binding; C:intracellular part	2	2	-0.652956	11.3189	-16.1865	7.61732e-07	4.74021e-05	5.87978
0	3496356_1	u2-associated sr140 protein	4.43e-92	F:nucleic acid binding	2	2	-0.164799	10.7871	-2.86656	0.0238672	0.434556	-5.65349
0	3496358_2	ribose-phosphate pyrophosphokinase	2.39e-148	F:kinase activity; P:ribonucleoside monophosphate biosynthetic process; F:ribose phosphate diphosphokinase activity; F:magnesium ion binding; P:nucleoside metabolic process	2	2	-0.221808	7.8815	-3.18661	0.0151568	0.284867	-5.17243
0	3496362_1	mitochondrial import inner membrane translocase subunit tim44	1.22e-24	P:intracellular protein transport; C:mitochondrial inner membrane presequence translocase complex; F:P-P-bond-hydrolysis-driven protein transmembrane transporter activity	2	2	-0.493593	8.94968	-5.27467	0.00112054	0.0257078	-2.32729
0	3496363_2	cuticular	1.9e-17	F:chitin binding; P:chitin metabolic process; C:extracellular region	2	2	0.108463	6.70301	2.11462	0.0719249	1	-6.78683
0	3496364_1	ribosomal protein l15	3.24e-76	F:structural constituent of ribosome; C:cytosolic large ribosomal subunit; P:translation	2	2	2.60035	12.9444	33.1711	5.09915e-09	1.03491e-06	11.4739
0	3496368_1	heat shock protein 14	2.87e-10	F:ATP binding; P:response to stress; F:nucleotide binding; P:auxin biosynthetic process	2	2	-0.0475479	11.9519	-1.12969	0.295493	1	-8.09425
0	3496368_2	heat shock 70kda protein 14	4.68e-43	F:ATP binding; P:response to stress; F:nucleotide binding; P:auxin biosynthetic process	2	2	0.695782	8.36918	9.0101	3.99876e-05	0.00136602	1.40818
0	3496372_1	clathrin-associated protein	0	C:cytosol; C:secretory granule; C:coated vesicle; C:clathrin coat of coated pit; P:synaptic vesicle coating; C:mitochondrion; F:lipid binding; C:clathrin adaptor complex; C:peroxisomal membrane; C:endocytic vesicle membrane; P:regulation of defense response to virus by virus; P:neurotransmitter secretion; F:protein binding; F:transporter activity; P:intracellular protein transport; P:dsRNA transp…	2	2	-0.103445	7.34243	-2.35288	0.0505389	0.861337	-6.43107
0	3496373_4	nadh dehydrogenase-ubiquinone fe-s protein 2 precursor	5.93e-102	P:mitochondrial electron transport, NADH to ubiquinone; F:NAD or NADH binding; F:quinone binding; C:mitochondrial respiratory chain complex I; F:NADH dehydrogenase activity	2	2	-0.454999	8.84822	-3.72044	0.00732652	0.145372	-4.39045
0	3496379_1	transposase homolog	1.98e-14	P:cellular macromolecule metabolic process; P:nucleic acid metabolic process	2	2	1.53582	7.66507	23.9833	4.95294e-08	5.22245e-06	8.95099
0	3496382_1	acid phosphatase lysosomal	1.23e-51	F:phosphatase activity; P:multicellular organismal process; C:lysosome; P:cellular process	2	2	2.47812	8.72165	12.8811	3.64882e-06	0.000172243	4.11124
0	3496387_2	hsp70 binding protein	3.83e-33	P:cellular protein metabolic process	2	2	-0.987053	7.97604	-7.9255	9.2019e-05	0.00278637	0.469446
0	3496391_1	60s ribosomal export protein nmd3	3.21e-28	P:transport; C:nucleus	2	2	0.642753	11.3091	9.41658	2.99082e-05	0.0010614	1.73571
0	3496391_2	60s ribosomal export protein nmd3	3.06e-71	P:transport; C:nuclear lumen	2	2	0.712448	7.83356	12.1578	5.40343e-06	0.000240559	3.66771
0	3496392_1	isoform a	1.64e-70	0	2	2	-0.042021	8.31062	-0.584662	0.576958	1	-8.5732
0	3496395_3	dead box atp-dependent rna	4.94e-37	F:binding; F:ATP-dependent helicase activity	2	2	-0.836553	10.5833	-15.5923	9.85792e-07	5.77027e-05	5.5889
0	3496399_1	hypothetical protein Phum_PHUM431290 [Pediculus humanus corporis]	1.11e-10	0	2	2	-1.24447	7.41205	-6.63731	0.000282177	0.0075084	-0.788748
0	3496399_2	hypothetical protein Phum_PHUM431290 [Pediculus humanus corporis]	2.64e-11	0	2	2	-2.01725	8.31755	-36.702	2.50426e-09	6.50741e-07	12.2527
0	3496399_3	isoform b	2.03e-06	F:GTPase activator activity; P:regulation of small GTPase mediated signal transduction; P:signal transduction; C:intracellular	2	2	-0.0596323	6.61835	-1.34142	0.221292	1	-7.84899
0	3496404_1	eyes absent 3	1.48e-07	P:multicellular organismal development; F:catalytic activity; P:metabolic process	2	2	0.0333111	6.47832	0.654624	0.533431	1	-8.52628
0	3496404_2	lsm4 u6 small nuclear rna associated ( cerevisiae)	7.39e-42	C:cytoplasm; P:RNA splicing; C:U6 snRNP; C:nucleoplasm; C:spliceosomal complex; F:RNA binding; F:protein binding; P:mRNA processing	2	2	-0.789626	11.131	-5.55703	0.00082638	0.0194845	-1.98879
0	3496406_3	mitochondrial ribosomal	1.64e-17	C:intracellular	2	2	-0.340698	7.76379	-4.83745	0.00183418	0.0404804	-2.87319
0	3496406_4	mitochondrial ribosomal	2.82e-17	C:intracellular	2	2	-1.22925	10.0067	-12.3851	4.76531e-06	0.000216021	3.80968
0	3496413_2	protein	2.96e-11	F:binding; F:scavenger receptor activity; P:cell adhesion; C:membrane; F:sugar binding	2	2	0.130621	6.96495	2.88572	0.0232195	0.424007	-5.62453
0	3496417_1	endonuclease reverse transcriptase	4.35e-13	F:RNA binding; P:RNA-dependent DNA replication; F:endonuclease activity; F:RNA-directed DNA polymerase activity	2	2	0.573792	7.01455	9.67037	2.5085e-05	0.000911053	1.93412
0	3496421_1	cop9 signalosome complex subunit 8	1.98e-28	F:protein binding; C:signalosome	2	2	-1.01707	8.3822	-14.6094	1.5426e-06	8.44824e-05	5.08352
0	3496422_1	spliceosome associated protein	1.25e-12	C:spliceosomal complex; F:protein binding; P:nuclear mRNA splicing, via spliceosome	2	2	-0.145573	8.27652	-3.01336	0.0193502	0.357661	-5.43203
0	3496422_2	splicing factor 3b	2.2e-75	C:spliceosomal complex; F:protein binding; P:nuclear mRNA splicing, via spliceosome	2	2	-0.561138	7.78352	-7.9595	8.95202e-05	0.00272398	0.500422
0	3496423_1	thump domain containing 1	1.08e-25	F:F; P:P	2	2	-2.40613	8.32106	-19.2656	2.28019e-07	1.79482e-05	7.23845
0	3496424_1	vacuolar protein-sorting-associated protein 25	2.81e-46	C:mitochondrion	2	2	-0.976087	7.79032	-13.067	3.30941e-06	0.000158908	4.22152
0	3496425_1	myosin light chain 2	1.02e-29	C:myosin complex; F:motor activity	2	2	0.0788635	6.68514	1.37889	0.209994	1	-7.8029
0	3496426_1	peter pan homolog	2.56e-42	P:phosphate transport; C:membrane; F:sodium-dependent phosphate transmembrane transporter activity	2	2	0.595486	10.8743	6.91859	0.000217926	0.00594129	-0.499132
0	3496429_1	loc556764 protein	3.21e-88	P:auxin biosynthetic process; F:RNA helicase activity; F:ATP-dependent helicase activity; F:RNA binding; F:RNA-dependent ATPase activity; F:ATP binding; C:nucleus; P:RNA processing	2	2	-0.0908468	13.1278	-2.29516	0.0550425	0.928916	-6.51782
0	3496429_2	atp-dependent rna	7.56e-57	C:polytene chromosome puff; F:mRNA binding; F:ATP-dependent RNA helicase activity; C:precatalytic spliceosome; P:regulation of alternative nuclear mRNA splicing, via spliceosome; F:protein binding; P:antimicrobial humoral response; F:nucleotide binding; C:catalytic step 2 spliceosome; P:RNA interference	2	2	1.77907	9.75261	10.4033	1.54286e-05	0.00059775	2.48273
0	3496431_2	cg10174 protein	7.8e-34	P:positive regulation of antimicrobial peptide biosynthetic process; C:intracellular; P:protein import into nucleus; F:protein transmembrane transporter activity	2	2	0.465575	8.06166	8.97092	4.11472e-05	0.00139566	1.37595
0	3496432_2	zgc:136346 protein	3.16e-14	F:nucleic acid binding; F:F; P:P	2	2	-0.236994	10.6873	-5.54735	0.000834909	0.0196648	-2.00022
0	3496433_2	tis11 isoform b	4.15e-25	P:cellular process; P:posttranscriptional regulation of gene expression; F:binding	2	2	-2.23601	8.63622	-16.9616	5.51391e-07	3.65856e-05	6.24415
0	3496436_3	ribosomal protein l7a	1.06e-08	C:membrane fraction; C:polysomal ribosome; F:structural constituent of ribosome; F:RNA binding; C:cytosolic large ribosomal subunit; P:translational elongation	1	1	0.490515	6.85685	6.95812	0.000210292	0.00576099	-0.459136
0	3496437_1	cg9383-pa	1.5e-68	P:regulation of nuclear mRNA splicing, via spliceosome; P:regulation of cell cycle; P:muscle organ development; F:protein binding; P:nucleosome assembly; C:RCAF complex; P:dendrite morphogenesis; C:chromatin assembly complex	2	2	-0.667652	9.86263	-16.638	6.29935e-07	4.0541e-05	6.09402
0	3496446_1	nucleoporin nup53	1.4e-28	C:nuclear envelope; P:transport	2	2	-0.709104	9.70471	-6.92358	0.000216944	0.00591713	-0.494069
0	3496449_1	mitochondrial cytochrome c oxidase subunit 6a isoform 1	1.14e-10	F:cytochrome-c oxidase activity; P:determination of adult lifespan; C:mitochondrial inner membrane; F:enzyme regulator activity; C:microsome; C:lipid particle; P:mitochondrial electron transport, cytochrome c to oxygen	2	2	0.691667	11.3343	12.4249	4.66266e-06	0.000212298	3.83427
0	3496451_1	plasma membrane calcium-transporting atpase 3 (plasma membrane calcium pump isoform 3) (plasma membrane calcium atpase isoform 3)	9.17e-102	F:calcium-transporting ATPase activity; P:auxin biosynthetic process; C:integral to membrane; P:ATP biosynthetic process; F:ATP binding; P:calcium ion transport	2	2	0.0103786	6.62925	0.229927	0.824663	1	-8.73363
0	3496453_2	salivary proline-rich protein	1.36e-05	C:integral to membrane; F:small GTPase regulator activity; C:actin cytoskeleton; F:F; C:extracellular region; C:C; P:protein complex assembly; F:protein binding; P:actin polymerization or depolymerization; P:P	2	2	0.127311	6.98311	2.99957	0.0197333	0.364418	-5.45279
0	3496456_1	protein	9.38e-34	0	2	2	1.32723	7.32694	10.6014	1.36005e-05	0.000536103	2.62512
0	3496458_1	mitochondrial gtpase 1 precursor	1.57e-33	C:mitochondrion	2	2	-0.787538	8.98506	-16.3559	7.08904e-07	4.45161e-05	5.96084
0	3496463_1	glutamine synthetase 2 (glutamate-amonia ligase)	0	P:neurotransmitter receptor metabolic process; P:synapse assembly; P:glutamine biosynthetic process; F:ATP binding; F:glutamate-ammonia ligase activity; P:glutamate catabolic process; C:cytoplasm	2	2	2.58389	8.41039	32.1862	6.30173e-09	1.17977e-06	11.2408
0	3496467_1	atp synthase f0 subunit 6	6.63e-83	F:hydrogen ion transmembrane transporter activity; C:mitochondrial inner membrane; P:ATP synthesis coupled proton transport; C:proton-transporting ATP synthase complex, coupling factor F(o)	2	2	-0.262286	14.8968	-2.38122	0.0484671	0.829213	-6.38839
0	3496468_1	nadh dehydrogenase	3.09e-23	C:mitochondrion; F:F; P:mitochondrial respiratory chain complex I assembly; P:P; F:calmodulin binding; C:mitochondrial membrane	2	2	-0.701336	7.93193	-9.46322	2.89481e-05	0.00103086	1.77252
0	3496470_3	splicing factor subunit 4	7.74e-111	F:nucleic acid binding; F:nucleotide binding	2	2	0.0684489	6.47172	1.19091	0.272151	1	-8.02616
0	3496473_2	selenoprotein w	1.03e-17	C:cytoplasm; P:response to selenium ion; F:oxidoreductase activity; C:plasma membrane	2	2	0.179536	7.13283	4.1055	0.00445067	0.0919828	-3.84781
0	3496481_1	cathepsin l	1.38e-67	F:hydrolase activity	2	2	3.30767	9.85928	81.458	9.0723e-12	1.87812e-08	18.0287
0	3496484_1	saps domain member 2	1.06e-49	F:protein binding	2	2	0.0302683	6.74095	0.49962	0.632522	1	-8.6237
0	3496486_1	membrane traffic protein	6.32e-128	P:neurotransmitter secretion	2	2	-0.0508745	7.25815	-1.05687	0.32536	1	-8.17195
0	3496486_2	membrane traffic protein	5.42e-14	F:kinase activity	2	2	-0.0865994	7.76512	-0.990099	0.35481	1	-8.23986
0	3496490_1	replication factor c (activator 1) 38kda	4.49e-147	P:auxin biosynthetic process; P:response to organophosphorus; F:DNA-directed DNA polymerase activity; F:DNA clamp loader activity; P:nucleotide-excision repair, DNA gap filling; P:DNA synthesis involved in DNA repair; F:ATP binding; P:DNA strand elongation involved in DNA replication; F:protein binding; C:DNA polymerase III complex; C:nucleoplasm; C:DNA replication factor C complex	1	1	-0.758321	8.55631	-3.81997	0.00642712	0.12901	-4.24831
0	3496490_2	replication factor c (activator 1) 38kda	1.38e-140	P:auxin biosynthetic process; P:response to organophosphorus; F:DNA-directed DNA polymerase activity; F:DNA clamp loader activity; P:nucleotide-excision repair, DNA gap filling; P:DNA synthesis involved in DNA repair; F:ATP binding; P:DNA strand elongation involved in DNA replication; F:protein binding; C:DNA polymerase III complex; C:nucleoplasm; C:DNA replication factor C complex	1	1	-1.11706	11.0468	-26.6872	2.34542e-08	3.02415e-06	9.78493
0	3496491_2	fgfr1 oncogene partner	5.72e-19	C:cytosol; C:centrosome; P:negative regulation of protein kinase activity; P:positive regulation of cell migration; P:positive regulation of cell growth; F:protein kinase binding; C:perinuclear region of cytoplasm; P:positive regulation of cell proliferation; F:protein homodimerization activity; F:protein tyrosine kinase inhibitor activity; C:nucleus	2	2	-0.11627	7.24564	-2.12148	0.0711972	1	-6.77669
0	3496501_2	cg9380 cg9380-pb	7.63e-09	0	2	2	1.68829	7.61487	24.2783	4.54721e-08	4.88778e-06	9.04651
0	3496505_1	importin beta-3	4.48e-36	P:protein import into nucleus; F:protein transmembrane transporter activity; C:cytosol	2	2	1.11698	11.2763	16.5608	6.50503e-07	4.13586e-05	6.05779
0	3496506_2	cyclin d-type binding-protein 1	1.76e-15	F:binding; P:cell cycle; C:cytoplasm; F:protein binding; C:nucleus	2	2	-0.578239	8.46896	-5.50374	0.000874564	0.0205271	-2.05185
0	3496508_2	iq calmodulin-binding motif domain-containing protein	3.16e-05	F:phosphoprotein phosphatase activity; F:hydrolase activity; F:small GTPase regulator activity; P:cytoskeleton organization; C:actin cytoskeleton; F:actin binding; P:protein complex assembly; F:protein binding; P:actin polymerization or depolymerization; F:binding	2	2	0.0832065	6.71041	1.62896	0.146944	1	-7.47816
0	3496510_2	leptin receptor overlapping transcript-like 1	1.2e-31	P:regulation of metabolic process; P:signaling pathway; P:negative regulation of hydrolase activity; F:protein binding; P:signal transduction; C:extracellular region; F:transmembrane receptor activity; P:cholesterol metabolic process; C:integral to plasma membrane	2	2	-0.227199	7.85013	-5.84076	0.000614857	0.014963	-1.65939
0	3496512_1	prefoldin subunit 6	1.63e-26	P:protein folding; F:chaperone binding; F:unfolded protein binding; C:prefoldin complex; P:chaperone-mediated protein complex assembly	2	2	-1.11598	10.4021	-20.6741	1.3957e-07	1.21424e-05	7.7901
0	3496515_1	transcription factor mitochondrial	6.19e-77	F:rRNA methyltransferase activity; P:cellular macromolecule metabolic process; P:nucleic acid metabolic process; C:mitochondrial nucleoid; P:gene expression	1	1	-1.28065	9.21753	-9.75149	2.3734e-05	0.00086859	1.99659
0	3496523_5	128up	1.12e-176	C:intracellular; F:GTP binding	2	2	0.796071	9.06809	17.5777	4.30749e-07	2.98901e-05	6.5224
0	3496529_1	tsc22 domain member 3	3.52e-20	P:segmentation; P:positive regulation of cell growth; P:negative regulation of Notch signaling pathway; P:compound eye photoreceptor cell differentiation; P:dorsal appendage formation; P:regulation of transcription, DNA-dependent; P:decapentaplegic receptor signaling pathway; P:negative regulation of cell fate specification; P:ovarian follicle cell migration; C:cytoplasm; P:anti-apoptosis; F:RNA …	2	2	3.81531	10.2548	30.3954	9.41925e-09	1.58103e-06	10.7972
0	3496530_4	u3 small nucleolar rna-associated protein 18 homolog	2.43e-34	C:nucleus	2	2	1.90323	8.21299	25.2666	3.43985e-08	3.92837e-06	9.35813
0	3496532_1	ubiquitin-like protein fubi	6.02e-21	P:mitotic spindle elongation; C:lipid particle; C:cytosolic small ribosomal subunit	2	2	3.56853	12.498	87.7526	5.36404e-12	1.82352e-08	18.5114
0	3496536_2	transmembrane and coiled-coil domain-containing protein 1	2.3e-69	C:Golgi membrane; C:integral to membrane; C:endoplasmic reticulum membrane	2	2	0.248115	9.06852	1.9868	0.086918	1	-6.97431
0	3496536_3	transmembrane and coiled-coil domain-containing protein 1	1.52e-68	C:Golgi membrane; C:integral to membrane; C:endoplasmic reticulum membrane	2	2	1.10379	8.58767	12.7444	3.92373e-06	0.000182671	4.02919
0	3496541_1	atp synthase e chain	6.17e-14	C:lipid particle	2	2	0.163407	11.5035	2.09725	0.0738007	1	-6.81248
0	3496543_2	methylmalonate-semialdehyde dehydrogenase	0	P:brown fat cell differentiation; F:acyl-CoA binding; F:thiolester hydrolase activity; C:mitochondrion; P:oxidation reduction; F:methylmalonate-semialdehyde dehydrogenase (acylating) activity; P:beta-alanine catabolic process; P:thymine catabolic process; F:malonate-semialdehyde dehydrogenase (acetylating) activity; P:valine catabolic process	2	2	-0.113106	8.09224	-1.65429	0.141642	1	-7.44381
0	3496546_1	brother of odd with entrails isoform c	1.52e-70	P:wing disc development; F:nucleic acid binding; F:RNA polymerase II transcription factor activity; P:imaginal disc-derived leg joint morphogenesis; C:nucleus; F:zinc ion binding; P:hindgut morphogenesis	2	2	-1.48908	9.55804	-12.7535	3.90455e-06	0.000182051	4.03472
0	3496551_1	armadillo segment polarity	0	P:imaginal disc-derived wing expansion; P:germ-line stem cell division; P:neuroblast development; F:alpha-catenin binding; P:positive regulation of gene-specific transcription from RNA polymerase II promoter; P:ventral furrow formation; P:zonula adherens assembly; C:apical plasma membrane; P:Wnt receptor signaling pathway; P:heart development; P:somatic stem cell maintenance; C:spot adherens junc…	2	2	0.0670461	6.86038	1.42223	0.197565	1	-7.74868
0	3496554_1	mgc80576 protein	1e-18	C:integral to membrane; C:membrane; F:folic acid binding; P:transmembrane transport; F:transporter activity; P:transport	2	2	-0.0408449	6.74885	-0.917361	0.38919	1	-8.30999
0	3496555_6	uncharacterized conserved secreted protein	1.69e-71	0	2	2	0.759524	7.09178	10.8945	1.13282e-05	0.000456842	2.83156
0	3496555_7	protein o-fucosyltransferase 2	1.51e-30	F:transferase activity	2	2	-0.0348143	6.99175	-0.722179	0.493385	1	-8.47655
0	3496556_2	tubulin beta-2c chain	4.95e-138	P:microtubule-based movement; F:GTP binding; P:protein polymerization; F:structural molecule activity; F:GTPase activity; C:microtubule	2	2	0.382794	7.81273	4.70496	0.00214092	0.0467352	-3.04395
0	3496563_4	actinin-like protein	4.94e-07	F:hydrolase activity, hydrolyzing O-glycosyl compounds; F:calcium ion binding; F:carbohydrate binding; P:carbohydrate metabolic process; C:extracellular region	2	2	5.39313	9.57133	85.838	6.26807e-12	1.82352e-08	18.3698
0	3496564_1	heat shock protein 70	4.72e-142	F:ATP binding; P:response to stress; P:auxin biosynthetic process	2	2	2.08762	9.6149	42.7467	8.56394e-10	2.9713e-07	13.4146
0	3496565_1	n-acetyltransferase 12	1.24e-20	P:metabolic process; F:peptide alpha-N-acetyltransferase activity	2	2	-0.551507	9.62689	-7.25848	0.000161187	0.00452349	-0.160669
0	3496573_1	hemocyanin subunit 1	3.21e-163	C:extracellular region; P:metabolic process; F:oxygen transporter activity; F:oxidoreductase activity; P:transport	2	2	-0.492232	7.18513	-8.30875	6.78391e-05	0.0021354	0.812592
0	3496573_2	a chain crystal structure of hexameric haemocyanin from panulirus interruptus refined at angstroms resolution	2.67e-117	F:copper ion binding; C:extracellular space; P:metabolic process; F:oxygen transporter activity; F:oxidoreductase activity; P:oxygen transport	2	2	-0.00567051	6.58889	-0.0868381	0.93321	1	-8.75938
0	3496574_1	ccaat enhancer binding protein zeta	2.45e-23	P:transcription from RNA polymerase II promoter; F:binding; P:regulation of transcription; F:DNA binding; C:nucleus	2	2	2.5931	10.5791	31.8896	6.72511e-09	1.23935e-06	11.1691
0	3496579_1	dihydrofolate reductase	6.44e-40	P:folic acid and derivative metabolic process; F:binding; P:nucleotide biosynthetic process; F:dihydrofolate reductase activity	2	2	0.542346	7.64765	7.72836	0.000108156	0.00319858	0.287697
0	3496585_2	PREDICTED: similar to AGAP011844-PA [Acyrthosiphon pisum]	2.99e-08	0	2	2	1.08531	7.44812	14.4668	1.65003e-06	8.93886e-05	5.00751
0	3496587_1	ubiquitin-conjugating enzyme e2n	4.96e-70	P:regulation of histone ubiquitination; P:double-strand break repair via homologous recombination; F:ubiquitin binding; C:cytosol; P:ubiquitin-dependent protein catabolic process; C:UBC13-MMS2 complex; P:positive regulation of I-kappaB kinase/NF-kappaB cascade; F:ubiquitin-protein ligase activity; P:positive regulation of histone modification; P:T cell receptor signaling pathway; P:positive regul…	2	2	0.659474	9.58598	13.8597	2.21343e-06	0.000114364	4.67581
0	3496588_4	t-complex protein 1 subunit gamma	6.93e-116	C:cytoplasm; P:auxin biosynthetic process; P:protein folding; P:mitotic spindle organization; F:ATP binding; F:unfolded protein binding; F:ATPase activity, coupled	2	2	1.21713	9.20066	20.8864	1.29981e-07	1.14341e-05	7.87001
0	3496590_1	aaa atpase containing von willebrand factor type a	5.34e-07	C:membrane; P:potassium ion transport; F:cation transmembrane transporter activity; C:nucleus; C:cytoplasm; F:ATP binding; F:zinc ion binding; F:catalytic activity; C:extrachromosomal circular DNA; C:intracellular; F:protein binding; P:metabolic process; F:metal ion binding; P:homophilic cell adhesion; F:calcium ion binding; F:binding	2	2	0.162775	6.68547	3.26635	0.0135627	0.256803	-5.05375
0	3496592_2	reactive oxygen species modulator 1	7.48e-29	P:replicative cell aging; P:positive regulation of cell proliferation; P:positive regulation of oxygen and reactive oxygen species metabolic process; P:cellular response to reactive oxygen species; C:integral to membrane; C:mitochondrial membrane	2	2	-0.125821	7.69382	-2.79802	0.026345	0.474661	-5.75722
0	3496593_2	arthrodial cuticle protein	1.78e-10	F:structural constituent of cuticle	2	2	0.0571478	6.6649	1.12859	0.295926	1	-8.09545
0	3496593_3	arthrodial cuticle protein	2.09e-10	F:structural constituent of cuticle	2	2	0.0113058	6.65265	0.234818	0.821009	1	-8.73234
0	3496593_4	arthrodial cuticle protein	3.3e-10	F:structural constituent of cuticle	1	1	0.155564	6.75702	2.1864	0.064665	1	-6.68038
0	3496596_1	hypothetical protein BRAFLDRAFT_170384 [Branchiostoma floridae]	2.21e-10	F:nucleic acid binding; F:nucleotide binding	1	1	0.053391	7.08341	0.534749	0.60923	1	-8.60372
0	3496598_1	prohibitin protein wph	3.07e-112	C:membrane; P:instar larval or pupal development; C:mitochondrial envelope; C:lipid particle	2	2	0.504715	11.5014	7.82124	0.000100187	0.00300584	0.37378
0	3496602_2	tho complex 5	2.86e-25	P:cellular process	2	2	-1.03744	11.2039	-22.7849	7.08564e-08	7.00721e-06	8.55033
0	3496602_4	tho complex subunit 5 homolog	6.21e-44	P:negative regulation of macrophage differentiation; F:protein binding	2	2	0.0794816	6.9586	1.297	0.235372	1	-7.90264
0	3496612_1	ring finger 1	2.67e-05	F:ligase activity; F:chromatin binding; F:nucleic acid binding; F:zinc ion binding; F:F; C:C; F:protein binding; F:metal ion binding; P:P	2	2	1.67169	7.72777	19.3619	2.20254e-07	1.73589e-05	7.27741
0	3496613_4	endonuclease-reverse transcriptase	7.3e-21	F:binding; F:transferase activity, transferring phosphorus-containing groups	2	2	0.372125	8.05942	8.69527	5.04692e-05	0.00165229	1.14578
0	3496617_3	ubiquitin-conjugating enzyme e2 variant 1	2.69e-58	C:cytosol; P:regulation of DNA repair; P:protein polyubiquitination; P:regulation of transcription, DNA-dependent; P:regulation of protein metabolic process; P:positive regulation of I-kappaB kinase/NF-kappaB cascade; F:ubiquitin-protein ligase activity; F:transcription activator activity; P:cell differentiation; F:protein binding; P:positive regulation of NF-kappaB transcription factor activity;…	2	2	-0.955673	7.65105	-5.52027	0.000859294	0.020184	-2.03225
0	3496618_3	hect domain containing 1	2.61e-67	F:metal ion binding; F:ubiquitin-protein ligase activity; C:intracellular; P:protein ubiquitination; F:transferase activity	2	2	-0.483848	8.30737	-4.83592	0.00183743	0.0405376	-2.87514
0	3496619_1	dead box atp-dependent rna helicase	3.57e-17	F:helicase activity; C:nucleus	2	2	2.08086	9.38598	16.9483	5.54396e-07	3.6731e-05	6.23802
0	3496619_2	dead box atp-dependent rna helicase	1.56e-23	F:helicase activity	2	2	0.937823	7.60285	20.1393	1.67507e-07	1.40771e-05	7.58515
0	3496626_1	eukaryotic translation initiation factor 2 alpha subunit	1.47e-94	P:mitotic spindle elongation; C:eukaryotic translation initiation factor 2B complex; P:formation of translation initiation ternary complex; F:GTP binding; C:eukaryotic translation initiation factor 2 complex; F:translation initiation factor activity; C:cytosol; F:tRNA binding	2	2	-0.643668	8.52167	-11.4219	8.24194e-06	0.000347498	3.19079
0	3496631_1	ribosomal protein s11	2.55e-66	F:structural constituent of ribosome; F:protein binding; C:cytosolic small ribosomal subunit; F:rRNA binding; P:translational elongation	2	2	2.28953	13.0921	25.754	3.00929e-08	3.58717e-06	9.50728
0	3496639_1	fumarylacetoacetate hydrolase	4.9e-43	F:fumarylacetoacetase activity; P:arginine catabolic process; P:aromatic amino acid family catabolic process; C:cytosol	2	2	0.45096	7.16139	10.3413	1.60577e-05	0.000618264	2.43761
0	3496643_1	serine protease	1.2e-11	P:proteolysis; F:serine-type endopeptidase activity; F:serine-type peptidase activity; F:hydrolase activity; F:catalytic activity; F:peptidase activity	2	2	-4.01058	9.07215	-21.5916	1.0313e-07	9.40513e-06	8.12967
0	3496650_1	apoptosis inhibitor	5.87e-08	P:anti-apoptosis; P:apoptosis; F:binding; F:fibroblast growth factor binding	2	2	1.02251	12.5176	18.8055	2.69697e-07	2.05894e-05	7.04959
0	3496651_1	glutathione peroxidase 3	8.81e-39	P:hydrogen peroxide catabolic process; F:glutathione peroxidase activity; C:extracellular space; P:response to lipid hydroperoxide; F:transcription factor binding; P:protein homotetramerization; F:selenium binding	2	2	0.00374081	6.75959	0.091176	0.929884	1	-8.75894
0	3496651_2	glutathione peroxidase 3	2.38e-39	P:hydrogen peroxide catabolic process; F:glutathione peroxidase activity; C:extracellular space; P:response to lipid hydroperoxide; F:transcription factor binding; P:protein homotetramerization; F:selenium binding	1	1	1.94811	8.95592	44.2983	6.66223e-10	2.52291e-07	13.6838
0	3496655_2	hypothetical protein NEMVEDRAFT_v1g4107 [Nematostella vectensis]	2.41e-07	0	2	2	0.13887	6.99242	2.8415	0.0247438	0.448806	-5.69141
0	3496661_3	riken cdna 1810013l24 gene	3.93e-29	F:F; P:P; C:C	2	2	-0.949203	8.25429	-14.4562	1.65833e-06	8.96347e-05	5.00185
0	3496668_1	tubulin beta-2c chain	0	P:microtubule-based movement; F:GTP binding; P:protein polymerization; F:structural molecule activity; F:GTPase activity; C:microtubule	2	2	2.05216	9.48207	30.3001	9.62918e-09	1.59962e-06	10.7728
0	3496673_2	cytochrome b561	3.37e-64	P:memory; P:locomotory behavior; F:catalytic activity	2	2	-0.130249	7.43468	-3.37722	0.0116379	0.223216	-4.88974
0	3496674_2	transmembrane emp24 protein transport domain containing 5	7.89e-41	C:cell part	2	2	-0.583905	7.18532	-12.5931	4.25561e-06	0.000195629	3.93746
0	3496676_3	40s ribosomal protein s2-like isoform 2	3.31e-74	F:structural constituent of ribosome; F:RNA binding; C:small ribosomal subunit; P:translation	2	2	3.58523	12.513	69.8201	2.6934e-11	3.15611e-08	16.9881
0	3496681_3	epididymal secretory protein e1 precursor	5.16e-21	C:extracellular region	2	2	2.69578	12.0363	54.4558	1.55502e-10	9.60925e-08	15.2176
0	3496684_1	isoform d	1.58e-63	F:nucleic acid binding; F:nucleotide binding; F:zinc ion binding; C:intracellular	2	2	0.774061	7.23651	14.9817	1.29769e-06	7.32663e-05	5.27868
0	3496686_1	btb poz domain-containing protein	4.11e-23	P:central nervous system development; P:eye-antennal disc morphogenesis; P:sex determination; P:sex-specific pigmentation; P:aggressive behavior; P:female gonad development; P:male courtship behavior, veined wing generated song production; P:imaginal disc-derived leg morphogenesis; P:muscle organ development; P:male sex differentiation; F:transcription factor activity; P:negative regulation of de…	2	2	-0.836247	9.13025	-7.0513	0.000193455	0.00534692	-0.365512
0	3496702_1	mitochondrial 39s ribosomal protein l4	2.47e-66	C:mitochondrial large ribosomal subunit; P:translation	2	2	-0.468722	7.42858	-6.83385	0.000235365	0.00637198	-0.585458
0	3496708_2	vacuolar atp synthase subunit ac39	1.09e-132	F:hydrogen-exporting ATPase activity, phosphorylative mechanism; P:ATP synthesis coupled proton transport; P:regulation of Notch signaling pathway; P:vacuolar acidification; C:vacuolar proton-transporting V-type ATPase, V0 domain	2	2	0.532471	7.47489	11.2058	9.37372e-06	0.000387586	3.04545
0	3496708_3	vacuolar atp synthase subunit ac39	4.4e-12	F:hydrogen-exporting ATPase activity, phosphorylative mechanism; P:ATP synthesis coupled proton transport; P:regulation of Notch signaling pathway; P:vacuolar acidification; P:response to copper ion; C:vacuolar proton-transporting V-type ATPase, V0 domain	2	2	-0.460999	11.0695	-7.94463	9.06037e-05	0.00275021	0.486886
0	3496709_1	suppression of tumorigenicity 1	1.76e-26	C:extracellular region	2	2	2.36222	8.64424	37.2167	2.27056e-09	6.18479e-07	12.3595
0	3496713_1	protein	3.75e-27	F:catalytic activity	2	2	-0.0427499	6.74962	-1.02526	0.33905	1	-8.2045
0	3496716_2	u1 small nuclear ribonucleoprotein c	6.73e-30	F:mRNA binding; F:zinc ion binding; P:regulation of alternative nuclear mRNA splicing, via spliceosome; P:mitotic spindle organization; C:U1 snRNP; C:U11 snRNP	2	2	-0.308392	7.32351	-4.07189	0.00464449	0.0955906	-3.89439
0	3496719_1	methyltransferase 11 domain containing 1	4.83e-07	F:methyltransferase activity; P:translation; F:copper ion binding	2	2	-2.11329	11.1111	-39.491	1.49582e-09	4.42372e-07	12.8129
0	3496719_2	methyltransferase 11 domain containing 1	1.33e-14	C:intracellular membrane-bounded organelle	2	2	-0.579259	7.6834	-5.96532	0.000541707	0.0134248	-1.51807
0	3496720_1	nadh: oxidoreductase subunit	4.63e-18	F:oxidoreductase activity	1	1	0.219985	10.4375	3.34347	0.0121907	0.23317	-4.93953
0	3496722_1	uba and wwe domain containing 1	4.16e-09	C:cytoplasm; C:nucleolus; P:histone ubiquitination; F:protein binding; P:protein polyubiquitination; F:ubiquitin-protein ligase activity	2	2	0.0687977	6.72405	1.49294	0.178695	1	-7.65827
0	3496725_3	translocon-associated protein subunit beta	1.61e-40	C:cytoplasmic part	1	1	0.94695	9.11535	8.1751	7.53469e-05	0.00233854	0.694411
0	3496727_2	copper transport protein atox1	2.27e-18	P:metal ion transport; F:metal ion binding	2	2	1.17312	7.42802	18.3722	3.17056e-07	2.35254e-05	6.86751
0	3496730_3	pol-like protein	4.39e-18	F:nucleic acid binding; F:RNA binding; F:nucleotidyltransferase activity; F:transferase activity; F:ribonuclease H activity; P:RNA-dependent DNA replication; F:RNA-directed DNA polymerase activity	2	2	3.45822	9.64121	28.5348	1.46716e-08	2.16432e-06	10.3063
0	3496732_1	ribosomal protein l24e	2.34e-50	P:mitotic spindle elongation; C:mitochondrial large ribosomal subunit; F:structural constituent of ribosome; C:lipid particle; C:cytosolic large ribosomal subunit; P:translation	2	2	1.878	13.5217	18.8039	2.69862e-07	2.05894e-05	7.0489
0	3496736_1	copia-type -like	1.06e-35	F:nucleic acid binding; P:DNA integration; F:peptidase activity; F:zinc ion binding; F:endonuclease activity; F:RNA-directed DNA polymerase activity; F:DNA binding	2	2	1.10967	7.16416	18.7054	2.79883e-07	2.12495e-05	7.00788
0	3496744_1	mitochondrial ribosomal protein l24	6.07e-79	C:mitochondrial large ribosomal subunit; P:translation	2	2	-1.34832	11.0933	-22.8085	7.03454e-08	6.97891e-06	8.55843
0	3496745_1	hypothetical protein TcasGA2_TC014459 [Tribolium castaneum]	1.85e-26	F:structural molecule activity; C:integral to membrane; C:membrane; C:tight junction	2	2	1.06534	7.19295	13.6104	2.50592e-06	0.000126425	4.53565
0	3496749_1	vacuolar atp synthase subunit f	1.7e-45	F:hydrogen-exporting ATPase activity, phosphorylative mechanism; F:hydrogen ion transporting ATP synthase activity, rotational mechanism; C:vacuolar proton-transporting V-type ATPase, V1 domain; P:ATP synthesis coupled proton transport; F:proton-transporting ATPase activity, rotational mechanism; P:retina development in camera-type eye	2	2	-0.324982	7.74146	-2.52638	0.0391386	0.683357	-6.16898
0	3496754_1	26s proteasome subunit s9	3.25e-129	C:proteasome regulatory particle, lid subcomplex; P:proteolysis; F:endopeptidase activity	2	2	-0.14595	7.67005	-1.62607	0.147561	1	-7.48207
0	3496762_6	eukaryotic translation initiation factor 4e	4.3e-38	P:mitotic spindle elongation; F:translation initiation factor activity; P:female meiosis chromosome segregation; P:translational initiation; P:RNA metabolic process; F:SUMO binding; P:salivary gland cell autophagic cell death; P:mitotic chromosome condensation; F:RNA cap binding; P:positive regulation of cell growth; P:chromatin organization; C:cytoplasm; C:postsynaptic density	2	2	0.432999	10.3646	6.70685	0.000264513	0.0070717	-0.716321
0	3496763_2	dynactin 3	4.11e-15	C:cytoplasmic part; C:cytoskeletal part; P:cellular process; C:microtubule cytoskeleton	2	2	-0.082429	11.1915	-2.02334	0.0823407	1	-6.92101
0	3496765_2	ino80 complex subunit e	6.85e-08	F:F; P:P; C:C	2	2	-0.254911	10.0149	-5.74836	0.000676253	0.0162912	-1.7655
0	3496767_2	something about silencing protein 10	2.22e-28	F:F; P:brain development; P:multicellular organismal development; P:chromatin modification; F:protein binding; C:nucleolus; C:nucleus; P:gene silencing	2	2	3.05177	10.0406	24.7451	3.98015e-08	4.40618e-06	9.1953
0	3496770_1	40s ribosomal protein s4	5.28e-09	F:RNA binding; F:structural constituent of ribosome; P:translation; C:cytoplasm; C:ribonucleoprotein complex; C:ribosome; F:rRNA binding; C:intracellular	2	2	-0.00167654	6.64114	-0.0222367	0.982874	1	-8.7634
0	3496771_1	atp-dependent rna helicase has1	1.69e-12	F:helicase activity; P:auxin biosynthetic process; P:ribosome biogenesis; C:nucleus; F:hydrolase activity; P:rRNA processing; F:nucleic acid binding; F:nucleotide binding; F:RNA binding; F:ATP binding; F:ATP-dependent helicase activity; C:nucleolus	1	1	0.846405	7.73634	18.5781	2.93464e-07	2.20648e-05	6.95455
0	3496771_2	atp-dependent rna	4.3e-16	F:binding; F:catalytic activity	2	2	-0.104951	8.13906	-1.58385	0.156845	1	-7.53873
0	3496778_1	26s proteasome regulatory subunit rpn1	7.07e-108	P:mitotic spindle elongation; P:regulation of protein catabolic process; F:endopeptidase activity; C:proteasome regulatory particle, base subcomplex; F:binding; P:cell proliferation; F:enzyme regulator activity; P:proteolysis	2	2	0.600522	11.7319	11.4758	7.98411e-06	0.000338697	3.22669
0	3496779_1	signal recognition particle receptor alpha subunit (sr-alpha)	1.75e-117	F:mRNA binding; C:signal recognition particle receptor complex; F:receptor activity; P:regulation of protein secretion; F:protein binding; P:axonogenesis; F:GTPase activity; P:SRP-dependent cotranslational protein targeting to membrane; C:lipid particle; F:GTP binding; F:signal recognition particle binding	2	2	-1.12398	12.2547	-11.1872	9.47907e-06	0.000391421	3.03283
0	3496789_1	pol-like protein	1.71e-07	0	2	2	-0.00847674	9.85661	-0.144944	0.888803	1	-8.75171
0	3496790_1	26s protease regulatory subunit 4	3.49e-22	C:cytoplasm; P:auxin biosynthetic process; F:peptidase activity; P:protein catabolic process; F:ATP binding; C:proteasome complex; F:nucleoside-triphosphatase activity	2	2	0.335799	8.75768	5.1452	0.00129303	0.0293293	-2.48615
0	3496790_2	26s protease regulatory subunit 4	0	F:endopeptidase activity; P:mitotic spindle elongation; F:protein binding; P:response to DNA damage stimulus; P:auxin biosynthetic process; P:cell proliferation; C:cytoplasm; C:nucleolus; C:proteasome regulatory particle, base subcomplex; P:positive regulation of ubiquitin-protein ligase activity during mitotic cell cycle; F:ATPase activity; P:anaphase-promoting complex-dependent proteasomal ubiq…	2	2	0.950479	10.6309	16.099	7.90752e-07	4.86233e-05	5.83761
0	3496794_4	domain-containing protein	3.73e-35	F:heat shock protein binding	2	2	2.95863	9.99836	52.421	2.03397e-10	1.13801e-07	14.9383
0	3496797_3	ubiquitin-conjugating enzyme e2l 3	5.83e-68	C:cytoplasm; P:protein ubiquitination; P:ubiquitin-dependent protein catabolic process; F:ATP binding; F:ubiquitin-protein ligase activity; F:enzyme binding; P:regulation of protein metabolic process; C:ubiquitin ligase complex	2	2	-0.242855	8.83418	-3.8653	0.00605798	0.121994	-4.18401
0	3496798_4	nadh-cytochrome b5 reductase 3	8.56e-117	F:cytochrome-b5 reductase activity; C:mitochondrial inner membrane; P:oxidation reduction; C:mitochondrial outer membrane; P:unsaturated fatty acid biosynthetic process; P:fatty acid elongation; F:FAD binding; C:endoplasmic reticulum membrane; P:cholesterol biosynthetic process; P:drug metabolic process	2	2	-0.213095	8.07768	-3.52245	0.00954834	0.18566	-4.67681
0	3496809_1	cleavage stimulation 3 pre- subunit 77kda	7.13e-163	P:mRNA polyadenylation; P:RNA splicing; F:RNA binding; F:protein binding; C:nucleus; P:mRNA cleavage	2	2	0.0522695	6.93432	0.782823	0.459158	1	-8.42834
0	3496811_2	cg13605 cg13605-pa	5.82e-05	F:metal ion binding; C:integral to membrane; C:membrane; F:zinc ion binding; F:protein binding	2	2	-4.75738	10.3578	-62.4562	5.91357e-11	5.2466e-08	16.2065
0	3496811_3	pol-like protein	1.21e-34	F:nucleic acid binding; F:RNA binding; F:ribonuclease H activity; P:RNA-dependent DNA replication; F:RNA-directed DNA polymerase activity	2	2	0.85448	7.90015	9.4079	3.00907e-05	0.00106547	1.72885
0	3496811_5	ap-like endonuclease reverse transcriptase	1.06e-72	F:catalytic activity	2	2	0.306662	6.89752	6.04204	0.000501522	0.0125391	-1.43202
0	3496818_1	inner membrane protein	4.74e-27	C:membrane	2	2	-0.11722	9.07099	-1.08144	0.315022	1	-8.14614
0	3496822_1	phosphomevalonate kinase	4.31e-46	C:soluble fraction; P:isopentenyl diphosphate biosynthetic process, mevalonate pathway; F:phosphomevalonate kinase activity; F:protein binding; P:steroid biosynthetic process; P:protein amino acid phosphorylation	2	2	0.311854	7.09832	8.17643	7.52679e-05	0.00233725	0.695593
0	3496824_2	26s proteasome non-atpase regulatory subunit 8	3.84e-79	C:proteasome complex; P:negative regulation of ubiquitin-protein ligase activity during mitotic cell cycle; C:nucleolus; P:anaphase-promoting complex-dependent proteasomal ubiquitin-dependent protein catabolic process; P:positive regulation of ubiquitin-protein ligase activity during mitotic cell cycle; F:protein binding; C:cytoplasm	2	2	-1.45576	12.6588	-23.7814	5.25441e-08	5.49368e-06	8.88493
0	3496825_3	gametocyte specific factor 1	7.44e-06	0	1	1	-4.56459	12.5726	-59.6743	8.15541e-11	6.49348e-08	15.8809
0	3496826_1	heterogeneous nuclear ribonucleoprotein	5.24e-66	C:polytene chromosome puff; F:mRNA binding; P:regulation of alternative nuclear mRNA splicing, via spliceosome; P:negative regulation of RNA splicing; F:sequence-specific DNA binding; C:heterogeneous nuclear ribonucleoprotein complex; F:nucleotide binding	2	2	0.446781	11.2067	8.65541	5.20053e-05	0.00169721	1.11199
0	3496827_1	actin-related protein 2 3 complex subunit 1a	5.05e-138	C:Arp2/3 protein complex; P:cytoplasmic transport, nurse cell to oocyte; P:compound eye morphogenesis; P:female germline ring canal stabilization; P:actin filament polymerization; P:axonal fasciculation; P:actin filament reorganization involved in cell cycle; F:actin binding; P:pseudocleavage during syncytial blastoderm formation; P:bristle morphogenesis	2	2	1.05829	10.9138	16.8426	5.78907e-07	3.78852e-05	6.18925
0	3496829_1	PREDICTED: hypothetical protein [Saccoglossus kowalevskii]	6.67e-09	F:selenium binding; C:integral to endoplasmic reticulum membrane; P:intracellular protein transport	2	2	-0.0432693	7.30171	-0.766986	0.467937	1	-8.44125
0	3496834_2	propionyl coenzyme a beta polypeptide	1.27e-143	F:protein binding; C:mitochondrial matrix; F:ATP binding; F:propionyl-CoA carboxylase activity	2	2	-0.24429	7.4726	-4.91592	0.00167563	0.0371793	-2.77322
0	3496836_1	nuclear pore complex protein nup107	2.04e-36	P:mRNA export from nucleus; C:Nup107-160 complex; C:kinetochore; F:nucleocytoplasmic transporter activity; F:protein binding	2	2	-0.500079	10.9771	-11.6681	7.13691e-06	0.000305513	3.3534
0	3496840_1	phenylalanyl-trna synthetase	9.48e-127	F:binding; F:aminoacyl-tRNA ligase activity; P:tRNA aminoacylation for protein translation; P:lysosome organization	2	2	-0.629901	7.59995	-4.59449	0.00244027	0.0527965	-3.18824
0	3496841_1	cathepsin l	2.19e-90	F:peptidase activity	2	2	1.77853	8.92096	42.6732	8.66832e-10	2.99081e-07	13.4016
0	3496846_2	heat shock 70 kd protein cognate	2.52e-121	P:auxin biosynthetic process; P:sleep; F:ATPase activity; C:lipid particle; P:RNA interference; F:ATP binding; C:endoplasmic reticulum; P:response to heat	2	2	0.446511	10.3612	4.55362	0.00256251	0.055316	-3.24207
0	3496850_1	deoxyhypusine synthase	1.98e-146	P:peptidyl-lysine modification to hypusine	2	2	-0.841599	9.74398	-10.0932	1.88786e-05	0.000712304	2.25491
0	3496852_2	proteasome 26s non-atpase subunit 7	7.26e-107	P:mitotic spindle elongation; F:endopeptidase activity; C:dendrite; C:proteasome regulatory particle, lid subcomplex; P:cell proliferation; P:ubiquitin-dependent protein catabolic process	2	2	0.0216032	9.29556	0.506743	0.627762	1	-8.61975
0	3496854_2	member ras oncogene family	1.26e-58	C:early endosome membrane; P:small GTPase mediated signal transduction; F:sphingomyelin phosphodiesterase activity; C:endocytic vesicle; C:melanosome; F:protein binding; F:GTPase activity; P:regulation of endocytosis; P:endosome organization; P:protein transport; F:GTP binding; C:plasma membrane	2	2	0.0135117	7.84422	0.3077	0.767182	1	-8.71001
0	3496854_3	tbp-associated factor 5	3.26e-37	P:chromatin modification; F:transcription initiation factor activity; P:transcription initiation from RNA polymerase II promoter; C:nucleolus; F:promoter binding; C:transcription factor TFTC complex; F:protein dimerization activity; C:actin cytoskeleton; F:transcription factor activity; P:RNA elongation from RNA polymerase II promoter; F:histone acetyltransferase activity; C:transcription factor …	2	2	-1.77965	8.28834	-19.5764	2.04015e-07	1.63488e-05	7.36353
0	3496855_4	riken cdna isoform cra_a	2.2e-21	C:mitochondrion; F:F; P:P	2	2	-0.661869	7.67585	-6.01771	0.000513891	0.0128169	-1.45923
0	3496860_1	fk506 binding protein 4	8.06e-11	C:integral to membrane	2	2	-0.13772	7.43118	-2.56267	0.0371095	0.652146	-6.114
0	3496861_1	sodium-bile acid cotransporter	5.98e-63	P:sodium ion transport; F:bile acid:sodium symporter activity; C:membrane	2	2	0.124449	6.97549	2.99231	0.0199383	0.367874	-5.46372
0	3496864_1	testis expressed 10	1.33e-08	C:integral to membrane; C:membrane; C:nucleus; F:F; C:C; C:nuclear membrane; C:nucleolus; C:MLL1 complex; P:P; F:binding	2	2	0.168042	6.81928	3.12735	0.0164705	0.307917	-5.26097
0	3496868_1	dna replication licensing factor mcm7	4.71e-21	P:auxin biosynthetic process; F:3'-5' DNA helicase activity; F:DNA binding; F:ATP binding; P:DNA replication initiation; C:pre-replicative complex; P:pre-replicative complex assembly; F:chromatin binding	2	2	0.138589	8.31248	1.12744	0.296379	1	-8.0967
0	3496870_4	---NA---	0	0	2	2	-0.0232629	7.01053	-0.571931	0.585096	1	-8.58122
0	3496871_1	integrator complex subunit 3	3.08e-55	C:SOSS complex; F:protein binding; P:response to ionizing radiation; P:snRNA processing; P:G2/M transition checkpoint; P:DNA repair; C:integrator complex	2	2	-0.814239	7.68296	-7.42996	0.00013902	0.00397141	0.00550836
0	3496875_1	splicing factor subunit 3	4.13e-163	P:protein complex assembly; F:nucleic acid binding; C:spliceosomal complex; F:protein binding; P:RNA splicing, via transesterification reactions; C:small nuclear ribonucleoprotein complex; P:mRNA processing	2	2	-0.353866	12.0727	-6.65401	0.000277817	0.00740506	-0.771302
0	3496875_2	splicing factor 3b subunit 3	2.15e-141	P:protein complex assembly; C:U2 snRNP; F:nucleic acid binding; P:mitotic spindle organization; F:protein binding; C:precatalytic spliceosome; P:nuclear mRNA splicing, via spliceosome; C:catalytic step 2 spliceosome	2	2	0.120307	7.27988	2.07329	0.0764688	1	-6.84778
0	3496881_1	cytochrome oxidase subunit i	3.43e-18	F:oxidoreductase activity; F:iron ion binding; P:oxidation reduction; C:membrane part; C:mitochondrion; P:generation of precursor metabolites and energy	2	2	0.0638742	6.87433	1.29727	0.235284	1	-7.90232
0	3496882_1	alcohol dehydrogenase	7.04e-79	P:response to toxin; F:oxidoreductase activity; P:metabolic process	2	2	0.41028	8.15696	3.65727	0.00796759	0.157038	-4.4813
0	3496885_2	serine threonine-protein phosphatase pp1-beta	1.69e-49	F:phosphoprotein phosphatase activity	2	2	-0.245692	7.43726	-4.39831	0.00309235	0.0658157	-3.44878
0	3496887_1	isoform a	8.61e-12	0	2	2	1.88524	7.81011	21.4234	1.08908e-07	9.85967e-06	8.06852
0	3496888_1	vacuolar h	1.46e-146	F:hydrogen-exporting ATPase activity, phosphorylative mechanism; F:hydrogen ion transporting ATP synthase activity, rotational mechanism; C:vacuolar proton-transporting V-type ATPase, V1 domain; P:ATP synthesis coupled proton transport; F:proton-transporting ATPase activity, rotational mechanism	2	2	0.700792	7.86818	12.1121	5.54328e-06	0.000245728	3.63884
0	3496888_2	h(+)-transporting atpase	2.91e-54	C:cytosol; F:hydrogen ion transporting ATP synthase activity, rotational mechanism; C:integral to membrane; P:ATP synthesis coupled proton transport; F:proton-transporting ATPase activity, rotational mechanism; C:proton-transporting V-type ATPase, V1 domain; C:plasma membrane	2	2	-1.17176	12.82	-27.9095	1.7137e-08	2.41692e-06	10.1339
0	3496890_2	niemann-pick type c-	2.97e-07	0	2	2	2.12247	7.97435	42.3661	9.1206e-10	3.09527e-07	13.3469
0	3496892_2	n-acetylglucosamine-1-phosphate gamma subunit	1.31e-31	P:N-glycan processing to lysosome; F:UDP-N-acetylglucosamine-lysosomal-enzyme N-acetylglucosaminephosphotransferase activity; C:microsome; F:protein binding; C:membrane	2	2	-0.444002	7.4121	-9.71629	2.43097e-05	0.000886526	1.96954
0	3496894_2	trafficking protein particle complex subunit 6b	5.68e-49	0	2	2	-0.522228	7.43548	-5.76501	0.000664701	0.0160598	-1.7463
0	3496895_1	dna-directed rna polymerases and iii subunit rpabc3	3.72e-61	F:DNA-directed RNA polymerase activity; F:zinc ion binding; F:protein kinase activity; P:transcription initiation from RNA polymerase II promoter; C:nucleolus; P:RNA splicing; C:DNA-directed RNA polymerase II, core complex; F:protein binding; P:RNA elongation from RNA polymerase II promoter	2	2	0.969369	10.5428	22.6658	7.34964e-08	7.18817e-06	8.50936
0	3496896_1	u6 snrna-associated sm-like protein lsm5	2.53e-31	C:cytoplasm; P:mRNA catabolic process; P:RNA splicing; F:RNA binding; P:mRNA processing; C:ribonucleoprotein complex; C:nucleus; F:protein heterodimerization activity	2	2	2.22419	9.70127	43.8484	7.15892e-10	2.6623e-07	13.6069
0	3496899_1	domain containing 1	1.46e-06	0	2	2	0.117375	6.84445	1.55057	0.164541	1	-7.58289
0	3496899_2	domain containing 1	3.3e-24	F:F; P:P	2	2	-0.224274	8.49244	-1.84983	0.106397	1	-7.17141
0	3496901_1	isoform b	2.22e-164	P:auxin biosynthetic process; C:6-phosphofructokinase complex; F:6-phosphofructokinase activity; F:DNA binding; C:polytene chromosome; F:protein binding; F:nucleotide binding; P:glycolysis; P:chromatin remodeling; C:nucleus	2	2	-0.0475174	6.79267	-1.01747	0.342497	1	-8.21242
0	3496910_1	nucleoside diphosphate kinase 7	1.6e-12	P:pyrimidine ribonucleoside triphosphate biosynthetic process; C:cytoplasmic membrane-bounded vesicle; F:nucleotide binding; F:kinase activity; P:pyrimidine ribonucleoside metabolic process	2	2	-1.27202	8.61186	-8.31978	6.72582e-05	0.00212142	0.822276
0	3496915_1	adenosine deaminase	2.76e-60	F:double-stranded RNA adenosine deaminase activity; P:adult locomotory behavior; F:RNA binding; P:regulation of membrane potential; P:adenosine to inosine editing; P:response to hypoxia; P:mRNA modification; P:response to heat	2	2	-1.38805	8.21228	-14.674	1.49658e-06	8.26175e-05	5.11771
0	3496915_2	adenosine rna- b1	1.54e-10	F:binding	2	2	0.0623271	6.82366	1.39261	0.205987	1	-7.78584
0	3496917_4	na+ k+ atpase alpha subunit	6.96e-66	F:sodium:potassium-exchanging ATPase activity; P:auxin biosynthetic process; C:integral to membrane; P:monovalent inorganic cation transport; F:monovalent inorganic cation transmembrane transporter activity; P:ATP biosynthetic process; F:ATP binding	2	2	0.445757	7.30884	7.10361	0.000184672	0.00512469	-0.31337
0	3496918_3	polymerase delta-interacting protein 3	1.38e-07	F:nucleic acid binding; F:nucleotide binding	2	2	0.669107	8.51904	12.8462	3.71674e-06	0.000174473	4.0904
0	3496918_4	polymerase delta interacting protein 3	2.54e-07	F:nucleic acid binding; F:nucleotide binding	2	2	0.203916	7.10041	2.93063	0.0217723	0.399223	-5.5567
0	3496919_1	zinc finger ccch-type containing 11a	2.11e-19	F:protein binding	2	2	0.796276	7.19571	8.5239	5.7461e-05	0.00184998	0.999595
0	3496920_1	domain containing 3	3.1e-31	F:F; P:P	2	2	-0.186033	9.44878	-3.28011	0.0133064	0.252333	-5.03333
0	3496921_1	cathepsin l	2.89e-59	F:hydrolase activity	2	2	5.23494	11.8349	44.3728	6.5838e-10	2.51668e-07	13.6965
0	3496923_1	hiv-1 rev-binding	5.1e-69	C:nucleolus; C:nucleoplasm; P:rRNA processing	2	2	1.0142	9.97236	10.0362	1.96049e-05	0.000736131	2.2123
0	3496924_1	nucleolar protein 120kda	1.73e-114	C:nucleolus; F:S-adenosylmethionine-dependent methyltransferase activity; F:RNA binding	2	2	3.26128	9.72212	13.9817	2.08456e-06	0.00010925	4.74356
0	3496928_2	lipoma hmgic fusion partner-like 2	8.61e-18	F:F; C:integral to membrane; C:membrane; P:P	2	2	-0.391278	7.16215	-5.28694	0.00110557	0.0254019	-2.31235
0	3496934_1	chaperonin containing subunit 6a (zeta 1)	1.48e-30	P:protein folding; C:lipid particle; P:mitotic spindle organization; F:unfolded protein binding; F:ATPase activity, coupled; P:centriole replication; F:nucleotide binding	2	2	1.07376	11.8315	16.3991	6.96093e-07	4.38002e-05	5.98141
0	3496934_2	chaperonin containing subunit 6a (zeta 1)	1.13e-114	P:auxin biosynthetic process; P:protein folding; C:chaperonin-containing T-complex; F:ATP binding; F:unfolded protein binding	2	2	1.20825	8.39877	19.7948	1.88863e-07	1.53526e-05	7.45029
0	3496940_1	cyclin a	2.32e-77	P:Ras protein signal transduction; P:positive regulation of fibroblast proliferation; P:organ regeneration; P:cell cycle; C:male pronucleus; P:response to glucagon stimulus; P:cell division; C:female pronucleus; F:protein binding; P:response to estradiol stimulus; C:nucleoplasm; C:cytoplasm; P:positive regulation of transcription	2	2	-2.44297	12.2896	-34.5299	3.84562e-09	8.52972e-07	11.7836
0	3496942_3	dolichol-phosphate mannosyltransferase subunit 3	3.46e-14	F:transferase activity; F:transferase activity, transferring glycosyl groups	2	2	-0.252396	7.34341	-5.84359	0.000613075	0.0149314	-1.65615
0	3496951_1	nadh dehydrogenase	1.38e-39	P:mitochondrial electron transport, NADH to ubiquinone; F:NADH dehydrogenase (ubiquinone) activity	2	2	-0.578874	10.3594	-10.6771	1.29673e-05	0.00051295	2.67896
0	3496956_5	tho complex subunit 3	1.29e-102	F:acyltransferase activity	2	2	0.535618	8.92462	5.76295	0.00066612	0.0160783	-1.74868
0	3496957_1	threonine dehydrogenase	4.69e-124	F:UDP-glucose 4-epimerase activity; P:cellular metabolic process; F:coenzyme binding	2	2	-0.415144	7.25445	-7.7435	0.000106809	0.00316846	0.301788
0	3496962_1	eukaryotic peptide chain release factor gtp-binding	2.13e-118	P:translational termination; F:GTP binding; F:translation release factor activity; C:cytosol; F:GTPase activity	2	2	-1.20081	13.9149	-21.7637	9.75745e-08	9.01765e-06	8.19177
0	3496964_1	spaghetti squash	3.3e-89	P:cytokinesis; F:calcium ion binding; C:midbody; C:unconventional myosin complex; P:cellularization; P:nuclear axial expansion; F:ATPase activity, coupled; P:regulation of actin cytoskeleton organization; P:imaginal disc-derived wing hair organization; F:myosin heavy chain binding; P:border follicle cell migration; C:cleavage furrow; P:establishment of planar polarity; C:cytoplasm; C:spindle midz…	2	2	1.36381	11.0561	25.1537	3.54928e-08	4.01508e-06	9.32319
0	3496970_2	ubiquitin specific	0.000147	P:visual perception; C:cilium; P:response to stimulus; C:cytoplasm; P:eye photoreceptor cell development; C:Golgi apparatus; F:protein binding; F:guanyl-nucleotide exchange factor activity	2	2	1.16705	7.41855	11.7106	6.96388e-06	0.000299925	3.38112
0	3496971_4	mitochondrial ribosomal protein l12	5.81e-20	P:nematode larval development; C:intracellular; F:protein binding; P:positive regulation of growth rate; P:determination of adult lifespan; P:cellular process	1	1	-0.267761	10.8031	-5.39362	0.000984368	0.0228624	-2.18336
0	3496972_1	fucosyl transferase family protein	1.02e-15	F:transferase activity; C:membrane	2	2	-0.344174	7.17201	-6.29679	0.000390193	0.0100095	-1.15152
0	3496974_1	serpin b6	1.54e-85	P:negative regulation of Toll signaling pathway	2	2	0.268512	7.98365	1.61755	0.149391	1	-7.49355
0	3496975_1	pt repeat family protein	6.42e-07	P:regulation of transcription, DNA-dependent; P:lipid metabolic process; P:interspecies interaction between organisms; P:transcription; P:regulation of transcription; C:host cell nucleus; F:DNA binding	2	2	0.0837561	6.80712	1.76568	0.120396	1	-7.2901
0	3496982_4	valyl-trna synthetase	3.52e-52	F:ligase activity; P:cellular biosynthetic process	2	2	-1.3056	12.0187	-32.2715	6.18569e-09	1.17122e-06	11.2613
0	3496984_3	fn5 protein	3.12e-12	C:integral to membrane	2	2	-0.649429	7.89766	-5.80134	0.000640251	0.0155263	-1.70452
0	3496985_1	uncharacterized conserved protein	2.17e-09	0	2	2	0.593839	8.73051	8.83038	4.56312e-05	0.00151304	1.25935
0	3496986_2	mitochondrial dicarboxylate carrier	1.16e-76	P:succinate transport; F:binding; C:mitochondrial inner membrane; F:thiosulfate transmembrane transporter activity; P:sulfate transport; P:phosphate transport; P:transmembrane transport; F:phosphate transmembrane transporter activity; P:mitochondrial transport; P:malate transport; F:sulfate transmembrane transporter activity; C:integral to membrane; F:succinate transmembrane transporter activity;…	2	2	-0.276639	7.24329	-5.50228	0.000875925	0.0205441	-2.05358
0	3496989_2	ring finger and chy zinc finger domain containing 1	2.65e-73	F:p53 binding; F:zinc ion binding; F:lyase activity; P:positive regulation of protein ubiquitination; F:receptor binding; F:ubiquitin-protein ligase activity; P:protein autoubiquitination; C:ubiquitin ligase complex; P:positive regulation of proteasomal ubiquitin-dependent protein catabolic process; F:protein homodimerization activity; C:cytoplasm; C:nucleus; P:protein ubiquitination during ubiqu…	2	2	-0.333977	7.49953	-6.5163	0.000316163	0.00831299	-0.916105
0	3496999_3	isocitrate dehydrogenase 2 (nadp+) mitochondrial	9.22e-92	F:NAD or NADH binding; F:isocitrate dehydrogenase (NADP+) activity; P:2-oxoglutarate metabolic process; P:oxidation reduction; F:magnesium ion binding; P:tricarboxylic acid cycle; P:isocitrate metabolic process; C:mitochondrion; P:glyoxylate cycle	2	2	0.724182	8.04357	13.0661	3.31097e-06	0.000158908	4.22099
0	3497008_2	zinc iron transporter	2.56e-09	P:oxidation reduction; F:oxidoreductase activity; C:membrane; F:2-alkenal reductase activity; P:transmembrane transport; P:metal ion transport; F:metal ion transmembrane transporter activity	2	2	2.12669	8.19095	43.3414	7.76989e-10	2.77327e-07	13.5191
0	3497009_1	proteasome alpha 4 subunit	8.67e-96	C:cytoplasm; C:proteasome core complex, alpha-subunit complex; P:ubiquitin-dependent protein catabolic process; C:nucleus; F:threonine-type endopeptidase activity	2	2	0.727871	8.76336	11.6801	7.08748e-06	0.000303983	3.36125
0	3497012_2	60s ribosomal protein l11	1.03e-05	F:RNA binding; P:reproduction; P:nematode larval development; P:induction of apoptosis; F:F; C:ribonucleoprotein complex; P:protein targeting; P:ribosomal large subunit biogenesis; P:embryonic development ending in birth or egg hatching; F:structural constituent of ribosome; P:embryonic development; P:inductive cell migration; P:growth; P:translational elongation; P:hermaphrodite genitalia develo…	2	2	0.0346812	6.85893	0.706935	0.502247	1	-8.48814
0	3497014_1	ccr4-not transcription subunit 10	7.54e-20	F:binding; F:protein binding	2	2	0.128279	6.903	2.04424	0.0798313	1	-6.89042
0	3497018_1	nuclear nucleic acid-binding protein c1d	1.09e-08	P:cellular process; C:protein complex; F:nucleic acid binding; C:nuclear lumen; F:protein binding	2	2	1.50652	8.12417	20.1917	1.64504e-07	1.3919e-05	7.60547
0	3497019_2	family with sequence similarity member a	7.42e-37	F:F; P:P; C:C	2	2	-0.00098106	7.52078	-0.0123388	0.990496	1	-8.76359
0	3497024_1	ran-binding protein	1.71e-30	F:binding; F:zinc ion binding; C:intracellular; P:intracellular transport	2	2	0.217936	7.08848	4.05326	0.00475583	0.0976075	-3.92026
0	3497028_2	niemann-pick type c-	3.24e-07	0	2	2	3.20279	8.86763	63.5772	5.21605e-11	4.90822e-08	16.3327
0	3497031_2	acyl-coenzyme a binding domain containing 6	7.85e-50	F:F; F:binding; F:acyl-CoA binding; C:cytoplasm; P:P; C:C	2	2	0.868558	11.2336	18.9987	2.5122e-07	1.94055e-05	7.12945
0	3497033_3	transposase [Chrysops vittatus]	1.2e-05	0	2	2	0.000804876	6.40227	0.0197581	0.984783	1	-8.76346
0	3497034_1	rho family small gtp binding protein cdc42	9.89e-102	C:adherens junction; P:maintenance of protein location; F:GTP binding; C:intracellular; P:positive regulation of protein kinase activity; P:multicellular organismal development; F:sphingomyelin phosphodiesterase activity; P:small GTPase mediated signal transduction	2	2	-0.0677811	7.59954	-1.22422	0.260112	1	-7.98811
0	3497035_1	mad1 mitotic arrest deficient-like 1	7.36e-20	C:protein complex; P:cell cycle; C:intracellular non-membrane-bounded organelle; C:intracellular organelle part; C:cytoplasm	2	2	0.0177297	7.34885	0.231358	0.823593	1	-8.73325
0	3497041_1	component of oligomeric golgi complex 5	1.62e-43	P:intra-Golgi vesicle-mediated transport; F:protein binding; P:inter-Golgi cisterna vesicle-mediated transport; C:Golgi transport complex	2	2	-0.393864	8.9158	-7.5862	0.000121776	0.00354732	0.154346
0	3497053_3	periodic tryptophan protein 2 homolog	2.44e-45	F:signal transducer activity; P:signal transduction	2	2	1.6366	9.01791	28.9363	1.33018e-08	2.02975e-06	10.415
0	3497055_1	profilin	1.04e-31	C:intracellular part	2	2	4.56783	9.73503	43.3625	7.74335e-10	2.77327e-07	13.5227
0	3497058_1	cathepsin b	1.11e-80	F:peptidase activity	2	2	0.297586	6.96262	5.96451	0.000542152	0.0134305	-1.51899
0	3497071_1	succinate dehydrogenase assembly factor mitochondrial precursor	3.07e-35	P:protein-FAD linkage; F:protein binding; P:mitochondrial electron transport, succinate to ubiquinone; C:mitochondrion	2	2	0.264819	6.78812	6.82437	0.000237411	0.00641897	-0.59516
0	3497073_2	rna pseudouridylate synthase domain containing 1	5.93e-48	F:RNA binding; F:F; P:RNA modification; P:pseudouridine synthesis; P:P; F:pseudouridine synthase activity; C:C	2	2	-1.83002	10.9852	-43.4542	7.62904e-10	2.75466e-07	13.5387
0	3497074_2	haus augmin-like complex subunit 3	3.22e-09	P:centrosome organization; C:HAUS complex; P:spindle assembly	2	2	-0.404568	7.84457	-4.81387	0.00188502	0.0415433	-2.9034
0	3497076_3	mitochondrial ribosomal protein l20	1.43e-20	F:structural constituent of ribosome; P:translation; C:mitochondrion	2	2	-0.559511	8.65819	-5.63285	0.000762841	0.0181797	-1.89973
0	3497081_1	trna nucleotidyl cca- 1	1.59e-100	C:mitochondrion; F:tRNA adenylyltransferase activity; P:protein targeting to mitochondrion; F:ATP binding; P:tRNA 3'-end processing; F:tRNA binding	2	2	2.33983	9.14164	8.75539	4.82482e-05	0.00158795	1.1965
0	3497084_1	isoform a	7.1e-18	0	2	2	-0.566881	13.3526	-12.7581	3.89498e-06	0.000181878	4.03749
0	3497088_4	isoform a	6.7e-88	F:specific transcriptional repressor activity; P:mesodermal cell fate determination; P:dorsal/ventral pattern formation, imaginal disc; P:negative regulation of transcription from RNA polymerase II promoter; F:zinc ion binding; P:establishment or maintenance of cell polarity; C:filamentous actin; P:dendrite morphogenesis; P:muscle organ development; P:Malpighian tubule morphogenesis; P:cuticle pa…	2	2	0.120945	6.83808	2.61433	0.0344071	0.608269	-6.03568
0	3497091_1	ubiquitin thioesterase otub1	1.34e-56	F:ubiquitin-specific protease activity; P:protein K48-linked deubiquitination; F:NEDD8-specific protease activity; F:ubiquitin binding	2	2	-0.0760951	6.90905	-1.41457	0.199713	1	-7.75834
0	3497091_2	otu ubiquitin aldehyde binding 1	2.58e-10	F:ubiquitin-specific protease activity; P:protein K48-linked deubiquitination; F:NEDD8-specific protease activity; F:ubiquitin binding	2	2	-1.24981	8.57203	-23.7318	5.33166e-08	5.56509e-06	8.8686
0	3497100_2	survival of motor neuron-related-splicing factor 30	6.29e-11	C:Cajal body; P:mRNA processing; P:induction of apoptosis; C:nucleus; P:RNA splicing; P:apoptosis; F:nucleic acid binding; C:cytoplasm; F:RNA binding; P:RNA splicing, via transesterification reactions; C:spliceosomal complex; F:protein binding; C:nuclear speck	2	2	-0.0327322	7.32427	-0.448577	0.66717	1	-8.65046
0	3497115_1	dna-binding horma domain-containing protein	8.04e-24	P:mitotic cell cycle spindle assembly checkpoint; C:cytosol; C:nuclear pore; C:kinetochore; F:DNA binding; P:mitotic sister chromatid segregation; C:spindle pole body; C:perinuclear region of cytoplasm; P:anaphase-promoting complex-dependent proteasomal ubiquitin-dependent protein catabolic process; F:protein homodimerization activity; P:negative regulation of ubiquitin-protein ligase activity du…	1	1	0.321138	7.79797	4.3957	0.00310223	0.0660034	-3.45229
0	3497129_1	tripartite motif-containing 2	1.15e-11	F:metal ion binding; F:myosin binding; C:cytoplasm; P:P; F:zinc ion binding; F:protein binding; C:intracellular	2	2	-0.785014	7.39302	-11.8285	6.50783e-06	0.000282635	3.45763
0	3497130_1	arsenite-resistance protein	3.38e-27	P:conversion of ds siRNA to ss siRNA involved in RNA interference; C:precatalytic spliceosome; P:primary microRNA processing; P:response to arsenic; P:negative regulation of viral genome replication; P:nuclear mRNA splicing, via spliceosome; C:catalytic step 2 spliceosome; C:nucleoplasm	2	2	1.38598	11.3784	27.3905	1.95465e-08	2.61624e-06	9.98768
0	3497130_2	arsenite-resistance protein	1.29e-41	P:conversion of ds siRNA to ss siRNA involved in RNA interference; C:precatalytic spliceosome; P:primary microRNA processing; P:negative regulation of viral genome replication; P:nuclear mRNA splicing, via spliceosome; C:catalytic step 2 spliceosome; C:nucleoplasm	2	2	0.363026	6.95272	5.97865	0.000534477	0.0132722	-1.50307
0	3497138_1	histone 1	3.3e-20	C:nucleosome; F:DNA binding; P:nucleosome assembly; C:nucleus	2	2	4.92491	9.79609	84.9363	6.75324e-12	1.82352e-08	18.3016
0	3497143_1	GH16383 [Drosophila grimshawi]	3.26e-05	F:chitin binding; P:chitin metabolic process; C:extracellular region	2	2	0.557274	8.053	11.2023	9.39366e-06	0.000388152	3.04305
0	3497147_1	dead (asp-glu-ala-asp) box polypeptide 47	1.27e-137	C:nucleolus; F:helicase activity; F:nucleic acid binding; F:nucleotide binding	2	2	0.785509	8.66052	15.9644	8.37888e-07	5.11169e-05	5.7723
0	3497148_3	26s protease regulatory subunit 6b	0	C:cytoplasm; P:auxin biosynthetic process; P:protein folding; F:endopeptidase activity; C:proteasome regulatory particle, base subcomplex; F:ATPase activity; F:protein binding; P:protein catabolic process; F:ATP binding; P:proteolysis; P:response to DNA damage stimulus; C:male germ cell nucleus	2	2	0.0873988	10.5947	1.92666	0.0950002	1	-7.0614
0	3497150_1	chitin-binding domain-containing protein	1.15e-14	C:extracellular region; P:proteolysis; F:zinc ion binding; F:metallopeptidase activity	2	2	-6.86851	11.7539	-62.9254	5.60944e-11	5.0489e-08	16.2596
0	3497153_1	sp1070 cg9138-pa	0	P:regulation of tube architecture, open tracheal system; C:apical plasma membrane; F:Notch binding	2	2	0.249194	6.8181	3.99329	0.00513466	0.104759	-4.0039
0	3497154_1	nucleolar protein	2.13e-13	C:mitochondrion	2	2	-0.40718	11.5275	-8.57094	5.54383e-05	0.00179136	1.03997
0	3497160_2	isoform a	2.11e-33	F:nucleic acid binding; C:intracellular organelle	2	2	0.258141	7.33188	3.11299	0.0168067	0.313566	-5.28247
0	3497167_1	dna-directed rna polymerase i subunit rpa2	7.07e-146	F:DNA-directed RNA polymerase activity; P:rRNA transcription; P:nucleologenesis; P:embryo implantation; C:DNA-directed RNA polymerase I complex; P:embryonic development; F:protein binding; C:nucleoplasm	2	2	2.01575	9.7497	21.8207	9.5811e-08	8.89438e-06	8.21222
0	3497171_1	transcription elongation factor b polypeptide 1	1.92e-53	C:cytosol; F:translation elongation factor activity; P:ubiquitin-dependent protein catabolic process; P:regulation of transcription from RNA polymerase II promoter; F:ubiquitin-protein ligase activity; F:protein binding; F:transcription elongation regulator activity; P:interspecies interaction between organisms; C:nucleoplasm; C:VCB complex; F:RNA polymerase II transcription factor activity	2	2	0.964191	8.95687	16.0964	7.91628e-07	4.86291e-05	5.83636
0	3497172_4	ribosome biogenesis protein nsa2 homolog	3.34e-65	C:ribosome; C:nucleus	2	2	0.297688	9.17335	6.52189	0.000314494	0.0082726	-0.910179
0	3497175_1	rtx toxin	1.3e-19	C:cell wall; P:cell adhesion; C:cell surface; C:membrane; F:protein binding	2	2	0.13803	8.56992	2.19946	0.063425	1	-6.66093
0	3497179_1	alanyl-trna synthetase	4.78e-16	F:aminoacyl-tRNA ligase activity; F:nucleic acid binding; P:translation; P:tRNA aminoacylation	2	2	-0.200584	12.2198	-5.12699	0.00131957	0.0298877	-2.50868
0	3497180_3	myelinprotein expression factor	6.98e-60	F:nucleic acid binding; F:nucleotide binding; C:ribonucleoprotein complex	2	2	0.41065	7.19571	6.61079	0.00028926	0.00768042	-0.816519
0	3497183_3	structural maintenance of chromosomes smc3	1.11e-71	P:wing disc dorsal/ventral pattern formation; P:RNA interference; P:oocyte microtubule cytoskeleton polarization; P:regulation of cell shape; F:neuropeptide hormone activity; P:regulation of heart contraction; P:actin polymerization or depolymerization; P:neuropeptide signaling pathway; F:myostimulatory hormone activity; C:RNA-induced silencing complex; F:diuretic hormone activity; P:rhabdomere d…	2	2	0.0103713	7.58757	0.160926	0.876656	1	-8.74893
0	3497185_2	calponin acidic	4.13e-73	F:microtubule binding; C:protein complex; C:dendritic spine; C:neuronal cell body; P:regulation of blood vessel endothelial cell migration; P:regulation of MAPKKK cascade; C:postsynaptic density	2	2	-1.09569	8.30556	-20.1569	1.66491e-07	1.40297e-05	7.59198
0	3497187_1	was protein family homolog 1	1.81e-12	C:early endosome; C:recycling endosome; F:cytoskeletal protein binding; P:endosome transport; C:cell projection	2	2	0.0117936	6.58268	0.228196	0.825956	1	-8.73407
0	3497187_2	actin nucleation promoting factor	1.5e-15	C:endosome; F:protein binding; P:transport; P:cellular process	2	2	0.0227019	6.46271	0.564254	0.590034	1	-8.58598
0	3497189_1	histidine triad protein member	5.34e-06	0	2	2	-0.0158757	6.97232	-0.346544	0.739025	1	-8.69573
0	3497196_2	niemann-pick type c2	2.25e-09	P:intracellular cholesterol transport; F:cholesterol binding; P:glycolipid transport; P:intracellular sterol transport; F:enzyme binding; C:lysosome; P:phospholipid transport; P:cholesterol efflux; C:extracellular region; P:cholesterol homeostasis; P:cholesterol transport; P:response to virus; P:regulation of isoprenoid metabolic process	2	2	0.435273	8.50199	10.0144	1.98899e-05	0.000745031	2.196
0	3497197_2	histone h1 gamma-like	8.91e-15	C:nucleosome; F:DNA binding; P:nucleosome assembly; C:nucleus	2	2	2.84963	11.8342	28.6167	1.43794e-08	2.14256e-06	10.3286
0	3497201_1	ligase i	4.37e-44	P:auxin biosynthetic process; P:DNA replication; F:metal ion binding; F:DNA binding; P:cell cycle; F:ATP binding; C:nucleus; F:DNA ligase (ATP) activity; P:DNA recombination; P:cell division; P:DNA repair	2	2	1.22931	8.19727	24.1528	4.71493e-08	5.03994e-06	9.00604
0	3497201_2	dna ligase 1	3.92e-129	P:auxin biosynthetic process; P:cell cycle; C:integral to membrane; F:metal ion binding; F:DNA ligase (ATP) activity; P:DNA replication; P:cell division; P:nucleotide-excision repair, DNA gap filling; F:DNA binding; F:ATP binding; F:protein binding; P:V(D)J recombination; P:anatomical structure morphogenesis; C:nucleoplasm	2	2	-0.143146	7.27718	-2.61706	0.0342704	0.606025	-6.03155
0	3497202_1	general transcription factor polypeptide 5	2.33e-14	F:RNA polymerase III transcription factor activity; P:tRNA transcription from RNA polymerase III promoter; F:DNA binding; F:protein binding; P:5S class rRNA transcription; C:transcription factor TFIIIC complex	2	2	0.105213	6.98404	1.82374	0.110561	1	-7.20842
0	3497202_2	general transcription factor 3c polypeptide 5 (transcription factor iiic-epsilon subunit) (tf3c-epsilon) (tfiiic 63 kda subunit)	2.5e-11	P:transcription, DNA-dependent; F:binding; C:nucleus	2	2	-0.951133	8.34763	-13.5516	2.58125e-06	0.000129385	4.5022
0	3497206_1	ns1 binding protein	1.68e-119	P:multi-organism process; C:nucleoplasm; P:gene expression; P:RNA metabolic process; C:macromolecular complex	2	2	2.95645	9.29111	36.6221	2.54291e-09	6.58031e-07	12.236
0	3497208_2	dna-directed rna polymerase ii subunit rpb3	2.16e-106	F:DNA-directed RNA polymerase activity; F:protein kinase activity; P:transcription initiation from RNA polymerase II promoter; P:RNA splicing; C:DNA-directed RNA polymerase II, core complex; F:DNA binding; F:protein dimerization activity; P:RNA elongation from RNA polymerase II promoter; C:cytoplasm	2	2	-0.832451	10.7836	-12.2501	5.13332e-06	0.000229852	3.72564
0	3497213_2	mitochondrial ribosomal protein l17	2.89e-46	P:mitotic spindle elongation; C:large ribosomal subunit	2	2	0.507974	7.22124	8.83821	4.53673e-05	0.0015059	1.26588
0	3497216_2	ubx domain-containing protein 7	3.68e-35	F:protein binding	2	2	0.468724	7.94794	10.9794	1.07525e-05	0.000435321	2.89047
0	3497217_2	cg10277- isoform a	6.03e-11	F:F; C:C	2	2	-0.681601	7.6256	-9.50124	2.81913e-05	0.0010068	1.8024
0	3497218_1	transposable element tc3	9.34e-26	P:cellular macromolecule metabolic process; F:DNA binding; P:nucleic acid metabolic process	2	2	1.63484	7.73523	18.3181	3.23619e-07	2.39551e-05	6.84445
0	3497220_1	spermine synthase	1.6e-76	F:transferase activity	2	2	0.0850239	7.05093	1.7193	0.128846	1	-7.35459
0	3497223_4	reverse transcriptase	7.71e-06	F:RNA binding; P:RNA-dependent DNA replication; F:endonuclease activity; F:RNA-directed DNA polymerase activity	2	2	0.0946334	7.56766	1.69385	0.13372	1	-7.38969
0	3497223_5	transposase	8.94e-14	F:RNA binding; P:RNA-dependent DNA replication; F:endonuclease activity; F:RNA-directed DNA polymerase activity	2	2	0.116594	6.62013	2.55654	0.0374445	0.656546	-6.12329
0	3497228_1	cv028_danre ame: full=upf0027 protein c22orf28 homolog	1.43e-88	F:F; P:P	2	2	-0.761545	9.13749	-8.99486	4.04344e-05	0.00137373	1.39565
0	3497228_2	conserved hypothetical protein [Pediculus humanus corporis]	3.53e-127	0	2	2	0.0499522	7.1393	0.808042	0.445413	1	-8.40733
0	3497230_1	armadillo repeat containing 6	2.73e-37	F:binding; F:protein binding	2	2	-0.151188	7.18854	-2.039	0.0804539	1	-6.89811
0	3497242_2	zinc finger ccch domain-containing protein 15	5.04e-58	F:metal ion binding; F:nucleic acid binding; F:protein binding; C:intracellular part	2	2	-0.518274	8.48809	-4.51608	0.00268072	0.0576276	-3.29172
0	3497246_1	protective antigen 4d8	2.19e-28	P:P; C:C	2	2	-0.101349	11.3913	-2.45825	0.0432626	0.749463	-6.27208
0	3497250_1	dendritic cell protein	6.5e-97	P:Golgi organization; C:Golgi apparatus; P:protein secretion; C:cytosol	2	2	-0.0650054	6.71395	-1.3306	0.224653	1	-7.86216
0	3497253_1	tetratricopeptide repeat domain 4	2.08e-64	F:binding; P:P; C:C	2	2	0.0948142	6.96846	1.894	0.0996924	1	-7.10834
0	3497255_1	neurotransmitter gated ion channel	8.68e-39	C:membrane	2	2	-0.0525336	7.19279	-1.05467	0.326296	1	-8.17423
0	3497260_1	elongation factor tu (ef-tu)	4.61e-25	F:binding; C:intracellular	2	2	-0.869637	8.63531	-5.93724	0.000557306	0.0137456	-1.54975
0	3497261_1	zinc finger protein 202	7.13e-09	F:nucleic acid binding; C:intracellular; P:transcription; F:zinc ion binding	2	2	-0.0941866	8.17933	-1.76133	0.121165	1	-7.29617
0	3497264_1	cat eye syndrome chromosome candidate 5 homolog	4.94e-15	F:hydrolase activity; P:metabolic process	2	2	-1.85164	9.5979	-42.2512	9.29672e-10	3.12093e-07	13.3264
0	3497264_2	cat eye syndrome chromosome candidate 5 isoform 2 precursor	1.67e-59	C:mitochondrion; P:metabolic process; F:hydrolase activity; C:C	2	2	-0.204907	7.11669	-4.37364	0.00318712	0.0676704	-3.48194
0	3497267_3	pdgf associated protein	9.02e-06	F:platelet-derived growth factor binding; F:F; P:platelet-derived growth factor receptor signaling pathway; P:cell proliferation; P:signal transduction; C:C	2	2	0.516495	9.85089	7.00458	0.000201699	0.00554515	-0.412334
0	3497267_4	pdgf associated protein	6.55e-06	F:platelet-derived growth factor binding; F:F; P:platelet-derived growth factor receptor signaling pathway; P:cell proliferation; P:signal transduction; C:C	1	1	0.103277	8.04821	0.532918	0.610433	1	-8.6048
0	3497270_1	wd repeat-containing protein 3	6.57e-102	C:nucleus; C:nucleolus	2	2	1.18249	8.99791	8.42553	6.19655e-05	0.00197555	0.914581
0	3497271_1	transcription elongation regulator 1	5.49e-73	F:protein binding	2	2	1.3249	8.67265	18.1622	3.43378e-07	2.52331e-05	6.77772
0	3497272_1	mitochondrial ribosomal protein s21	5.48e-23	C:mitochondrial small ribosomal subunit; F:structural constituent of ribosome; P:translation	2	2	-0.211331	10.1469	-2.14476	0.0687823	1	-6.74223
0	3497275_1	atp-dependent transporter	6.06e-22	P:auxin biosynthetic process; F:ATPase activity, coupled to transmembrane movement of substances; F:ATP binding	3	3	-0.625475	11.9156	-13.0407	3.35523e-06	0.000160413	4.20599
0	3497280_2	lem domain containing 3	3.41e-21	P:negative regulation of transmembrane receptor protein serine/threonine kinase signaling pathway; F:binding; C:nuclear envelope; C:membrane	2	2	-1.17858	10.0851	-20.1784	1.65261e-07	1.39607e-05	7.60032
0	3497293_1	dr1-associated corepressor	3.7e-21	P:negative regulation of transcription from RNA polymerase II promoter; F:transcription corepressor activity; F:transcription factor activity; C:nucleus	2	2	-0.357781	11.2722	-5.23263	0.00117356	0.0267956	-2.37861
0	3497293_2	dr1-associated corepressor	1.53e-09	F:sequence-specific DNA binding; P:P; F:DNA binding; C:intracellular; C:nucleus	2	2	0.439802	7.25329	6.02305	0.000511149	0.0127592	-1.45325
0	3497296_1	selenoprotein t	2.23e-48	F:selenium binding; P:cell redox homeostasis	2	2	-0.139669	8.31528	-2.80373	0.0261289	0.471588	-5.74858
0	3497304_2	hypothetical protein TcasGA2_TC006646 [Tribolium castaneum]	4.48e-05	0	2	2	0.0446384	6.68448	1.00026	0.350201	1	-8.22974
0	3497305_2	luciferin-regenerating enzyme	9.37e-28	P:regulation of calcium-mediated signaling; P:positive regulation of ATPase activity; C:cytoplasm; F:calcium ion binding; F:enzyme regulator activity; P:cellular calcium ion homeostasis; C:nucleus	2	2	-2.25266	8.49598	-35.1284	3.40803e-09	7.81132e-07	11.9159
0	3497307_1	squamous cell carcinoma antigen recognized by t-cells 3	3.23e-49	F:binding	2	2	1.69036	9.18663	26.1668	2.69225e-08	3.39153e-06	9.63135
0	3497307_2	squamous cell carcinoma antigen recognized by t-cells 3	1.27e-18	P:cellular process; F:binding; C:intracellular; P:organ development	2	2	0.132445	6.82638	2.44921	0.0438423	0.758236	-6.28575
0	3497310_1	mitochondrial ribosomal	1.04e-18	F:structural constituent of ribosome; C:mitochondrion; P:translation; C:ribosome	2	2	0.117889	6.82875	2.89742	0.022833	0.417439	-5.60685
0	3497310_2	mitochondrial ribosomal	3.57e-10	F:structural constituent of ribosome; C:mitochondrion; P:translation; C:ribosome	1	1	-0.3798	8.36713	-3.54413	0.00927276	0.180698	-4.64523
0	3497312_3	carbohydrate sulfotransferase	6.36e-15	F:transferase activity; F:sulfotransferase activity	2	2	-4.7164	9.56518	-74.211	1.75129e-11	2.50905e-08	17.4059
0	3497315_1	ccr4-not transcription subunit 2	7.15e-85	C:cytoplasm; F:protein binding; F:RNA polymerase II transcription mediator activity; C:nucleus; P:regulation of transcription from RNA polymerase II promoter, global	2	2	-1.01728	10.5575	-15.8861	8.66803e-07	5.23156e-05	5.73403
0	3497319_1	nucleoporin 214kda	1.34e-16	P:cellular process; P:transport; P:macromolecule localization	2	2	0.105841	6.67621	2.50167	0.0405851	0.706042	-6.20639
0	3497319_2	nucleoporin 214kda	5.29e-09	P:nuclear export; P:protein targeting; C:intracellular part; P:mRNA transport	2	2	0.0506759	6.77471	0.763626	0.469814	1	-8.44396
0	3497320_2	alternative splicing type 3	6.3e-35	F:F; P:P	2	2	-0.322962	8.16882	-6.2125	0.000423629	0.0107561	-1.24344
0	3497329_1	peptidyl-prolyl cis-trans isomerase	1.54e-69	P:protein folding; F:peptidyl-prolyl cis-trans isomerase activity; C:lipid particle	2	2	0.554146	12.046	9.59114	2.64891e-05	0.000955345	1.87267
0	3497329_2	peptidyl-prolyl cis-trans isomerase	2.2e-68	P:protein folding; F:peptidyl-prolyl cis-trans isomerase activity; C:lipid particle	2	2	0.244233	11.7452	3.35012	0.0120796	0.231188	-4.92971
0	3497334_2	ul36	3.96e-06	C:extrachromosomal circular DNA	2	2	-0.314101	7.25106	-5.36693	0.00101324	0.0234715	-2.21548
0	3497336_3	protein mida mitochondrial precursor	1.09e-45	C:mitochondrion; F:F; P:P	2	2	0.0785631	7.34867	1.28058	0.240771	1	-7.9222
0	3497337_1	cg2446-pa	3.72e-63	P:wing disc development; P:compound eye development; C:nucleus; P:bristle development	2	2	0.415453	8.39168	7.35638	0.000148082	0.00418788	-0.065428
0	3497345_1	chromosome 6 open reading frame 168	2.86e-46	0	2	2	-0.276263	7.1703	-2.33499	0.0518934	0.88152	-6.45799
0	3497351_3	isoform e	4.54e-27	0	2	2	0.0229407	6.68758	0.469048	0.653163	1	-8.64005
0	3497356_1	innexin 2	4.57e-100	C:gap junction; P:morphogenesis of embryonic epithelium; P:olfactory behavior; P:foregut morphogenesis	2	2	0.0547178	7.52701	0.741183	0.482482	1	-8.4618
0	3497357_3	fumarylacetoacetate hydrolase	8.91e-86	F:fumarylacetoacetase activity; F:metal ion binding; P:tyrosine catabolic process; P:arginine catabolic process; C:cytosol; P:L-phenylalanine catabolic process	2	2	1.48751	7.66067	23.5309	5.65794e-08	5.83089e-06	8.80217
0	3497358_1	isoform a	8.02e-68	P:protein K11-linked ubiquitination; P:exit from mitosis; P:cell division; P:anaphase-promoting complex-dependent proteasomal ubiquitin-dependent protein catabolic process; F:ubiquitin-protein ligase activity; F:ATP binding; P:free ubiquitin chain polymerization; P:activation of anaphase-promoting complex activity; C:anaphase-promoting complex	2	2	-1.85357	8.04723	-13.4394	2.73211e-06	0.000135417	4.43805
0	3497360_1	calmodulin	1.07e-53	F:oxidoreductase activity; F:binding	2	2	-0.0619709	6.72066	-1.04227	0.331627	1	-8.18707
0	3497363_2	low molecular weight phosphotyrosine protein phosphatase	6.87e-39	F:phosphatase activity	2	2	-0.0206125	8.07457	-0.411459	0.69293	1	-8.66821
0	3497370_1	ubiquitin-conjugating enzyme e2d 3 (ubc4 5 yeast) isoform cra_a	5.46e-79	P:cyclin catabolic process; P:determination of adult lifespan; P:embryonic development ending in birth or egg hatching; P:regulation of R7 cell differentiation; P:growth; P:regulation of protein stability; P:female germ-line stem cell division; P:regulation of protein metabolic process; P:locomotion; P:chromosome organization; P:mitosis; F:ubiquitin protein ligase binding; F:ubiquitin-protein lig…	2	2	0.874211	7.91998	15.9133	8.56636e-07	5.19037e-05	5.74734
0	3497373_1	rwd domain-containing protein	3.22e-07	F:receptor activity	2	2	0.9905	8.20319	7.66342	0.000114152	0.00335513	0.227031
0	3497374_1	crustin p	2.76e-08	F:peptidase inhibitor activity; C:extracellular region	2	2	0.21731	6.84294	4.35934	0.00324352	0.0687269	-3.5012
0	3497377_1	heat shock factor-binding protein 1	1.75e-20	P:response to stress	2	2	-1.05868	7.85358	-8.63202	5.29312e-05	0.00171929	1.09211
0	3497382_1	transmembrane protein 195	5.19e-51	F:iron ion binding; P:fatty acid biosynthetic process; C:integral to membrane; C:membrane; F:F; P:oxidation reduction; F:oxidoreductase activity; C:C; C:endoplasmic reticulum; P:P	2	2	0.542146	7.00254	6.31286	0.000384159	0.00987916	-1.13409
0	3497384_3	nuclear receptor coactivator 5-like	3.52e-33	P:cellular macromolecule metabolic process; C:precatalytic spliceosome; P:gene expression; P:primary metabolic process	2	2	-0.0351188	6.21549	-0.461953	0.658001	1	-8.64371
0	3497387_1	elongation factor tu gtp binding domain containing 2	0	P:RNA splicing; F:translation elongation factor activity; C:Cajal body; F:GTP binding; C:spliceosomal complex; F:protein binding; C:nuclear speck; P:mRNA processing; F:GTPase activity	2	2	-0.270889	10.7288	-6.36067	0.000366817	0.0094882	-1.08242
0	3497388_1	vasodilator-stimulated phosphoprotein	8.11e-10	0	2	2	-0.336471	7.3731	-4.12504	0.00434208	0.0898881	-3.82081
0	3497388_2	enabled homolog	4.45e-45	P:axon guidance; C:filopodium; C:cytosol; C:synapse; P:actin polymerization or depolymerization; C:stress fiber; C:focal adhesion; F:actin binding; P:intracellular transport; C:lamellipodium; F:WW domain binding; F:profilin binding; F:SH3 domain binding; P:neural tube closure	2	2	-0.0811933	6.87981	-1.56045	0.162222	1	-7.56983
0	3497393_2	bystin family protein	1.1e-20	C:nucleus	2	2	-0.727972	11.678	-17.954	3.71951e-07	2.67217e-05	6.68771
0	3497393_3	bystin	2.34e-66	P:ribosome biogenesis; C:nucleus; C:nucleolus	2	2	0.293866	7.68095	6.43398	0.000341903	0.00891805	-1.00372
0	3497396_2	glutaredoxin 5	1.8e-39	P:hemopoiesis; F:metal ion binding; F:electron carrier activity; P:cell redox homeostasis; F:2 iron, 2 sulfur cluster binding; F:protein disulfide oxidoreductase activity; C:mitochondrion	2	2	-0.554932	11.0062	-13.7367	2.35258e-06	0.000120154	4.60696
0	3497398_1	x-prolyl aminopeptidase (aminopeptidase p) soluble	1.58e-51	F:metal ion binding; F:metalloexopeptidase activity; F:aminopeptidase activity; P:cellular process; P:proteolysis; C:cytosol	2	2	1.88926	7.8632	22.5856	7.53389e-08	7.31081e-06	8.48163
0	3497400_1	carboxypeptidase isoform cra_a	1.18e-29	C:soluble fraction; F:metal ion binding; F:metallocarboxypeptidase activity; P:proteolysis; P:histone acetylation	2	2	2.12911	8.15981	8.58055	5.50352e-05	0.00178105	1.04819
0	3497403_1	si:ch211- protein	2e-15	0	1	1	3.97543	9.56447	46.7589	4.55223e-10	1.9633e-07	14.0898
0	3497404_2	zinc finger protein 271 (zinc finger protein 7) (zinc finger protein znfphex133) (epstein-barr virus-induced zinc finger protein) (znf-eb) (ct-zfp48) (zinc finger protein dp) (znf-dp)	2.17e-59	C:nucleolus	2	2	-0.638484	7.35811	-6.87798	0.000226095	0.00614512	-0.540401
0	3497408_2	hit zinc finger family protein	2.93e-27	0	2	2	-0.103599	7.5279	-2.02345	0.0823277	1	-6.92086
0	3497412_3	lethal giant discs 1	1.08e-16	C:cytoplasm; P:compound eye development; P:intracellular protein transport; P:negative regulation of Notch signaling pathway; P:imaginal disc-derived wing vein morphogenesis	2	2	0.139033	6.94694	2.95359	0.0210694	0.386791	-5.52206
0	3497413_1	transmembrane protein 209	1.29e-26	C:integral to membrane; C:membrane	2	2	-1.30202	9.13555	-7.19075	0.000171017	0.00477348	-0.227139
0	3497415_1	ribosomal protein s6	1.06e-91	P:activation-induced cell death of T cells; P:T cell proliferation during immune response; P:gastrulation; F:protein binding; C:polysome; P:ribosomal small subunit assembly; P:erythrocyte development; P:translational elongation; P:placenta development; C:nucleolus; P:G1/S transition checkpoint; P:oogenesis stage; P:mitosis; P:T cell differentiation in the thymus; P:G1/S transition of mitotic cell…	2	2	3.15378	12.5199	41.6822	1.02281e-09	3.32573e-07	13.2236
0	3497417_1	endonuclease reverse transcriptase	1.87e-37	F:RNA binding; P:RNA-dependent DNA replication; F:endonuclease activity; F:RNA-directed DNA polymerase activity	2	2	0.0367706	6.78415	0.912381	0.391632	1	-8.31464
0	3497433_1	inosine-uridine preferring nucleoside hydrolase	9.64e-39	F:purine nucleosidase activity; P:metabolic process; F:hydrolase activity; F:hydrolase activity, acting on glycosyl bonds; C:C	2	2	-2.52878	9.21143	-10.2712	1.68026e-05	0.000643357	2.38641
0	3497434_1	apolipoprotein d	1.55e-33	F:retinoid binding; F:lipid binding; F:binding; F:transporter activity; P:transport	2	2	-1.26375	9.08174	-5.65989	0.000741515	0.0177395	-1.86815
0	3497435_1	mitochondrial 28s ribosomal protein	3.18e-35	P:reproduction; P:receptor-mediated endocytosis; P:nematode larval development; C:ribosome; P:growth	2	2	-0.421057	9.43847	-9.91034	2.13203e-05	0.000790033	2.11762
0	3497446_1	heat shock protein	1.02e-62	P:response to heat	2	2	0.934864	7.2454	16.5089	6.64739e-07	4.19976e-05	6.03338
0	3497446_3	heat shock protein	2.2e-64	P:response to heat	2	2	0.0690304	6.41779	1.35467	0.217236	1	-7.83277
0	3497448_1	hnrnpl protein	1.28e-41	P:RNA splicing; C:pronucleus; F:RNA binding; F:protein binding; P:axon guidance; P:adult feeding behavior; C:ribonucleoprotein complex	2	2	0.931065	8.43314	8.47181	5.97982e-05	0.00191635	0.954684
0	3497448_2	isoform g	4.39e-40	F:mRNA binding; P:axon guidance; P:mRNA processing; P:adult feeding behavior; C:nucleus; F:nucleotide binding	2	2	0.429105	10.8472	9.49026	2.84075e-05	0.00101335	1.79379
0	3497450_1	hematopoietic signal peptide-containing precursor	3.74e-21	F:F; C:integral to membrane; C:membrane; P:P; C:extracellular region; C:C	2	2	-0.188403	8.86981	-4.47339	0.00282252	0.0605082	-3.34842
0	3497452_1	mariner transposase	1.5e-05	0	2	2	0.274898	10.7046	5.71618	0.000699216	0.0168118	-1.80272
0	3497453_2	cdna sequence bc003266	3.81e-11	F:F; C:integral to membrane; C:membrane; P:P	2	2	-0.178937	7.46203	-2.34482	0.0511448	0.870709	-6.44321
0	3497454_1	mitochondrial ribosomal	2.44e-26	F:structural constituent of ribosome; P:translation; C:ribosome; C:intracellular	2	2	-1.35052	10.1106	-13.1594	3.15423e-06	0.000153642	4.27577
0	3497455_2	pol-like protein	5.71e-38	F:nucleic acid binding; F:RNA binding; F:nucleotidyltransferase activity; F:transferase activity; F:ribonuclease H activity; P:RNA-dependent DNA replication; F:zinc ion binding; F:RNA-directed DNA polymerase activity	2	2	0.331519	8.15865	7.95358	8.99499e-05	0.00273438	0.495034
0	3497458_1	aconitase cg9244-pb	1.69e-14	P:citrate metabolic process; F:iron ion binding; P:tricarboxylic acid cycle; F:4 iron, 4 sulfur cluster binding; F:aconitate hydratase activity; C:mitochondrion	2	2	0.772428	11.9203	15.1279	1.21389e-06	6.93548e-05	5.35402
0	3497462_1	cathepsin l-like cysteine proteinase	1.22e-18	C:yolk granule; P:protein metabolic process; C:vesicle lumen; F:protein binding; P:positive regulation of growth rate; P:locomotion; P:embryonic development ending in birth or egg hatching; P:collagen catabolic process; C:extracellular region; F:cysteine-type peptidase activity	2	2	-0.37998	11.5409	-8.37825	6.42712e-05	0.00204067	0.873434
0	3497475_2	hypothetical protein BRAFLDRAFT_94091 [Branchiostoma floridae]	8.65e-08	C:spindle pole; P:microtubule cytoskeleton organization; C:microtubule organizing center	2	2	-0.183729	7.01312	-3.62155	0.00835676	0.164395	-4.53289
0	3497478_1	transposase	1.86e-08	P:DNA metabolic process	2	2	0.297271	7.01104	5.60322	0.000786996	0.0186622	-1.93444
0	3497479_1	small vcp p97-interacting protein	4.51e-08	P:P; C:C	2	2	-0.403881	8.04937	-9.72286	2.42011e-05	0.000883083	1.9746
0	3497480_1	reverse transcriptase	1.01e-29	F:RNA binding; P:DNA repair; P:RNA-dependent DNA replication; F:nuclease activity; C:intracellular; F:RNA-directed DNA polymerase activity	2	2	0.0327048	7.05895	0.6828	0.516487	1	-8.50606
0	3497483_1	gamma glutamyl transpeptidases	5.36e-112	F:gamma-glutamyltransferase activity	2	2	-0.0759531	6.98395	-1.32694	0.225798	1	-7.8666
0	3497484_1	alkaline phosphatase	5.71e-61	F:hydrolase activity	2	2	1.08967	7.47545	14.4756	1.64314e-06	8.91241e-05	5.01224
0	3497484_2	alkaline phosphatase	5.44e-45	F:alkaline phosphatase activity	2	2	0.881903	9.36238	6.92974	0.000215741	0.00589727	-0.487834
0	3497486_1	dead-box protein	9.99e-59	P:auxin biosynthetic process; F:ATP-dependent helicase activity; F:nucleic acid binding; F:ATP binding	2	2	-0.580994	11.3954	-13.1963	3.09451e-06	0.000151326	4.29736
0	3497486_2	dead box atp-dependent rna helicase	4.05e-160	F:binding; F:ATP-dependent helicase activity; P:spliceosome assembly; P:embryonic development via the syncytial blastoderm; P:ribosome biogenesis; P:regulation of translational initiation	2	2	0.234117	8.01915	2.04517	0.0797219	1	-6.88907
0	3497487_4	transmembrane emp24 domain-containing protein 2 precursor	1.42e-74	C:COPI coated vesicle membrane; C:microsome; C:ER-Golgi intermediate compartment; F:protein binding; P:vesicle targeting; P:intracellular protein transport; C:integral to membrane; C:zymogen granule membrane	2	2	-0.73415	7.889	-6.02171	0.000511837	0.0127712	-1.45475
0	3497489_3	enhancer of split mgamma	8.51e-40	P:transcription	2	2	0.715511	7.55188	15.0626	1.25055e-06	7.12525e-05	5.32044
0	3497494_1	surface antigen	0.000391	F:F; C:nucleosome; P:P; P:nucleosome assembly; F:DNA binding; C:C	2	2	-0.545476	8.03436	-5.39982	0.000977791	0.0227352	-2.17591
0	3497500_1	mitochondrial f0 atp synthase d	7.33e-40	F:hydrogen ion transmembrane transporter activity; C:lipid particle; P:proton transport	2	2	0.163794	11.2057	3.45634	0.0104445	0.20201	-4.77344
0	3497503_1	polymerase ii (dna directed) polypeptide k	1.18e-16	F:metal ion binding; F:DNA-directed RNA polymerase activity; F:DNA binding; P:transcription; C:nucleus	2	2	0.51592	7.91509	11.9789	5.97428e-06	0.000263144	3.55426
0	3497503_2	polymerase ii (dna directed) polypeptide k	3.46e-16	F:metal ion binding; F:DNA-directed RNA polymerase activity; F:DNA binding; P:transcription; C:nucleus	2	2	-0.00647326	10.1382	-0.139838	0.892691	1	-8.75254
0	3497504_3	isoform b	1.13e-119	C:integral to membrane; P:P	2	2	0.232223	7.20234	2.31241	0.053656	0.908233	-6.49194
0	3497506_1	cyclin k	7.11e-108	C:nucleus	2	2	0.194822	6.79589	4.03053	0.00489568	0.100345	-3.9519
0	3497512_1	pol-like protein	5.03e-22	F:nucleic acid binding; F:RNA binding; F:ribonuclease H activity; P:RNA-dependent DNA replication; F:zinc ion binding; F:RNA-directed DNA polymerase activity	2	2	-0.0836934	7.54427	-1.49728	0.177591	1	-7.65264
0	3497513_1	pdcd11 protein	3.22e-05	F:structural constituent of ribosome; P:mRNA processing; P:RNA processing; C:nucleus; P:translation; F:RNA binding; C:ribosome; P:mycelium development; C:intracellular; F:binding	2	2	2.12031	10.8208	31.544	7.25989e-09	1.29935e-06	11.0848
0	3497513_2	rrna biogenesis protein rrp5	9.02e-08	F:RNA binding; F:binding; P:mRNA processing; P:RNA processing; C:intracellular; C:nucleus	2	2	0.935385	7.52786	11.7482	6.81441e-06	0.000294303	3.40563
0	3497522_2	endonuclease reverse transcriptase	2.14e-12	F:RNA binding; P:RNA-dependent DNA replication; F:RNA-directed DNA polymerase activity	2	2	-0.212438	8.22451	-4.17933	0.00405534	0.0844306	-3.74607
0	3497525_1	collagen type iv alpha 1	0.000151	F:extracellular matrix structural constituent; P:angiogenesis; F:platelet-derived growth factor binding; C:collagen; P:epithelial cell differentiation; F:protein binding; C:extracellular region; C:collagen type IV	2	2	-0.00880356	6.68231	-0.138525	0.893691	1	-8.75274
0	3497527_1	mitogen-activated protein kinase organizer 1	5.14e-44	C:cytoplasm; C:spliceosomal complex; P:nuclear mRNA splicing, via spliceosome	2	2	-1.27187	13.1832	-21.7457	9.81392e-08	9.04293e-06	8.1853
0	3497534_2	isoform b	9.19e-13	P:primary metabolic process; P:regulation of tube architecture, open tracheal system; P:amine metabolic process	2	2	-6.88918	12.5324	-96.2751	2.78778e-12	1.23668e-08	19.0919
0	3497538_1	protein	1.58e-28	C:integral to membrane; P:cell adhesion; P:G-protein coupled receptor protein signaling pathway	2	2	0.547821	7.67212	10.872	1.1486e-05	0.000462306	2.81594
0	3497539_1	hypothetical conserved protein	3.45e-10	0	2	2	0.0713641	6.98996	1.3504	0.218538	1	-7.83802
0	3497549_2	accessory gland protein	1.35e-56	P:translational initiation; F:translation initiation factor activity	2	2	0.436325	7.1421	9.38983	3.0475e-05	0.00107782	1.71454
0	3497561_1	transmembrane protein 80-like	6.3e-23	C:integral to membrane; C:membrane	2	2	-0.473462	10.5396	-11.7066	6.97987e-06	0.000300405	3.37853
0	3497562_2	sem1a_scham ame: full=semaphorin-1a ame: full=semaphorin-i short=sema i ame: full=fasciclin-4 ame: full=fasciclin iv flags: precursor	4.57e-07	P:nervous system development; P:cell differentiation; F:receptor activity; P:multicellular organismal development; C:integral to membrane; C:membrane	2	2	-0.631149	7.27767	-7.82642	9.97615e-05	0.00299453	0.378563
0	3497575_1	14 kda phosphohistidine phosphatase	1.8e-33	F:phosphatase activity; C:cytoplasm	2	2	-0.861765	11.4063	-15.5504	1.00422e-06	5.85058e-05	5.568
0	3497576_1	sil1 protein	1.45e-13	C:endoplasmic reticulum lumen; F:binding; C:endoplasmic reticulum; P:transmembrane transport; P:protein transport; P:transport	2	2	-0.131508	6.96474	-2.28344	0.0560061	0.943639	-6.5354
0	3497579_1	transmembrane protein 98	8.56e-28	C:endoplasmic reticulum	2	2	0.0995426	6.49218	2.43553	0.0447349	0.771309	-6.30642
0	3497580_1	serine threonine-protein kinase rio1 (rio kinase 1)	1.13e-46	F:kinase activity; F:ATP binding; F:catalytic activity; F:protein serine/threonine kinase activity	2	2	0.416062	8.43941	5.65572	0.000744761	0.0178034	-1.87301
0	3497580_2	serine threonine-protein kinase rio1	1.44e-25	C:cytosol; P:mitotic sister chromatid segregation; F:protein kinase activity; F:purine ribonucleotide binding; C:nucleus; P:regulation of mitotic cell cycle	2	2	0.540894	7.45908	7.70989	0.000109824	0.0032425	0.270489
0	3497582_1	serine threonine protein kinase	1.21e-46	F:binding; P:primary metabolic process; F:protein kinase activity; P:regulation of cellular metabolic process; P:phosphorylation; C:intracellular part	2	2	-0.780671	8.03982	-10.4794	1.46951e-05	0.000573264	2.53772
0	3497593_1	u1 small nuclear ribonucleoprotein a	7.14e-71	F:mRNA binding; F:U1 snRNA binding; C:protein complex; C:precatalytic spliceosome; C:U2 snRNP; P:regulation of alternative nuclear mRNA splicing, via spliceosome; C:U1 snRNP; C:U11 snRNP; P:female germ-line sex determination; F:protein binding; F:nucleotide binding; C:catalytic step 2 spliceosome; P:primary sex determination, soma; P:oogenesis	2	2	1.24328	11.2155	17.206	4.99429e-07	3.35319e-05	6.3557
0	3497596_1	rhomboid- isoform c	8.66e-19	F:serine-type endopeptidase activity; F:calcium ion binding; F:serine-type peptidase activity; C:integral to membrane; P:signal transduction; C:plasma membrane	2	2	0.118046	6.6603	2.30697	0.054089	0.913817	-6.50009
0	3497597_4	3-ketodihydrosphingosine reductase	3.24e-64	C:endoplasmic reticulum membrane; C:extracellular space; F:3-dehydrosphinganine reductase activity; F:binding; P:sphingolipid biosynthetic process; P:3-keto-sphinganine metabolic process	2	2	-1.21244	9.17254	-12.7011	4.01551e-06	0.000186246	4.00307
0	3497598_1	tpa: zinc finger protein	1.21e-05	F:zinc ion binding; C:intracellular	2	2	-1.44378	9.43023	-8.86682	4.44177e-05	0.00148269	1.28973
0	3497601_2	rwd domain-containing protein 1	6.41e-42	F:F; C:C	2	2	-0.228195	8.59496	-4.14533	0.00423241	0.0878228	-3.79283
0	3497606_1	big brother	4.26e-44	C:core-binding factor complex; P:positive regulation of transcription from RNA polymerase II promoter; F:protein heterodimerization activity; F:transcription coactivator activity	2	2	0.248278	7.34846	4.59435	0.00244069	0.0527965	-3.18843
0	3497608_1	sjogren syndrome antigen b (autoantigen la)	3.74e-53	C:cytoplasm; C:nucleolus; F:RNA binding; F:protein binding; P:RNA processing	2	2	0.73923	10.4927	16.7809	5.93771e-07	3.85331e-05	6.16067
0	3497609_1	ferritin 1	5.93e-19	0	2	2	0.619995	7.03679	12.104	5.56845e-06	0.000246555	3.63373
0	3497610_1	endonuclease-reverse transcriptase	3.01e-35	F:RNA binding; P:RNA-dependent DNA replication; F:RNA-directed DNA polymerase activity	1	1	-1.72862	10.8618	-33.8822	4.3931e-09	9.31164e-07	11.6376
0	3497612_1	brain protein 16	1.44e-47	F:F; F:binding; P:P; C:C	2	2	1.6905	8.42771	13.7855	2.2962e-06	0.000117467	4.63436
0	3497614_2	fatty acid binding protein	1.18e-43	P:transport; F:lipid binding; F:transporter activity	2	2	1.33328	13.4613	19.3863	2.18334e-07	1.72295e-05	7.28726
0	3497617_1	52 kda ro protein	0.000289	F:RNA binding; F:metal ion binding; C:cytoplasm; C:ribonucleoprotein complex; F:zinc ion binding; F:protein binding; F:DNA binding; C:intracellular	2	2	-2.83448	9.47522	-29.4054	1.1883e-08	1.84961e-06	10.54
0	3497618_3	dom-3 homolog z ( elegans)	7.74e-44	F:F; F:protein binding; F:identical protein binding; C:C	2	2	-4.04102	9.0874	-10.4775	1.47127e-05	0.000573593	2.53637
0	3497619_1	membrane-associated guanylate kinase	8.11e-98	P:central nervous system development; P:establishment or maintenance of epithelial cell apical/basal polarity; P:establishment or maintenance of neuroblast polarity; C:septate junction; C:cell-cell adherens junction; C:subapical complex; P:mitotic chromosome condensation; P:establishment or maintenance of polarity of embryonic epithelium; F:guanylate kinase activity; P:morphogenesis of a polarize…	2	2	-1.09526	7.79035	-18.4451	3.08472e-07	2.29708e-05	6.89841
0	3497628_1	gamma-interferon-inducible lysosomal thiol reductase precursor	6.57e-33	0	2	2	2.45595	11.6875	25.7059	3.04888e-08	3.61356e-06	9.4927
0	3497632_1	alkylated dna repair protein alkb homolog 6	6.4e-48	F:oxidoreductase activity; P:P; C:C	2	2	0.0240627	9.24151	0.264425	0.798999	1	-8.72398
0	3497639_1	hypothetical protein H28G03.4 [Caenorhabditis elegans]	1.04e-05	0	2	2	-0.238343	7.56357	-2.27666	0.0565707	0.952119	-6.54556
0	3497639_2	zeta (quinone reductase)	1.05e-48	C:cytoplasm; F:NADPH:quinone reductase activity; C:soluble fraction; F:NADP or NADPH binding; F:RNA binding; P:metabolic process	2	2	0.00700009	7.00576	0.107428	0.917436	1	-8.7571
0	3497641_1	reverse transcriptase	4.25e-11	F:RNA binding; P:DNA repair; P:RNA-dependent DNA replication; F:nuclease activity; C:intracellular; F:RNA-directed DNA polymerase activity	2	2	0.134067	6.71715	2.62078	0.0340843	0.603077	-6.0259
0	3497650_2	zinc c4h2 domain containing	3.11e-29	F:protein binding	2	2	0.0670936	6.48086	1.2438	0.253247	1	-7.96542
0	3497655_1	0	0	0	1	1	-2.04949	8.56902	-37.46	2.16883e-09	5.9337e-07	12.4094
0	3497658_4	tetraspanin 3	5.58e-32	F:F; C:integral to membrane; C:membrane; P:P	2	2	-2.53983	11.9085	-36.4393	2.63404e-09	6.76504e-07	12.1975
0	3497660_1	histone h1	5.21e-17	C:nucleosome; F:DNA binding; P:nucleosome assembly; C:nucleus	2	2	0.83427	14.6148	5.84446	0.000612531	0.014924	-1.65516
0	3497662_1	chromosome x open reading frame 34	1.42e-18	F:tRNA (uracil-5-)-methyltransferase activity; F:methyltransferase activity; F:transferase activity; P:tRNA processing; P:RNA processing; F:RNA methyltransferase activity; C:C	2	2	2.22811	8.86385	27.7453	1.78608e-08	2.4705e-06	10.0879
0	3497671_1	transposase homolog	8.28e-06	P:regulation of transcription, DNA-dependent; F:transposase activity; P:transcription initiation; P:DNA integration; P:transposition, DNA-mediated; F:sigma factor activity; F:transcription factor activity; F:DNA binding	2	2	0.0435158	6.67274	1.03025	0.33686	1	-8.19941
0	3497672_1	transcription factor sox-	5.57e-56	F:transcription regulator activity; P:gastrulation; P:regulation of transcription from RNA polymerase II promoter; F:DNA binding; P:nervous system development; C:nucleus	2	2	0.0436277	6.72994	0.690805	0.511735	1	-8.50018
0	3497673_1	conserved hypothetical protein [Culex quinquefasciatus]	8.68e-25	0	2	2	-0.872016	10.1459	-12.5896	4.26378e-06	0.000195859	3.9353
0	3497675_1	possible rna	2.52e-77	F:transferase activity	2	2	0.540477	7.88307	10.7337	1.25158e-05	0.000497946	2.71898
0	3497679_1	caseinolytic atp- proteolytic subunit homolog ( coli)	2.72e-86	F:identical protein binding; F:serine-type endopeptidase activity; P:protein homooligomerization; C:mitochondrial matrix; F:ATP binding; P:misfolded or incompletely synthesized protein catabolic process	2	2	-0.723686	8.80033	-13.3513	2.8575e-06	0.000141406	4.38736
0	3497681_3	glycoprotein 93	9.24e-80	P:protein folding; F:ATP binding; F:unfolded protein binding; P:response to stress; C:lipid particle	2	2	-1.00462	11.614	-19.0908	2.4292e-07	1.89054e-05	7.16724
0	3497685_3	zinc c2h2 type family protein	4.5e-06	P:regulation of transcription, DNA-dependent; F:metal ion binding; F:nucleic acid binding; F:zinc ion binding; F:protein binding; C:nucleus; C:intracellular	2	2	-0.201628	6.99382	-3.96972	0.0052924	0.107765	-4.03689
0	3497687_1	enhancer of rudimentary homolog	3.02e-48	P:regulation of transcription from RNA polymerase II promoter; P:cell cycle; P:pyrimidine nucleotide biosynthetic process; P:'de novo' pyrimidine base biosynthetic process	2	2	0.464495	7.11998	9.96879	2.0503e-05	0.000764262	2.16174
0	3497691_3	paired box protein pax-	4.74e-34	P:segment polarity determination; F:DNA binding; P:transcription	2	2	-0.115589	6.47253	-2.87523	0.0235717	0.429806	-5.64038
0	3497692_3	ruvbl1 protein	4.27e-19	P:cellular process; F:binding; P:regulation of biological process; F:hydrolase activity	2	2	0.0312526	6.79809	0.769252	0.466674	1	-8.43941
0	3497698_1	ccch zinc finger and smr domain protein	1.94e-12	F:zinc ion binding; F:nucleic acid binding	2	2	0.68139	7.50404	12.867	3.67604e-06	0.000173086	4.10284
0	3497703_1	trypsin	4.17e-64	F:peptidase activity	2	2	1.12775	7.36318	24.3962	4.39579e-08	4.74291e-06	9.08435
0	3497707_4	rna binding motif protein 39	4.15e-32	F:RNA binding; P:regulation of transcription; C:nuclear speck; P:RNA splicing; C:centrosome; F:nucleotide binding; P:mRNA processing; F:transcription coactivator activity	2	2	0.309533	7.81894	6.53025	0.00031202	0.0082145	-0.901339
0	3497710_1	der1-like domain member 1	9.74e-85	P:ER-associated protein catabolic process; C:integral to endoplasmic reticulum membrane; F:MHC class I protein binding; F:receptor activity; P:intracellular transport of viral proteins in host cell; P:endoplasmic reticulum unfolded protein response; P:retrograde protein transport, ER to cytosol	2	2	0.130501	11.058	3.23958	0.014077	0.265729	-5.09353
0	3497711_1	beta-n-acetylglucosaminidase	4.76e-86	F:beta-N-acetylhexosaminidase activity; F:cation binding; P:chitin catabolic process	2	2	1.25091	7.70379	6.28779	0.000393616	0.0100931	-1.16128
0	3497711_2	beta-n-acetylglucosaminidase	2.17e-96	F:beta-N-acetylhexosaminidase activity; P:chitin catabolic process	2	2	0.179416	6.63641	3.48489	0.0100468	0.194804	-4.73165
0	3497720_1	carboxypeptidase a4	5.35e-17	F:peptidase activity, acting on L-amino acid peptides	2	2	-0.43339	7.50772	-7.63374	0.000117017	0.0034296	0.199159
0	3497720_2	carboxypeptidase b1	5.91e-28	F:peptidase activity	2	2	0.110714	6.62436	1.70596	0.13138	1	-7.37303
0	3497723_1	protein transport protein sec23	1.52e-88	P:chitin-based larval cuticle pattern formation; P:protein transport; P:negative regulation of dendrite morphogenesis; P:Golgi organization; C:ER to Golgi transport vesicle; F:GTPase activator activity; C:Golgi stack; P:ER to Golgi vesicle-mediated transport; C:endoplasmic reticulum; F:binding	2	2	0.188515	6.82423	3.94939	0.00543275	0.110262	-4.06542
0	3497723_2	sec23a ( cerevisiae)	1.62e-69	C:cytosol; P:cartilage development; F:zinc ion binding; C:Golgi membrane; P:cellular membrane organization; F:protein binding; C:smooth endoplasmic reticulum membrane; C:COPII vesicle coat; P:ER to Golgi vesicle-mediated transport; C:perinuclear region of cytoplasm; P:intracellular protein transport; P:embryonic neurocranium morphogenesis	2	2	0.0751126	6.65531	1.6986	0.132797	1	-7.38316
0	3497724_1	catalase	0	P:UV protection; P:hydrogen peroxide catabolic process; F:aminoacylase activity; P:positive regulation of phosphoinositide 3-kinase cascade; F:heme binding; P:cholesterol metabolic process; F:NADP or NADPH binding; P:negative regulation of NF-kappaB transcription factor activity; F:catalase activity; P:response to copper ion; P:aerobic respiration; P:hemoglobin metabolic process; P:triglyceride m…	2	2	-2.71591	11.2748	-44.3523	6.60525e-10	2.51668e-07	13.693
0	3497725_1	hypothetical protein CHGG_05062 [Chaetomium globosum CBS 148.51]	1.91e-08	F:nucleic acid binding; F:F; P:P; C:C; F:DNA binding	2	2	0.0550525	6.76942	1.13858	0.292002	1	-8.08451
0	3497728_3	replication protein a1	4.72e-48	P:hemopoiesis; P:in utero embryonic development; P:positive regulation of cell proliferation; P:DNA-dependent DNA replication; P:nucleotide-excision repair, DNA gap filling; F:single-stranded DNA binding; C:DNA replication factor A complex; C:PML body; P:homeostasis of number of cells within a tissue; P:meiosis; C:actin cytoskeleton; P:nucleotide-excision repair, DNA damage removal; C:cytoplasm; …	2	2	-0.403851	10.9597	-9.50507	2.81164e-05	0.00100528	1.80541
0	3497731_1	crustin 1	7.48e-11	F:peptidase inhibitor activity; C:extracellular region	2	2	0.108079	6.74905	2.51276	0.0399292	0.695401	-6.1896
0	3497733_3	eukaryotic translation initiation factor subunit 5 82kda	3.86e-16	P:translational initiation; P:central nervous system development; C:cytoplasm; P:regulation of translation; P:glial cell differentiation; P:response to stress; F:binding	2	2	-0.215869	7.12873	-4.29108	0.00352822	0.0742702	-3.59351
0	3497747_1	ribosomal protein l44e	1.7e-32	P:mitotic spindle elongation; C:ribosome; F:structural constituent of ribosome; P:translation	2	2	2.76615	13.3621	52.1673	2.10475e-10	1.14549e-07	14.9026
0	3497749_1	isoform b	1.35e-06	0	2	2	-3.66286	9.94823	-25.7763	2.99107e-08	3.58131e-06	9.51405
0	3497750_1	subfamily member 1	3.84e-133	F:heat shock protein binding; P:sperm motility; P:DNA damage response, detection of DNA damage; P:protein folding; F:metal ion binding; P:response to heat; P:spermatogenesis; F:ATP binding; F:low-density lipoprotein receptor binding; F:unfolded protein binding; P:response to unfolded protein; C:cytoplasm; P:androgen receptor signaling pathway; C:membrane	2	2	-2.17113	8.7298	-17.9804	3.68179e-07	2.65572e-05	6.69919
0	3497757_1	tar dna-binding protein 43	3.39e-07	F:RNA binding; F:nucleic acid binding; F:nucleotide binding; P:P; C:C; F:DNA binding	2	2	1.29668	11.1606	21.7059	9.94013e-08	9.11863e-06	8.17097
0	3497757_2	rna recognition	9.66e-07	F:nucleic acid binding; F:nucleotide binding	2	2	1.32839	7.85741	25.3812	3.33256e-08	3.84699e-06	9.39349
0	3497760_2	h+ lysosomal accessory protein 1	2.96e-14	P:ATP synthesis coupled proton transport; P:cell death; C:integral to membrane; C:vacuolar membrane; C:vacuole; C:membrane; P:ion transport; P:aging; F:hydrogen ion transporting ATP synthase activity, rotational mechanism; F:ATP binding; F:F; F:proton-transporting ATPase activity, rotational mechanism; C:C; P:proton transport; C:proton-transporting V-type ATPase, V1 domain	2	2	0.0911525	6.61254	1.94873	0.0919514	1	-7.02952
0	3497762_1	catsup protein	2.64e-76	P:metal ion transport; C:membrane; F:metal ion transmembrane transporter activity	2	2	-0.652758	7.63388	-5.53376	0.000847043	0.0199113	-2.01627
0	3497766_1	n-glycosylase dna lyase	1e-45	F:DNA binding; C:nucleus; F:DNA-(apurinic or apyrimidinic site) lyase activity; P:DNA repair	2	2	0.323846	7.2546	6.55272	0.000305474	0.0080524	-0.877598
0	3497769_4	mitochondrial ribosomal	1.05e-35	C:mitochondrial large ribosomal subunit; F:structural constituent of ribosome	2	2	0.00714145	6.53828	0.186685	0.857154	1	-8.74384
0	3497769_5	hexokinase	5.06e-65	P:flight; P:carbohydrate metabolic process; P:cellular metabolic process; F:hexokinase activity; F:nucleotide binding	2	2	-0.190933	7.03241	-3.50509	0.00977528	0.189776	-4.70213
0	3497772_1	reverse transcriptase	0.000327	F:RNA binding; P:RNA-dependent DNA replication; F:RNA-directed DNA polymerase activity	2	2	0.111971	6.65505	2.6121	0.0345197	0.610087	-6.03907
0	3497772_2	endonuclease-reverse transcriptase	1.09e-65	F:RNA binding; P:RNA-dependent DNA replication; F:RNA-directed DNA polymerase activity	1	1	-0.627932	9.01407	-7.13051	0.00018033	0.00501315	-0.286662
0	3497772_3	endonuclease-reverse transcriptase	1.44e-99	F:RNA binding; P:RNA-dependent DNA replication; F:RNA-directed DNA polymerase activity	2	2	3.55697	9.01085	53.7978	1.6942e-10	1.01171e-07	15.1286
0	3497781_2	myosin heavy chain	5.53e-55	P:striated muscle contraction; P:dorsal closure, amnioserosa morphology change; P:establishment of neuroblast polarity; C:unconventional myosin complex; P:myosin II filament assembly; P:skeletal muscle thick filament assembly; P:ecdysone-mediated induction of salivary gland cell autophagic cell death; P:Malpighian tubule morphogenesis; P:dorsal closure, spreading of leading edge cells; P:sarcomer…	2	2	0.0584989	6.61366	1.36346	0.214584	1	-7.82197
0	3497793_1	fastkd1 protein	5.05e-38	F:protein kinase activity; F:ATP binding; P:apoptosis	2	2	-1.65682	11.5046	-38.3324	1.84453e-09	5.27901e-07	12.5856
0	3497794_2	actin-related protein 6	7.05e-109	C:cytoskeleton; F:protein binding; C:cytoplasm	2	2	0.0385089	7.43029	0.619551	0.554996	1	-8.55039
0	3497800_1	alkaline liver bone kidney	4.59e-13	C:extracellular space; F:metal ion binding; F:alkaline phosphatase activity; P:dephosphorylation; P:skeletal system development; P:response to vitamin D; C:plasma membrane; P:cementum mineralization; C:anchored to membrane; P:response to glucocorticoid stimulus; C:integral to membrane; P:response to antibiotic; P:response to lipopolysaccharide	2	2	-1.33025	7.64411	-8.59418	5.44691e-05	0.00176463	1.05984
0	3497800_4	alkaline phosphatase	7.98e-59	F:hydrolase activity	2	2	-0.104873	6.58804	-1.89364	0.0997453	1	-7.10886
0	3497803_3	eukaryotic translation initiation factor 3 subunit b	4.76e-25	C:eukaryotic translation initiation factor 3 complex; P:regulation of translational initiation; F:protein complex scaffold; F:translation initiation factor activity; C:cytosol	2	2	-0.219812	13.4884	-5.47677	0.000900138	0.0210637	-2.08391
0	3497805_1	3-oxoacyl-acyl-carrier-protein reductase	7.75e-73	F:catalytic activity; P:metabolic process	1	1	0.000819781	7.79183	0.0140683	0.989164	1	-8.76357
0	3497806_1	retinoblastoma-binding protein 4	0	P:negative regulation of transcription from RNA polymerase II promoter; F:histone binding; C:polytene chromosome; P:eggshell chorion gene amplification; F:histone deacetylase binding; F:histone acetyltransferase activity; F:histone methyltransferase activity (H3-K9 specific); P:dendrite morphogenesis; P:histone methylation; F:general RNA polymerase II transcription factor activity; C:ESC/E(Z) com…	2	2	0.193793	8.43255	3.15591	0.0158227	0.297057	-5.21825
0	3497810_2	microsomal glutathione s-transferase 1	6.08e-27	C:lipid particle; C:mitochondrion	1	1	-0.525209	7.63625	-5.75436	0.000672061	0.0162028	-1.75857
0	3497813_1	conserved hypothetical protein [Perkinsus marinus ATCC 50983]	0.00041	0	2	2	0.0489778	6.51983	1.00351	0.348733	1	-8.22648
0	3497815_1	gamma-interferon-inducible lysosomal thiol reductase precursor	9.08e-36	0	2	2	1.20584	7.85223	13.3683	2.83278e-06	0.000140295	4.39717
0	3497818_1	protein disulfide isomerase	3.83e-139	F:catalytic activity	2	2	-0.0173642	6.9936	-0.383887	0.712352	1	-8.68045
0	3497821_1	cg8844	3.32e-55	P:mitochondrial electron transport, NADH to ubiquinone; F:NADH dehydrogenase (ubiquinone) activity; C:mitochondrial respiratory chain complex I	2	2	-1.08524	10.745	-15.3135	1.11621e-06	6.43751e-05	5.4487
0	3497829_1	0	0	0	2	2	0.0755741	6.45658	1.47442	0.183472	1	-7.68217
0	3497833_1	exocyst complex component 2	1.74e-43	F:protein binding; P:transport	2	2	-1.04817	7.75108	-10.3006	1.64854e-05	0.000633162	2.40793
0	3497834_1	atp synthase	2.74e-105	F:proton-transporting ATPase activity, rotational mechanism; F:hydrogen-exporting ATPase activity, phosphorylative mechanism; P:growth; F:hydrogen ion transporting ATP synthase activity, rotational mechanism; P:auxin biosynthetic process; P:phagocytosis, engulfment; P:plasma membrane ATP synthesis coupled proton transport; P:spermatid development; C:lipid particle; C:mitochondrial proton-transpor…	2	2	1.0795	9.01826	12.3968	4.73498e-06	0.000214835	3.81689
0	3497834_2	atp synthase subunit	4.09e-66	F:proton-transporting ATPase activity, rotational mechanism; F:hydrogen-exporting ATPase activity, phosphorylative mechanism; P:growth; F:hydrogen ion transporting ATP synthase activity, rotational mechanism; P:auxin biosynthetic process; P:phagocytosis, engulfment; P:plasma membrane ATP synthesis coupled proton transport; P:spermatid development; C:lipid particle; C:mitochondrial proton-transpor…	2	2	-0.158747	13.2237	-2.84306	0.024688	0.447925	-5.68904
0	3497837_3	rho guanine dissociation factor	2.55e-54	C:cytoplasm; F:Rho GDP-dissociation inhibitor activity	2	2	-0.0843203	8.43496	-0.771435	0.465459	1	-8.43764
0	3497843_1	isoform a	6.33e-88	P:lipid metabolic process; F:sphingomyelin phosphodiesterase activity; P:sphingomyelin catabolic process; F:hydrolase activity	2	2	1.47135	9.3841	15.7666	9.1311e-07	5.458e-05	5.67532
0	3497847_1	splicing factor 14 kda subunit	4.57e-54	F:mRNA binding; P:mitotic spindle organization; F:protein binding; C:precatalytic spliceosome; P:nuclear mRNA splicing, via spliceosome; F:nucleotide binding; C:catalytic step 2 spliceosome	2	2	0.431927	11.1547	7.23853	0.000164015	0.0045945	-0.180202
0	3497854_1	mitochondrial ribosomal	1.59e-37	C:mitochondrial small ribosomal subunit; F:structural constituent of ribosome; P:translation	2	2	0.834929	9.8652	12.3055	4.97856e-06	0.000224378	3.76022
0	3497855_3	mterf domain-containing	9.41e-07	0	2	2	-0.0498346	7.70958	-1.08792	0.312338	1	-8.13926
0	3497856_2	tho complex subunit 1	1.17e-82	P:mRNA export from nucleus; P:signal transduction; F:protein binding	2	2	0.602321	8.00825	11.7257	6.90339e-06	0.000297526	3.39098
0	3497858_1	endonuclease-reverse transcriptase	4.05e-24	F:RNA binding; P:RNA-dependent DNA replication; F:zinc ion binding; F:RNA-directed DNA polymerase activity; C:intracellular	1	1	3.49588	8.96954	25.5578	3.17471e-08	3.72009e-06	9.44761
0	3497858_2	orf2-encoded protein	1.46e-13	F:RNA binding; P:RNA-dependent DNA replication; F:RNA-directed DNA polymerase activity	2	2	1.0455	7.44017	11.6182	7.3467e-06	0.00031337	3.32067
0	3497867_1	nuclear factor related to kappa b binding protein	1.04e-18	P:inflammatory response; F:specific RNA polymerase II transcription factor activity; P:transcription from RNA polymerase II promoter; F:DNA binding; C:nucleus; F:F; C:C; C:nucleolus; P:P	2	2	-0.001206	7.02044	-0.0250713	0.980691	1	-8.76332
0	3497873_1	AGAP011617-PA [Anopheles gambiae str. PEST]	2.4e-05	F:chitin binding; P:chitin metabolic process; F:calcium ion binding; F:serine-type endopeptidase inhibitor activity; C:extracellular region	2	2	-3.71088	9.13297	-36.2286	2.74367e-09	7.01216e-07	12.153
0	3497883_2	pol-like protein	1.52e-05	F:nucleic acid binding; F:RNA binding; F:ribonuclease H activity; P:RNA-dependent DNA replication; F:RNA-directed DNA polymerase activity	2	2	1.53536	8.74775	33.387	4.87194e-09	1.00595e-06	11.524
0	3497887_3	serine threonine protein phosphatase 4 regulatory	1.2e-28	P:mitotic cell cycle	2	2	0.0635594	7.05861	0.969809	0.364158	1	-8.25983
0	3497891_2	gtp-binding protein 10	5.41e-72	F:GTP binding; F:nucleotide binding; P:ribosome biogenesis; C:nucleus; C:intracellular	2	2	-2.04658	11.4657	-51.48	2.31104e-10	1.20611e-07	14.8048
0	3497896_2	short-chain dehydrogenase	7.12e-07	F:catalytic activity; P:metabolic process	2	2	-1.1004	9.77121	-5.891	0.000584101	0.0143212	-1.60215
0	3497896_3	retinol dehydrogenase 13	1.06e-51	P:metabolic process; F:oxidoreductase activity	2	2	0.136883	6.91094	3.31538	0.0126724	0.241639	-4.98106
0	3497897_2	novel protein	1.72e-16	F:binding	1	1	-0.364928	7.01159	-6.4556	0.000334924	0.00875071	-0.980635
0	3497904_2	nadh dehydrogenase	1.5e-12	C:membrane; C:mitochondrion	2	2	-1.09823	8.13571	-15.5635	9.98442e-07	5.83332e-05	5.57452
0	3497911_1	electron-transfer- beta polypeptide	6.04e-72	P:oxidative phosphorylation; F:electron carrier activity; C:lipid particle	1	1	0.232184	7.10164	5.74376	0.000679483	0.0163626	-1.77081
0	3497919_2	domain-containing histone demethylation protein	2.39e-100	P:P; C:C	2	2	0.0934081	6.93693	1.19122	0.272037	1	-8.02581
0	3497919_3	domain-containing histone demethylation protein	2.16e-130	0	2	2	-0.407627	7.71308	-7.47931	0.000133293	0.00383602	0.0527836
0	3497925_2	structural maintenance of chromosomes smc1	2.84e-44	F:ATP binding; P:chromosome organization; C:chromosome; F:protein binding	2	2	-0.136051	7.05945	-2.82717	0.0252597	0.45763	-5.71308
0	3497926_1	vacuolar protein sorting-associated protein 33b	1.99e-11	C:late endosome membrane; C:late endosome; C:platelet alpha granule; F:F; P:vesicle-mediated transport; P:cellular membrane fusion; C:HOPS complex; C:membrane; C:perinuclear region of cytoplasm; P:platelet alpha granule organization; P:melanosome localization; P:protein transport; P:P; C:endosome; C:cytoplasm; P:lysosome localization; C:lysosomal membrane; C:lysosome; P:transport; F:syntaxin-3 bi…	2	2	0.298751	7.99748	7.09711	0.000185739	0.00514739	-0.319833
0	3497926_2	vacuolar protein sorting-associated protein 33b	1.62e-34	P:vesicle-mediated transport; C:lysosome; P:organelle localization; C:vacuolar membrane; C:late endosome; F:syntaxin binding; P:cellular component organization	2	2	0.314081	7.71239	6.03461	0.000505261	0.0126275	-1.44031
0	3497926_3	vacuolar protein sorting-associated protein 33b	1.91e-23	P:lysosome localization; P:vesicle-mediated transport; C:lysosome; C:HOPS complex; P:melanosome localization; C:platelet alpha granule; C:late endosome; P:cellular membrane fusion; F:protein binding; C:perinuclear region of cytoplasm; P:platelet alpha granule organization; P:protein transport	2	2	0.209261	7.08953	4.94091	0.00162837	0.0362213	-2.74158
0	3497928_1	phenylalanyl-trna synthetase beta chain	8.62e-132	P:translation; F:binding; P:embryonic development ending in birth or egg hatching; P:growth; P:reproduction; P:nematode larval development; C:cytoplasm	2	2	0.0790038	7.41625	1.43358	0.194421	1	-7.73434
0	3497932_1	wd-repeat protein	3.5e-82	C:nucleus	2	2	0.932857	11.5407	20.0048	1.75498e-07	1.45908e-05	7.53278
0	3497939_1	ribosomal protein s16	8.69e-63	P:mitotic spindle elongation; F:RNA binding; F:SUMO binding; P:rRNA processing; F:structural constituent of ribosome; P:translational elongation; C:cytosolic small ribosomal subunit; P:ribosomal small subunit biogenesis; C:lipid particle	2	2	2.28102	13.2499	35.437	3.20478e-09	7.59982e-07	11.9832
0	3497946_1	hypothetical conserved protein	9.29e-34	F:F; C:integral to membrane	2	2	0.225543	6.84383	4.19646	0.00396923	0.0829159	-3.72257
0	3497951_2	aldehyde dehydrogenase	1.35e-27	F:oxidoreductase activity; P:oxidation reduction	2	2	-0.36758	7.83018	-6.60625	0.000290492	0.00770654	-0.82128
0	3497953_3	45 kda immunophilin fkbp45	5.28e-11	F:nucleic acid binding; F:peptidyl-prolyl cis-trans isomerase activity; P:protein folding; F:DNA binding; C:nucleus; F:isomerase activity	2	2	2.00101	10.2695	39.6714	1.44861e-09	4.32528e-07	12.8476
0	3497959_1	endonuclease-reverse transcriptase	3.92e-26	F:RNA binding; P:RNA-dependent DNA replication; F:zinc ion binding; F:endonuclease activity; C:intracellular; F:RNA-directed DNA polymerase activity	2	2	0.14536	6.63624	2.17393	0.0658712	1	-6.69892
0	3497960_3	mitochondrial import inner membrane translocase subunit tim9	5.47e-23	F:P-P-bond-hydrolysis-driven protein transmembrane transporter activity; P:protein targeting to mitochondrion; C:mitochondrial envelope; C:membrane	2	2	-0.130823	7.04756	-1.75803	0.121753	1	-7.30079
0	3497967_1	novel zinc finger protein protein	4.53e-13	F:nucleic acid binding; F:zinc ion binding; C:intracellular	2	2	-0.127596	6.99025	-2.26632	0.0574437	0.965505	-6.56106
0	3497972_1	pol-like protein	2.55e-83	F:nucleic acid binding; F:RNA binding; F:ribonuclease H activity; P:RNA-dependent DNA replication; F:endonuclease activity; F:RNA-directed DNA polymerase activity	2	2	-0.287861	7.76476	-5.21736	0.00119351	0.0271911	-2.39731
0	3497974_1	brother of odd with entrails isoform c	1.71e-139	P:wing disc development; F:nucleic acid binding; F:RNA polymerase II transcription factor activity; P:imaginal disc-derived leg joint morphogenesis; C:nucleus; F:zinc ion binding; P:hindgut morphogenesis	48	7	0.347362	7.03427	7.53531	0.000127112	0.00367006	0.10614
0	3497975_1	serine proteinase	1.96e-10	F:metalloendopeptidase activity; F:chitin binding; F:zinc ion binding; C:proteinaceous extracellular matrix; F:metallopeptidase activity; C:extracellular matrix; C:extracellular region; F:peptidase inhibitor activity; F:peptidase activity; F:serine-type endopeptidase inhibitor activity; P:chitin metabolic process	2	2	-1.78822	10.189	-20.2232	1.62729e-07	1.38157e-05	7.61766
0	3497977_3	parkin (ubiquitin e3 ligase prkn)	9.35e-14	P:response to oxidative stress; P:regulation of mitochondrion organization; P:negative regulation of JNK cascade; F:ubiquitin conjugating enzyme binding; P:spermatogenesis; F:ubiquitin-protein ligase activity; P:protein autoubiquitination; P:mitochondrial fission	2	2	-0.0357883	7.03914	-0.577128	0.581766	1	-8.57796
0	3497993_3	bax inhibitor-1-like protein	8.92e-49	P:spermatogenesis; C:integral to plasma membrane; P:apoptosis; P:lung development; C:insoluble fraction; C:nucleus; C:endoplasmic reticulum	2	2	0.472354	7.84964	4.29893	0.00349412	0.073635	-3.58286
0	3497994_1	cathepsin l	2.7e-63	F:cysteine-type peptidase activity	2	2	2.03065	9.20701	39.714	1.43772e-09	4.31351e-07	12.8558
0	3497994_2	cathepsin l	3.69e-40	F:cysteine-type peptidase activity	2	2	3.6491	9.11238	31.2841	7.69402e-09	1.35365e-06	11.0207
0	3497995_1	ribosomal rna methyltransferase 2	1.78e-35	P:cellular process	2	2	0.578813	10.1323	8.50847	5.81424e-05	0.00187006	0.986314
0	3497998_1	reverse transcriptase-like protein	6.55e-12	F:RNA binding; P:RNA-dependent DNA replication; F:RNA-directed DNA polymerase activity	2	2	-0.0465845	6.78657	-0.734389	0.486361	1	-8.46711
0	3498000_1	atp-dependent rna helicase dbp2	5.28e-13	C:cytosol; F:ATP-dependent RNA helicase activity; F:nucleic acid binding; C:nucleolus; P:rRNA processing; F:ATP binding; P:nuclear-transcribed mRNA catabolic process, nonsense-mediated decay	2	2	0.121623	7.43447	2.58042	0.0361571	0.63703	-6.08709
0	3498000_2	dead box atp-dependent rna helicase	1.25e-83	F:binding; F:hydrolase activity	2	2	0.164571	7.35981	3.1975	0.0149278	0.280851	-5.15619
0	3498006_2	malate dehydrogenase	1.24e-43	C:cytoplasm; F:acyltransferase activity; F:binding; F:L-malate dehydrogenase activity; P:malate metabolic process; P:oxidation reduction; P:tricarboxylic acid cycle; P:glycolysis	2	2	-0.36922	7.77245	-5.2579	0.00114136	0.0261565	-2.34773
0	3498013_2	serine incorporator 5	2.59e-25	P:myelination; P:phospholipid metabolic process; C:myelin sheath; C:membrane; C:Golgi apparatus	2	2	0.515276	7.22812	11.9467	6.08417e-06	0.000267037	3.53367
0	3498019_1	smu-1 suppressor of mec-8 and unc-52 homolog ( elegans)	0	C:nucleus; C:cytoplasm	2	2	1.3542	10.006	32.5625	5.80769e-09	1.12742e-06	11.3307
0	3498023_1	chromosome 20 open reading frame 4	8.36e-29	P:P; F:protein binding; C:C	2	2	0.0496323	9.70513	0.416564	0.68936	1	-8.66586
0	3498023_3	protein c20orf4 homolog	5.68e-35	P:P; F:protein binding; C:C	2	2	-0.138197	8.56994	-1.54012	0.167029	1	-7.59666
0	3498024_3	transposable element tc3	3.41e-31	P:regulation of transcription, DNA-dependent; F:transposase activity; P:DNA integration; F:sequence-specific DNA binding; P:transposition, DNA-mediated; F:transcription factor activity; C:intracellular; F:DNA binding	2	2	0.322893	7.55046	7.21309	0.000167702	0.00468939	-0.205165
0	3498024_4	transposable element tc3	1.08e-14	F:transposase activity; P:DNA integration; P:transposition, DNA-mediated; F:DNA binding	2	2	0.0503082	6.48801	1.12469	0.297467	1	-8.0997
0	3498028_1	endonuclease-reverse transcriptase	0.000123	F:RNA binding; P:RNA-dependent DNA replication; F:RNA-directed DNA polymerase activity	2	2	-0.0536887	6.90523	-1.31721	0.228873	1	-7.87837
0	3498052_2	trypsin	1.07e-44	F:hydrolase activity	2	2	0.0158109	6.58961	0.395817	0.703919	1	-8.67526
0	3498055_1	cell surface protein	1.16e-09	F:penicillin binding; F:phospholipid binding; F:catalytic activity; F:phosphoprotein phosphatase activity	2	2	0.0939633	6.58272	1.74317	0.12443	1	-7.32149
0	3498058_3	imitation isoform a	1.73e-76	P:ATP-dependent chromatin remodeling; P:positive regulation of transcription; F:DNA-dependent ATPase activity; F:protein binding; F:nucleosome binding; P:ecdysone receptor-mediated signaling pathway; P:dendrite morphogenesis; F:general RNA polymerase II transcription factor activity; P:nucleosome positioning; F:transferase activity; P:muscle organ development; C:transcription factor complex; C:NU…	2	2	-0.566869	12.1184	-13.0422	3.3525e-06	0.000160413	4.20691
0	3498059_2	nucleoporin nup37	5.21e-16	C:intracellular organelle	2	2	0.337298	10.1945	8.38116	6.41268e-05	0.00203752	0.875967
0	3498067_1	crustin i	6.01e-21	F:peptidase inhibitor activity; C:extracellular region	2	2	3.12452	9.85601	46.8184	4.51163e-10	1.9594e-07	14.0993
0	3498080_1	---NA---	0	0	2	2	2.22198	8.90141	30.3108	9.60528e-09	1.59962e-06	10.7756
0	3498083_1	stomatin-like protein 2	8.64e-12	C:membrane	2	2	-1.12242	10.8882	-22.0009	9.047e-08	8.49916e-06	8.27653
0	3498083_2	stomatin-like protein 2	1.74e-95	C:membrane	2	2	-0.244058	8.25633	-5.81764	0.000629612	0.0152921	-1.68584
0	3498091_1	abc1 family protein	2.37e-79	F:protein kinase activity; F:nucleotide binding	2	2	-0.0817021	7.00175	-1.19625	0.270192	1	-8.02011
0	3498095_1	protein downstream neighbor of son	1.7e-23	P:oxidation reduction; F:binding; F:oxidoreductase activity; P:metabolic process; F:catalytic activity; F:zinc ion binding	2	2	-1.47759	9.36494	-10.2957	1.65376e-05	0.000634457	2.40436
0	3498095_2	protein downstream neighbor of	8.74e-42	C:cytoplasm; P:cell proliferation; P:DNA amplification; C:nucleus	2	2	-0.0282396	6.94474	-0.550292	0.599075	1	-8.59448
0	3498100_1	trypsin	7.71e-82	C:extracellular region; F:serine-type peptidase activity	2	2	1.91377	8.24701	20.2352	1.62058e-07	1.37871e-05	7.6223
0	3498110_2	PREDICTED: similar to muted [Apis mellifera]	1.68e-08	0	2	2	-0.234655	8.44736	-2.12129	0.0712169	1	-6.77697
0	3498118_1	eukaryotic translation initiation factor 4 3	8.9e-18	F:binding	2	2	3.05632	9.48903	19.5409	2.06604e-07	1.64713e-05	7.34935
0	3498121_1	wd repeat domain 43	4.75e-12	P:organ development	2	2	0.892957	10.6062	15.9134	8.56576e-07	5.19037e-05	5.74742
0	3498121_2	wd repeat domain 43	1.45e-11	P:cell differentiation; P:blood vessel morphogenesis	2	2	1.01556	10.2813	24.5175	4.24585e-08	4.6424e-06	9.12312
0	3498121_3	loc398447 protein	3.82e-09	F:F; P:P; C:C	2	2	0.518881	7.33245	8.5637	5.57444e-05	0.00180031	1.03376
0	3498122_1	peptidase s1 and s6 chymotrypsin hap	4.29e-08	F:catalytic activity	2	2	-0.331961	7.96472	-5.73757	0.000683859	0.0164553	-1.77797
0	3498123_2	gpi mannosyltransferase 1	2.81e-54	P:preassembly of GPI anchor in ER membrane; F:transferase activity; C:endoplasmic reticulum	2	2	-1.18215	11.5808	-28.002	1.67444e-08	2.38511e-06	10.1596
0	3498123_3	gpi mannosyltransferase 1	6.57e-29	P:cellular process; C:membrane; F:transferase activity, transferring hexosyl groups	2	2	-0.0633354	7.85331	-1.37557	0.210974	1	-7.80701
0	3498123_4	p8 mtcp-1-like	0.000128	0	2	2	-0.0601222	7.24944	-1.22619	0.259414	1	-7.98584
0	3498126_4	rab6	3.87e-107	P:germarium-derived egg chamber formation; P:small GTPase mediated signal transduction; P:compound eye morphogenesis; P:exocytosis; F:sphingomyelin phosphodiesterase activity; P:pole plasm oskar mRNA localization; P:oocyte microtubule cytoskeleton polarization; F:protein binding; F:GTPase activity; P:protein transport; F:GTP binding	2	2	-1.26037	11.0026	-23.0621	6.51182e-08	6.55456e-06	8.64488
0	3498128_1	heat-shock protein 105	1.27e-74	P:protein folding; F:ATP binding; P:auxin biosynthetic process; F:chaperone binding	2	2	0.0955478	7.10131	2.31037	0.0538182	0.909986	-6.495
0	3498134_1	cg8444 cg8444-pa	1.19e-21	F:receptor activity; C:integral to membrane	2	2	0.169394	10.6771	3.22328	0.0144002	0.271337	-5.11778
0	3498134_2	PREDICTED: similar to CG8444-PA [Apis mellifera]	1.73e-08	F:receptor activity; C:integral to membrane	2	2	0.668203	7.86465	8.72254	4.94478e-05	0.00162141	1.16882
0	3498136_3	novel protein (zgc:55794)	4.82e-61	F:F; C:C	2	2	-1.37466	9.86648	-17.4499	4.53075e-07	3.10576e-05	6.46546
0	3498138_4	novel member of the keratin associated protein 4 family	6.26e-06	F:F; C:intermediate filament; C:keratin filament; P:P; F:protein binding; C:C	2	2	-1.03939	8.95853	-17.8609	3.85594e-07	2.7494e-05	6.64714
0	3498140_1	protein	1.68e-22	0	1	1	0.0918405	6.95508	0.904387	0.395576	1	-8.32206
0	3498140_2	protein	2.13e-19	C:nucleosome; P:nucleosome assembly; F:DNA binding	2	2	2.04426	7.99574	15.2361	1.15583e-06	6.64654e-05	5.40934
0	3498143_1	host cell factor c1	1.45e-37	P:cell cycle; F:protein binding; P:regulation of cellular process; C:intracellular part	2	2	0.0533699	6.84858	0.87846	0.408569	1	-8.34577
0	3498143_2	host cell factor c1	4.12e-129	P:positive regulation of mitotic cell cycle; C:MLL1 complex; P:regulation of protein complex assembly; P:regulation of transcription; F:identical protein binding; P:reactivation of latent virus; F:transcription factor activity; P:interspecies interaction between organisms; C:MLL5-L complex; F:transcription coactivator activity; C:cytoplasm; P:transcription from RNA polymerase II promoter	2	2	-0.0516201	6.82191	-1.31837	0.228505	1	-7.87697
0	3498146_4	wd repeat domain 59	1.55e-59	C:intracellular	2	2	0.0513943	6.95325	1.24149	0.25405	1	-7.96812
0	3498148_1	cg10206	4.26e-132	C:microtubule associated complex; P:rRNA processing	2	2	1.56642	12.7156	23.3665	5.94194e-08	6.06947e-06	8.74738
0	3498151_2	early growth response protein 1	4.07e-06	F:hydrolase activity; F:DNA binding; C:nucleus; F:nucleic acid binding; P:regulation of long-term neuronal synaptic plasticity; P:cellular response to mycophenolic acid; F:metal ion binding; P:cellular response to heparin; P:regulation of transcription, DNA-dependent; P:T cell differentiation; P:negative regulation of transcription from RNA polymerase II promoter; F:transcription activator activi…	2	2	1.78985	7.73092	19.7142	1.94303e-07	1.56841e-05	7.41837
0	3498154_1	eukaryotic translation initiation factor 3	5.14e-80	C:eukaryotic translation initiation factor 3 complex; P:translational initiation; P:salivary gland cell autophagic cell death	2	2	0.555562	10.6985	10.1526	1.81551e-05	0.000687514	2.29902
0	3498156_1	transposable element tc3	3.23e-08	P:regulation of transcription, DNA-dependent; F:transposase activity; P:DNA integration; F:sequence-specific DNA binding; P:transposition, DNA-mediated; F:transcription factor activity; C:intracellular; F:DNA binding	2	2	0.128226	6.72069	2.88979	0.0230842	0.42166	-5.61838
0	3498158_1	xeroderma pigmentosum d	0	P:response to UV; C:polytene chromosome puff; P:nucleotide-excision repair; C:polytene chromosome interband; P:transcription initiation from RNA polymerase II promoter; P:regulation of mitosis; F:general RNA polymerase II transcription factor activity; F:DNA binding; F:ATP binding; F:ATP-dependent 5'-3' DNA helicase activity; C:holo TFIIH complex; C:cytoplasm	2	2	0.613624	8.77634	13.8806	2.19075e-06	0.000113475	4.68744
0	3498158_2	dna repair helicase rad3 xp-d	1.02e-84	P:response to UV; C:polytene chromosome puff; P:nucleotide-excision repair; C:polytene chromosome interband; P:transcription initiation from RNA polymerase II promoter; P:regulation of mitosis; F:general RNA polymerase II transcription factor activity; F:DNA binding; F:ATP binding; F:ATP-dependent 5'-3' DNA helicase activity; C:holo TFIIH complex; C:cytoplasm	2	2	0.311176	7.23707	7.53849	0.000126772	0.00366193	0.109153
0	3498159_1	spindle pole body component 24 homolog	6.9e-14	0	2	2	-1.21272	10.4907	-18.4672	3.05917e-07	2.28729e-05	6.90777
0	3498161_1	ribosomal protein l30	4.03e-22	C:ribosome; F:structural constituent of ribosome; P:translation	2	2	2.64665	8.13514	32.656	5.69181e-09	1.11511e-06	11.3529
0	3498166_4	succinate-ubiquinone reductase cytochrome b small	2.39e-20	C:mitochondrial inner membrane; F:iron ion binding; P:tricarboxylic acid cycle; F:succinate dehydrogenase (ubiquinone) activity	2	2	-0.140131	7.65762	-2.32518	0.0526518	0.892207	-6.47275
0	3498170_3	citrate synthase	0	P:cellular carbohydrate metabolic process; P:citrate metabolic process; P:oxaloacetate metabolic process; F:protein binding; P:response to stress; C:mitochondrial matrix; F:citrate (Si)-synthase activity; P:tricarboxylic acid cycle	2	2	0.673349	8.77767	12.7185	3.97824e-06	0.000184931	4.0136
0	3498171_2	leucine rich repeat neuronal 1	6.61e-08	F:transmembrane receptor activity; C:integral to membrane; C:membrane; C:cytoplasm; C:intrinsic to membrane; P:signal transduction; F:receptor activity; F:transcription repressor activity; F:protein binding; P:innate immune response; P:optokinetic behavior; P:nervous system development; F:calcium ion binding; P:negative regulation of transcription; P:visual perception; C:PML body	2	2	0.0576364	6.47116	1.30909	0.231465	1	-7.88815
0	3498175_1	atp-dependent rna helicase	1.19e-151	P:auxin biosynthetic process; F:ATP-dependent RNA helicase activity; F:nucleic acid binding; C:precatalytic spliceosome; F:ATP binding; P:nuclear mRNA splicing, via spliceosome; C:catalytic step 2 spliceosome	2	2	0.508417	7.62853	7.89778	9.41151e-05	0.00284152	0.444105
0	3498179_1	atp-dependent rna and dna helicase	1.79e-35	F:DNA binding; P:DNA duplex unwinding; F:DNA helicase activity; C:mitochondrial nucleoid	2	2	-0.504166	10.0299	-8.74705	4.85497e-05	0.00159617	1.18948
0	3498179_3	atp-dependent rna and dna helicase	1.02e-59	F:DNA binding; P:DNA duplex unwinding; C:mitochondrial matrix; F:DNA helicase activity; F:nucleotide binding	2	2	0.0622757	6.98226	1.05683	0.325375	1	-8.17199
0	3498190_2	nuclear autoantigenic sperm protein	3.63e-25	F:protein binding; P:locomotion; P:cellular process; C:intracellular part	2	2	1.04806	10.0394	19.8744	1.83668e-07	1.50683e-05	7.48164
0	3498198_4	zgc:158463 protein	1.44e-11	P:P; C:C	2	2	4.42231	10.1769	24.9575	3.74916e-08	4.20292e-06	9.26204
0	3498201_1	smyd family member 5	1.91e-95	F:metal ion binding; C:mitochondrion; F:F; C:cytoplasmic membrane-bounded vesicle; F:zinc ion binding; P:P; C:C	2	2	-0.032948	7.48207	-0.486849	0.641103	1	-8.63065
0	3498203_1	ribosomal protein s23e	2.28e-74	F:structural constituent of ribosome; C:small ribosomal subunit; P:translation	2	2	2.40413	8.74326	35.1333	3.40474e-09	7.81132e-07	11.917
0	3498205_1	small nuclear rna activating polypeptide 50kda	1.62e-28	P:transcription	2	2	-0.616741	7.67827	-9.62474	2.5883e-05	0.000937297	1.89878
0	3498207_1	PREDICTED: hypothetical protein, partial [Monodelphis domestica]	0.00038	0	2	2	1.98241	11.9842	11.4428	8.14063e-06	0.000343694	3.20476
0	3498208_3	rio kinase 2	5.26e-08	F:kinase activity; F:ATP binding; F:transferase activity; F:nucleotide binding; F:catalytic activity; P:protein amino acid phosphorylation; F:protein serine/threonine kinase activity	2	2	3.01556	10.3227	14.1907	1.88306e-06	9.97822e-05	4.85835
0	3498209_1	lethal k09913	1.52e-09	0	2	2	-0.178511	6.75859	-3.13915	0.0161994	0.303214	-5.24331
0	3498209_2	lethal k09913	4.56e-11	0	2	2	0.0888808	6.63883	1.50615	0.175356	1	-7.64112
0	3498214_2	triosephosphate isomerase	6.59e-112	F:triose-phosphate isomerase activity; P:small molecule biosynthetic process; P:cellular biosynthetic process; P:monocarboxylic acid metabolic process; P:lipid biosynthetic process; P:glucose catabolic process	2	2	-0.862016	10.9416	-13.8419	2.23295e-06	0.000115181	4.6659
0	3498219_2	circadian clock-controlled protein precursor	2.98e-29	0	2	2	0.947407	7.37035	18.7453	2.75774e-07	2.09632e-05	7.02452
0	3498222_1	tpa: endonuclease-reverse transcriptase	3.08e-08	F:RNA binding; P:RNA-dependent DNA replication; F:RNA-directed DNA polymerase activity	2	2	0.731551	7.30089	8.47109	5.98311e-05	0.00191635	0.954063
0	3498223_3	lysosomal alpha-mannosidase (mannosidase alpha class 2b member 1)	3.98e-43	F:carbohydrate binding; F:cation binding; F:mannosidase activity; F:zinc ion binding; F:alpha-mannosidase activity; C:lysosome; P:mannose metabolic process; P:carbohydrate metabolic process; F:catalytic activity; C:C; F:hydrolase activity, hydrolyzing O-glycosyl compounds	2	2	1.65583	7.99542	29.9856	1.03606e-08	1.68884e-06	10.6918
0	3498236_3	endonuclease-reverse transcriptase	1.55e-27	F:RNA binding; P:RNA-dependent DNA replication; F:RNA-directed DNA polymerase activity	2	2	0.0219318	6.73508	0.311822	0.764175	1	-8.70857
0	3498244_1	juvenile hormone-inducible	7.04e-23	0	2	2	0.0585576	6.51124	1.07912	0.315987	1	-8.1486
0	3498246_1	translocase of inner mitochondrial membrane 13 homolog	9.92e-24	P:transmembrane transport; F:P-P-bond-hydrolysis-driven protein transmembrane transporter activity; C:mitochondrial inner membrane; F:metal ion binding; P:protein import into mitochondrial inner membrane; C:mitochondrial intermembrane space protein transporter complex	2	2	-1.30538	11.0659	-10.0181	1.98411e-05	0.000743652	2.19878
0	3498253_1	dna replication inhibitor	4.65e-06	F:LRR domain binding; C:nucleus; P:negative regulation of cell cycle; F:histone deacetylase binding; F:transcription repressor binding; C:nucleoplasm; F:promoter binding; P:negative regulation of gene expression; P:negative regulation of DNA replication; P:protein complex assembly; F:transcription corepressor activity; F:protein binding; P:organ morphogenesis; P:cell cycle	2	2	-1.52539	7.84394	-14.4931	1.62955e-06	8.84645e-05	5.02161
0	3498255_2	cg4644- partial	6.54e-60	F:transferase activity	2	2	0.111472	6.95921	1.82812	0.109852	1	-7.20223
0	3498255_3	dna-directed rna polymerase	7.06e-52	P:transcription; F:DNA-directed RNA polymerase activity	2	2	-0.00724259	6.39985	-0.157763	0.879057	1	-8.7495
0	3498257_2	mitochondrial 28s ribosomal protein s14	3.33e-16	C:ribosome	2	2	-1.15982	9.42423	-11.3499	8.60086e-06	0.000359943	3.14264
0	3498262_2	importin subunit alpha-2	3.59e-91	F:protein transporter activity; P:regulation of transcription by glucose; P:protein import into nucleus; F:histone deacetylase binding; C:nucleus	2	2	0.767778	8.58143	12.6382	4.15356e-06	0.000191647	3.96488
0	3498272_1	mettl2b protein	6.77e-73	F:transferase activity	2	2	1.65173	8.59377	11.3002	8.859e-06	0.000369006	3.10924
0	3498275_1	golgi-specific brefeldin a-resistance guanine nucleotide exchange factor 1	8.34e-13	F:transposase activity; P:DNA integration; P:transposition, DNA-mediated; F:DNA binding	2	2	0.00828604	7.31957	0.179666	0.862459	1	-8.7453
0	3498283_1	PREDICTED: similar to putative omega-gliadin [Monodelphis domestica]	1.8e-08	0	2	2	0.633544	9.25391	9.52243	2.77791e-05	0.000994937	1.81902
0	3498286_2	n-acetylglucosaminyltransferase vi	8.09e-06	0	2	2	-0.0809156	6.885	-1.07685	0.31693	1	-8.15099
0	3498291_1	x-box binding protein 1	1.04e-16	F:transcription regulator activity; F:DNA binding; P:regulation of transcription	2	2	-0.776488	9.57125	-19.1466	2.38052e-07	1.85965e-05	7.19001
0	3498294_2	solute carrier family member 27	2.11e-44	F:oxidative phosphorylation uncoupler activity; F:binding; C:mitochondrial inner membrane; P:transmembrane transport; P:mitochondrial transport; P:proton transport; C:integral to membrane; P:generation of precursor metabolites and energy	2	2	-0.349152	7.79091	-5.93801	0.000556873	0.0137448	-1.54889
0	3498296_3	conserved hypothetical protein [Phytophthora infestans T30-4]	0.000325	0	2	2	-2.93024	8.61006	-15.6059	9.79889e-07	5.75742e-05	5.59568
0	3498299_1	protein	1.41e-31	F:metalloendopeptidase activity; F:hydrolase activity; C:cytoplasm; F:zinc ion binding; P:multicellular organismal development; C:perinuclear region of cytoplasm; F:metallopeptidase activity; C:extracellular region; P:proteolysis; F:peptidase activity; C:cell cortex; F:metal ion binding; C:extracellular space	2	2	-0.0357002	6.74167	-0.781382	0.459952	1	-8.42952
0	3498308_1	hypothetical protein TSTA_111500 [Talaromyces stipitatus ATCC 10500]	5.21e-09	F:binding	2	2	1.13323	7.42673	19.149	2.37837e-07	1.85965e-05	7.19103
0	3498310_1	subfamily member 6	1.58e-41	F:heat shock protein binding; P:chorio-allantoic fusion; P:protein folding; P:intermediate filament organization; F:chaperone binding; P:negative regulation of caspase activity; F:transcription repressor activity; F:DNA binding; F:ATPase activator activity; C:perinuclear region of cytoplasm; P:negative regulation of transcription, DNA-dependent; C:nucleus	2	2	0.0883797	8.81534	1.68006	0.136433	1	-7.40862
0	3498311_5	---NA---	0	0	2	2	0.373597	10.77	9.7128	2.43678e-05	0.000888121	1.96685
0	3498315_2	monoacylglycerol acyltransferase 1	4.54e-47	P:lipid metabolic process; F:acyltransferase activity; C:membrane	2	2	1.12925	9.12286	9.08145	3.79694e-05	0.00130642	1.46657
0	3498315_3	diacylglycerol o-	5.57e-07	F:transferase activity	2	2	0.0125718	6.81986	0.212664	0.837594	1	-8.73796
0	3498320_1	chromosome 9 open reading frame 6	7.65e-22	P:glycine catabolic process; C:mitochondrion; F:F; P:P; C:glycine cleavage complex; C:C	2	2	-0.252422	8.48439	-2.11218	0.072185	1	-6.79043
0	3498322_1	thioredoxin 2	1.2e-34	P:response to hypoxia; P:response to oxidative stress; P:glycerol ether metabolic process; P:transport; F:peptide-methionine-(S)-S-oxide reductase activity; P:response to glucose stimulus; P:electron transport chain; P:response to hormone stimulus; C:mitochondrion; C:nucleolus; P:cellular response to nutrient levels; P:cell redox homeostasis; P:response to nutrient; F:protein complex binding; F:e…	2	2	-0.36899	6.94981	-6.49771	0.00032178	0.00843925	-0.935822
0	3498324_3	protein	1.9e-07	0	2	2	2.45698	8.08442	32.9475	5.34732e-09	1.06441e-06	11.4216
0	3498325_1	ribosomal protein l7a	3.01e-64	C:membrane fraction; C:polysomal ribosome; F:structural constituent of ribosome; F:RNA binding; C:cytosolic large ribosomal subunit; P:translational elongation	2	2	2.9823	12.8225	19.5118	2.08757e-07	1.65368e-05	7.3377
0	3498329_4	thymosin isoform 2	1.5e-36	C:cytosol; P:larval central nervous system remodeling; F:actin monomer binding	2	2	0.05625	8.22374	0.621444	0.553819	1	-8.54912
0	3498329_7	thymosin isoform 2	7.52e-30	P:cytoskeleton organization; C:cytosol; P:larval central nervous system remodeling; F:actin monomer binding	2	2	-1.24697	12.5541	-25.9168	2.87939e-08	3.51636e-06	9.55646
0	3498334_5	splicing factor	2.56e-107	F:metal ion binding; C:U1 snRNP; C:precatalytic spliceosome; F:enzyme binding; P:nuclear mRNA splicing, via spliceosome	2	2	0.21721	7.04126	5.06861	0.00140883	0.0317539	-2.58123
0	3498336_1	vacuolar protein sorting 37 homolog a ( cerevisiae)	4.1e-13	C:late endosome membrane; C:membrane; C:endosome; P:protein transport; C:nucleus	2	2	-0.0125628	9.59692	-0.287216	0.782187	1	-8.71688
0	3498343_1	transposable element tc3	8.86e-23	F:transposase activity; P:transposition, DNA-mediated; F:sequence-specific DNA binding; F:transcription factor activity; F:DNA binding; P:DNA integration; P:regulation of transcription, DNA-dependent; F:sigma factor activity; C:intracellular; P:transcription initiation	2	2	0.944831	9.45523	22.0089	9.02419e-08	8.49828e-06	8.27936
0	3498346_1	trypsin	4.26e-75	F:peptidase activity	2	2	2.68455	8.60162	34.0729	4.22319e-09	9.18347e-07	11.6809
0	3498347_1	zinc finger (c3hc4-type ring finger) family protein	0.000117	P:root morphogenesis; P:adaxial/abaxial pattern formation; C:vacuole; C:chloroplast; P:cell proliferation; C:nucleus; F:5S rRNA binding; F:metal ion binding; P:protein complex assembly; P:nucleocytoplasmic transport; C:membrane; F:structural constituent of ribosome; P:leaf morphogenesis; F:transcription factor activity; P:translation; C:cytosolic ribosome; C:cytosolic large ribosomal subunit; C:c…	2	2	-3.96775	9.93183	-46.5638	4.68836e-10	2.00807e-07	14.0585
0	3498348_1	replication factor c subunit 2	3.14e-131	P:auxin biosynthetic process; P:DNA replication; F:DNA clamp loader activity; P:nucleotide-excision repair, DNA gap filling; F:ATP binding; F:protein binding; C:nucleoplasm; C:DNA replication factor C complex	2	2	-0.435478	9.27769	-6.64221	0.000280891	0.00747737	-0.78363
0	3498352_1	transposable element tc3	0.000614	0	2	2	0.0706761	6.99148	1.12105	0.298913	1	-8.10365
0	3498354_1	uba and wwe domain containing 1	0	C:cytoplasm; C:nucleolus; P:cell differentiation; P:histone ubiquitination; F:DNA binding; F:protein binding; P:protein polyubiquitination; F:ubiquitin-protein ligase activity	2	2	0.724746	10.9258	15.7785	9.08356e-07	5.44006e-05	5.68121
0	3498364_3	hydroxyacyl-coenzyme a dehydrogenase 3-ketoacyl-coenzyme a thiolase enoyl-coenzyme a hydratase (trifunctional protein) beta subunit	6.91e-164	F:long-chain-enoyl-CoA hydratase activity; F:acyl-CoA binding; F:acetyl-CoA C-acyltransferase activity; C:mitochondrial inner membrane; C:fatty acid beta-oxidation multienzyme complex; C:mitochondrial nucleoid; F:NAD or NADH binding; F:3-hydroxyacyl-CoA dehydrogenase activity; P:fatty acid beta-oxidation; F:long-chain-3-hydroxyacyl-CoA dehydrogenase activity; F:enoyl-CoA hydratase activity	2	2	1.52517	9.28072	29.5425	1.15014e-08	1.81865e-06	10.5762
0	3498366_1	tyrosyl-trna synthetase	1.7e-103	P:translation; F:binding; F:ligase activity; C:cytoplasm	2	2	2.09658	9.47075	27.407	1.94644e-08	2.61087e-06	9.99236
0	3498369_1	cell division cycle 20 homolog ( cerevisiae)	7.28e-44	C:nucleoplasm; F:protein C-terminus binding; C:cytosol; C:spindle; P:positive regulation of cell proliferation; C:centrosome; C:protein complex; P:positive regulation of ubiquitin-protein ligase activity during mitotic cell cycle; C:perinuclear region of cytoplasm; P:anaphase-promoting complex-dependent proteasomal ubiquitin-dependent protein catabolic process; P:negative regulation of ubiquitin-…	2	2	-0.730783	10.6113	-7.42895	0.00013914	0.003973	0.00454387
0	3498372_3	phosphogluconate dehydrogenase	2.67e-50	F:NADP or NADPH binding; F:protein binding; P:oxidation reduction; P:pentose biosynthetic process; F:phosphogluconate dehydrogenase (decarboxylating) activity; P:pentose-phosphate shunt, oxidative branch	2	2	-0.338494	7.08851	-6.21279	0.000423508	0.0107561	-1.24312
0	3498380_1	rhodopsin	1.92e-147	F:G-protein coupled receptor activity; P:phototransduction; P:protein-chromophore linkage; P:G-protein coupled receptor protein signaling pathway; F:photoreceptor activity; P:visual perception; C:integral to membrane	2	2	0.0432499	6.77537	0.838137	0.429389	1	-8.38153
0	3498387_2	chromosome 20 open reading frame 6	1.73e-34	C:nucleus	2	2	1.20164	7.43566	12.7947	3.81988e-06	0.000178774	4.05949
0	3498398_5	novel protein	2.53e-09	F:RNA binding; F:metal ion binding; C:cytoplasm; F:zinc ion binding; F:protein binding; C:intracellular	2	2	-0.00472058	6.64002	-0.0750837	0.94223	1	-8.76046
0	3498404_1	histone h1	1.05e-06	C:chromosome; C:nucleosome; P:nucleosome assembly; F:DNA binding; C:nucleus	2	2	0.225315	7.41499	3.44407	0.0106206	0.205097	-4.79144
0	3498407_2	isoform g	5.08e-52	P:thermotaxis; C:membrane; P:transport	2	2	0.38636	7.5251	8.75241	4.83556e-05	0.00159064	1.19399
0	3498413_2	aspartyl-trna synthetase	1.44e-73	C:cytosol; C:soluble fraction; P:protein complex assembly; F:aminoacylase activity; F:protein binding; F:nucleotide binding; F:aminoacyl-tRNA ligase activity; P:tRNA aminoacylation for protein translation	2	2	0.21781	7.29789	2.77967	0.0270532	0.486573	-5.78501
0	3498425_3	5-aminolevulinic acid synthase	2.74e-36	P:biosynthetic process; F:transferase activity; C:cytoplasm	2	2	0.0211624	6.97265	0.424848	0.683585	1	-8.66198
0	3498426_2	citrate lyase beta like	5.44e-41	C:mitochondrion; F:lyase activity	2	2	0.125804	6.77404	2.28124	0.0561885	0.946199	-6.5387
0	3498432_4	---NA---	0	0	2	2	-0.275531	8.24389	-5.98479	0.000531182	0.0132009	-1.49617
0	3498437_1	transketolase	1.34e-109	P:metabolic process; C:lipid particle; F:catalytic activity	2	2	0.145297	6.89768	2.75759	0.0279321	0.500353	-5.81847
0	3498441_1	serine proteinase stubble	5.68e-26	F:serine-type endopeptidase activity; P:proteolysis	2	2	-3.08474	10.1317	-14.5533	1.58385e-06	8.62508e-05	5.05373
0	3498441_2	serine proteinase stubble	2.16e-36	F:peptidase activity	2	2	-1.38612	7.89287	-15.5361	1.0106e-06	5.88225e-05	5.56085
0	3498441_3	serine protease	2.98e-32	P:proteolysis; F:serine-type endopeptidase activity; F:catalytic activity; F:peptidase activity	2	2	-0.132651	6.76889	-1.61187	0.150625	1	-7.5012
0	3498443_1	PREDICTED: hypothetical protein, partial [Strongylocentrotus purpuratus]	0.000212	F:hydrolase activity, hydrolyzing O-glycosyl compounds; P:carbohydrate metabolic process; P:metabolic process; F:hydrolase activity; F:catalytic activity; F:hydrolase activity, acting on glycosyl bonds; F:cation binding; P:cell wall macromolecule catabolic process	2	2	0.153555	6.60061	3.57509	0.00889412	0.173865	-4.60022
0	3498447_2	kiaa0020	1.34e-16	C:nucleus	2	2	0.296483	7.88665	2.96123	0.020841	0.383312	-5.51054
0	3498447_3	kiaa0020 protein	1.34e-50	C:nucleolus; C:endoplasmic reticulum	2	2	-0.481593	11.6464	-6.62479	0.000285495	0.00759018	-0.801844
0	3498450_1	hypothetical protein BRAFLDRAFT_76038 [Branchiostoma floridae]	1.85e-20	F:nucleic acid binding; F:zinc ion binding; C:intracellular	2	2	-0.240428	7.26792	-3.58843	0.00873604	0.17099	-4.58086
0	3498452_3	protein	2.74e-14	F:nucleic acid binding; F:RNA binding; F:ribonuclease H activity; P:RNA-dependent DNA replication; F:zinc ion binding; F:RNA-directed DNA polymerase activity	2	2	0.0492511	6.51266	1.01254	0.344686	1	-8.2174
0	3498454_2	u6 snrna-associated sm-like protein lsm8	1.95e-26	F:U6 snRNA binding; F:protein binding; C:ribonucleoprotein complex; C:nucleus; P:nuclear mRNA splicing, via spliceosome	2	2	-1.23645	8.37167	-10.4336	1.51322e-05	0.000587732	2.50463
0	3498456_1	alpha-( )-fucosyltransferase 10	1.37e-33	P:wound healing; P:protein folding; P:hemopoiesis; P:L-fucose catabolic process; P:fertilization; P:protein targeting; P:nervous system development; P:embryonic development; F:alpha(1,3)-fucosyltransferase activity; P:protein amino acid glycosylation; C:membrane; C:Golgi apparatus	2	2	0.00371227	6.75709	0.0787403	0.939423	1	-8.76014
0	3498464_1	pol-like protein	2.7e-21	F:nucleic acid binding; F:RNA binding; F:ribonuclease H activity; P:RNA-dependent DNA replication; F:RNA-directed DNA polymerase activity	2	2	-0.831348	7.34867	-6.55921	0.000303613	0.00801354	-0.870753
0	3498464_2	cornichon homolog 4	1.03e-41	C:endoplasmic reticulum; F:protein binding	2	2	-0.199488	7.22829	-4.4074	0.00305822	0.0651786	-3.43659
0	3498470_3	ap-2 complex subunit beta-	9.04e-50	F:protein binding; F:protein transporter activity; P:vesicle-mediated transport; P:intracellular protein transport; C:clathrin adaptor complex	2	2	-0.943131	11.1732	-12.8379	3.73332e-06	0.000175119	4.08538
0	3498470_4	beta-adaptin drosophila 1	2.41e-68	P:visceral muscle development; F:protein binding; P:neurotransmitter secretion; F:protein transporter activity; P:heart development; P:synaptic vesicle coating; P:midgut development; P:intracellular protein transport; F:RNA polymerase II transcription factor activity, enhancer binding; P:regulation of gene-specific transcription from RNA polymerase II promoter; C:synaptic vesicle; P:mesodermal ce…	2	2	0.09512	6.5254	2.04462	0.0797871	1	-6.88988
0	3498472_1	nucleolar complex associated 4 homolog ( cerevisiae)	7.19e-43	F:protein binding; C:nuclear part	2	2	2.18674	10.0207	35.9461	2.89897e-09	7.25969e-07	12.0929
0	3498473_2	tripartite motif-containing 31	2.22e-06	F:metal ion binding; C:mitochondrion; F:ligase activity; C:cytoplasm; F:zinc ion binding; F:protein binding; C:intracellular	2	2	-1.92165	8.38339	-33.6153	4.6442e-09	9.74419e-07	11.5765
0	3498474_3	ubiquinone menaquinone biosynthesis methyltransferase	8.81e-87	F:transferase activity	2	2	-0.108853	7.88809	-1.51477	0.173208	1	-7.62989
0	3498477_1	arginine methyltransferase 7	1.8e-64	P:peptidyl-arginine methylation; F:protein-arginine omega-N symmetric methyltransferase activity	2	2	0.387041	6.98496	4.67606	0.00221511	0.0482192	-3.08153
0	3498480_1	structural maintenance of chromosomes 2	5.05e-82	C:cytoplasm; P:symbiosis, encompassing mutualism through parasitism; C:nuclear chromosome; C:condensin complex; P:mitotic chromosome condensation; F:ATP binding; F:protein heterodimerization activity; P:cell division	2	2	-0.793706	10.7134	-17.5526	4.3503e-07	3.01199e-05	6.51125
0	3498483_1	gf20795	9.25e-09	F:transposase activity; P:DNA integration; P:transposition, DNA-mediated; P:DNA recombination; F:DNA binding; C:nucleus	2	2	2.02525	8.17241	25.6307	3.11208e-08	3.66746e-06	9.46983
0	3498485_1	ribosomal protein l32	2.3e-43	C:ribosome; F:structural constituent of ribosome; P:translation	2	2	3.21788	11.521	16.8919	5.67321e-07	3.74028e-05	6.21204
0	3498486_1	sulfite reductase	1.21e-142	C:mitochondrial intermembrane space; F:transition metal ion binding; P:sulfur metabolic process; F:sulfite oxidase activity; P:protein catabolic process	2	2	-0.384704	7.29125	-5.15417	0.00128016	0.0290692	-2.47506
0	3498488_1	poly [adp-ribose] polymerase [Aedes aegypti]	4.34e-05	F:NAD+ ADP-ribosyltransferase activity; P:protein amino acid ADP-ribosylation; F:zinc ion binding; F:NAD or NADH binding; F:DNA binding; C:intracellular; C:nucleus	2	2	-0.319918	10.1299	-3.36671	0.0118071	0.226252	-4.90523
0	3498493_2	chaperone protein dnaj	1.37e-60	P:smoothened signaling pathway; F:patched binding; C:membrane; C:cytosol; C:mitochondrion	2	2	-1.36817	8.89793	-30.2476	9.74716e-09	1.60988e-06	10.7593
0	3498495_1	protein lsm14 homolog a	6.97e-34	F:RNA binding; P:negative regulation of translation; C:protein complex; C:cytoplasmic mRNA processing body; P:cytoplasmic mRNA processing body assembly; C:stress granule; F:DEAD/H-box RNA helicase binding	2	2	-0.185082	7.42727	-3.48574	0.0100352	0.19464	-4.73041
0	3498496_1	alpha beta hydrolase2	5.94e-79	F:lipase activity; P:lipid metabolic process	2	2	-0.277348	7.97159	-5.69257	0.00071662	0.0172036	-1.83011
0	3498496_3	alpha beta hydrolase2	5.3e-08	F:lipase activity; P:lipid metabolic process	2	2	-0.804084	8.34078	-17.3164	4.77822e-07	3.24673e-05	6.40554
0	3498497_2	rab interacting factor	8.89e-23	P:small GTPase mediated signal transduction; F:zinc ion binding; C:C; F:guanyl-nucleotide exchange factor activity	2	2	-0.51568	7.52561	-6.68564	0.000269764	0.00720279	-0.738348
0	3498507_1	cg8009- isoform a	3.8e-08	0	2	2	0.0644001	6.80008	1.17332	0.278696	1	-8.04598
0	3498508_1	rrna-processing protein fcf1 homolog	2.81e-57	P:chromatin-mediated maintenance of transcription; C:nucleus	2	2	0.0830004	11.0073	1.2999	0.23443	1	-7.89918
0	3498510_1	3 histone mrna	3.64e-39	F:hydrolase activity; F:nucleic acid binding; F:zinc ion binding; F:F; F:exonuclease activity; C:C; C:intracellular; F:metal ion binding; F:nuclease activity; P:P	2	2	-2.07311	10.5133	-46.9398	4.43004e-10	1.95126e-07	14.1187
0	3498513_3	poly -binding	7.27e-46	C:cytoplasm; P:lens development in camera-type eye; F:mRNA binding; C:precatalytic spliceosome; P:nuclear mRNA splicing, via spliceosome; F:nucleotide binding; C:catalytic step 2 spliceosome	2	2	-0.408797	9.93333	-5.83557	0.000618134	0.0150369	-1.66532
0	3498517_1	proteasome ( macropain) 26s 4	5.67e-141	F:peptidase activity; P:auxin biosynthetic process; C:proteasome complex; P:negative regulation of ubiquitin-protein ligase activity during mitotic cell cycle; C:mitochondrion; P:anaphase-promoting complex-dependent proteasomal ubiquitin-dependent protein catabolic process; F:ATP binding; F:ATPase activity; P:positive regulation of ubiquitin-protein ligase activity during mitotic cell cycle; F:pr…	2	2	0.0558589	6.55153	0.982407	0.358332	1	-8.24747
0	3498521_2	epididymal secretory protein e1 precursor	1.27e-22	C:extracellular region	2	2	0.916039	7.95897	19.5538	2.0566e-07	1.64555e-05	7.3545
0	3498522_1	elegans protein confirmed by transcript evidence	2.69e-23	C:intracellular membrane-bounded organelle; F:2 iron, 2 sulfur cluster binding	2	2	-0.426649	9.3851	-6.82642	0.000236967	0.00640976	-0.593061
0	3498526_1	sucrase- intestinal	3.1e-67	F:amylase activity; P:response to nutrient levels; C:Golgi apparatus; P:response to organic substance; F:alpha-glucosidase activity; C:membrane part	2	2	0.358566	6.85292	5.87486	0.000593786	0.0145357	-1.6205
0	3498526_2	alpha glucosidase	1.26e-09	F:hydrolase activity	2	2	1.23264	7.72929	11.865	6.37342e-06	0.000277186	3.4812
0	3498526_3	transposable element tc3	2.14e-20	P:transposition, DNA-mediated; F:DNA binding; F:transposase activity; P:DNA integration	2	2	1.41444	8.96833	16.7907	5.91379e-07	3.84985e-05	6.16522
0	3498529_1	y892_atv ame: full= vwfa domain-containing protein orf892	7.08e-05	0	2	2	0.022609	6.56255	0.505944	0.628295	1	-8.6202
0	3498535_1	phosphoglycerate kinase	5.92e-110	C:cytoplasm; F:phosphoglycerate kinase activity; P:synaptic transmission; P:glycolysis	2	2	-0.673736	7.54711	-9.14285	3.63247e-05	0.00125574	1.5165
0	3498535_2	phosphoglycerate kinase	1.12e-15	C:cytoplasm; F:phosphoglycerate kinase activity; F:ATP binding; P:glycolysis	2	2	-2.09241	11.4557	-47.6256	3.99962e-10	1.83997e-07	14.2271
0	3498538_1	heat repeat-containing protein 1	1.7e-23	F:binding; P:rRNA processing; P:regulation of cellular process	2	2	-1.67527	11.9765	-28.7899	1.37837e-08	2.08496e-06	10.3756
0	3498538_2	heat repeat containing 1	1.3e-13	P:RNA metabolic process; P:ribosome biogenesis; P:gene expression	2	2	0.12932	7.01482	2.38648	0.0480917	0.823245	-6.38045
0	3498544_2	mon1 homolog a	4.88e-24	0	2	2	-0.130535	6.69063	-2.48269	0.0417338	0.724797	-6.23511
0	3498547_1	moesin ezrin radixin	0	P:apical protein localization; C:subapical complex; C:lamellipodium; C:actin filament; C:filopodium; P:pole plasm protein localization; P:olfactory behavior; P:establishment or maintenance of epithelial cell apical/basal polarity; P:establishment or maintenance of polarity of larval imaginal disc epithelium; C:Golgi apparatus; F:actin binding; C:spindle; C:ruffle; C:fusome; P:regulation of membra…	2	2	-0.0931913	7.71392	-2.14297	0.0689647	1	-6.74488
0	3498549_1	salivary proline-rich protein	4.96e-06	F:phospholipase A2 activity; F:F; F:hydrolase activity; P:P; C:extracellular region; C:C	2	2	-0.0505822	6.85365	-1.16905	0.280303	1	-8.05075
0	3498556_1	atp synthase delta mitochondrial	4.5e-34	C:proton-transporting ATP synthase complex, catalytic core F(1); P:plasma membrane ATP synthesis coupled proton transport; F:hydrogen ion transporting ATP synthase activity, rotational mechanism; F:ATP binding; F:proton-transporting ATPase activity, rotational mechanism	2	2	-0.208814	12.3481	-2.89568	0.02289	0.418359	-5.60948
0	3498557_2	g patch domain-containing protein 4	1.6e-33	F:nucleic acid binding; C:intracellular	2	2	0.725204	8.83033	9.27121	3.31397e-05	0.0011584	1.61999
0	3498570_1	elegans protein partially confirmed by transcript evidence	2.82e-07	F:catalytic activity; P:cell wall macromolecule catabolic process	2	2	2.18697	8.21507	22.1718	8.57159e-08	8.15219e-06	8.33704
0	3498573_2	pet191 polypeptide	2.39e-23	0	2	2	0.0717991	7.799	1.23454	0.256474	1	-7.97618
0	3498574_1	eukaryotic translation initiation factor subunit 6 interacting protein	3e-78	C:eukaryotic translation initiation factor 3 complex; C:fibrillar center; P:translational initiation; C:nucleoplasm; F:protein binding; F:translation initiation factor activity	2	2	0.123339	12.6607	2.7537	0.0280901	0.503037	-5.82437
0	3498577_1	mitochondrial 28s ribosomal protein s25	1.17e-41	C:ribosome	2	2	1.73567	9.79121	23.9057	5.06635e-08	5.31495e-06	8.92568
0	3498579_1	n-acetyltransferase 10	1.59e-49	F:transferase activity; F:nucleotide binding; F:F; F:ATP binding; C:C; F:N-acetyltransferase activity; F:acyltransferase activity; F:protein binding; P:metabolic process; P:P	2	2	2.8726	9.06954	41.3962	1.0736e-09	3.44609e-07	13.1714
0	3498579_2	nat10 protein	3.47e-27	F:transferase activity	2	2	0.137609	6.90164	2.93539	0.0216245	0.39663	-5.54952
0	3498580_2	gm2 ganglioside activator	2.02e-09	P:neurological system process; P:ganglioside catabolic process; P:lipid metabolic process; C:mitochondrion; P:oligosaccharide catabolic process; C:lysosome; P:lipid storage; P:learning or memory; F:enzyme activator activity; P:neuromuscular process controlling balance; P:sphingolipid metabolic process	2	2	0.162214	7.22763	2.56201	0.0371457	0.652597	-6.115
0	3498585_1	zeta-coat protein	2.34e-62	P:transport; C:viral capsid	2	2	-0.0392221	9.83083	-0.686763	0.514131	1	-8.50315
[truncated: 5,718 more rows]
